# Supplementary material for: Gene Co-expression Network Analysis Suggests the Existence of Transcriptional Modules Containing a High Proportion of Transcriptionally Differentiated Homoeologs in Hexaploid Wheat
Source: Front Plant Sci. 2018 Aug 8;9:1163. doi: 10.3389/fpls.2018.01163 (PMC6092485; doi:10.3389/fpls.2018.01163)
Supplement: Supplementary file 3 [file Table_3.XLSX]

## Sheet: TableS3
Table S3. Comprehensive list of the homoeologous triplets
					Co-expression module			Pearson correlation coefficient			Number of expressed* times in the 727 RNA-seq datasets			Number of RNA-seq datasets with differential expression** between homoelogs			Homologs in Arabidopsis thaliana			Homologs in rice
Homoeologous triplet	A-homoeolog	B-homoeolog	D-homoeolog	Co-expression pattern	A-homoeolog	B-homoeolog	D-homoeolog	A-B	A-D	B-D	A-homoeolog	B-homoeolog	D-homoeolog	A-B	A-D	B-D	A-homoeolog	B-homoeolog	D-homoeolog	A-homoeolog	B-homoeolog	D-homoeolog
Homoeologous triplet 1	TRIAE_CS42_1AL_TGACv1_000002_AA0000050	TRIAE_CS42_1BL_TGACv1_031393_AA0113020	TRIAE_CS42_1DL_TGACv1_063371_AA0226680	ABD	1	1	1	0.876161	0.864793	0.897993	714	727	727	18	18	0	AT3G18820.1 | Symbols: ATRABG3F, ATRAB7B, RAB71, RABG3F, RAB7B | RAB GTPase homolog G3F | chr3:6484266-6486005 FORWARD LENGTH=206	AT3G18820.1 | Symbols: ATRABG3F, ATRAB7B, RAB71, RABG3F, RAB7B | RAB GTPase homolog G3F | chr3:6484266-6486005 FORWARD LENGTH=206	AT3G18820.1 | Symbols: ATRABG3F, ATRAB7B, RAB71, RABG3F, RAB7B | RAB GTPase homolog G3F | chr3:6484266-6486005 FORWARD LENGTH=206	LOC_Os05g44050.1 protein|ras-related protein, putative, expressed	LOC_Os05g44050.1 protein|ras-related protein, putative, expressed	LOC_Os05g44050.1 protein|ras-related protein, putative, expressed
Homoeologous triplet 2	TRIAE_CS42_1AL_TGACv1_000003_AA0000090	TRIAE_CS42_1BL_TGACv1_031688_AA0118850	TRIAE_CS42_1DL_TGACv1_061341_AA0192690	ABD	1	1	1	0.836471	0.918969	0.84158	692	711	678	3	0	0	AT2G28320.1 | Symbols: | Pleckstrin homology (PH) and lipid-binding START domains-containing protein | chr2:12095161-12099424 FORWARD LENGTH=737	AT2G28320.1 | Symbols: | Pleckstrin homology (PH) and lipid-binding START domains-containing protein | chr2:12095161-12099424 FORWARD LENGTH=737	AT2G28320.1 | Symbols: | Pleckstrin homology (PH) and lipid-binding START domains-containing protein | chr2:12095161-12099424 FORWARD LENGTH=737	LOC_Os10g33930.1 protein|DUF1336 domain containing protein, expressed	LOC_Os10g33930.1 protein|DUF1336 domain containing protein, expressed	LOC_Os10g33930.1 protein|DUF1336 domain containing protein, expressed
Homoeologous triplet 3	TRIAE_CS42_1AL_TGACv1_000008_AA0000300	TRIAE_CS42_1BL_TGACv1_031042_AA0106530	TRIAE_CS42_1DL_TGACv1_061259_AA0190320	AD-B	7	1	7	0.906278	0.922871	0.942631	244	214	260	2	5	8	AT5G58300.1 | Symbols: | Leucine-rich repeat protein kinase family protein | chr5:23572821-23574871 FORWARD LENGTH=654, AT5G58300.2 | Symbols: | Leucine-rich repeat protein kinase family protein | chr5:23572821-23574871 FORWARD LENGTH=654	AT5G58300.1 | Symbols: | Leucine-rich repeat protein kinase family protein | chr5:23572821-23574871 FORWARD LENGTH=654, AT5G58300.2 | Symbols: | Leucine-rich repeat protein kinase family protein | chr5:23572821-23574871 FORWARD LENGTH=654	AT5G58300.1 | Symbols: | Leucine-rich repeat protein kinase family protein | chr5:23572821-23574871 FORWARD LENGTH=654, AT5G58300.2 | Symbols: | Leucine-rich repeat protein kinase family protein | chr5:23572821-23574871 FORWARD LENGTH=654	LOC_Os05g40200.1 protein|inactive receptor kinase At2g26730 precursor, putative, expressed	LOC_Os05g40200.1 protein|inactive receptor kinase At2g26730 precursor, putative, expressed	LOC_Os05g40200.1 protein|inactive receptor kinase At2g26730 precursor, putative, expressed
Homoeologous triplet 4	TRIAE_CS42_1AL_TGACv1_000008_AA0000190	TRIAE_CS42_1BL_TGACv1_031311_AA0111410	TRIAE_CS42_1DL_TGACv1_061860_AA0204530	AB-D	6	6	2	0.674894	0.673598	0.743357	54	31	63	6	13	11	No hits found	No hits found	No hits found	LOC_Os05g13360.1 protein|expressed protein	LOC_Os05g13360.1 protein|expressed protein	LOC_Os05g13360.1 protein|expressed protein
Homoeologous triplet 5	TRIAE_CS42_1AL_TGACv1_000008_AA0000250	TRIAE_CS42_1BL_TGACv1_030572_AA0094480	TRIAE_CS42_1DL_TGACv1_064707_AA0235450	ABD	4	4	4	0.982605	0.981268	0.98093	44	39	39	0	0	0	AT4G11150.1 | Symbols: TUF, emb2448, TUFF, VHA-E1 | vacuolar ATP synthase subunit E1 | chr4:6800091-6801696 FORWARD LENGTH=230	AT4G11150.1 | Symbols: TUF, emb2448, TUFF, VHA-E1 | vacuolar ATP synthase subunit E1 | chr4:6800091-6801696 FORWARD LENGTH=230	AT4G11150.1 | Symbols: TUF, emb2448, TUFF, VHA-E1 | vacuolar ATP synthase subunit E1 | chr4:6800091-6801696 FORWARD LENGTH=230	LOC_Os05g40230.1 protein|vacuolar ATP synthase subunit E, putative, expressed	LOC_Os05g40230.1 protein|vacuolar ATP synthase subunit E, putative, expressed	LOC_Os05g40230.1 protein|vacuolar ATP synthase subunit E, putative, expressed
Homoeologous triplet 6	TRIAE_CS42_1AL_TGACv1_000008_AA0000170	TRIAE_CS42_1BL_TGACv1_033228_AA0137930	TRIAE_CS42_1DL_TGACv1_063695_AA0230000	AD-B	1	9	1	0.50709	0.662944	0.755465	678	608	679	43	21	51	AT1G06840.1 | Symbols: | Leucine-rich repeat protein kinase family protein | chr1:2097854-2103208 REVERSE LENGTH=953	AT1G06840.1 | Symbols: | Leucine-rich repeat protein kinase family protein | chr1:2097854-2103208 REVERSE LENGTH=953	AT1G06840.1 | Symbols: | Leucine-rich repeat protein kinase family protein | chr1:2097854-2103208 REVERSE LENGTH=953	LOC_Os05g40270.2 protein|expressed protein, LOC_Os05g40270.10 protein|expressed protein, LOC_Os05g40270.7 protein|expressed protein, LOC_Os05g40270.1 protein|expressed protein, LOC_Os05g40270.5 protein|expressed protein, LOC_Os05g40270.6 protein|expressed protein, LOC_Os05g40270.3 protein|expressed protein, LOC_Os05g40270.9 protein|expressed protein, LOC_Os05g40270.8 protein|expressed protein, LO…	LOC_Os05g40270.2 protein|expressed protein, LOC_Os05g40270.10 protein|expressed protein, LOC_Os05g40270.7 protein|expressed protein, LOC_Os05g40270.1 protein|expressed protein, LOC_Os05g40270.5 protein|expressed protein, LOC_Os05g40270.6 protein|expressed protein, LOC_Os05g40270.3 protein|expressed protein, LOC_Os05g40270.9 protein|expressed protein, LOC_Os05g40270.8 protein|expressed protein, LO…	LOC_Os05g40270.2 protein|expressed protein, LOC_Os05g40270.10 protein|expressed protein, LOC_Os05g40270.7 protein|expressed protein, LOC_Os05g40270.1 protein|expressed protein, LOC_Os05g40270.5 protein|expressed protein, LOC_Os05g40270.6 protein|expressed protein, LOC_Os05g40270.3 protein|expressed protein, LOC_Os05g40270.9 protein|expressed protein, LOC_Os05g40270.8 protein|expressed protein, LO…
Homoeologous triplet 7	TRIAE_CS42_1AL_TGACv1_000008_AA0000180	TRIAE_CS42_1BL_TGACv1_031311_AA0111400	TRIAE_CS42_1DL_TGACv1_061860_AA0204520	ABD	2	2	2	0.972468	0.976634	0.972337	539	529	530	0	3	2	AT1G32070.1 | Symbols: ATNSI, NSI | nuclear shuttle interacting | chr1:11534851-11536289 REVERSE LENGTH=257, AT1G32070.2 | Symbols: ATNSI, NSI | nuclear shuttle interacting | chr1:11534851-11536289 REVERSE LENGTH=258, AT1G32070.3 | Symbols: ATNSI, NSI | nuclear shuttle interacting | chr1:11534851-11536289 REVERSE LENGTH=257	AT1G32070.1 | Symbols: ATNSI, NSI | nuclear shuttle interacting | chr1:11534851-11536289 REVERSE LENGTH=257, AT1G32070.2 | Symbols: ATNSI, NSI | nuclear shuttle interacting | chr1:11534851-11536289 REVERSE LENGTH=258, AT1G32070.3 | Symbols: ATNSI, NSI | nuclear shuttle interacting | chr1:11534851-11536289 REVERSE LENGTH=257	AT1G32070.1 | Symbols: ATNSI, NSI | nuclear shuttle interacting | chr1:11534851-11536289 REVERSE LENGTH=257, AT1G32070.2 | Symbols: ATNSI, NSI | nuclear shuttle interacting | chr1:11534851-11536289 REVERSE LENGTH=258, AT1G32070.3 | Symbols: ATNSI, NSI | nuclear shuttle interacting | chr1:11534851-11536289 REVERSE LENGTH=257	LOC_Os05g40260.1 protein|acetyltransferase, GNAT family, putative, expressed	LOC_Os05g40260.1 protein|acetyltransferase, GNAT family, putative, expressed	LOC_Os05g40260.1 protein|acetyltransferase, GNAT family, putative, expressed
Homoeologous triplet 8	TRIAE_CS42_1AL_TGACv1_000008_AA0000160	TRIAE_CS42_1BL_TGACv1_033228_AA0137920	TRIAE_CS42_1DL_TGACv1_063695_AA0229990	ABD	1	1	1	0.831708	0.846227	0.886393	36	45	251	9	131	67	AT5G58280.1 | Symbols: | AP2/B3-like transcriptional factor family protein | chr5:23567338-23568670 FORWARD LENGTH=273	AT5G58280.1 | Symbols: | AP2/B3-like transcriptional factor family protein | chr5:23567338-23568670 FORWARD LENGTH=273	AT5G58280.1 | Symbols: | AP2/B3-like transcriptional factor family protein | chr5:23567338-23568670 FORWARD LENGTH=273	LOC_Os05g40280.1 protein|B3 DNA binding domain containing protein, expressed	LOC_Os05g40280.1 protein|B3 DNA binding domain containing protein, expressed	LOC_Os05g40280.1 protein|B3 DNA binding domain containing protein, expressed
Homoeologous triplet 9	TRIAE_CS42_1AL_TGACv1_000013_AA0000390	TRIAE_CS42_1BL_TGACv1_030621_AA0096040	TRIAE_CS42_1DL_TGACv1_061325_AA0192420	ABD	2	2	2	0.644837	0.756931	0.79661	690	684	658	2	59	13	AT1G01510.1 | Symbols: AN | NAD(P)-binding Rossmann-fold superfamily protein | chr1:187235-189836 FORWARD LENGTH=636	AT1G01510.1 | Symbols: AN | NAD(P)-binding Rossmann-fold superfamily protein | chr1:187235-189836 FORWARD LENGTH=636	AT1G01510.1 | Symbols: AN | NAD(P)-binding Rossmann-fold superfamily protein | chr1:187235-189836 FORWARD LENGTH=636	LOC_Os10g38900.1 protein|erythronate-4-phosphate dehydrogenase, putative, expressed	LOC_Os10g38900.1 protein|erythronate-4-phosphate dehydrogenase, putative, expressed	LOC_Os10g38900.1 protein|erythronate-4-phosphate dehydrogenase, putative, expressed
Homoeologous triplet 10	TRIAE_CS42_1AL_TGACv1_000013_AA0000410	TRIAE_CS42_1BL_TGACv1_030621_AA0096060	TRIAE_CS42_1DL_TGACv1_061325_AA0192440	BD-A	1	7	7	0.848324	0.754064	0.860003	43	38	15	5	19	12	AT1G01540.1 | Symbols: | Protein kinase superfamily protein | chr1:195980-197973 FORWARD LENGTH=386, AT1G01540.2 | Symbols: | Protein kinase superfamily protein | chr1:195980-198383 FORWARD LENGTH=472	AT1G01540.1 | Symbols: | Protein kinase superfamily protein | chr1:195980-197973 FORWARD LENGTH=386, AT1G01540.2 | Symbols: | Protein kinase superfamily protein | chr1:195980-198383 FORWARD LENGTH=472	AT1G01540.1 | Symbols: | Protein kinase superfamily protein | chr1:195980-197973 FORWARD LENGTH=386, AT1G01540.2 | Symbols: | Protein kinase superfamily protein | chr1:195980-198383 FORWARD LENGTH=472	LOC_Os10g38920.1 protein|protein kinase domain containing protein, expressed	LOC_Os10g38920.1 protein|protein kinase domain containing protein, expressed	LOC_Os10g38920.1 protein|protein kinase domain containing protein, expressed
Homoeologous triplet 11	TRIAE_CS42_1AL_TGACv1_000015_AA0000440	TRIAE_CS42_1BS_TGACv1_049580_AA0157170	TRIAE_CS42_1DS_TGACv1_080282_AA0245080	AD-B	1	8	1	0.418962	0.784002	0.482757	619	284	613	232	5	186	No hits found	No hits found	No hits found	LOC_Os01g66230.2 protein|csAtPR5, putative, expressed, LOC_Os01g66230.1 protein|csAtPR5, putative, expressed	LOC_Os01g66230.2 protein|csAtPR5, putative, expressed, LOC_Os01g66230.1 protein|csAtPR5, putative, expressed	LOC_Os01g66230.2 protein|csAtPR5, putative, expressed, LOC_Os01g66230.1 protein|csAtPR5, putative, expressed
Homoeologous triplet 12	TRIAE_CS42_1AL_TGACv1_000020_AA0000630	TRIAE_CS42_1BL_TGACv1_032266_AA0127690	TRIAE_CS42_1DL_TGACv1_062759_AA0219480	AD-B	1	7	1	0.746217	0.667875	0.475953	13	10	633	3	629	630	AT3G53190.1 | Symbols: | Pectin lyase-like superfamily protein | chr3:19714171-19717537 FORWARD LENGTH=483	AT3G53190.1 | Symbols: | Pectin lyase-like superfamily protein | chr3:19714171-19717537 FORWARD LENGTH=483	AT3G53190.1 | Symbols: | Pectin lyase-like superfamily protein | chr3:19714171-19717537 FORWARD LENGTH=483	LOC_Os10g31910.1 protein|pectate lyase precursor, putative, expressed	LOC_Os10g31910.1 protein|pectate lyase precursor, putative, expressed	LOC_Os10g31910.1 protein|pectate lyase precursor, putative, expressed
Homoeologous triplet 13	TRIAE_CS42_1AL_TGACv1_000024_AA0000670	TRIAE_CS42_1BL_TGACv1_032263_AA0127640	TRIAE_CS42_1DL_TGACv1_062779_AA0219760	ABD	1	1	1	0.658705	0.83344	0.77192	572	613	666	80	42	66	AT3G07300.1 | Symbols: | NagB/RpiA/CoA transferase-like superfamily protein | chr3:2324967-2327380 REVERSE LENGTH=407, AT3G07300.2 | Symbols: | NagB/RpiA/CoA transferase-like superfamily protein | chr3:2324967-2327380 REVERSE LENGTH=407, AT3G07300.3 | Symbols: | NagB/RpiA/CoA transferase-like superfamily protein | chr3:2324967-2327380 REVERSE LENGTH=409	AT3G07300.1 | Symbols: | NagB/RpiA/CoA transferase-like superfamily protein | chr3:2324967-2327380 REVERSE LENGTH=407, AT3G07300.2 | Symbols: | NagB/RpiA/CoA transferase-like superfamily protein | chr3:2324967-2327380 REVERSE LENGTH=407, AT3G07300.3 | Symbols: | NagB/RpiA/CoA transferase-like superfamily protein | chr3:2324967-2327380 REVERSE LENGTH=409	AT3G07300.1 | Symbols: | NagB/RpiA/CoA transferase-like superfamily protein | chr3:2324967-2327380 REVERSE LENGTH=407, AT3G07300.2 | Symbols: | NagB/RpiA/CoA transferase-like superfamily protein | chr3:2324967-2327380 REVERSE LENGTH=407, AT3G07300.3 | Symbols: | NagB/RpiA/CoA transferase-like superfamily protein | chr3:2324967-2327380 REVERSE LENGTH=409	LOC_Os10g25320.1 protein|initiation factor 2 subunit family domain containing protein, expressed, LOC_Os10g25320.2 protein|initiation factor 2 subunit family domain containing protein, expressed, LOC_Os10g25320.3 protein|initiation factor 2 subunit family domain containing protein, expressed	LOC_Os10g25320.1 protein|initiation factor 2 subunit family domain containing protein, expressed, LOC_Os10g25320.2 protein|initiation factor 2 subunit family domain containing protein, expressed, LOC_Os10g25320.3 protein|initiation factor 2 subunit family domain containing protein, expressed	LOC_Os10g25320.1 protein|initiation factor 2 subunit family domain containing protein, expressed, LOC_Os10g25320.2 protein|initiation factor 2 subunit family domain containing protein, expressed, LOC_Os10g25320.3 protein|initiation factor 2 subunit family domain containing protein, expressed
Homoeologous triplet 14	TRIAE_CS42_1AL_TGACv1_000024_AA0000690	TRIAE_CS42_1BL_TGACv1_031091_AA0107380	TRIAE_CS42_1DL_TGACv1_062779_AA0219740	ABD	1	1	1	0.60349	0.88732	0.48761	713	688	721	116	32	148	AT3G22790.1 | Symbols: | Kinase interacting (KIP1-like) family protein | chr3:8052446-8057888 REVERSE LENGTH=1728	AT3G22790.1 | Symbols: | Kinase interacting (KIP1-like) family protein | chr3:8052446-8057888 REVERSE LENGTH=1728	AT1G03080.1 | Symbols: | kinase interacting (KIP1-like) family protein | chr1:731794-737332 REVERSE LENGTH=1733	LOC_Os10g28610.1 protein|KIP1, putative, expressed	LOC_Os10g28610.1 protein|KIP1, putative, expressed	LOC_Os10g28610.1 protein|KIP1, putative, expressed
Homoeologous triplet 15	TRIAE_CS42_1AL_TGACv1_000028_AA0000860	TRIAE_CS42_1BL_TGACv1_031364_AA0112390	TRIAE_CS42_1DL_TGACv1_061374_AA0193380	ABD	1	1	1	0.898339	0.969508	0.879493	581	604	588	6	0	4	AT1G29940.1 | Symbols: NRPA2 | nuclear RNA polymerase A2 | chr1:10479322-10486670 REVERSE LENGTH=1178	AT1G29940.1 | Symbols: NRPA2 | nuclear RNA polymerase A2 | chr1:10479322-10486670 REVERSE LENGTH=1178	AT1G29940.1 | Symbols: NRPA2 | nuclear RNA polymerase A2 | chr1:10479322-10486670 REVERSE LENGTH=1178	LOC_Os10g35290.1 protein|DNA-directed RNA polymerase I subunit RPA2, putative, expressed	LOC_Os10g35290.1 protein|DNA-directed RNA polymerase I subunit RPA2, putative, expressed	LOC_Os10g35290.1 protein|DNA-directed RNA polymerase I subunit RPA2, putative, expressed
Homoeologous triplet 16	TRIAE_CS42_1AL_TGACv1_000029_AA0000890	TRIAE_CS42_1BL_TGACv1_032394_AA0129360	TRIAE_CS42_1DL_TGACv1_061480_AA0196490	ABD	1	1	1	0.944066	0.974549	0.952576	727	727	727	0	0	0	AT3G50670.1 | Symbols: U1-70K, U1SNRNP | U1 small nuclear ribonucleoprotein-70K | chr3:18826476-18829492 REVERSE LENGTH=427, AT3G50670.2 | Symbols: U1-70K, U1SNRNP | U1 small nuclear ribonucleoprotein-70K | chr3:18828232-18829492 REVERSE LENGTH=204	AT3G50670.1 | Symbols: U1-70K, U1SNRNP | U1 small nuclear ribonucleoprotein-70K | chr3:18826476-18829492 REVERSE LENGTH=427, AT3G50670.2 | Symbols: U1-70K, U1SNRNP | U1 small nuclear ribonucleoprotein-70K | chr3:18828232-18829492 REVERSE LENGTH=204	AT3G50670.1 | Symbols: U1-70K, U1SNRNP | U1 small nuclear ribonucleoprotein-70K | chr3:18826476-18829492 REVERSE LENGTH=427, AT3G50670.2 | Symbols: U1-70K, U1SNRNP | U1 small nuclear ribonucleoprotein-70K | chr3:18828232-18829492 REVERSE LENGTH=204	LOC_Os10g02630.1 protein|transposon protein, putative, CACTA, En/Spm sub-class, expressed	LOC_Os10g02630.1 protein|transposon protein, putative, CACTA, En/Spm sub-class, expressed	LOC_Os10g02630.1 protein|transposon protein, putative, CACTA, En/Spm sub-class, expressed
Homoeologous triplet 17	TRIAE_CS42_1AL_TGACv1_000032_AA0000960	TRIAE_CS42_2BS_TGACv1_146613_AA0469480	TRIAE_CS42_2DS_TGACv1_177161_AA0567160	AB-D	5	5	1	0.940109	0.948651	0.919644	166	130	143	4	1	4	AT4G37650.1 | Symbols: SHR, SGR7 | GRAS family transcription factor | chr4:17691871-17693466 FORWARD LENGTH=531	AT4G37650.1 | Symbols: SHR, SGR7 | GRAS family transcription factor | chr4:17691871-17693466 FORWARD LENGTH=531	AT4G37650.1 | Symbols: SHR, SGR7 | GRAS family transcription factor | chr4:17691871-17693466 FORWARD LENGTH=531	LOC_Os07g39820.1 protein|SHR, putative, expressed	LOC_Os07g39820.1 protein|SHR, putative, expressed	LOC_Os07g39820.1 protein|SHR, putative, expressed
Homoeologous triplet 18	TRIAE_CS42_1AL_TGACv1_000035_AA0001030	TRIAE_CS42_5BL_TGACv1_407294_AA1355540	TRIAE_CS42_5DL_TGACv1_434198_AA1431470	ABD	1	1	1	0.887986	0.92595	0.94796	93	59	76	8	0	2	AT4G34220.1 | Symbols: | Leucine-rich repeat protein kinase family protein | chr4:16381653-16384054 REVERSE LENGTH=757	AT4G34220.1 | Symbols: | Leucine-rich repeat protein kinase family protein | chr4:16381653-16384054 REVERSE LENGTH=757	AT4G34220.1 | Symbols: | Leucine-rich repeat protein kinase family protein | chr4:16381653-16384054 REVERSE LENGTH=757	LOC_Os09g02250.1 protein|transposon protein, putative, unclassified, expressed, LOC_Os09g02250.2 protein|transposon protein, putative, unclassified, expressed	LOC_Os09g02250.1 protein|transposon protein, putative, unclassified, expressed, LOC_Os09g02250.2 protein|transposon protein, putative, unclassified, expressed	LOC_Os09g02250.1 protein|transposon protein, putative, unclassified, expressed, LOC_Os09g02250.2 protein|transposon protein, putative, unclassified, expressed
Homoeologous triplet 19	TRIAE_CS42_1AL_TGACv1_000048_AA0001270	TRIAE_CS42_1BL_TGACv1_031347_AA0112110	TRIAE_CS42_1DL_TGACv1_064603_AA0235040	ABD	1	1	1	0.950803	0.957344	0.914499	727	727	727	0	0	0	AT3G58580.1 | Symbols: | DNAse I-like superfamily protein | chr3:21660866-21663697 REVERSE LENGTH=603	AT3G58580.1 | Symbols: | DNAse I-like superfamily protein | chr3:21660866-21663697 REVERSE LENGTH=603	AT3G58580.1 | Symbols: | DNAse I-like superfamily protein | chr3:21660866-21663697 REVERSE LENGTH=603	LOC_Os10g27230.1 protein|endonuclease/exonuclease/phosphatase family domain containing protein, expressed, LOC_Os10g27230.2 protein|endonuclease/exonuclease/phosphatase family domain containing protein, expressed, LOC_Os10g27230.3 protein|endonuclease/exonuclease/phosphatase family domain containing protein, expressed	LOC_Os10g27230.1 protein|endonuclease/exonuclease/phosphatase family domain containing protein, expressed, LOC_Os10g27230.2 protein|endonuclease/exonuclease/phosphatase family domain containing protein, expressed, LOC_Os10g27230.3 protein|endonuclease/exonuclease/phosphatase family domain containing protein, expressed	LOC_Os10g27230.1 protein|endonuclease/exonuclease/phosphatase family domain containing protein, expressed, LOC_Os10g27230.2 protein|endonuclease/exonuclease/phosphatase family domain containing protein, expressed, LOC_Os10g27230.3 protein|endonuclease/exonuclease/phosphatase family domain containing protein, expressed
Homoeologous triplet 20	TRIAE_CS42_1AL_TGACv1_000049_AA0001280	TRIAE_CS42_1BL_TGACv1_032043_AA0124660	TRIAE_CS42_1DL_TGACv1_062628_AA0217480	AB-D	1	1	3	0.783101	0.75321	0.85456	701	649	644	24	15	5	AT3G61060.2 | Symbols: AtPP2-A13, PP2-A13 | phloem protein 2-A13 | chr3:22603166-22604336 FORWARD LENGTH=291, AT3G61060.1 | Symbols: AtPP2-A13, PP2-A13 | phloem protein 2-A13 | chr3:22603166-22604336 FORWARD LENGTH=290	AT3G61060.2 | Symbols: AtPP2-A13, PP2-A13 | phloem protein 2-A13 | chr3:22603166-22604336 FORWARD LENGTH=291, AT3G61060.1 | Symbols: AtPP2-A13, PP2-A13 | phloem protein 2-A13 | chr3:22603166-22604336 FORWARD LENGTH=290	AT3G61060.2 | Symbols: AtPP2-A13, PP2-A13 | phloem protein 2-A13 | chr3:22603166-22604336 FORWARD LENGTH=291, AT3G61060.1 | Symbols: AtPP2-A13, PP2-A13 | phloem protein 2-A13 | chr3:22603166-22604336 FORWARD LENGTH=290	LOC_Os03g02550.1 protein|OsFBX76 - F-box domain containing protein, expressed	LOC_Os10g37830.2 protein|OsFBX391 - F-box domain containing protein, expressed, LOC_Os10g37830.1 protein|OsFBX391 - F-box domain containing protein, expressed	LOC_Os03g02550.1 protein|OsFBX76 - F-box domain containing protein, expressed
Homoeologous triplet 21	TRIAE_CS42_1AL_TGACv1_000050_AA0001320	TRIAE_CS42_1BL_TGACv1_031955_AA0123400	TRIAE_CS42_1DL_TGACv1_061959_AA0206410	ABD	4	4	4	0.991599	0.988669	0.990884	72	74	74	2	3	1	AT4G13450.1 | Symbols: | Adenine nucleotide alpha hydrolases-like superfamily protein | chr4:7815146-7815904 REVERSE LENGTH=219, AT4G13450.2 | Symbols: | Adenine nucleotide alpha hydrolases-like superfamily protein | chr4:7815395-7815904 REVERSE LENGTH=169	AT4G13450.1 | Symbols: | Adenine nucleotide alpha hydrolases-like superfamily protein | chr4:7815146-7815904 REVERSE LENGTH=219, AT4G13450.2 | Symbols: | Adenine nucleotide alpha hydrolases-like superfamily protein | chr4:7815395-7815904 REVERSE LENGTH=169	AT4G13450.1 | Symbols: | Adenine nucleotide alpha hydrolases-like superfamily protein | chr4:7815146-7815904 REVERSE LENGTH=219, AT4G13450.2 | Symbols: | Adenine nucleotide alpha hydrolases-like superfamily protein | chr4:7815395-7815904 REVERSE LENGTH=169	LOC_Os10g32590.1 protein|universal stress protein domain containing protein, putative, expressed	LOC_Os10g32590.1 protein|universal stress protein domain containing protein, putative, expressed	LOC_Os10g32590.1 protein|universal stress protein domain containing protein, putative, expressed
Homoeologous triplet 22	TRIAE_CS42_1AL_TGACv1_000051_AA0001410	TRIAE_CS42_1BL_TGACv1_031444_AA0114260	TRIAE_CS42_1DL_TGACv1_061869_AA0204900	AD-B	3	9	3	0.806858	0.846098	0.749198	49	63	84	19	54	23	AT3G03280.1 | Symbols: | unknown protein; FUNCTIONS IN: molecular_function unknown; INVOLVED IN: N-terminal protein myristoylation; LOCATED IN: cellular_component unknown; BEST Arabidopsis thaliana protein match is: unknown protein (TAIR:AT5G17350.1); Has 137 Blast hits to 137 proteins in 11 species: Archae - 0; Bacteria - 0; Metazoa - 0; Fungi - 0; Plants - 137; Viruses - 0; Other Eukaryotes - 0…	AT3G03280.1 | Symbols: | unknown protein; FUNCTIONS IN: molecular_function unknown; INVOLVED IN: N-terminal protein myristoylation; LOCATED IN: cellular_component unknown; BEST Arabidopsis thaliana protein match is: unknown protein (TAIR:AT5G17350.1); Has 137 Blast hits to 137 proteins in 11 species: Archae - 0; Bacteria - 0; Metazoa - 0; Fungi - 0; Plants - 137; Viruses - 0; Other Eukaryotes - 0…	AT3G03280.1 | Symbols: | unknown protein; FUNCTIONS IN: molecular_function unknown; INVOLVED IN: N-terminal protein myristoylation; LOCATED IN: cellular_component unknown; BEST Arabidopsis thaliana protein match is: unknown protein (TAIR:AT5G17350.1); Has 137 Blast hits to 137 proteins in 11 species: Archae - 0; Bacteria - 0; Metazoa - 0; Fungi - 0; Plants - 137; Viruses - 0; Other Eukaryotes - 0…	LOC_Os05g47960.1 protein|expressed protein	LOC_Os05g47960.1 protein|expressed protein	LOC_Os05g47960.1 protein|expressed protein
Homoeologous triplet 23	TRIAE_CS42_1AL_TGACv1_000051_AA0001340	TRIAE_CS42_1BL_TGACv1_031692_AA0118950	TRIAE_CS42_1DL_TGACv1_062210_AA0210500	ABD	1	1	1	0.983366	0.963945	0.968507	727	727	727	0	0	0	AT5G08680.1 | Symbols: | ATP synthase alpha/beta family protein | chr5:2821992-2824683 FORWARD LENGTH=559	AT5G08680.1 | Symbols: | ATP synthase alpha/beta family protein | chr5:2821992-2824683 FORWARD LENGTH=559	AT5G08680.1 | Symbols: | ATP synthase alpha/beta family protein | chr5:2821992-2824683 FORWARD LENGTH=559	LOC_Os01g49190.1 protein|ATP synthase, putative, expressed	LOC_Os01g49190.1 protein|ATP synthase, putative, expressed	LOC_Os01g49190.1 protein|ATP synthase, putative, expressed
Homoeologous triplet 24	TRIAE_CS42_1AL_TGACv1_000051_AA0001400	TRIAE_CS42_1BL_TGACv1_032560_AA0131510	TRIAE_CS42_1DL_TGACv1_061869_AA0204880	ABD	2	2	2	0.73758	0.892804	0.725978	283	80	487	190	14	365	AT5G63290.1 | Symbols: | Radical SAM superfamily protein | chr5:25369349-25370894 REVERSE LENGTH=484	AT5G63290.1 | Symbols: | Radical SAM superfamily protein | chr5:25369349-25370894 REVERSE LENGTH=484	AT5G63290.1 | Symbols: | Radical SAM superfamily protein | chr5:25369349-25370894 REVERSE LENGTH=484	LOC_Os12g17070.1 protein|radical SAM enzyme, putative, expressed, LOC_Os12g17070.2 protein|radical SAM enzyme, putative, expressed	LOC_Os12g17070.1 protein|radical SAM enzyme, putative, expressed, LOC_Os12g17070.2 protein|radical SAM enzyme, putative, expressed	LOC_Os12g17070.1 protein|radical SAM enzyme, putative, expressed, LOC_Os12g17070.2 protein|radical SAM enzyme, putative, expressed
Homoeologous triplet 25	TRIAE_CS42_1AL_TGACv1_000051_AA0001350	TRIAE_CS42_1BL_TGACv1_031692_AA0118940	TRIAE_CS42_1DL_TGACv1_062210_AA0210520	BD-A	16	1	1	0.554857	0.528571	0.683901	161	108	58	65	48	38	AT5G51600.1 | Symbols: PLE, ATMAP65-3, MAP65-3 | Microtubule associated protein (MAP65/ASE1) family protein | chr5:20961061-20964080 REVERSE LENGTH=707	AT5G51600.1 | Symbols: PLE, ATMAP65-3, MAP65-3 | Microtubule associated protein (MAP65/ASE1) family protein | chr5:20961061-20964080 REVERSE LENGTH=707	AT5G51600.1 | Symbols: PLE, ATMAP65-3, MAP65-3 | Microtubule associated protein (MAP65/ASE1) family protein | chr5:20961061-20964080 REVERSE LENGTH=707	LOC_Os01g49200.1 protein|microtubule associated protein, putative, expressed	LOC_Os01g49200.1 protein|microtubule associated protein, putative, expressed	LOC_Os01g49200.1 protein|microtubule associated protein, putative, expressed
Homoeologous triplet 26	TRIAE_CS42_1AL_TGACv1_000055_AA0001690	TRIAE_CS42_1BL_TGACv1_031023_AA0106000	TRIAE_CS42_1DL_TGACv1_061877_AA0205190	ABD	1	1	1	0.809978	0.775797	0.774295	446	458	99	3	67	52	AT1G48880.1 | Symbols: TBL7 | TRICHOME BIREFRINGENCE-LIKE 7 | chr1:18081033-18082650 FORWARD LENGTH=445	AT1G48880.1 | Symbols: TBL7 | TRICHOME BIREFRINGENCE-LIKE 7 | chr1:18081033-18082650 FORWARD LENGTH=445	AT1G48880.1 | Symbols: TBL7 | TRICHOME BIREFRINGENCE-LIKE 7 | chr1:18081033-18082650 FORWARD LENGTH=445	LOC_Os05g35190.1 protein|powdery mildew resistant protein 5, putative, expressed	LOC_Os05g35190.1 protein|powdery mildew resistant protein 5, putative, expressed	LOC_Os05g35190.1 protein|powdery mildew resistant protein 5, putative, expressed
Homoeologous triplet 27	TRIAE_CS42_1AL_TGACv1_000055_AA0001720	TRIAE_CS42_1BL_TGACv1_030437_AA0090690	TRIAE_CS42_1DL_TGACv1_061614_AA0199990	BD-A	14	1	1	0.9078	0.862246	0.90989	40	48	143	9	29	33	AT1G09812.1 | Symbols: | unknown protein; BEST Arabidopsis thaliana protein match is: unknown protein (TAIR:AT1G58007.2); Has 93 Blast hits to 93 proteins in 13 species: Archae - 0; Bacteria - 0; Metazoa - 0; Fungi - 0; Plants - 93; Viruses - 0; Other Eukaryotes - 0 (source: NCBI BLink). | chr1:3187817-3188580 FORWARD LENGTH=128	AT1G09812.1 | Symbols: | unknown protein; BEST Arabidopsis thaliana protein match is: unknown protein (TAIR:AT1G58007.2); Has 93 Blast hits to 93 proteins in 13 species: Archae - 0; Bacteria - 0; Metazoa - 0; Fungi - 0; Plants - 93; Viruses - 0; Other Eukaryotes - 0 (source: NCBI BLink). | chr1:3187817-3188580 FORWARD LENGTH=128	AT1G09812.1 | Symbols: | unknown protein; BEST Arabidopsis thaliana protein match is: unknown protein (TAIR:AT1G58007.2); Has 93 Blast hits to 93 proteins in 13 species: Archae - 0; Bacteria - 0; Metazoa - 0; Fungi - 0; Plants - 93; Viruses - 0; Other Eukaryotes - 0 (source: NCBI BLink). | chr1:3187817-3188580 FORWARD LENGTH=128	LOC_Os05g35230.1 protein|expressed protein	LOC_Os05g35230.1 protein|expressed protein	LOC_Os05g35230.1 protein|expressed protein
Homoeologous triplet 28	TRIAE_CS42_1AL_TGACv1_000055_AA0001700	TRIAE_CS42_1BL_TGACv1_031023_AA0105990	TRIAE_CS42_1DL_TGACv1_061877_AA0205200	Not clustered	0	0	0	0.751243	0.766117	0.967981	609	564	580	34	28	0	AT3G18660.1 | Symbols: PGSIP1, GUX1 | plant glycogenin-like starch initiation protein 1 | chr3:6419211-6421959 REVERSE LENGTH=655, AT3G18660.2 | Symbols: PGSIP1, GUX1 | plant glycogenin-like starch initiation protein 1 | chr3:6419211-6421959 REVERSE LENGTH=659, AT3G18660.3 | Symbols: PGSIP1, GUX1 | plant glycogenin-like starch initiation protein 1 | chr3:6419211-6421959 REVERSE LENGTH=654	AT3G18660.1 | Symbols: PGSIP1, GUX1 | plant glycogenin-like starch initiation protein 1 | chr3:6419211-6421959 REVERSE LENGTH=655, AT3G18660.2 | Symbols: PGSIP1, GUX1 | plant glycogenin-like starch initiation protein 1 | chr3:6419211-6421959 REVERSE LENGTH=659, AT3G18660.3 | Symbols: PGSIP1, GUX1 | plant glycogenin-like starch initiation protein 1 | chr3:6419211-6421959 REVERSE LENGTH=654	AT1G77130.1 | Symbols: PGSIP2, GUX3 | plant glycogenin-like starch initiation protein 2 | chr1:28979066-28981228 REVERSE LENGTH=618	LOC_Os01g65780.4 protein|glycosyl transferase, putative, expressed, LOC_Os01g65780.1 protein|glycosyl transferase, putative, expressed, LOC_Os01g65780.2 protein|glycosyl transferase, putative, expressed, LOC_Os01g65780.3 protein|glycosyl transferase, putative, expressed	LOC_Os01g65780.4 protein|glycosyl transferase, putative, expressed, LOC_Os01g65780.1 protein|glycosyl transferase, putative, expressed, LOC_Os01g65780.2 protein|glycosyl transferase, putative, expressed, LOC_Os01g65780.3 protein|glycosyl transferase, putative, expressed	LOC_Os01g65780.4 protein|glycosyl transferase, putative, expressed, LOC_Os01g65780.1 protein|glycosyl transferase, putative, expressed, LOC_Os01g65780.2 protein|glycosyl transferase, putative, expressed, LOC_Os01g65780.3 protein|glycosyl transferase, putative, expressed
Homoeologous triplet 29	TRIAE_CS42_1AL_TGACv1_000056_AA0001780	TRIAE_CS42_1BL_TGACv1_031344_AA0112040	TRIAE_CS42_1DL_TGACv1_061518_AA0197520	A-B-D	2	1	0	0.651479	0.812682	0.765078	727	727	727	19	0	0	AT3G58610.1 | Symbols: | ketol-acid reductoisomerase | chr3:21671561-21674639 FORWARD LENGTH=591, AT3G58610.2 | Symbols: | ketol-acid reductoisomerase | chr3:21671561-21674639 FORWARD LENGTH=591, AT3G58610.3 | Symbols: | ketol-acid reductoisomerase | chr3:21671561-21674639 FORWARD LENGTH=591	AT3G58610.1 | Symbols: | ketol-acid reductoisomerase | chr3:21671561-21674639 FORWARD LENGTH=591, AT3G58610.2 | Symbols: | ketol-acid reductoisomerase | chr3:21671561-21674639 FORWARD LENGTH=591, AT3G58610.3 | Symbols: | ketol-acid reductoisomerase | chr3:21671561-21674639 FORWARD LENGTH=591	AT3G58610.1 | Symbols: | ketol-acid reductoisomerase | chr3:21671561-21674639 FORWARD LENGTH=591, AT3G58610.2 | Symbols: | ketol-acid reductoisomerase | chr3:21671561-21674639 FORWARD LENGTH=591, AT3G58610.3 | Symbols: | ketol-acid reductoisomerase | chr3:21671561-21674639 FORWARD LENGTH=591	LOC_Os05g49800.1 protein|ketol-acid reductoisomerase, chloroplast precursor, putative, expressed	LOC_Os05g49800.1 protein|ketol-acid reductoisomerase, chloroplast precursor, putative, expressed	LOC_Os05g49800.1 protein|ketol-acid reductoisomerase, chloroplast precursor, putative, expressed
Homoeologous triplet 30	TRIAE_CS42_1AL_TGACv1_000056_AA0001810	TRIAE_CS42_1BL_TGACv1_030594_AA0095080	TRIAE_CS42_1DL_TGACv1_062158_AA0209620	ABD	1	1	1	0.895811	0.915032	0.919435	661	668	651	2	2	2	AT1G30820.1 | Symbols: | CTP synthase family protein | chr1:10945251-10948825 REVERSE LENGTH=600	AT1G30820.1 | Symbols: | CTP synthase family protein | chr1:10945251-10948825 REVERSE LENGTH=600	AT1G30820.1 | Symbols: | CTP synthase family protein | chr1:10945251-10948825 REVERSE LENGTH=600	LOC_Os05g49770.2 protein|CTP synthase, putative, expressed, LOC_Os05g49770.1 protein|CTP synthase, putative, expressed	LOC_Os05g49770.2 protein|CTP synthase, putative, expressed, LOC_Os05g49770.1 protein|CTP synthase, putative, expressed	LOC_Os05g49770.2 protein|CTP synthase, putative, expressed, LOC_Os05g49770.1 protein|CTP synthase, putative, expressed
Homoeologous triplet 31	TRIAE_CS42_1AL_TGACv1_000060_AA0001880	TRIAE_CS42_1BL_TGACv1_031854_AA0121830	TRIAE_CS42_1DL_TGACv1_061768_AA0203140	A-B-D	5	7	1	0.820997	0.852588	0.894796	80	128	152	4	18	7	AT2G44740.1 | Symbols: CYCP4;1 | cyclin p4;1 | chr2:18442287-18443304 REVERSE LENGTH=202	AT2G44740.1 | Symbols: CYCP4;1 | cyclin p4;1 | chr2:18442287-18443304 REVERSE LENGTH=202	AT2G44740.1 | Symbols: CYCP4;1 | cyclin p4;1 | chr2:18442287-18443304 REVERSE LENGTH=202	LOC_Os10g41430.1 protein|cyclin, putative, expressed	LOC_Os10g41430.1 protein|cyclin, putative, expressed	LOC_Os10g41430.1 protein|cyclin, putative, expressed
Homoeologous triplet 32	TRIAE_CS42_1AL_TGACv1_000064_AA0001950	TRIAE_CS42_1BL_TGACv1_032062_AA0124920	TRIAE_CS42_1DL_TGACv1_061146_AA0186900	AB-D	2	2	15	0.935899	0.946174	0.96141	680	555	682	195	2	107	AT5G23750.1 | Symbols: | Remorin family protein | chr5:8010004-8011453 REVERSE LENGTH=202, AT5G23750.2 | Symbols: | Remorin family protein | chr5:8010004-8011453 REVERSE LENGTH=201	AT5G23750.1 | Symbols: | Remorin family protein | chr5:8010004-8011453 REVERSE LENGTH=202, AT5G23750.2 | Symbols: | Remorin family protein | chr5:8010004-8011453 REVERSE LENGTH=201	AT5G23750.1 | Symbols: | Remorin family protein | chr5:8010004-8011453 REVERSE LENGTH=202, AT5G23750.2 | Symbols: | Remorin family protein | chr5:8010004-8011453 REVERSE LENGTH=201	LOC_Os10g36000.1 protein|remorin C-terminal domain containing protein, putative, expressed, LOC_Os10g36000.3 protein|remorin C-terminal domain containing protein, putative, expressed, LOC_Os10g36000.2 protein|remorin C-terminal domain containing protein, putative, expressed	LOC_Os10g36000.1 protein|remorin C-terminal domain containing protein, putative, expressed, LOC_Os10g36000.3 protein|remorin C-terminal domain containing protein, putative, expressed, LOC_Os10g36000.2 protein|remorin C-terminal domain containing protein, putative, expressed	LOC_Os10g36000.1 protein|remorin C-terminal domain containing protein, putative, expressed, LOC_Os10g36000.3 protein|remorin C-terminal domain containing protein, putative, expressed, LOC_Os10g36000.2 protein|remorin C-terminal domain containing protein, putative, expressed
Homoeologous triplet 33	TRIAE_CS42_1AL_TGACv1_000065_AA0001960	TRIAE_CS42_1BL_TGACv1_030798_AA0101070	TRIAE_CS42_1DL_TGACv1_061908_AA0205540	ABD	2	2	2	0.944551	0.946392	0.950425	661	685	648	1	1	0	AT3G01180.1 | Symbols: AtSS2, SS2 | starch synthase 2 | chr3:62456-65678 REVERSE LENGTH=792	AT3G01180.1 | Symbols: AtSS2, SS2 | starch synthase 2 | chr3:62456-65678 REVERSE LENGTH=792	AT3G01180.1 | Symbols: AtSS2, SS2 | starch synthase 2 | chr3:62456-65678 REVERSE LENGTH=792	LOC_Os10g30156.1 protein|starch synthase, putative, expressed	LOC_Os10g30156.1 protein|starch synthase, putative, expressed	LOC_Os10g30156.1 protein|starch synthase, putative, expressed
Homoeologous triplet 34	TRIAE_CS42_1AL_TGACv1_000066_AA0001980	TRIAE_CS42_1BL_TGACv1_030606_AA0095520	TRIAE_CS42_1DL_TGACv1_061456_AA0195850	ABD	1	1	1	0.823973	0.773431	0.722571	637	656	614	23	10	40	AT4G14342.1 | Symbols: | Splicing factor 3B subunit 5/RDS3 complex subunit 10 | chr4:8253789-8255405 REVERSE LENGTH=87	AT4G14342.1 | Symbols: | Splicing factor 3B subunit 5/RDS3 complex subunit 10 | chr4:8253789-8255405 REVERSE LENGTH=87	AT4G14342.1 | Symbols: | Splicing factor 3B subunit 5/RDS3 complex subunit 10 | chr4:8253789-8255405 REVERSE LENGTH=87	LOC_Os08g34480.1 protein|splicing factor 3B subunit 5, putative, expressed	LOC_Os08g34480.1 protein|splicing factor 3B subunit 5, putative, expressed	LOC_Os08g34480.1 protein|splicing factor 3B subunit 5, putative, expressed
Homoeologous triplet 35	TRIAE_CS42_1AL_TGACv1_000070_AA0002180	TRIAE_CS42_1BL_TGACv1_031077_AA0107260	TRIAE_CS42_1DL_TGACv1_062063_AA0208220	ABD	4	4	4	0.97337	0.974079	0.973697	77	58	60	1	2	0	AT1G04500.1 | Symbols: | CCT motif family protein | chr1:1221757-1224235 REVERSE LENGTH=386	AT1G04500.1 | Symbols: | CCT motif family protein | chr1:1221757-1224235 REVERSE LENGTH=386	AT1G04500.1 | Symbols: | CCT motif family protein | chr1:1221757-1224235 REVERSE LENGTH=386	LOC_Os10g32900.1 protein|CCT motif family protein, expressed, LOC_Os10g32900.2 protein|CCT motif family protein, expressed	LOC_Os10g32900.1 protein|CCT motif family protein, expressed, LOC_Os10g32900.2 protein|CCT motif family protein, expressed	LOC_Os10g32900.1 protein|CCT motif family protein, expressed, LOC_Os10g32900.2 protein|CCT motif family protein, expressed
Homoeologous triplet 36	TRIAE_CS42_1AL_TGACv1_000072_AA0002380	TRIAE_CS42_1BL_TGACv1_030573_AA0094570	TRIAE_CS42_1DL_TGACv1_062627_AA0217460	ABD	5	5	5	0.743942	0.898628	0.717388	242	115	219	182	41	136	AT1G19450.1 | Symbols: | Major facilitator superfamily protein | chr1:6731671-6734633 REVERSE LENGTH=488	AT1G19450.1 | Symbols: | Major facilitator superfamily protein | chr1:6731671-6734633 REVERSE LENGTH=488	AT1G19450.1 | Symbols: | Major facilitator superfamily protein | chr1:6731671-6734633 REVERSE LENGTH=488	LOC_Os05g49270.1 protein|transporter family protein, putative, expressed	LOC_Os05g49270.1 protein|transporter family protein, putative, expressed	LOC_Os05g49270.1 protein|transporter family protein, putative, expressed
Homoeologous triplet 37	TRIAE_CS42_1AL_TGACv1_000073_AA0002490	TRIAE_CS42_1BL_TGACv1_031835_AA0121500	TRIAE_CS42_1DL_TGACv1_063767_AA0230700	ABD	1	1	1	0.903101	0.861646	0.835245	55	30	18	1	2	1	AT2G17030.1 | Symbols: | F-box family protein with a domain of unknown function (DUF295) | chr2:7399108-7400650 FORWARD LENGTH=407	AT2G17030.1 | Symbols: | F-box family protein with a domain of unknown function (DUF295) | chr2:7399108-7400650 FORWARD LENGTH=407	AT2G17030.1 | Symbols: | F-box family protein with a domain of unknown function (DUF295) | chr2:7399108-7400650 FORWARD LENGTH=407	LOC_Os01g34630.1 protein|retrotransposon protein, putative, Ty1-copia subclass, expressed	LOC_Os01g34630.1 protein|retrotransposon protein, putative, Ty1-copia subclass, expressed	LOC_Os01g34630.1 protein|retrotransposon protein, putative, Ty1-copia subclass, expressed
Homoeologous triplet 38	TRIAE_CS42_1AL_TGACv1_000073_AA0002580	TRIAE_CS42_1BL_TGACv1_031835_AA0121450	TRIAE_CS42_1DL_TGACv1_063742_AA0230410	BD-A	7	1	1	0.88496	0.809195	0.806464	329	205	191	62	114	23	AT5G60860.1 | Symbols: AtRABA1f, RABA1f | RAB GTPase homolog A1F | chr5:24484750-24485565 FORWARD LENGTH=217	AT5G60860.1 | Symbols: AtRABA1f, RABA1f | RAB GTPase homolog A1F | chr5:24484750-24485565 FORWARD LENGTH=217	AT5G60860.1 | Symbols: AtRABA1f, RABA1f | RAB GTPase homolog A1F | chr5:24484750-24485565 FORWARD LENGTH=217	LOC_Os05g48980.1 protein|ras-related protein, putative, expressed	LOC_Os05g48980.1 protein|ras-related protein, putative, expressed	LOC_Os05g48980.1 protein|ras-related protein, putative, expressed
Homoeologous triplet 39	TRIAE_CS42_1AL_TGACv1_000076_AA0002630	TRIAE_CS42_1BL_TGACv1_030247_AA0083780	TRIAE_CS42_1DL_TGACv1_062301_AA0212110	ABD	1	1	1	0.80184	0.822173	0.768952	77	61	258	1	23	27	AT1G13630.1 | Symbols: | Tetratricopeptide repeat (TPR)-like superfamily protein | chr1:4669784-4672826 REVERSE LENGTH=806, AT1G13630.2 | Symbols: | Tetratricopeptide repeat (TPR)-like superfamily protein | chr1:4670178-4672826 REVERSE LENGTH=798	AT1G13630.1 | Symbols: | Tetratricopeptide repeat (TPR)-like superfamily protein | chr1:4669784-4672826 REVERSE LENGTH=806, AT1G13630.2 | Symbols: | Tetratricopeptide repeat (TPR)-like superfamily protein | chr1:4670178-4672826 REVERSE LENGTH=798	AT1G13630.1 | Symbols: | Tetratricopeptide repeat (TPR)-like superfamily protein | chr1:4669784-4672826 REVERSE LENGTH=806, AT1G13630.2 | Symbols: | Tetratricopeptide repeat (TPR)-like superfamily protein | chr1:4670178-4672826 REVERSE LENGTH=798	LOC_Os10g33874.1 protein|PPR repeat domain containing protein, putative, expressed	LOC_Os10g33874.1 protein|PPR repeat domain containing protein, putative, expressed	LOC_Os10g33874.1 protein|PPR repeat domain containing protein, putative, expressed
Homoeologous triplet 40	TRIAE_CS42_1AL_TGACv1_000077_AA0002650	TRIAE_CS42_1BL_TGACv1_032169_AA0126260	TRIAE_CS42_1DL_TGACv1_061438_AA0195320	ABD	1	1	1	0.923992	0.970063	0.930176	727	727	727	0	0	0	AT2G40960.1 | Symbols: | Single-stranded nucleic acid binding R3H protein | chr2:17095637-17097368 FORWARD LENGTH=351	AT2G40960.1 | Symbols: | Single-stranded nucleic acid binding R3H protein | chr2:17095637-17097368 FORWARD LENGTH=351	AT2G40960.1 | Symbols: | Single-stranded nucleic acid binding R3H protein | chr2:17095637-17097368 FORWARD LENGTH=351	LOC_Os05g34070.1 protein|DIP1, putative, expressed	LOC_Os05g34070.1 protein|DIP1, putative, expressed	LOC_Os05g34070.1 protein|DIP1, putative, expressed
Homoeologous triplet 41	TRIAE_CS42_1AL_TGACv1_000077_AA0002660	TRIAE_CS42_1BL_TGACv1_032169_AA0126250	TRIAE_CS42_1DL_TGACv1_061438_AA0195310	ABD	2	2	2	0.921497	0.953168	0.914838	290	255	353	1	1	2	AT4G30190.1 | Symbols: AHA2, PMA2, HA2 | H(+)-ATPase 2 | chr4:14770820-14775920 REVERSE LENGTH=948, AT4G30190.2 | Symbols: HA2 | H(+)-ATPase 2 | chr4:14770820-14775920 REVERSE LENGTH=981	AT4G30190.1 | Symbols: AHA2, PMA2, HA2 | H(+)-ATPase 2 | chr4:14770820-14775920 REVERSE LENGTH=948, AT4G30190.2 | Symbols: HA2 | H(+)-ATPase 2 | chr4:14770820-14775920 REVERSE LENGTH=981	AT4G30190.1 | Symbols: AHA2, PMA2, HA2 | H(+)-ATPase 2 | chr4:14770820-14775920 REVERSE LENGTH=948, AT4G30190.2 | Symbols: HA2 | H(+)-ATPase 2 | chr4:14770820-14775920 REVERSE LENGTH=981	LOC_Os04g56160.1 protein|plasma membrane ATPase, putative, expressed, LOC_Os04g56160.2 protein|plasma membrane ATPase, putative, expressed, LOC_Os04g56160.3 protein|plasma membrane ATPase, putative, expressed	LOC_Os04g56160.1 protein|plasma membrane ATPase, putative, expressed, LOC_Os04g56160.2 protein|plasma membrane ATPase, putative, expressed, LOC_Os04g56160.3 protein|plasma membrane ATPase, putative, expressed	LOC_Os04g56160.1 protein|plasma membrane ATPase, putative, expressed, LOC_Os04g56160.2 protein|plasma membrane ATPase, putative, expressed, LOC_Os04g56160.3 protein|plasma membrane ATPase, putative, expressed
Homoeologous triplet 42	TRIAE_CS42_1AL_TGACv1_000087_AA0002830	TRIAE_CS42_1BL_TGACv1_030950_AA0104200	TRIAE_CS42_1DL_TGACv1_061661_AA0201230	ABD	1	1	1	0.849062	0.850803	0.828617	727	727	727	0	13	5	AT5G43330.1 | Symbols: | Lactate/malate dehydrogenase family protein | chr5:17390552-17392449 FORWARD LENGTH=332	AT5G43330.1 | Symbols: | Lactate/malate dehydrogenase family protein | chr5:17390552-17392449 FORWARD LENGTH=332	AT5G43330.1 | Symbols: | Lactate/malate dehydrogenase family protein | chr5:17390552-17392449 FORWARD LENGTH=332	LOC_Os10g33800.2 protein|lactate/malate dehydrogenase, putative, expressed, LOC_Os10g33800.1 protein|lactate/malate dehydrogenase, putative, expressed, LOC_Os10g33800.3 protein|lactate/malate dehydrogenase, putative, expressed	LOC_Os10g33800.2 protein|lactate/malate dehydrogenase, putative, expressed, LOC_Os10g33800.1 protein|lactate/malate dehydrogenase, putative, expressed, LOC_Os10g33800.3 protein|lactate/malate dehydrogenase, putative, expressed	LOC_Os10g33800.2 protein|lactate/malate dehydrogenase, putative, expressed, LOC_Os10g33800.1 protein|lactate/malate dehydrogenase, putative, expressed, LOC_Os10g33800.3 protein|lactate/malate dehydrogenase, putative, expressed
Homoeologous triplet 43	TRIAE_CS42_1AL_TGACv1_000088_AA0002870	TRIAE_CS42_1BL_TGACv1_030398_AA0089530	TRIAE_CS42_1DL_TGACv1_062711_AA0218590	AD-B	2	6	2	0.919191	0.952606	0.878483	334	292	209	49	30	69	AT5G02580.2 | Symbols: | Plant protein 1589 of unknown function | chr5:579965-580292 FORWARD LENGTH=66, AT5G02580.1 | Symbols: | Plant protein 1589 of unknown function | chr5:579965-580454 FORWARD LENGTH=91	AT3G55240.1 | Symbols: | Plant protein 1589 of unknown function | chr3:20473876-20474705 REVERSE LENGTH=95	AT3G55240.1 | Symbols: | Plant protein 1589 of unknown function | chr3:20473876-20474705 REVERSE LENGTH=95	LOC_Os05g38680.1 protein|plant-specific domain TIGR01589 family protein, expressed	LOC_Os05g38680.1 protein|plant-specific domain TIGR01589 family protein, expressed	LOC_Os05g38680.1 protein|plant-specific domain TIGR01589 family protein, expressed
Homoeologous triplet 44	TRIAE_CS42_1AL_TGACv1_000091_AA0003020	TRIAE_CS42_1BL_TGACv1_031327_AA0111670	TRIAE_CS42_1DL_TGACv1_061827_AA0203960	ABD	19	19	19	0.948505	0.980006	0.9617	35	27	26	2	2	0	AT1G29640.1 | Symbols: | Protein of unknown function, DUF584 | chr1:10355959-10356381 REVERSE LENGTH=140	AT1G29640.1 | Symbols: | Protein of unknown function, DUF584 | chr1:10355959-10356381 REVERSE LENGTH=140	AT1G29640.1 | Symbols: | Protein of unknown function, DUF584 | chr1:10355959-10356381 REVERSE LENGTH=140	LOC_Os05g44260.1 protein|DUF584 domain containing protein, putative, expressed	LOC_Os05g44260.1 protein|DUF584 domain containing protein, putative, expressed	LOC_Os05g44260.1 protein|DUF584 domain containing protein, putative, expressed
Homoeologous triplet 45	TRIAE_CS42_1AL_TGACv1_000093_AA0003080	TRIAE_CS42_1BS_TGACv1_049346_AA0149580	TRIAE_CS42_1DS_TGACv1_081098_AA0257620	AB-D	1	1	4	0.643756	0.864313	0.340347	672	706	495	0	291	515	AT2G45620.1 | Symbols: | Nucleotidyltransferase family protein | chr2:18792943-18795750 FORWARD LENGTH=764	AT2G45620.1 | Symbols: | Nucleotidyltransferase family protein | chr2:18792943-18795750 FORWARD LENGTH=764	No hits found	LOC_Os10g11034.1 protein|caffeine-induced death protein 1, putative, expressed	LOC_Os10g11034.1 protein|caffeine-induced death protein 1, putative, expressed	No hits found
Homoeologous triplet 46	TRIAE_CS42_1AL_TGACv1_000097_AA0003190	TRIAE_CS42_1BL_TGACv1_031926_AA0122940	TRIAE_CS42_1DL_TGACv1_061151_AA0187150	ABD	1	1	1	0.950035	0.939842	0.965007	727	727	727	0	0	0	AT2G26890.1 | Symbols: GRV2, KAM2 | DNAJ heat shock N-terminal domain-containing protein | chr2:11462327-11473841 REVERSE LENGTH=2554	AT2G26890.1 | Symbols: GRV2, KAM2 | DNAJ heat shock N-terminal domain-containing protein | chr2:11462327-11473841 REVERSE LENGTH=2554	AT2G26890.1 | Symbols: GRV2, KAM2 | DNAJ heat shock N-terminal domain-containing protein | chr2:11462327-11473841 REVERSE LENGTH=2554	LOC_Os10g42439.1 protein|heat shock protein DnaJ, putative, expressed	LOC_Os10g42439.1 protein|heat shock protein DnaJ, putative, expressed	LOC_Os10g42439.1 protein|heat shock protein DnaJ, putative, expressed
Homoeologous triplet 47	TRIAE_CS42_1AL_TGACv1_000099_AA0003260	TRIAE_CS42_1BL_TGACv1_032182_AA0126440	TRIAE_CS42_1DL_TGACv1_061484_AA0196620	BD-A	4	9	9	0.952722	0.968353	0.965974	356	314	325	20	14	12	AT2G43120.1 | Symbols: | RmlC-like cupins superfamily protein | chr2:17927339-17928871 FORWARD LENGTH=321	AT2G43120.1 | Symbols: | RmlC-like cupins superfamily protein | chr2:17927339-17928871 FORWARD LENGTH=321	AT2G43120.1 | Symbols: | RmlC-like cupins superfamily protein | chr2:17927339-17928871 FORWARD LENGTH=321	LOC_Os08g27720.2 protein|pirin, putative, expressed, LOC_Os08g27720.1 protein|pirin, putative, expressed	LOC_Os08g27720.2 protein|pirin, putative, expressed, LOC_Os08g27720.1 protein|pirin, putative, expressed	LOC_Os08g27720.2 protein|pirin, putative, expressed, LOC_Os08g27720.1 protein|pirin, putative, expressed
Homoeologous triplet 48	TRIAE_CS42_1AL_TGACv1_000099_AA0003280	TRIAE_CS42_1BL_TGACv1_032977_AA0135970	TRIAE_CS42_1DL_TGACv1_061484_AA0196590	AD-B	8	1	8	0.921481	0.935099	0.883649	720	718	708	0	1	1	AT1G79830.1 | Symbols: GC5 | golgin candidate 5 | chr1:30028110-30033508 REVERSE LENGTH=956, AT1G79830.2 | Symbols: GC5 | golgin candidate 5 | chr1:30028110-30033508 REVERSE LENGTH=956, AT1G79830.4 | Symbols: GC5 | golgin candidate 5 | chr1:30028110-30033508 REVERSE LENGTH=976, AT1G79830.3 | Symbols: GC5 | golgin candidate 5 | chr1:30028110-30033508 REVERSE LENGTH=956	AT1G79830.1 | Symbols: GC5 | golgin candidate 5 | chr1:30028110-30033508 REVERSE LENGTH=956, AT1G79830.2 | Symbols: GC5 | golgin candidate 5 | chr1:30028110-30033508 REVERSE LENGTH=956, AT1G79830.4 | Symbols: GC5 | golgin candidate 5 | chr1:30028110-30033508 REVERSE LENGTH=976, AT1G79830.3 | Symbols: GC5 | golgin candidate 5 | chr1:30028110-30033508 REVERSE LENGTH=956	AT1G79830.1 | Symbols: GC5 | golgin candidate 5 | chr1:30028110-30033508 REVERSE LENGTH=956, AT1G79830.2 | Symbols: GC5 | golgin candidate 5 | chr1:30028110-30033508 REVERSE LENGTH=956, AT1G79830.4 | Symbols: GC5 | golgin candidate 5 | chr1:30028110-30033508 REVERSE LENGTH=976, AT1G79830.3 | Symbols: GC5 | golgin candidate 5 | chr1:30028110-30033508 REVERSE LENGTH=956	LOC_Os05g48620.1 protein|tRNA-binding arm, putative, expressed	LOC_Os05g48620.1 protein|tRNA-binding arm, putative, expressed	LOC_Os05g48620.1 protein|tRNA-binding arm, putative, expressed
Homoeologous triplet 49	TRIAE_CS42_1AL_TGACv1_000099_AA0003250	TRIAE_CS42_1BL_TGACv1_030454_AA0091040	TRIAE_CS42_1DL_TGACv1_062668_AA0218050	ABD	2	2	2	0.892437	0.982645	0.917969	596	575	620	203	3	269	AT1G52230.1 | Symbols: PSAH2, PSAH-2, PSI-H | photosystem I subunit H2 | chr1:19454902-19455508 FORWARD LENGTH=145	AT1G52230.1 | Symbols: PSAH2, PSAH-2, PSI-H | photosystem I subunit H2 | chr1:19454902-19455508 FORWARD LENGTH=145	AT1G52230.1 | Symbols: PSAH2, PSAH-2, PSI-H | photosystem I subunit H2 | chr1:19454902-19455508 FORWARD LENGTH=145	LOC_Os05g48630.2 protein|expressed protein, LOC_Os05g48630.1 protein|expressed protein	LOC_Os05g48630.2 protein|expressed protein, LOC_Os05g48630.1 protein|expressed protein	LOC_Os05g48630.2 protein|expressed protein, LOC_Os05g48630.1 protein|expressed protein
Homoeologous triplet 50	TRIAE_CS42_1AL_TGACv1_000103_AA0003410	TRIAE_CS42_1BL_TGACv1_030413_AA0089940	TRIAE_CS42_1DL_TGACv1_061148_AA0187060	A-B-D	6	4	1	0.824309	0.772405	0.831119	662	523	661	30	2	24	AT5G04480.1 | Symbols: | UDP-Glycosyltransferase superfamily protein | chr5:1271886-1277793 REVERSE LENGTH=1050, AT5G04480.2 | Symbols: | UDP-Glycosyltransferase superfamily protein | chr5:1271886-1277793 REVERSE LENGTH=1035	AT5G04480.1 | Symbols: | UDP-Glycosyltransferase superfamily protein | chr5:1271886-1277793 REVERSE LENGTH=1050, AT5G04480.2 | Symbols: | UDP-Glycosyltransferase superfamily protein | chr5:1271886-1277793 REVERSE LENGTH=1035	AT5G04480.1 | Symbols: | UDP-Glycosyltransferase superfamily protein | chr5:1271886-1277793 REVERSE LENGTH=1050, AT5G04480.2 | Symbols: | UDP-Glycosyltransferase superfamily protein | chr5:1271886-1277793 REVERSE LENGTH=1035	LOC_Os10g39900.1 protein|glycosyltransferase family protein 1, putative, expressed	LOC_Os10g39900.1 protein|glycosyltransferase family protein 1, putative, expressed	LOC_Os10g39900.1 protein|glycosyltransferase family protein 1, putative, expressed
Homoeologous triplet 51	TRIAE_CS42_1AL_TGACv1_000103_AA0003390	TRIAE_CS42_1BL_TGACv1_031891_AA0122260	TRIAE_CS42_1DL_TGACv1_062937_AA0221910	ABD	1	1	1	0.850384	0.771492	0.814147	137	257	184	6	12	11	AT5G22940.1 | Symbols: F8H | FRA8 homolog | chr5:7677197-7678892 FORWARD LENGTH=469	AT5G22940.1 | Symbols: F8H | FRA8 homolog | chr5:7677197-7678892 FORWARD LENGTH=469	AT5G22940.1 | Symbols: F8H | FRA8 homolog | chr5:7677197-7678892 FORWARD LENGTH=469	LOC_Os03g01760.1 protein|exostosin family domain containing protein, expressed, LOC_Os03g01760.2 protein|exostosin family domain containing protein, expressed	LOC_Os03g01760.1 protein|exostosin family domain containing protein, expressed, LOC_Os03g01760.2 protein|exostosin family domain containing protein, expressed	LOC_Os03g01760.1 protein|exostosin family domain containing protein, expressed, LOC_Os03g01760.2 protein|exostosin family domain containing protein, expressed
Homoeologous triplet 52	TRIAE_CS42_1AL_TGACv1_000103_AA0003420	TRIAE_CS42_1BL_TGACv1_030413_AA0089960	TRIAE_CS42_1DL_TGACv1_061148_AA0187040	ABD	1	1	1	0.707238	0.728478	0.964438	544	724	725	579	542	0	AT2G27900.1 | Symbols: | CONTAINS InterPro DOMAIN/s: Protein of unknown function DUF2451, C-terminal (InterPro:IPR019514), Vacuolar protein sorting-associated protein 54 (InterPro:IPR019515); Has 316 Blast hits to 252 proteins in 92 species: Archae - 0; Bacteria - 2; Metazoa - 200; Fungi - 2; Plants - 68; Viruses - 0; Other Eukaryotes - 44 (source: NCBI BLink). | chr2:11877654-11885238 FORWARD LE…	AT2G27900.1 | Symbols: | CONTAINS InterPro DOMAIN/s: Protein of unknown function DUF2451, C-terminal (InterPro:IPR019514), Vacuolar protein sorting-associated protein 54 (InterPro:IPR019515); Has 316 Blast hits to 252 proteins in 92 species: Archae - 0; Bacteria - 2; Metazoa - 200; Fungi - 2; Plants - 68; Viruses - 0; Other Eukaryotes - 44 (source: NCBI BLink). | chr2:11877654-11885238 FORWARD LE…	AT2G27900.1 | Symbols: | CONTAINS InterPro DOMAIN/s: Protein of unknown function DUF2451, C-terminal (InterPro:IPR019514), Vacuolar protein sorting-associated protein 54 (InterPro:IPR019515); Has 316 Blast hits to 252 proteins in 92 species: Archae - 0; Bacteria - 2; Metazoa - 200; Fungi - 2; Plants - 68; Viruses - 0; Other Eukaryotes - 44 (source: NCBI BLink). | chr2:11877654-11885238 FORWARD LE…	LOC_Os10g39910.1 protein|expressed protein	LOC_Os10g39910.1 protein|expressed protein	LOC_Os10g39910.1 protein|expressed protein
Homoeologous triplet 53	TRIAE_CS42_1AL_TGACv1_000103_AA0003380	TRIAE_CS42_1BL_TGACv1_031891_AA0122250	TRIAE_CS42_1DL_TGACv1_062937_AA0221920	ABD	1	1	1	0.556649	0.566462	0.734261	209	431	64	141	35	123	AT5G64010.1 | Symbols: | unknown protein; FUNCTIONS IN: molecular_function unknown; INVOLVED IN: biological_process unknown; LOCATED IN: cellular_component unknown; EXPRESSED IN: 23 plant structures; EXPRESSED DURING: 13 growth stages; Has 34 Blast hits to 34 proteins in 12 species: Archae - 0; Bacteria - 0; Metazoa - 0; Fungi - 0; Plants - 34; Viruses - 0; Other Eukaryotes - 0 (source: NCBI BLin…	AT5G64010.1 | Symbols: | unknown protein; FUNCTIONS IN: molecular_function unknown; INVOLVED IN: biological_process unknown; LOCATED IN: cellular_component unknown; EXPRESSED IN: 23 plant structures; EXPRESSED DURING: 13 growth stages; Has 34 Blast hits to 34 proteins in 12 species: Archae - 0; Bacteria - 0; Metazoa - 0; Fungi - 0; Plants - 34; Viruses - 0; Other Eukaryotes - 0 (source: NCBI BLin…	AT5G64010.1 | Symbols: | unknown protein; FUNCTIONS IN: molecular_function unknown; INVOLVED IN: biological_process unknown; LOCATED IN: cellular_component unknown; EXPRESSED IN: 23 plant structures; EXPRESSED DURING: 13 growth stages; Has 34 Blast hits to 34 proteins in 12 species: Archae - 0; Bacteria - 0; Metazoa - 0; Fungi - 0; Plants - 34; Viruses - 0; Other Eukaryotes - 0 (source: NCBI BLin…	No hits found	No hits found	No hits found
Homoeologous triplet 54	TRIAE_CS42_1AL_TGACv1_000103_AA0003400	TRIAE_CS42_1BL_TGACv1_031891_AA0122270	TRIAE_CS42_1DL_TGACv1_062937_AA0221900	ABD	5	5	5	0.980414	0.982499	0.995893	22	22	24	0	0	0	AT3G09925.1 | Symbols: | Pollen Ole e 1 allergen and extensin family protein | chr3:3051868-3052784 REVERSE LENGTH=171	AT3G09925.1 | Symbols: | Pollen Ole e 1 allergen and extensin family protein | chr3:3051868-3052784 REVERSE LENGTH=171	AT3G09925.1 | Symbols: | Pollen Ole e 1 allergen and extensin family protein | chr3:3051868-3052784 REVERSE LENGTH=171	LOC_Os10g39890.1 protein|POEI31 - Pollen Ole e I allergen and extensin family protein precursor, putative, expressed	LOC_Os10g39890.1 protein|POEI31 - Pollen Ole e I allergen and extensin family protein precursor, putative, expressed	LOC_Os10g39890.1 protein|POEI31 - Pollen Ole e I allergen and extensin family protein precursor, putative, expressed
Homoeologous triplet 55	TRIAE_CS42_1AL_TGACv1_000109_AA0003510	TRIAE_CS42_1BL_TGACv1_032191_AA0126570	TRIAE_CS42_1DL_TGACv1_063241_AA0225450	ABD	6	6	6	0.923879	0.918275	0.936607	555	420	495	44	21	1	AT2G41705.1 | Symbols: | camphor resistance CrcB family protein | chr2:17398083-17399910 FORWARD LENGTH=461, AT2G41705.2 | Symbols: | camphor resistance CrcB family protein | chr2:17398083-17399910 FORWARD LENGTH=461	AT2G41705.1 | Symbols: | camphor resistance CrcB family protein | chr2:17398083-17399910 FORWARD LENGTH=461, AT2G41705.2 | Symbols: | camphor resistance CrcB family protein | chr2:17398083-17399910 FORWARD LENGTH=461	AT2G41705.1 | Symbols: | camphor resistance CrcB family protein | chr2:17398083-17399910 FORWARD LENGTH=461, AT2G41705.2 | Symbols: | camphor resistance CrcB family protein | chr2:17398083-17399910 FORWARD LENGTH=461	LOC_Os10g41749.4 protein|crcB-like protein, expressed, LOC_Os10g41749.5 protein|crcB-like protein, expressed, LOC_Os10g41749.3 protein|crcB-like protein, expressed, LOC_Os10g41749.1 protein|crcB-like protein, expressed, LOC_Os10g41749.2 protein|crcB-like protein, expressed	LOC_Os10g41749.4 protein|crcB-like protein, expressed, LOC_Os10g41749.5 protein|crcB-like protein, expressed, LOC_Os10g41749.3 protein|crcB-like protein, expressed, LOC_Os10g41749.1 protein|crcB-like protein, expressed, LOC_Os10g41749.2 protein|crcB-like protein, expressed	LOC_Os10g41749.4 protein|crcB-like protein, expressed, LOC_Os10g41749.5 protein|crcB-like protein, expressed, LOC_Os10g41749.3 protein|crcB-like protein, expressed, LOC_Os10g41749.1 protein|crcB-like protein, expressed, LOC_Os10g41749.2 protein|crcB-like protein, expressed
Homoeologous triplet 56	TRIAE_CS42_1AL_TGACv1_000109_AA0003560	TRIAE_CS42_1BL_TGACv1_032469_AA0130260	TRIAE_CS42_1DL_TGACv1_062547_AA0216280	ABD	5	5	5	0.932615	0.980545	0.900939	23	17	20	0	0	1	AT5G17820.1 | Symbols: | Peroxidase superfamily protein | chr5:5888195-5890101 REVERSE LENGTH=313	AT5G17820.1 | Symbols: | Peroxidase superfamily protein | chr5:5888195-5890101 REVERSE LENGTH=313	AT5G17820.1 | Symbols: | Peroxidase superfamily protein | chr5:5888195-5890101 REVERSE LENGTH=313	LOC_Os10g41720.1 protein|peroxidase precursor, putative, expressed	LOC_Os10g41720.1 protein|peroxidase precursor, putative, expressed	LOC_Os10g41720.1 protein|peroxidase precursor, putative, expressed
Homoeologous triplet 57	TRIAE_CS42_1AL_TGACv1_000110_AA0003650	TRIAE_CS42_1BL_TGACv1_030771_AA0100400	TRIAE_CS42_1DL_TGACv1_062315_AA0212420	Not clustered	0	0	0	0.875465	0.845482	0.926495	108	359	317	224	175	19	AT5G17540.1 | Symbols: | HXXXD-type acyl-transferase family protein | chr5:5782061-5783682 REVERSE LENGTH=461	AT5G17540.1 | Symbols: | HXXXD-type acyl-transferase family protein | chr5:5782061-5783682 REVERSE LENGTH=461	AT5G17540.1 | Symbols: | HXXXD-type acyl-transferase family protein | chr5:5782061-5783682 REVERSE LENGTH=461	LOC_Os10g35950.1 protein|transferase family protein, putative, expressed	LOC_Os10g35950.1 protein|transferase family protein, putative, expressed	LOC_Os10g35950.1 protein|transferase family protein, putative, expressed
Homoeologous triplet 58	TRIAE_CS42_1AL_TGACv1_000110_AA0003630	TRIAE_CS42_1BL_TGACv1_030850_AA0102280	TRIAE_CS42_1DL_TGACv1_061157_AA0187360	ABD	2	2	2	0.945869	0.948597	0.966676	501	501	488	8	15	0	AT5G05980.1 | Symbols: ATDFB, DFB, FPGS1 | DHFS-FPGS homolog B | chr5:1799738-1804441 REVERSE LENGTH=571, AT5G05980.2 | Symbols: ATDFB, DFB, FPGS1 | DHFS-FPGS homolog B | chr5:1799738-1804177 REVERSE LENGTH=513	AT5G05980.1 | Symbols: ATDFB, DFB, FPGS1 | DHFS-FPGS homolog B | chr5:1799738-1804441 REVERSE LENGTH=571, AT5G05980.2 | Symbols: ATDFB, DFB, FPGS1 | DHFS-FPGS homolog B | chr5:1799738-1804177 REVERSE LENGTH=513	AT5G05980.1 | Symbols: ATDFB, DFB, FPGS1 | DHFS-FPGS homolog B | chr5:1799738-1804441 REVERSE LENGTH=571, AT5G05980.2 | Symbols: ATDFB, DFB, FPGS1 | DHFS-FPGS homolog B | chr5:1799738-1804177 REVERSE LENGTH=513	LOC_Os10g35940.1 protein|folylpolyglutamate synthetase, putative, expressed, LOC_Os10g35940.2 protein|folylpolyglutamate synthetase, putative, expressed	LOC_Os10g35940.1 protein|folylpolyglutamate synthetase, putative, expressed, LOC_Os10g35940.2 protein|folylpolyglutamate synthetase, putative, expressed	LOC_Os10g35940.1 protein|folylpolyglutamate synthetase, putative, expressed, LOC_Os10g35940.2 protein|folylpolyglutamate synthetase, putative, expressed
Homoeologous triplet 59	TRIAE_CS42_1AL_TGACv1_000111_AA0003680	TRIAE_CS42_1BL_TGACv1_030426_AA0090380	TRIAE_CS42_1DL_TGACv1_062764_AA0219550	BD-A	4	1	1	0.920615	0.72151	0.775843	541	430	500	80	119	39	AT3G23410.1 | Symbols: ATFAO3, FAO3 | fatty alcohol oxidase 3 | chr3:8382860-8386024 FORWARD LENGTH=746	AT3G23410.1 | Symbols: ATFAO3, FAO3 | fatty alcohol oxidase 3 | chr3:8382860-8386024 FORWARD LENGTH=746	AT3G23410.1 | Symbols: ATFAO3, FAO3 | fatty alcohol oxidase 3 | chr3:8382860-8386024 FORWARD LENGTH=746	LOC_Os10g33540.1 protein|alcohol oxidase, putative, expressed	LOC_Os10g33460.1 protein|alcohol oxidase, putative, expressed	LOC_Os10g33460.1 protein|alcohol oxidase, putative, expressed
Homoeologous triplet 60	TRIAE_CS42_1AL_TGACv1_000112_AA0003690	TRIAE_CS42_1BL_TGACv1_030747_AA0099730	TRIAE_CS42_1DL_TGACv1_063911_AA0231670	ABD	1	1	1	0.93879	0.771674	0.822729	727	727	626	0	485	289	AT3G47300.1 | Symbols: SELT | SELT-like protein precursor | chr3:17428685-17429555 REVERSE LENGTH=209	AT3G47300.1 | Symbols: SELT | SELT-like protein precursor | chr3:17428685-17429555 REVERSE LENGTH=209	AT5G58640.1 | Symbols: | Selenoprotein, Rdx type | chr5:23697996-23699505 FORWARD LENGTH=228, AT5G58640.2 | Symbols: | Selenoprotein, Rdx type | chr5:23697996-23699505 FORWARD LENGTH=227	LOC_Os05g39110.2 protein|selT-like protein precursor, putative, expressed, LOC_Os05g39110.1 protein|selT-like protein precursor, putative, expressed	LOC_Os05g39110.2 protein|selT-like protein precursor, putative, expressed, LOC_Os05g39110.1 protein|selT-like protein precursor, putative, expressed	LOC_Os05g39110.2 protein|selT-like protein precursor, putative, expressed, LOC_Os05g39110.1 protein|selT-like protein precursor, putative, expressed
Homoeologous triplet 61	TRIAE_CS42_1AL_TGACv1_000114_AA0003830	TRIAE_CS42_1BL_TGACv1_031982_AA0123780	TRIAE_CS42_1DL_TGACv1_063247_AA0225520	ABD	1	1	1	0.690479	0.746476	0.934245	281	299	371	35	51	4	AT1G63260.2 | Symbols: TET10 | tetraspanin10 | chr1:23466975-23468945 REVERSE LENGTH=258, AT1G63260.1 | Symbols: TET10 | tetraspanin10 | chr1:23467105-23468945 REVERSE LENGTH=284, AT1G63260.3 | Symbols: TET10 | tetraspanin10 | chr1:23466994-23468945 REVERSE LENGTH=277	AT1G63260.2 | Symbols: TET10 | tetraspanin10 | chr1:23466975-23468945 REVERSE LENGTH=258, AT1G63260.1 | Symbols: TET10 | tetraspanin10 | chr1:23467105-23468945 REVERSE LENGTH=284, AT1G63260.3 | Symbols: TET10 | tetraspanin10 | chr1:23466994-23468945 REVERSE LENGTH=277	AT1G63260.2 | Symbols: TET10 | tetraspanin10 | chr1:23466975-23468945 REVERSE LENGTH=258, AT1G63260.1 | Symbols: TET10 | tetraspanin10 | chr1:23467105-23468945 REVERSE LENGTH=284, AT1G63260.3 | Symbols: TET10 | tetraspanin10 | chr1:23466994-23468945 REVERSE LENGTH=277	LOC_Os10g35980.1 protein|tetraspanin family protein, putative, expressed	LOC_Os10g35980.1 protein|tetraspanin family protein, putative, expressed	LOC_Os10g35980.1 protein|tetraspanin family protein, putative, expressed
Homoeologous triplet 62	TRIAE_CS42_1AL_TGACv1_000115_AA0003860	TRIAE_CS42_1BL_TGACv1_032225_AA0127050	TRIAE_CS42_1DL_TGACv1_062477_AA0215030	ABD	1	1	1	0.932297	0.936155	0.933757	727	727	727	0	0	0	AT2G35680.1 | Symbols: | Phosphotyrosine protein phosphatases superfamily protein | chr2:14997004-14998590 REVERSE LENGTH=337	AT2G35680.1 | Symbols: | Phosphotyrosine protein phosphatases superfamily protein | chr2:14997004-14998590 REVERSE LENGTH=337	AT2G35680.1 | Symbols: | Phosphotyrosine protein phosphatases superfamily protein | chr2:14997004-14998590 REVERSE LENGTH=337	LOC_Os10g41240.1 protein|dual specificity protein phosphatase, putative, expressed, LOC_Os10g41240.2 protein|dual specificity protein phosphatase, putative, expressed	LOC_Os10g41240.1 protein|dual specificity protein phosphatase, putative, expressed, LOC_Os10g41240.2 protein|dual specificity protein phosphatase, putative, expressed	LOC_Os10g41240.1 protein|dual specificity protein phosphatase, putative, expressed, LOC_Os10g41240.2 protein|dual specificity protein phosphatase, putative, expressed
Homoeologous triplet 63	TRIAE_CS42_1AL_TGACv1_000115_AA0003870	TRIAE_CS42_1BL_TGACv1_032225_AA0127040	TRIAE_CS42_1DL_TGACv1_062477_AA0215020	ABD	4	4	4	0.86107	0.945573	0.909291	727	726	725	16	0	2	AT5G47390.1 | Symbols: | myb-like transcription factor family protein | chr5:19227001-19228546 FORWARD LENGTH=365	AT5G61620.1 | Symbols: | myb-like transcription factor family protein | chr5:24772383-24773507 FORWARD LENGTH=317	AT5G61620.1 | Symbols: | myb-like transcription factor family protein | chr5:24772383-24773507 FORWARD LENGTH=317	LOC_Os10g41260.1 protein|MYB family transcription factor, putative, expressed	LOC_Os10g41260.1 protein|MYB family transcription factor, putative, expressed	LOC_Os10g41260.1 protein|MYB family transcription factor, putative, expressed
Homoeologous triplet 64	TRIAE_CS42_1AL_TGACv1_000117_AA0003910	TRIAE_CS42_1BL_TGACv1_031980_AA0123690	TRIAE_CS42_1DL_TGACv1_064425_AA0234390	ABD	1	1	1	0.852851	0.852648	0.945538	715	725	727	1	1	0	AT2G26590.1 | Symbols: RPN13 | regulatory particle non-ATPase 13 | chr2:11311182-11314717 REVERSE LENGTH=300, AT2G26590.2 | Symbols: RPN13 | regulatory particle non-ATPase 13 | chr2:11311182-11314717 REVERSE LENGTH=300, AT2G26590.3 | Symbols: RPN13 | regulatory particle non-ATPase 13 | chr2:11311182-11314717 REVERSE LENGTH=300	AT2G26590.1 | Symbols: RPN13 | regulatory particle non-ATPase 13 | chr2:11311182-11314717 REVERSE LENGTH=300, AT2G26590.2 | Symbols: RPN13 | regulatory particle non-ATPase 13 | chr2:11311182-11314717 REVERSE LENGTH=300, AT2G26590.3 | Symbols: RPN13 | regulatory particle non-ATPase 13 | chr2:11311182-11314717 REVERSE LENGTH=300	AT2G26590.1 | Symbols: RPN13 | regulatory particle non-ATPase 13 | chr2:11311182-11314717 REVERSE LENGTH=300, AT2G26590.2 | Symbols: RPN13 | regulatory particle non-ATPase 13 | chr2:11311182-11314717 REVERSE LENGTH=300, AT2G26590.3 | Symbols: RPN13 | regulatory particle non-ATPase 13 | chr2:11311182-11314717 REVERSE LENGTH=300	LOC_Os05g51640.2 protein|adhesion regulating molecule family, putative, expressed, LOC_Os05g51640.1 protein|adhesion regulating molecule family, putative, expressed	LOC_Os05g51640.2 protein|adhesion regulating molecule family, putative, expressed, LOC_Os05g51640.1 protein|adhesion regulating molecule family, putative, expressed	LOC_Os05g51640.2 protein|adhesion regulating molecule family, putative, expressed, LOC_Os05g51640.1 protein|adhesion regulating molecule family, putative, expressed
Homoeologous triplet 65	TRIAE_CS42_1AL_TGACv1_000118_AA0003960	TRIAE_CS42_1BL_TGACv1_030274_AA0084790	TRIAE_CS42_1DL_TGACv1_061983_AA0206840	ABD	1	1	1	0.933797	0.94625	0.933991	721	717	709	0	1	0	AT4G01370.1 | Symbols: ATMPK4, MPK4 | MAP kinase 4 | chr4:567219-568889 FORWARD LENGTH=376	AT4G01370.1 | Symbols: ATMPK4, MPK4 | MAP kinase 4 | chr4:567219-568889 FORWARD LENGTH=376	AT4G01370.1 | Symbols: ATMPK4, MPK4 | MAP kinase 4 | chr4:567219-568889 FORWARD LENGTH=376	LOC_Os10g38950.1 protein|CGMC_MAPKCMGC_2_ERK.14 - CGMC includes CDA, MAPK, GSK3, and CLKC kinases, expressed	LOC_Os10g38950.1 protein|CGMC_MAPKCMGC_2_ERK.14 - CGMC includes CDA, MAPK, GSK3, and CLKC kinases, expressed	LOC_Os10g38950.1 protein|CGMC_MAPKCMGC_2_ERK.14 - CGMC includes CDA, MAPK, GSK3, and CLKC kinases, expressed
Homoeologous triplet 66	TRIAE_CS42_1AL_TGACv1_000124_AA0004070	TRIAE_CS42_1BL_TGACv1_031160_AA0108950	TRIAE_CS42_1DL_TGACv1_063618_AA0229170	ABD	3	3	3	0.806137	0.855608	0.813203	347	456	409	95	35	43	AT5G46050.1 | Symbols: ATPTR3, PTR3 | peptide transporter 3 | chr5:18675062-18679071 REVERSE LENGTH=582	AT5G46050.1 | Symbols: ATPTR3, PTR3 | peptide transporter 3 | chr5:18675062-18679071 REVERSE LENGTH=582	AT5G46050.1 | Symbols: ATPTR3, PTR3 | peptide transporter 3 | chr5:18675062-18679071 REVERSE LENGTH=582	LOC_Os10g33210.1 protein|peptide transporter PTR3-A, putative, expressed	LOC_Os10g33210.1 protein|peptide transporter PTR3-A, putative, expressed	LOC_Os10g33210.1 protein|peptide transporter PTR3-A, putative, expressed
Homoeologous triplet 67	TRIAE_CS42_1AL_TGACv1_000127_AA0004110	TRIAE_CS42_1BL_TGACv1_030517_AA0093030	TRIAE_CS42_1DL_TGACv1_062108_AA0208860	ABD	1	1	1	0.810478	0.805429	0.508983	709	715	647	1	21	102	AT5G66810.1 | Symbols: | CONTAINS InterPro DOMAIN/s: CTLH, C-terminal LisH motif (InterPro:IPR006595); BEST Arabidopsis thaliana protein match is: LisH and RanBPM domains containing protein (TAIR:AT1G61150.1); Has 333 Blast hits to 242 proteins in 88 species: Archae - 0; Bacteria - 0; Metazoa - 104; Fungi - 47; Plants - 152; Viruses - 0; Other Eukaryotes - 30 (source: NCBI BLink). | chr5:26672926…	AT5G66810.1 | Symbols: | CONTAINS InterPro DOMAIN/s: CTLH, C-terminal LisH motif (InterPro:IPR006595); BEST Arabidopsis thaliana protein match is: LisH and RanBPM domains containing protein (TAIR:AT1G61150.1); Has 333 Blast hits to 242 proteins in 88 species: Archae - 0; Bacteria - 0; Metazoa - 104; Fungi - 47; Plants - 152; Viruses - 0; Other Eukaryotes - 30 (source: NCBI BLink). | chr5:26672926…	AT5G66810.1 | Symbols: | CONTAINS InterPro DOMAIN/s: CTLH, C-terminal LisH motif (InterPro:IPR006595); BEST Arabidopsis thaliana protein match is: LisH and RanBPM domains containing protein (TAIR:AT1G61150.1); Has 333 Blast hits to 242 proteins in 88 species: Archae - 0; Bacteria - 0; Metazoa - 104; Fungi - 47; Plants - 152; Viruses - 0; Other Eukaryotes - 30 (source: NCBI BLink). | chr5:26672926…	LOC_Os10g24070.1 protein|expressed protein	LOC_Os10g24070.1 protein|expressed protein	LOC_Os10g24070.1 protein|expressed protein
Homoeologous triplet 68	TRIAE_CS42_1AL_TGACv1_000129_AA0004130	TRIAE_CS42_1BL_TGACv1_031099_AA0107600	TRIAE_CS42_1DL_TGACv1_063581_AA0228820	ABD	1	1	1	0.770047	0.304749	0.365223	142	153	167	68	156	117	AT4G18550.1 | Symbols: | alpha/beta-Hydrolases superfamily protein | chr4:10225006-10226862 REVERSE LENGTH=419	AT4G18550.1 | Symbols: | alpha/beta-Hydrolases superfamily protein | chr4:10225006-10226862 REVERSE LENGTH=419	AT4G18550.1 | Symbols: | alpha/beta-Hydrolases superfamily protein | chr4:10225006-10226862 REVERSE LENGTH=419	LOC_Os05g49840.1 protein|phospholipase, putative, expressed	LOC_Os05g49840.1 protein|phospholipase, putative, expressed	LOC_Os05g49840.1 protein|phospholipase, putative, expressed
Homoeologous triplet 69	TRIAE_CS42_1AL_TGACv1_000132_AA0004310	TRIAE_CS42_1BL_TGACv1_030654_AA0097010	TRIAE_CS42_1DL_TGACv1_061125_AA0186210	A-B-D	1	0	5	0.664739	0.663634	0.475665	727	727	727	2	8	4	AT5G08290.1 | Symbols: YLS8 | mRNA splicing factor, thioredoxin-like U5 snRNP | chr5:2666043-2666936 FORWARD LENGTH=142	AT5G08290.1 | Symbols: YLS8 | mRNA splicing factor, thioredoxin-like U5 snRNP | chr5:2666043-2666936 FORWARD LENGTH=142	AT5G08290.1 | Symbols: YLS8 | mRNA splicing factor, thioredoxin-like U5 snRNP | chr5:2666043-2666936 FORWARD LENGTH=142	LOC_Os10g34520.1 protein|mitosis protein dim1, putative, expressed	LOC_Os10g34520.1 protein|mitosis protein dim1, putative, expressed	LOC_Os10g34520.1 protein|mitosis protein dim1, putative, expressed
Homoeologous triplet 70	TRIAE_CS42_1AL_TGACv1_000132_AA0004290	TRIAE_CS42_1BL_TGACv1_030654_AA0097000	TRIAE_CS42_1DL_TGACv1_061125_AA0186220	ABD	1	1	1	0.753099	0.953701	0.749728	335	396	352	35	0	38	AT5G08415.1 | Symbols: | Radical SAM superfamily protein | chr5:2710983-2713101 REVERSE LENGTH=394	AT5G08415.1 | Symbols: | Radical SAM superfamily protein | chr5:2710983-2713101 REVERSE LENGTH=394	AT5G08415.1 | Symbols: | Radical SAM superfamily protein | chr5:2710983-2713101 REVERSE LENGTH=394	LOC_Os05g43576.1 protein|radical SAM enzyme, putative, expressed	LOC_Os05g43576.1 protein|radical SAM enzyme, putative, expressed	LOC_Os05g43576.1 protein|radical SAM enzyme, putative, expressed
Homoeologous triplet 71	TRIAE_CS42_1AL_TGACv1_000132_AA0004280	TRIAE_CS42_1BL_TGACv1_030654_AA0096990	TRIAE_CS42_1DL_TGACv1_061125_AA0186230	ABD	1	1	1	0.895319	0.9153	0.894923	710	710	699	3	9	8	AT3G22270.1 | Symbols: | Topoisomerase II-associated protein PAT1 | chr3:7874480-7877857 FORWARD LENGTH=782	AT3G22270.1 | Symbols: | Topoisomerase II-associated protein PAT1 | chr3:7874480-7877857 FORWARD LENGTH=782	AT3G22270.1 | Symbols: | Topoisomerase II-associated protein PAT1 | chr3:7874480-7877857 FORWARD LENGTH=782	LOC_Os02g31220.2 protein|expressed protein, LOC_Os02g31220.1 protein|expressed protein	LOC_Os02g31220.2 protein|expressed protein, LOC_Os02g31220.1 protein|expressed protein	LOC_Os02g31220.2 protein|expressed protein, LOC_Os02g31220.1 protein|expressed protein
Homoeologous triplet 72	TRIAE_CS42_1AL_TGACv1_000138_AA0004370	TRIAE_CS42_1BL_TGACv1_031808_AA0120970	TRIAE_CS42_1DL_TGACv1_061681_AA0201610	ABD	2	2	2	0.966003	0.989351	0.947304	695	701	701	1	4	1	AT3G18390.1 | Symbols: EMB1865 | CRS1 / YhbY (CRM) domain-containing protein | chr3:6313572-6317584 FORWARD LENGTH=848	AT3G18390.1 | Symbols: EMB1865 | CRS1 / YhbY (CRM) domain-containing protein | chr3:6313572-6317584 FORWARD LENGTH=848	AT3G18390.1 | Symbols: EMB1865 | CRS1 / YhbY (CRM) domain-containing protein | chr3:6313572-6317584 FORWARD LENGTH=848	LOC_Os05g47850.1 protein|chloroplastic group IIA intron splicing facilitator CRS1, chloroplast precursor, putative, expressed	LOC_Os05g47850.1 protein|chloroplastic group IIA intron splicing facilitator CRS1, chloroplast precursor, putative, expressed	LOC_Os05g47850.1 protein|chloroplastic group IIA intron splicing facilitator CRS1, chloroplast precursor, putative, expressed
Homoeologous triplet 73	TRIAE_CS42_1AL_TGACv1_000141_AA0004540	TRIAE_CS42_1BL_TGACv1_031633_AA0117540	TRIAE_CS42_1DL_TGACv1_064695_AA0235410	AD-B	1	2	1	0.79823	0.729325	0.646744	645	671	638	8	2	11	AT4G16060.1 | Symbols: | unknown protein; FUNCTIONS IN: molecular_function unknown; INVOLVED IN: biological_process unknown; LOCATED IN: chloroplast, chloroplast stroma; EXPRESSED IN: 22 plant structures; EXPRESSED DURING: 13 growth stages; Has 42 Blast hits to 42 proteins in 16 species: Archae - 0; Bacteria - 2; Metazoa - 0; Fungi - 0; Plants - 33; Viruses - 0; Other Eukaryotes - 7 (source: NCBI…	AT4G16060.1 | Symbols: | unknown protein; FUNCTIONS IN: molecular_function unknown; INVOLVED IN: biological_process unknown; LOCATED IN: chloroplast, chloroplast stroma; EXPRESSED IN: 22 plant structures; EXPRESSED DURING: 13 growth stages; Has 42 Blast hits to 42 proteins in 16 species: Archae - 0; Bacteria - 2; Metazoa - 0; Fungi - 0; Plants - 33; Viruses - 0; Other Eukaryotes - 7 (source: NCBI…	AT4G16060.1 | Symbols: | unknown protein; FUNCTIONS IN: molecular_function unknown; INVOLVED IN: biological_process unknown; LOCATED IN: chloroplast, chloroplast stroma; EXPRESSED IN: 22 plant structures; EXPRESSED DURING: 13 growth stages; Has 42 Blast hits to 42 proteins in 16 species: Archae - 0; Bacteria - 2; Metazoa - 0; Fungi - 0; Plants - 33; Viruses - 0; Other Eukaryotes - 7 (source: NCBI…	LOC_Os05g29020.1 protein|expressed protein	LOC_Os05g29020.1 protein|expressed protein	LOC_Os05g29020.1 protein|expressed protein
Homoeologous triplet 74	TRIAE_CS42_1AL_TGACv1_000150_AA0004780	TRIAE_CS42_1BL_TGACv1_030892_AA0103300	TRIAE_CS42_1DL_TGACv1_061117_AA0185970	ABD	6	6	6	0.986997	0.981093	0.989459	675	641	617	1	3	0	AT2G35490.1 | Symbols: | Plastid-lipid associated protein PAP / fibrillin family protein | chr2:14912309-14913797 REVERSE LENGTH=376	AT2G35490.1 | Symbols: | Plastid-lipid associated protein PAP / fibrillin family protein | chr2:14912309-14913797 REVERSE LENGTH=376	AT2G35490.1 | Symbols: | Plastid-lipid associated protein PAP / fibrillin family protein | chr2:14912309-14913797 REVERSE LENGTH=376	LOC_Os10g42500.1 protein|PAP fibrillin family domain containing protein, expressed	LOC_Os10g42500.1 protein|PAP fibrillin family domain containing protein, expressed	LOC_Os10g42500.1 protein|PAP fibrillin family domain containing protein, expressed
Homoeologous triplet 75	TRIAE_CS42_1AL_TGACv1_000150_AA0004770	TRIAE_CS42_1BL_TGACv1_030892_AA0103310	TRIAE_CS42_1DL_TGACv1_061117_AA0185960	ABD	1	1	1	0.813153	0.744511	0.843715	543	575	594	10	14	5	AT1G79190.1 | Symbols: | ARM repeat superfamily protein | chr1:29788639-29794116 FORWARD LENGTH=1335	AT1G79190.1 | Symbols: | ARM repeat superfamily protein | chr1:29788639-29794116 FORWARD LENGTH=1335	AT1G79190.1 | Symbols: | ARM repeat superfamily protein | chr1:29788639-29794116 FORWARD LENGTH=1335	LOC_Os10g42510.1 protein|expressed protein	LOC_Os10g42510.1 protein|expressed protein	LOC_Os10g42510.1 protein|expressed protein
Homoeologous triplet 76	TRIAE_CS42_1AL_TGACv1_000152_AA0004860	TRIAE_CS42_5BL_TGACv1_406579_AA1347320	TRIAE_CS42_5DL_TGACv1_435855_AA1455610	ABD	1	1	1	0.856608	0.985734	0.878684	379	391	415	12	4	16	AT1G76010.1 | Symbols: | Alba DNA/RNA-binding protein | chr1:28528505-28530488 REVERSE LENGTH=350	AT1G76010.1 | Symbols: | Alba DNA/RNA-binding protein | chr1:28528505-28530488 REVERSE LENGTH=350	AT1G76010.1 | Symbols: | Alba DNA/RNA-binding protein | chr1:28528505-28530488 REVERSE LENGTH=350	LOC_Os09g37006.2 protein|protein of unknown function domain containing protein, expressed, LOC_Os09g37006.1 protein|protein of unknown function domain containing protein, expressed	LOC_Os09g37006.2 protein|protein of unknown function domain containing protein, expressed, LOC_Os09g37006.1 protein|protein of unknown function domain containing protein, expressed	LOC_Os09g37006.2 protein|protein of unknown function domain containing protein, expressed, LOC_Os09g37006.1 protein|protein of unknown function domain containing protein, expressed
Homoeologous triplet 77	TRIAE_CS42_1AL_TGACv1_000153_AA0004910	TRIAE_CS42_1BL_TGACv1_032262_AA0127620	TRIAE_CS42_1DL_TGACv1_062962_AA0222290	ABD	3	3	3	0.804215	0.68982	0.941749	30	41	67	16	36	9	No hits found	No hits found	No hits found	LOC_Os05g30500.1 protein|expressed protein	LOC_Os05g30500.1 protein|expressed protein	LOC_Os05g30500.1 protein|expressed protein
Homoeologous triplet 78	TRIAE_CS42_1AL_TGACv1_000156_AA0004990	TRIAE_CS42_1BL_TGACv1_033155_AA0137410	TRIAE_CS42_1DL_TGACv1_061067_AA0183920	ABD	1	1	1	0.921857	0.980983	0.935411	109	95	105	84	0	30	AT2G45190.1 | Symbols: AFO, FIL, YAB1 | Plant-specific transcription factor YABBY family protein | chr2:18628450-18630552 REVERSE LENGTH=229	AT2G45190.1 | Symbols: AFO, FIL, YAB1 | Plant-specific transcription factor YABBY family protein | chr2:18628450-18630552 REVERSE LENGTH=229	AT2G45190.1 | Symbols: AFO, FIL, YAB1 | Plant-specific transcription factor YABBY family protein | chr2:18628450-18630552 REVERSE LENGTH=229	LOC_Os10g36420.1 protein|YABBY domain containing protein, putative, expressed	LOC_Os10g36420.1 protein|YABBY domain containing protein, putative, expressed	LOC_Os10g36420.1 protein|YABBY domain containing protein, putative, expressed
Homoeologous triplet 79	TRIAE_CS42_1AL_TGACv1_000165_AA0005210	TRIAE_CS42_1BL_TGACv1_030527_AA0093230	TRIAE_CS42_1DL_TGACv1_062608_AA0217170	BD-A	10	3	3	0.93624	0.959855	0.931365	688	673	646	7	4	4	AT5G48380.1 | Symbols: BIR1 | BAK1-interacting receptor-like kinase 1 | chr5:19604584-19606532 REVERSE LENGTH=620	AT5G48380.1 | Symbols: BIR1 | BAK1-interacting receptor-like kinase 1 | chr5:19604584-19606532 REVERSE LENGTH=620	AT5G48380.1 | Symbols: BIR1 | BAK1-interacting receptor-like kinase 1 | chr5:19604584-19606532 REVERSE LENGTH=620	LOC_Os05g34270.1 protein|inactive receptor kinase At1g27190 precursor, putative, expressed	LOC_Os05g34270.1 protein|inactive receptor kinase At1g27190 precursor, putative, expressed	LOC_Os05g34270.1 protein|inactive receptor kinase At1g27190 precursor, putative, expressed
Homoeologous triplet 80	TRIAE_CS42_1AL_TGACv1_000165_AA0005220	TRIAE_CS42_1BL_TGACv1_032389_AA0129260	TRIAE_CS42_1DL_TGACv1_062472_AA0214960	ABD	2	2	2	0.892404	0.967595	0.947934	554	492	535	388	16	273	AT5G14910.1 | Symbols: | Heavy metal transport/detoxification superfamily protein | chr5:4823815-4825196 FORWARD LENGTH=178	AT5G14910.1 | Symbols: | Heavy metal transport/detoxification superfamily protein | chr5:4823815-4825196 FORWARD LENGTH=178	AT5G14910.1 | Symbols: | Heavy metal transport/detoxification superfamily protein | chr5:4823815-4825196 FORWARD LENGTH=178	LOC_Os05g27100.1 protein|expressed protein	LOC_Os05g27100.1 protein|expressed protein	LOC_Os05g27100.1 protein|expressed protein
Homoeologous triplet 81	TRIAE_CS42_1AL_TGACv1_000167_AA0005240	TRIAE_CS42_1BL_TGACv1_035130_AA0146220	TRIAE_CS42_1DL_TGACv1_061221_AA0189210	A-B-D	4	3	10	0.855764	0.810579	0.889674	684	621	635	49	24	5	AT5G03380.1 | Symbols: | Heavy metal transport/detoxification superfamily protein | chr5:832400-834301 REVERSE LENGTH=392, AT5G03380.2 | Symbols: | Heavy metal transport/detoxification superfamily protein | chr5:832400-834128 REVERSE LENGTH=365	AT5G03380.1 | Symbols: | Heavy metal transport/detoxification superfamily protein | chr5:832400-834301 REVERSE LENGTH=392, AT5G03380.2 | Symbols: | Heavy metal transport/detoxification superfamily protein | chr5:832400-834128 REVERSE LENGTH=365	AT5G03380.1 | Symbols: | Heavy metal transport/detoxification superfamily protein | chr5:832400-834301 REVERSE LENGTH=392, AT5G03380.2 | Symbols: | Heavy metal transport/detoxification superfamily protein | chr5:832400-834128 REVERSE LENGTH=365	LOC_Os10g30450.1 protein|heavy-metal-associated domain-containing protein, putative, expressed	LOC_Os10g30450.1 protein|heavy-metal-associated domain-containing protein, putative, expressed	LOC_Os10g30450.1 protein|heavy-metal-associated domain-containing protein, putative, expressed
Homoeologous triplet 82	TRIAE_CS42_1AL_TGACv1_000172_AA0005350	TRIAE_CS42_1BL_TGACv1_032973_AA0135860	TRIAE_CS42_1DL_TGACv1_062564_AA0216650	ABD	1	1	1	0.846743	0.796899	0.734469	634	443	415	88	132	14	AT2G33835.1 | Symbols: FES1 | Zinc finger C-x8-C-x5-C-x3-H type family protein | chr2:14312145-14314566 REVERSE LENGTH=587	AT2G33835.1 | Symbols: FES1 | Zinc finger C-x8-C-x5-C-x3-H type family protein | chr2:14312145-14314566 REVERSE LENGTH=587	AT2G33835.1 | Symbols: FES1 | Zinc finger C-x8-C-x5-C-x3-H type family protein | chr2:14312145-14314566 REVERSE LENGTH=587	LOC_Os05g41790.1 protein|zinc finger C-x8-C-x5-C-x3-H type family protein, expressed	LOC_Os05g41790.1 protein|zinc finger C-x8-C-x5-C-x3-H type family protein, expressed	LOC_Os05g41790.1 protein|zinc finger C-x8-C-x5-C-x3-H type family protein, expressed
Homoeologous triplet 83	TRIAE_CS42_1AL_TGACv1_000178_AA0005420	TRIAE_CS42_1BL_TGACv1_033668_AA0141200	TRIAE_CS42_1DL_TGACv1_061472_AA0196260	AD-B	4	1	4	0.785089	0.804901	0.777591	265	299	412	13	33	12	AT3G16520.1 | Symbols: UGT88A1 | UDP-glucosyl transferase 88A1 | chr3:5618807-5620833 REVERSE LENGTH=451, AT3G16520.3 | Symbols: UGT88A1 | UDP-glucosyl transferase 88A1 | chr3:5619355-5620833 REVERSE LENGTH=462, AT3G16520.2 | Symbols: UGT88A1 | UDP-glucosyl transferase 88A1 | chr3:5618847-5620833 REVERSE LENGTH=446	AT3G16520.1 | Symbols: UGT88A1 | UDP-glucosyl transferase 88A1 | chr3:5618807-5620833 REVERSE LENGTH=451, AT3G16520.3 | Symbols: UGT88A1 | UDP-glucosyl transferase 88A1 | chr3:5619355-5620833 REVERSE LENGTH=462, AT3G16520.2 | Symbols: UGT88A1 | UDP-glucosyl transferase 88A1 | chr3:5618847-5620833 REVERSE LENGTH=446	AT3G16520.1 | Symbols: UGT88A1 | UDP-glucosyl transferase 88A1 | chr3:5618807-5620833 REVERSE LENGTH=451, AT3G16520.3 | Symbols: UGT88A1 | UDP-glucosyl transferase 88A1 | chr3:5619355-5620833 REVERSE LENGTH=462, AT3G16520.2 | Symbols: UGT88A1 | UDP-glucosyl transferase 88A1 | chr3:5618847-5620833 REVERSE LENGTH=446	LOC_Os05g45080.1 protein|anthocyanidin 5,3-O-glucosyltransferase, putative, expressed	LOC_Os05g45080.1 protein|anthocyanidin 5,3-O-glucosyltransferase, putative, expressed	LOC_Os05g45080.1 protein|anthocyanidin 5,3-O-glucosyltransferase, putative, expressed
Homoeologous triplet 84	TRIAE_CS42_1AL_TGACv1_000178_AA0005490	TRIAE_CS42_1BL_TGACv1_031152_AA0108740	TRIAE_CS42_1DL_TGACv1_061472_AA0196220	AB-D	1	1	15	0.728066	0.778067	0.562925	66	289	120	182	40	162	AT3G16520.1 | Symbols: UGT88A1 | UDP-glucosyl transferase 88A1 | chr3:5618807-5620833 REVERSE LENGTH=451, AT3G16520.3 | Symbols: UGT88A1 | UDP-glucosyl transferase 88A1 | chr3:5619355-5620833 REVERSE LENGTH=462, AT3G16520.2 | Symbols: UGT88A1 | UDP-glucosyl transferase 88A1 | chr3:5618847-5620833 REVERSE LENGTH=446	AT3G16520.1 | Symbols: UGT88A1 | UDP-glucosyl transferase 88A1 | chr3:5618807-5620833 REVERSE LENGTH=451, AT3G16520.3 | Symbols: UGT88A1 | UDP-glucosyl transferase 88A1 | chr3:5619355-5620833 REVERSE LENGTH=462, AT3G16520.2 | Symbols: UGT88A1 | UDP-glucosyl transferase 88A1 | chr3:5618847-5620833 REVERSE LENGTH=446	AT3G16520.1 | Symbols: UGT88A1 | UDP-glucosyl transferase 88A1 | chr3:5618807-5620833 REVERSE LENGTH=451, AT3G16520.3 | Symbols: UGT88A1 | UDP-glucosyl transferase 88A1 | chr3:5619355-5620833 REVERSE LENGTH=462, AT3G16520.2 | Symbols: UGT88A1 | UDP-glucosyl transferase 88A1 | chr3:5618847-5620833 REVERSE LENGTH=446	LOC_Os05g45180.1 protein|anthocyanidin 5,3-O-glucosyltransferase, putative, expressed	LOC_Os05g45180.1 protein|anthocyanidin 5,3-O-glucosyltransferase, putative, expressed	LOC_Os05g45180.1 protein|anthocyanidin 5,3-O-glucosyltransferase, putative, expressed
Homoeologous triplet 85	TRIAE_CS42_1AL_TGACv1_000182_AA0005550	TRIAE_CS42_1BL_TGACv1_030773_AA0100480	TRIAE_CS42_1DL_TGACv1_062294_AA0211970	ABD	1	1	1	0.952771	0.910715	0.914182	169	175	114	1	2	1	AT3G05330.1 | Symbols: ATN, ATTAN | cyclin family | chr3:1519162-1521159 REVERSE LENGTH=444	AT3G05330.1 | Symbols: ATN, ATTAN | cyclin family | chr3:1519162-1521159 REVERSE LENGTH=444	AT3G05330.1 | Symbols: ATN, ATTAN | cyclin family | chr3:1519162-1521159 REVERSE LENGTH=444	LOC_Os02g26140.1 protein|microtubule-binding protein TANGLED1, putative, expressed	LOC_Os02g26140.1 protein|microtubule-binding protein TANGLED1, putative, expressed	LOC_Os02g26140.1 protein|microtubule-binding protein TANGLED1, putative, expressed
Homoeologous triplet 86	TRIAE_CS42_1AL_TGACv1_000188_AA0005650	TRIAE_CS42_1BL_TGACv1_030620_AA0096020	TRIAE_CS42_1DL_TGACv1_061572_AA0198860	ABD	7	7	7	0.940991	0.963682	0.945084	278	222	396	21	73	115	AT3G06880.1 | Symbols: | Transducin/WD40 repeat-like superfamily protein | chr3:2169899-2175686 REVERSE LENGTH=1261, AT3G06880.2 | Symbols: | Transducin/WD40 repeat-like superfamily protein | chr3:2170516-2175686 REVERSE LENGTH=1264	AT3G06880.1 | Symbols: | Transducin/WD40 repeat-like superfamily protein | chr3:2169899-2175686 REVERSE LENGTH=1261, AT3G06880.2 | Symbols: | Transducin/WD40 repeat-like superfamily protein | chr3:2170516-2175686 REVERSE LENGTH=1264	AT3G06880.1 | Symbols: | Transducin/WD40 repeat-like superfamily protein | chr3:2169899-2175686 REVERSE LENGTH=1261, AT3G06880.2 | Symbols: | Transducin/WD40 repeat-like superfamily protein | chr3:2170516-2175686 REVERSE LENGTH=1264	LOC_Os05g30010.1 protein|WD domain, G-beta repeat domain containing protein, expressed	LOC_Os05g30010.1 protein|WD domain, G-beta repeat domain containing protein, expressed	LOC_Os05g30010.1 protein|WD domain, G-beta repeat domain containing protein, expressed
Homoeologous triplet 87	TRIAE_CS42_1AL_TGACv1_000188_AA0005690	TRIAE_CS42_1BL_TGACv1_030321_AA0086650	TRIAE_CS42_1DL_TGACv1_061290_AA0191430	ABD	1	1	1	0.868761	0.908388	0.903845	684	678	711	0	0	0	AT3G57340.1 | Symbols: | Heat shock protein DnaJ, N-terminal with domain of unknown function (DUF1977) | chr3:21219175-21220278 FORWARD LENGTH=367, AT3G57340.2 | Symbols: | Heat shock protein DnaJ, N-terminal with domain of unknown function (DUF1977) | chr3:21219175-21220278 FORWARD LENGTH=367	AT3G57340.1 | Symbols: | Heat shock protein DnaJ, N-terminal with domain of unknown function (DUF1977) | chr3:21219175-21220278 FORWARD LENGTH=367, AT3G57340.2 | Symbols: | Heat shock protein DnaJ, N-terminal with domain of unknown function (DUF1977) | chr3:21219175-21220278 FORWARD LENGTH=367	AT3G57340.1 | Symbols: | Heat shock protein DnaJ, N-terminal with domain of unknown function (DUF1977) | chr3:21219175-21220278 FORWARD LENGTH=367, AT3G57340.2 | Symbols: | Heat shock protein DnaJ, N-terminal with domain of unknown function (DUF1977) | chr3:21219175-21220278 FORWARD LENGTH=367	LOC_Os05g30130.1 protein|chaperone protein dnaJ 49, putative, expressed	LOC_Os05g30130.1 protein|chaperone protein dnaJ 49, putative, expressed	LOC_Os05g30130.1 protein|chaperone protein dnaJ 49, putative, expressed
Homoeologous triplet 88	TRIAE_CS42_1AL_TGACv1_000188_AA0005670	TRIAE_CS42_1BL_TGACv1_030620_AA0095990	TRIAE_CS42_1DL_TGACv1_061572_AA0198870	ABD	1	1	1	0.855929	0.804463	0.877937	602	552	602	5	2	4	AT3G62810.1 | Symbols: | complex 1 family protein / LVR family protein | chr3:23227763-23228180 FORWARD LENGTH=106	AT3G62810.1 | Symbols: | complex 1 family protein / LVR family protein | chr3:23227763-23228180 FORWARD LENGTH=106	AT3G62810.1 | Symbols: | complex 1 family protein / LVR family protein | chr3:23227763-23228180 FORWARD LENGTH=106	LOC_Os05g30030.1 protein|expressed protein	LOC_Os05g30030.1 protein|expressed protein	LOC_Os05g30030.1 protein|expressed protein
Homoeologous triplet 89	TRIAE_CS42_1AL_TGACv1_000189_AA0005740	TRIAE_CS42_1BL_TGACv1_031508_AA0115230	TRIAE_CS42_1DL_TGACv1_061588_AA0199220	Not clustered	0	1	0	0.838499	0.904145	0.898075	466	532	537	37	20	2	AT5G03530.1 | Symbols: ATRAB ALPHA, ATRAB, ATRAB18B, ATRABC2A, RABC2A | RAB GTPase homolog C2A | chr5:885741-887061 REVERSE LENGTH=210	AT5G03530.1 | Symbols: ATRAB ALPHA, ATRAB, ATRAB18B, ATRABC2A, RABC2A | RAB GTPase homolog C2A | chr5:885741-887061 REVERSE LENGTH=210	AT5G03530.1 | Symbols: ATRAB ALPHA, ATRAB, ATRAB18B, ATRABC2A, RABC2A | RAB GTPase homolog C2A | chr5:885741-887061 REVERSE LENGTH=210	LOC_Os10g31830.1 protein|ras-related protein, putative, expressed	LOC_Os10g31830.1 protein|ras-related protein, putative, expressed	LOC_Os10g31830.1 protein|ras-related protein, putative, expressed
Homoeologous triplet 90	TRIAE_CS42_1AL_TGACv1_000192_AA0005780	TRIAE_CS42_1BL_TGACv1_030262_AA0084300	TRIAE_CS42_1DL_TGACv1_061755_AA0202900	ABD	4	4	4	0.873901	0.937252	0.865259	633	663	530	20	97	84	AT3G54000.2 | Symbols: | unknown protein; Has 35333 Blast hits to 34131 proteins in 2444 species: Archae - 798; Bacteria - 22429; Metazoa - 974; Fungi - 991; Plants - 531; Viruses - 0; Other Eukaryotes - 9610 (source: NCBI BLink). | chr3:19996757-19997858 FORWARD LENGTH=301, AT3G54000.3 | Symbols: | unknown protein; Has 35333 Blast hits to 34131 proteins in 2444 species: Archae - 798; Bacteria - …	AT3G54000.2 | Symbols: | unknown protein; Has 35333 Blast hits to 34131 proteins in 2444 species: Archae - 798; Bacteria - 22429; Metazoa - 974; Fungi - 991; Plants - 531; Viruses - 0; Other Eukaryotes - 9610 (source: NCBI BLink). | chr3:19996757-19997858 FORWARD LENGTH=301, AT3G54000.3 | Symbols: | unknown protein; Has 35333 Blast hits to 34131 proteins in 2444 species: Archae - 798; Bacteria - …	AT3G54000.2 | Symbols: | unknown protein; Has 35333 Blast hits to 34131 proteins in 2444 species: Archae - 798; Bacteria - 22429; Metazoa - 974; Fungi - 991; Plants - 531; Viruses - 0; Other Eukaryotes - 9610 (source: NCBI BLink). | chr3:19996757-19997858 FORWARD LENGTH=301, AT3G54000.3 | Symbols: | unknown protein; Has 35333 Blast hits to 34131 proteins in 2444 species: Archae - 798; Bacteria - …	LOC_Os05g37930.3 protein|expressed protein, LOC_Os05g37930.2 protein|expressed protein, LOC_Os05g37930.1 protein|expressed protein	LOC_Os05g37930.3 protein|expressed protein, LOC_Os05g37930.2 protein|expressed protein, LOC_Os05g37930.1 protein|expressed protein	LOC_Os05g37930.3 protein|expressed protein, LOC_Os05g37930.2 protein|expressed protein, LOC_Os05g37930.1 protein|expressed protein
Homoeologous triplet 91	TRIAE_CS42_1AL_TGACv1_000196_AA0005820	TRIAE_CS42_1BL_TGACv1_030861_AA0102470	TRIAE_CS42_1DL_TGACv1_063517_AA0228160	ABD	1	1	1	0.953959	0.921309	0.906383	114	146	182	2	6	6	AT5G11550.1 | Symbols: | ARM repeat superfamily protein | chr5:3708203-3709147 REVERSE LENGTH=314	AT5G11550.1 | Symbols: | ARM repeat superfamily protein | chr5:3708203-3709147 REVERSE LENGTH=314	AT5G11550.1 | Symbols: | ARM repeat superfamily protein | chr5:3708203-3709147 REVERSE LENGTH=314	LOC_Os05g48580.1 protein|expressed protein	LOC_Os05g48580.1 protein|expressed protein	LOC_Os05g48580.1 protein|expressed protein
Homoeologous triplet 92	TRIAE_CS42_1AL_TGACv1_000199_AA0005900	TRIAE_CS42_1BL_TGACv1_030284_AA0085310	TRIAE_CS42_1DL_TGACv1_064130_AA0232750	ABD	1	1	1	0.922097	0.872226	0.869488	727	727	705	0	27	27	AT5G44180.1 | Symbols: | Homeodomain-like transcriptional regulator | chr5:17783172-17789872 FORWARD LENGTH=1694, AT5G44180.2 | Symbols: | Homeodomain-like transcriptional regulator | chr5:17783172-17789872 FORWARD LENGTH=1507	AT5G44180.1 | Symbols: | Homeodomain-like transcriptional regulator | chr5:17783172-17789872 FORWARD LENGTH=1694, AT5G44180.2 | Symbols: | Homeodomain-like transcriptional regulator | chr5:17783172-17789872 FORWARD LENGTH=1507	AT5G44180.1 | Symbols: | Homeodomain-like transcriptional regulator | chr5:17783172-17789872 FORWARD LENGTH=1694, AT5G44180.2 | Symbols: | Homeodomain-like transcriptional regulator | chr5:17783172-17789872 FORWARD LENGTH=1507	LOC_Os05g48820.1 protein|DDT, putative, expressed	LOC_Os05g48820.1 protein|DDT, putative, expressed	LOC_Os05g48820.1 protein|DDT, putative, expressed
Homoeologous triplet 93	TRIAE_CS42_1AL_TGACv1_000201_AA0005940	TRIAE_CS42_1BL_TGACv1_031138_AA0108470	TRIAE_CS42_1DL_TGACv1_061805_AA0203610	ABD	1	1	1	0.922382	0.917015	0.858225	727	725	727	2	0	60	AT1G54450.1 | Symbols: | Calcium-binding EF-hand family protein | chr1:20336570-20339535 REVERSE LENGTH=535	AT1G54450.1 | Symbols: | Calcium-binding EF-hand family protein | chr1:20336570-20339535 REVERSE LENGTH=535	AT5G28900.1 | Symbols: | Calcium-binding EF-hand family protein | chr5:10925852-10929892 FORWARD LENGTH=536	LOC_Os10g33680.1 protein|serine/threonine-protein phosphatase 2A regulatory subunit B subunitbeta, putative, expressed	LOC_Os10g33680.1 protein|serine/threonine-protein phosphatase 2A regulatory subunit B subunitbeta, putative, expressed	LOC_Os10g33680.1 protein|serine/threonine-protein phosphatase 2A regulatory subunit B subunitbeta, putative, expressed
Homoeologous triplet 94	TRIAE_CS42_1AL_TGACv1_000202_AA0005980	TRIAE_CS42_1BL_TGACv1_030970_AA0104750	TRIAE_CS42_1DL_TGACv1_063794_AA0230830	ABD	2	2	2	0.973918	0.966637	0.937825	560	586	621	11	29	15	AT4G15545.1 | Symbols: | unknown protein; BEST Arabidopsis thaliana protein match is: unknown protein (TAIR:AT1G16520.1); Has 30201 Blast hits to 17322 proteins in 780 species: Archae - 12; Bacteria - 1396; Metazoa - 17338; Fungi - 3422; Plants - 5037; Viruses - 0; Other Eukaryotes - 2996 (source: NCBI BLink). | chr4:8875932-8877567 FORWARD LENGTH=337	AT4G15545.1 | Symbols: | unknown protein; BEST Arabidopsis thaliana protein match is: unknown protein (TAIR:AT1G16520.1); Has 30201 Blast hits to 17322 proteins in 780 species: Archae - 12; Bacteria - 1396; Metazoa - 17338; Fungi - 3422; Plants - 5037; Viruses - 0; Other Eukaryotes - 2996 (source: NCBI BLink). | chr4:8875932-8877567 FORWARD LENGTH=337	AT4G15545.1 | Symbols: | unknown protein; BEST Arabidopsis thaliana protein match is: unknown protein (TAIR:AT1G16520.1); Has 30201 Blast hits to 17322 proteins in 780 species: Archae - 12; Bacteria - 1396; Metazoa - 17338; Fungi - 3422; Plants - 5037; Viruses - 0; Other Eukaryotes - 2996 (source: NCBI BLink). | chr4:8875932-8877567 FORWARD LENGTH=337	LOC_Os05g33620.1 protein|expressed protein	LOC_Os05g33620.1 protein|expressed protein	LOC_Os05g33620.1 protein|expressed protein
Homoeologous triplet 95	TRIAE_CS42_1AL_TGACv1_000202_AA0005950	TRIAE_CS42_1BL_TGACv1_031582_AA0116440	TRIAE_CS42_1DL_TGACv1_063794_AA0230840	AB-D	1	1	9	0.895178	0.940163	0.820343	727	727	727	0	0	2	AT1G54710.1 | Symbols: ATATG18H, ATG18H | homolog of yeast autophagy 18 (ATG18) H | chr1:20417019-20420733 REVERSE LENGTH=927	AT1G54710.1 | Symbols: ATATG18H, ATG18H | homolog of yeast autophagy 18 (ATG18) H | chr1:20417019-20420733 REVERSE LENGTH=927	AT1G54710.1 | Symbols: ATATG18H, ATG18H | homolog of yeast autophagy 18 (ATG18) H | chr1:20417019-20420733 REVERSE LENGTH=927	LOC_Os05g33610.1 protein|expressed protein, LOC_Os05g33610.2 protein|expressed protein, LOC_Os05g33610.3 protein|expressed protein	LOC_Os05g33610.1 protein|expressed protein, LOC_Os05g33610.2 protein|expressed protein, LOC_Os05g33610.3 protein|expressed protein	LOC_Os05g33610.1 protein|expressed protein, LOC_Os05g33610.2 protein|expressed protein, LOC_Os05g33610.3 protein|expressed protein
Homoeologous triplet 96	TRIAE_CS42_1AL_TGACv1_000208_AA0006160	TRIAE_CS42_1BL_TGACv1_030355_AA0087860	TRIAE_CS42_1DL_TGACv1_063465_AA0227570	A-B-D	3	5	6	0.921293	0.924004	0.901118	241	254	304	5	17	12	AT2G38640.1 | Symbols: | Protein of unknown function (DUF567) | chr2:16157725-16158474 REVERSE LENGTH=196	AT2G38640.1 | Symbols: | Protein of unknown function (DUF567) | chr2:16157725-16158474 REVERSE LENGTH=196	AT2G38640.1 | Symbols: | Protein of unknown function (DUF567) | chr2:16157725-16158474 REVERSE LENGTH=196	LOC_Os05g40630.1 protein|DUF567 domain containing protein, putative, expressed	LOC_Os05g40630.1 protein|DUF567 domain containing protein, putative, expressed	LOC_Os05g40630.1 protein|DUF567 domain containing protein, putative, expressed
Homoeologous triplet 97	TRIAE_CS42_1AL_TGACv1_000218_AA0006440	TRIAE_CS42_1BL_TGACv1_030791_AA0100860	TRIAE_CS42_1DL_TGACv1_061162_AA0187580	AB-D	3	3	9	0.961078	0.903794	0.905598	434	343	81	26	307	127	AT4G19210.1 | Symbols: ATRLI2, RLI2 | RNAse l inhibitor protein 2 | chr4:10501906-10504776 FORWARD LENGTH=605	AT4G19210.1 | Symbols: ATRLI2, RLI2 | RNAse l inhibitor protein 2 | chr4:10501906-10504776 FORWARD LENGTH=605	AT4G19210.1 | Symbols: ATRLI2, RLI2 | RNAse l inhibitor protein 2 | chr4:10501906-10504776 FORWARD LENGTH=605	LOC_Os11g34350.1 protein|ATP-binding cassette sub-family E member 1, putative, expressed	LOC_Os11g34350.1 protein|ATP-binding cassette sub-family E member 1, putative, expressed	LOC_Os11g34350.1 protein|ATP-binding cassette sub-family E member 1, putative, expressed
Homoeologous triplet 98	TRIAE_CS42_1AL_TGACv1_000218_AA0006450	TRIAE_CS42_1BL_TGACv1_030791_AA0100870	TRIAE_CS42_1DL_TGACv1_061162_AA0187570	ABD	1	1	1	0.842053	0.932525	0.869855	160	178	152	8	3	7	AT2G44830.1 | Symbols: | Protein kinase superfamily protein | chr2:18490398-18492779 FORWARD LENGTH=765	AT2G44830.1 | Symbols: | Protein kinase superfamily protein | chr2:18490398-18492779 FORWARD LENGTH=765	AT2G44830.1 | Symbols: | Protein kinase superfamily protein | chr2:18490398-18492779 FORWARD LENGTH=765	LOC_Os10g41290.1 protein|AGC_PVPK_like_kin82y.17 - ACG kinases include homologs to PKA, PKG and PKC, expressed	LOC_Os10g41290.1 protein|AGC_PVPK_like_kin82y.17 - ACG kinases include homologs to PKA, PKG and PKC, expressed	LOC_Os10g41290.1 protein|AGC_PVPK_like_kin82y.17 - ACG kinases include homologs to PKA, PKG and PKC, expressed
Homoeologous triplet 99	TRIAE_CS42_1AL_TGACv1_000219_AA0006470	TRIAE_CS42_1BL_TGACv1_034666_AA0145220	TRIAE_CS42_1DL_TGACv1_061141_AA0186710	ABD	1	1	1	0.893005	0.938618	0.936612	366	296	314	86	27	11	AT5G26230.1 | Symbols: | unknown protein; FUNCTIONS IN: molecular_function unknown; INVOLVED IN: biological_process unknown; LOCATED IN: chloroplast; EXPRESSED IN: 22 plant structures; EXPRESSED DURING: 13 growth stages; Has 1807 Blast hits to 1807 proteins in 277 species: Archae - 0; Bacteria - 0; Metazoa - 736; Fungi - 347; Plants - 385; Viruses - 0; Other Eukaryotes - 339 (source: NCBI BLink).…	AT5G26230.1 | Symbols: | unknown protein; FUNCTIONS IN: molecular_function unknown; INVOLVED IN: biological_process unknown; LOCATED IN: chloroplast; EXPRESSED IN: 22 plant structures; EXPRESSED DURING: 13 growth stages; Has 1807 Blast hits to 1807 proteins in 277 species: Archae - 0; Bacteria - 0; Metazoa - 736; Fungi - 347; Plants - 385; Viruses - 0; Other Eukaryotes - 339 (source: NCBI BLink).…	AT5G26230.1 | Symbols: | unknown protein; FUNCTIONS IN: molecular_function unknown; INVOLVED IN: biological_process unknown; LOCATED IN: chloroplast; EXPRESSED IN: 22 plant structures; EXPRESSED DURING: 13 growth stages; Has 1807 Blast hits to 1807 proteins in 277 species: Archae - 0; Bacteria - 0; Metazoa - 736; Fungi - 347; Plants - 385; Viruses - 0; Other Eukaryotes - 339 (source: NCBI BLink).…	LOC_Os05g32440.1 protein|expressed protein	LOC_Os05g32440.1 protein|expressed protein	LOC_Os05g32440.1 protein|expressed protein
Homoeologous triplet 100	TRIAE_CS42_1AL_TGACv1_000220_AA0006540	TRIAE_CS42_1BL_TGACv1_030671_AA0097540	TRIAE_CS42_1DL_TGACv1_061624_AA0200280	ABD	1	1	1	0.873724	0.828393	0.84507	224	279	265	1	0	0	AT5G23130.1 | Symbols: | Peptidoglycan-binding LysM domain-containing protein | chr5:7781475-7783333 FORWARD LENGTH=397	AT5G23130.1 | Symbols: | Peptidoglycan-binding LysM domain-containing protein | chr5:7781475-7783333 FORWARD LENGTH=397	AT5G23130.1 | Symbols: | Peptidoglycan-binding LysM domain-containing protein | chr5:7781475-7783333 FORWARD LENGTH=397	LOC_Os10g34420.1 protein|lysM domain containing protein, putative, expressed	LOC_Os10g34420.1 protein|lysM domain containing protein, putative, expressed	LOC_Os10g34420.1 protein|lysM domain containing protein, putative, expressed
Homoeologous triplet 101	TRIAE_CS42_1AL_TGACv1_000222_AA0006620	TRIAE_CS42_1BL_TGACv1_031655_AA0118030	TRIAE_CS42_1DL_TGACv1_061705_AA0202020	ABD	1	1	1	0.873324	0.916981	0.900975	551	499	596	2	0	4	AT5G12290.1 | Symbols: DGS1 | dgd1 suppressor 1 | chr5:3974374-3978066 REVERSE LENGTH=602	AT5G12290.1 | Symbols: DGS1 | dgd1 suppressor 1 | chr5:3974374-3978066 REVERSE LENGTH=602	AT5G12290.1 | Symbols: DGS1 | dgd1 suppressor 1 | chr5:3974374-3978066 REVERSE LENGTH=602	LOC_Os03g26030.1 protein|expressed protein	LOC_Os03g26030.1 protein|expressed protein	LOC_Os03g26030.1 protein|expressed protein
Homoeologous triplet 102	TRIAE_CS42_1AL_TGACv1_000222_AA0006610	TRIAE_CS42_1BL_TGACv1_031655_AA0118060	TRIAE_CS42_1DL_TGACv1_061705_AA0202010	ABD	3	3	3	0.501456	0.959983	0.42801	723	570	715	478	80	165	AT2G03820.1 | Symbols: | nonsense-mediated mRNA decay NMD3 family protein | chr2:1165149-1166699 REVERSE LENGTH=516	AT2G03820.1 | Symbols: | nonsense-mediated mRNA decay NMD3 family protein | chr2:1165149-1166699 REVERSE LENGTH=516	AT2G03820.1 | Symbols: | nonsense-mediated mRNA decay NMD3 family protein | chr2:1165149-1166699 REVERSE LENGTH=516	LOC_Os10g42320.1 protein|nonsense-mediated mRNA decay protein 3, putative, expressed	LOC_Os10g42320.1 protein|nonsense-mediated mRNA decay protein 3, putative, expressed	LOC_Os10g42320.1 protein|nonsense-mediated mRNA decay protein 3, putative, expressed
Homoeologous triplet 103	TRIAE_CS42_1AL_TGACv1_000227_AA0006690	TRIAE_CS42_1BL_TGACv1_032429_AA0129780	TRIAE_CS42_1DL_TGACv1_061496_AA0196880	ABD	1	1	1	0.936767	0.932244	0.947749	727	727	727	0	0	0	AT1G63800.1 | Symbols: UBC5 | ubiquitin-conjugating enzyme 5 | chr1:23667888-23669003 REVERSE LENGTH=185	AT1G63800.1 | Symbols: UBC5 | ubiquitin-conjugating enzyme 5 | chr1:23667888-23669003 REVERSE LENGTH=185	AT1G63800.1 | Symbols: UBC5 | ubiquitin-conjugating enzyme 5 | chr1:23667888-23669003 REVERSE LENGTH=185	LOC_Os10g31000.1 protein|ubiquitin-conjugating enzyme, putative, expressed, LOC_Os10g31000.2 protein|ubiquitin-conjugating enzyme, putative, expressed	LOC_Os10g31000.1 protein|ubiquitin-conjugating enzyme, putative, expressed, LOC_Os10g31000.2 protein|ubiquitin-conjugating enzyme, putative, expressed	LOC_Os10g31000.1 protein|ubiquitin-conjugating enzyme, putative, expressed, LOC_Os10g31000.2 protein|ubiquitin-conjugating enzyme, putative, expressed
Homoeologous triplet 104	TRIAE_CS42_1AL_TGACv1_000229_AA0006730	TRIAE_CS42_1BL_TGACv1_033362_AA0138950	TRIAE_CS42_1DL_TGACv1_061847_AA0204240	BD-A	0	2	2	0.458184	0.529087	0.674541	21	14	14	10	11	6	AT1G78440.1 | Symbols: ATGA2OX1, GA2OX1 | Arabidopsis thaliana gibberellin 2-oxidase 1 | chr1:29511772-29512990 REVERSE LENGTH=329	AT1G78440.1 | Symbols: ATGA2OX1, GA2OX1 | Arabidopsis thaliana gibberellin 2-oxidase 1 | chr1:29511772-29512990 REVERSE LENGTH=329	AT1G78440.1 | Symbols: ATGA2OX1, GA2OX1 | Arabidopsis thaliana gibberellin 2-oxidase 1 | chr1:29511772-29512990 REVERSE LENGTH=329	LOC_Os05g43880.1 protein|gibberellin 2-beta-dioxygenase, putative, expressed	LOC_Os05g43880.1 protein|gibberellin 2-beta-dioxygenase, putative, expressed	LOC_Os05g43880.1 protein|gibberellin 2-beta-dioxygenase, putative, expressed
Homoeologous triplet 105	TRIAE_CS42_1AL_TGACv1_000230_AA0006760	TRIAE_CS42_1BL_TGACv1_030696_AA0098140	TRIAE_CS42_1DL_TGACv1_063174_AA0224630	ABD	1	1	1	0.871948	0.937326	0.92697	726	727	722	0	8	0	AT5G13530.1 | Symbols: KEG | protein kinases;ubiquitin-protein ligases | chr5:4345618-4354369 FORWARD LENGTH=1625, AT5G13530.2 | Symbols: KEG | protein kinases;ubiquitin-protein ligases | chr5:4345618-4354369 FORWARD LENGTH=1624	AT5G13530.1 | Symbols: KEG | protein kinases;ubiquitin-protein ligases | chr5:4345618-4354369 FORWARD LENGTH=1625, AT5G13530.2 | Symbols: KEG | protein kinases;ubiquitin-protein ligases | chr5:4345618-4354369 FORWARD LENGTH=1624	AT5G13530.1 | Symbols: KEG | protein kinases;ubiquitin-protein ligases | chr5:4345618-4354369 FORWARD LENGTH=1625, AT5G13530.2 | Symbols: KEG | protein kinases;ubiquitin-protein ligases | chr5:4345618-4354369 FORWARD LENGTH=1624	LOC_Os05g32570.1 protein|RING E3 ligase protein, putative, expressed	LOC_Os05g32570.1 protein|RING E3 ligase protein, putative, expressed	LOC_Os05g32570.1 protein|RING E3 ligase protein, putative, expressed
Homoeologous triplet 106	TRIAE_CS42_1AL_TGACv1_000230_AA0006770	TRIAE_CS42_1BL_TGACv1_031018_AA0105880	TRIAE_CS42_1DL_TGACv1_062778_AA0219730	ABD	5	5	5	0.90579	0.877424	0.909188	569	437	452	14	10	5	AT2G41640.1 | Symbols: | Glycosyltransferase family 61 protein | chr2:17360654-17362391 FORWARD LENGTH=500, AT2G41640.2 | Symbols: | Glycosyltransferase family 61 protein | chr2:17360654-17362939 FORWARD LENGTH=492	AT2G41640.1 | Symbols: | Glycosyltransferase family 61 protein | chr2:17360654-17362391 FORWARD LENGTH=500, AT2G41640.2 | Symbols: | Glycosyltransferase family 61 protein | chr2:17360654-17362939 FORWARD LENGTH=492	AT2G41640.1 | Symbols: | Glycosyltransferase family 61 protein | chr2:17360654-17362391 FORWARD LENGTH=500, AT2G41640.2 | Symbols: | Glycosyltransferase family 61 protein | chr2:17360654-17362939 FORWARD LENGTH=492	LOC_Os05g32544.1 protein|glycosyltransferase, putative, expressed, LOC_Os05g32544.2 protein|glycosyltransferase, putative, expressed	LOC_Os05g32544.1 protein|glycosyltransferase, putative, expressed, LOC_Os05g32544.2 protein|glycosyltransferase, putative, expressed	LOC_Os05g32544.1 protein|glycosyltransferase, putative, expressed, LOC_Os05g32544.2 protein|glycosyltransferase, putative, expressed
Homoeologous triplet 107	TRIAE_CS42_1AL_TGACv1_000232_AA0006790	TRIAE_CS42_1BL_TGACv1_031315_AA0111470	TRIAE_CS42_1DL_TGACv1_061298_AA0191700	A-B-D	0	9	15	0.799187	0.88527	0.747212	381	360	377	6	4	13	AT3G18710.1 | Symbols: PUB29, ATPUB29 | plant U-box 29 | chr3:6434234-6435481 REVERSE LENGTH=415	AT3G18710.1 | Symbols: PUB29, ATPUB29 | plant U-box 29 | chr3:6434234-6435481 REVERSE LENGTH=415	AT3G18710.1 | Symbols: PUB29, ATPUB29 | plant U-box 29 | chr3:6434234-6435481 REVERSE LENGTH=415	LOC_Os05g36360.1 protein|U-box domain containing protein, expressed	LOC_Os05g36360.1 protein|U-box domain containing protein, expressed	LOC_Os05g36360.1 protein|U-box domain containing protein, expressed
Homoeologous triplet 108	TRIAE_CS42_1AL_TGACv1_000234_AA0006830	TRIAE_CS42_1BL_TGACv1_030648_AA0096850	TRIAE_CS42_1DL_TGACv1_061511_AA0197330	ABD	1	1	1	0.778801	0.713343	0.799089	576	708	684	149	117	9	AT2G43400.1 | Symbols: ETFQO | electron-transfer flavoprotein:ubiquinone oxidoreductase | chr2:18021304-18025041 FORWARD LENGTH=633	AT2G43400.1 | Symbols: ETFQO | electron-transfer flavoprotein:ubiquinone oxidoreductase | chr2:18021304-18025041 FORWARD LENGTH=633	AT2G43400.1 | Symbols: ETFQO | electron-transfer flavoprotein:ubiquinone oxidoreductase | chr2:18021304-18025041 FORWARD LENGTH=633	LOC_Os10g37210.1 protein|FAD dependent oxidoreductase domain containing protein, expressed	LOC_Os10g37210.1 protein|FAD dependent oxidoreductase domain containing protein, expressed	LOC_Os10g37210.1 protein|FAD dependent oxidoreductase domain containing protein, expressed
Homoeologous triplet 109	TRIAE_CS42_1AL_TGACv1_000237_AA0006940	TRIAE_CS42_1BL_TGACv1_030694_AA0098060	TRIAE_CS42_1DL_TGACv1_061092_AA0184780	AD-B	3	15	3	0.521825	0.882182	0.683547	168	113	174	65	29	50	AT1G21460.1 | Symbols: SWEET1, AtSWEET1 | Nodulin MtN3 family protein | chr1:7512030-7513281 REVERSE LENGTH=247	AT1G21460.1 | Symbols: SWEET1, AtSWEET1 | Nodulin MtN3 family protein | chr1:7512030-7513281 REVERSE LENGTH=247	AT1G21460.1 | Symbols: SWEET1, AtSWEET1 | Nodulin MtN3 family protein | chr1:7512030-7513281 REVERSE LENGTH=247	LOC_Os05g35140.1 protein|nodulin MtN3 family protein, putative, expressed	LOC_Os05g35140.1 protein|nodulin MtN3 family protein, putative, expressed	LOC_Os05g35140.1 protein|nodulin MtN3 family protein, putative, expressed
Homoeologous triplet 110	TRIAE_CS42_1AL_TGACv1_000238_AA0006980	TRIAE_CS42_1BL_TGACv1_032290_AA0128050	TRIAE_CS42_1DL_TGACv1_061943_AA0206070	ABD	1	1	1	0.826751	0.865899	0.809304	726	656	725	101	5	44	AT3G04490.1 | Symbols: | unknown protein; BEST Arabidopsis thaliana protein match is: unknown protein (TAIR:AT4G38092.1); Has 75 Blast hits to 64 proteins in 20 species: Archae - 0; Bacteria - 0; Metazoa - 36; Fungi - 0; Plants - 22; Viruses - 0; Other Eukaryotes - 17 (source: NCBI BLink). | chr3:1200816-1209713 FORWARD LENGTH=1118	AT3G04490.1 | Symbols: | unknown protein; BEST Arabidopsis thaliana protein match is: unknown protein (TAIR:AT4G38092.1); Has 75 Blast hits to 64 proteins in 20 species: Archae - 0; Bacteria - 0; Metazoa - 36; Fungi - 0; Plants - 22; Viruses - 0; Other Eukaryotes - 17 (source: NCBI BLink). | chr3:1200816-1209713 FORWARD LENGTH=1118	AT3G04490.1 | Symbols: | unknown protein; BEST Arabidopsis thaliana protein match is: unknown protein (TAIR:AT4G38092.1); Has 75 Blast hits to 64 proteins in 20 species: Archae - 0; Bacteria - 0; Metazoa - 36; Fungi - 0; Plants - 22; Viruses - 0; Other Eukaryotes - 17 (source: NCBI BLink). | chr3:1200816-1209713 FORWARD LENGTH=1118	LOC_Os10g33710.1 protein|expressed protein	LOC_Os10g33710.1 protein|expressed protein	LOC_Os10g33710.1 protein|expressed protein
Homoeologous triplet 111	TRIAE_CS42_1AL_TGACv1_000238_AA0006990	TRIAE_CS42_1BL_TGACv1_031722_AA0119730	TRIAE_CS42_1DL_TGACv1_061943_AA0206090	BD-A	7	1	1	0.973891	0.925323	0.933493	720	707	716	0	0	0	AT1G04430.1 | Symbols: | S-adenosyl-L-methionine-dependent methyltransferases superfamily protein | chr1:1198860-1201301 FORWARD LENGTH=623, AT1G04430.2 | Symbols: | S-adenosyl-L-methionine-dependent methyltransferases superfamily protein | chr1:1198860-1201301 FORWARD LENGTH=623	AT1G04430.1 | Symbols: | S-adenosyl-L-methionine-dependent methyltransferases superfamily protein | chr1:1198860-1201301 FORWARD LENGTH=623, AT1G04430.2 | Symbols: | S-adenosyl-L-methionine-dependent methyltransferases superfamily protein | chr1:1198860-1201301 FORWARD LENGTH=623	AT1G04430.1 | Symbols: | S-adenosyl-L-methionine-dependent methyltransferases superfamily protein | chr1:1198860-1201301 FORWARD LENGTH=623, AT1G04430.2 | Symbols: | S-adenosyl-L-methionine-dependent methyltransferases superfamily protein | chr1:1198860-1201301 FORWARD LENGTH=623	LOC_Os10g33720.1 protein|methyltransferase, putative, expressed, LOC_Os10g33720.3 protein|methyltransferase, putative, expressed	LOC_Os10g33720.1 protein|methyltransferase, putative, expressed, LOC_Os10g33720.3 protein|methyltransferase, putative, expressed	LOC_Os10g33720.1 protein|methyltransferase, putative, expressed, LOC_Os10g33720.3 protein|methyltransferase, putative, expressed
Homoeologous triplet 112	TRIAE_CS42_1AL_TGACv1_000242_AA0007010	TRIAE_CS42_1BL_TGACv1_031303_AA0111100	TRIAE_CS42_1DL_TGACv1_062604_AA0217160	ABD	1	1	1	0.918455	0.949813	0.940339	727	727	727	0	0	0	AT1G15130.1 | Symbols: | Endosomal targeting BRO1-like domain-containing protein | chr1:5206217-5209848 REVERSE LENGTH=846	AT1G15130.1 | Symbols: | Endosomal targeting BRO1-like domain-containing protein | chr1:5206217-5209848 REVERSE LENGTH=846	AT1G15130.1 | Symbols: | Endosomal targeting BRO1-like domain-containing protein | chr1:5206217-5209848 REVERSE LENGTH=846	LOC_Os10g35250.1 protein|vacuolar protein-sorting protein bro1, putative, expressed	LOC_Os10g35250.1 protein|vacuolar protein-sorting protein bro1, putative, expressed	LOC_Os10g35250.1 protein|vacuolar protein-sorting protein bro1, putative, expressed
Homoeologous triplet 113	TRIAE_CS42_1AL_TGACv1_000243_AA0007070	TRIAE_CS42_1BL_TGACv1_031007_AA0105670	TRIAE_CS42_1DL_TGACv1_061965_AA0206550	ABD	4	4	4	0.99159	0.99063	0.994439	69	82	72	4	0	3	AT3G11850.1 | Symbols: | Protein of unknown function, DUF593 | chr3:3739222-3741101 REVERSE LENGTH=504, AT3G11850.2 | Symbols: | Protein of unknown function, DUF593 | chr3:3739222-3741101 REVERSE LENGTH=504	AT5G06560.1 | Symbols: | Protein of unknown function, DUF593 | chr5:2003678-2005543 REVERSE LENGTH=518	AT5G06560.1 | Symbols: | Protein of unknown function, DUF593 | chr5:2003678-2005543 REVERSE LENGTH=518	LOC_Os12g30500.1 protein|DUF593 domain containing protein, expressed	LOC_Os12g30500.1 protein|DUF593 domain containing protein, expressed	LOC_Os12g30500.1 protein|DUF593 domain containing protein, expressed
Homoeologous triplet 114	TRIAE_CS42_1AL_TGACv1_000244_AA0007090	TRIAE_CS42_1BL_TGACv1_032241_AA0127320	TRIAE_CS42_1DL_TGACv1_062253_AA0211430	ABD	1	1	1	0.860858	0.887856	0.879006	675	701	664	1	11	4	AT5G25060.1 | Symbols: | RNA recognition motif (RRM)-containing protein | chr5:8634219-8639984 REVERSE LENGTH=946	AT5G25060.1 | Symbols: | RNA recognition motif (RRM)-containing protein | chr5:8634219-8639984 REVERSE LENGTH=946	AT5G25060.1 | Symbols: | RNA recognition motif (RRM)-containing protein | chr5:8634219-8639984 REVERSE LENGTH=946	LOC_Os02g08360.1 protein|RNA recognition motif, putative, expressed	LOC_Os02g08360.1 protein|RNA recognition motif, putative, expressed	LOC_Os02g08360.1 protein|RNA recognition motif, putative, expressed
Homoeologous triplet 115	TRIAE_CS42_1AL_TGACv1_000245_AA0007160	TRIAE_CS42_1BL_TGACv1_032278_AA0127810	TRIAE_CS42_1DL_TGACv1_061136_AA0186460	ABD	3	3	3	0.873616	0.908763	0.950067	54	29	34	23	14	1	AT1G15690.1 | Symbols: AVP1, ATAVP3, AVP-3, AtVHP1;1 | Inorganic H pyrophosphatase family protein | chr1:5399115-5402185 FORWARD LENGTH=770, AT1G15690.2 | Symbols: AVP1, ATAVP3, AVP-3, AtVHP1;1 | Inorganic H pyrophosphatase family protein | chr1:5399115-5402185 FORWARD LENGTH=642	AT1G15690.1 | Symbols: AVP1, ATAVP3, AVP-3, AtVHP1;1 | Inorganic H pyrophosphatase family protein | chr1:5399115-5402185 FORWARD LENGTH=770, AT1G15690.2 | Symbols: AVP1, ATAVP3, AVP-3, AtVHP1;1 | Inorganic H pyrophosphatase family protein | chr1:5399115-5402185 FORWARD LENGTH=642	AT1G15690.1 | Symbols: AVP1, ATAVP3, AVP-3, AtVHP1;1 | Inorganic H pyrophosphatase family protein | chr1:5399115-5402185 FORWARD LENGTH=770, AT1G15690.2 | Symbols: AVP1, ATAVP3, AVP-3, AtVHP1;1 | Inorganic H pyrophosphatase family protein | chr1:5399115-5402185 FORWARD LENGTH=642	LOC_Os01g23580.1 protein|inorganic H+ pyrophosphatase, putative, expressed	LOC_Os01g23580.1 protein|inorganic H+ pyrophosphatase, putative, expressed	LOC_Os01g23580.1 protein|inorganic H+ pyrophosphatase, putative, expressed
Homoeologous triplet 116	TRIAE_CS42_1AL_TGACv1_000246_AA0007210	TRIAE_CS42_1BL_TGACv1_030541_AA0093530	TRIAE_CS42_1DL_TGACv1_063761_AA0230650	BD-A	5	1	1	0.853205	0.926754	0.92947	254	174	255	59	11	21	AT1G02460.1 | Symbols: | Pectin lyase-like superfamily protein | chr1:504897-507099 REVERSE LENGTH=491	AT1G02460.1 | Symbols: | Pectin lyase-like superfamily protein | chr1:504897-507099 REVERSE LENGTH=491	AT1G02460.1 | Symbols: | Pectin lyase-like superfamily protein | chr1:504897-507099 REVERSE LENGTH=491	LOC_Os01g19170.1 protein|polygalacturonase, putative, expressed	LOC_Os01g19170.1 protein|polygalacturonase, putative, expressed	LOC_Os01g19170.1 protein|polygalacturonase, putative, expressed
Homoeologous triplet 117	TRIAE_CS42_1AL_TGACv1_000247_AA0007250	TRIAE_CS42_1BL_TGACv1_032078_AA0125020	TRIAE_CS42_1DL_TGACv1_062555_AA0216330	AD-B	2	5	2	0.353195	0.740063	0.670607	212	288	301	131	47	80	No hits found	No hits found	No hits found	LOC_Os05g34500.1 protein|expressed protein	LOC_Os05g34500.1 protein|expressed protein	LOC_Os05g34500.1 protein|expressed protein
Homoeologous triplet 118	TRIAE_CS42_1AL_TGACv1_000247_AA0007230	TRIAE_CS42_1BL_TGACv1_032078_AA0125100	TRIAE_CS42_1DL_TGACv1_062555_AA0216350	ABD	1	1	1	0.955166	0.990989	0.972304	354	320	346	64	2	10	AT3G23890.1 | Symbols: TOPII, ATTOPII | topoisomerase II | chr3:8624931-8631106 FORWARD LENGTH=1473, AT3G23890.2 | Symbols: TOPII, ATTOPII | topoisomerase II | chr3:8624931-8631106 FORWARD LENGTH=1438	AT3G23890.1 | Symbols: TOPII, ATTOPII | topoisomerase II | chr3:8624931-8631106 FORWARD LENGTH=1473, AT3G23890.2 | Symbols: TOPII, ATTOPII | topoisomerase II | chr3:8624931-8631106 FORWARD LENGTH=1438	AT3G23890.1 | Symbols: TOPII, ATTOPII | topoisomerase II | chr3:8624931-8631106 FORWARD LENGTH=1473, AT3G23890.2 | Symbols: TOPII, ATTOPII | topoisomerase II | chr3:8624931-8631106 FORWARD LENGTH=1438	LOC_Os02g47150.1 protein|DNA topoisomerase 2, putative, expressed	LOC_Os02g47150.1 protein|DNA topoisomerase 2, putative, expressed	LOC_Os02g47150.1 protein|DNA topoisomerase 2, putative, expressed
Homoeologous triplet 119	TRIAE_CS42_1AL_TGACv1_000249_AA0007280	TRIAE_CS42_1BL_TGACv1_033532_AA0140160	TRIAE_CS42_1DL_TGACv1_061434_AA0195260	AB-D	4	4	1	0.901018	0.421607	0.384285	53	109	369	42	306	168	AT5G20490.1 | Symbols: XIK, ATXIK, XI-17 | Myosin family protein with Dil domain | chr5:6927064-6936825 REVERSE LENGTH=1545, AT5G20490.2 | Symbols: XIK, ATXIK, XI-17 | Myosin family protein with Dil domain | chr5:6927064-6936079 REVERSE LENGTH=1465	AT1G54560.1 | Symbols: XIE, ATXIE | Myosin family protein with Dil domain | chr1:20371649-20379745 REVERSE LENGTH=1529	AT5G20490.1 | Symbols: XIK, ATXIK, XI-17 | Myosin family protein with Dil domain | chr5:6927064-6936825 REVERSE LENGTH=1545, AT5G20490.2 | Symbols: XIK, ATXIK, XI-17 | Myosin family protein with Dil domain | chr5:6927064-6936079 REVERSE LENGTH=1465	LOC_Os05g46030.1 protein|myosin head family protein, expressed	LOC_Os05g46030.1 protein|myosin head family protein, expressed	LOC_Os05g46030.1 protein|myosin head family protein, expressed
Homoeologous triplet 120	TRIAE_CS42_1AL_TGACv1_000249_AA0007290	TRIAE_CS42_1BL_TGACv1_033532_AA0140150	TRIAE_CS42_1DL_TGACv1_061434_AA0195270	ABD	9	9	9	0.940908	0.945584	0.950523	464	601	356	14	20	44	AT1G72770.1 | Symbols: HAB1 | homology to ABI1 | chr1:27390998-27392851 FORWARD LENGTH=511, AT1G72770.2 | Symbols: HAB1 | homology to ABI1 | chr1:27390998-27392413 FORWARD LENGTH=406, AT1G72770.3 | Symbols: HAB1 | homology to ABI1 | chr1:27390998-27392851 FORWARD LENGTH=511	AT1G72770.1 | Symbols: HAB1 | homology to ABI1 | chr1:27390998-27392851 FORWARD LENGTH=511, AT1G72770.2 | Symbols: HAB1 | homology to ABI1 | chr1:27390998-27392413 FORWARD LENGTH=406, AT1G72770.3 | Symbols: HAB1 | homology to ABI1 | chr1:27390998-27392851 FORWARD LENGTH=511	AT1G72770.1 | Symbols: HAB1 | homology to ABI1 | chr1:27390998-27392851 FORWARD LENGTH=511, AT1G72770.2 | Symbols: HAB1 | homology to ABI1 | chr1:27390998-27392413 FORWARD LENGTH=406, AT1G72770.3 | Symbols: HAB1 | homology to ABI1 | chr1:27390998-27392851 FORWARD LENGTH=511	LOC_Os05g46040.1 protein|protein phosphatase 2C, putative, expressed, LOC_Os05g46040.2 protein|protein phosphatase 2C, putative, expressed	LOC_Os05g46040.1 protein|protein phosphatase 2C, putative, expressed, LOC_Os05g46040.2 protein|protein phosphatase 2C, putative, expressed	LOC_Os05g46040.1 protein|protein phosphatase 2C, putative, expressed, LOC_Os05g46040.2 protein|protein phosphatase 2C, putative, expressed
Homoeologous triplet 121	TRIAE_CS42_1AL_TGACv1_000249_AA0007310	TRIAE_CS42_1BL_TGACv1_030460_AA0091450	TRIAE_CS42_1DL_TGACv1_063861_AA0231340	ABD	1	1	1	0.771763	0.895572	0.859389	639	676	679	28	9	8	AT1G72990.1 | Symbols: BGAL17 | beta-galactosidase 17 | chr1:27457480-27462168 REVERSE LENGTH=697, AT1G72990.2 | Symbols: BGAL17 | beta-galactosidase 17 | chr1:27457480-27461867 REVERSE LENGTH=635	AT1G72990.1 | Symbols: BGAL17 | beta-galactosidase 17 | chr1:27457480-27462168 REVERSE LENGTH=697, AT1G72990.2 | Symbols: BGAL17 | beta-galactosidase 17 | chr1:27457480-27461867 REVERSE LENGTH=635	AT1G72990.1 | Symbols: BGAL17 | beta-galactosidase 17 | chr1:27457480-27462168 REVERSE LENGTH=697, AT1G72990.2 | Symbols: BGAL17 | beta-galactosidase 17 | chr1:27457480-27461867 REVERSE LENGTH=635	LOC_Os05g46200.3 protein|beta-galactosidase 8 precursor, putative, expressed, LOC_Os05g46200.1 protein|beta-galactosidase 8 precursor, putative, expressed, LOC_Os05g46200.2 protein|beta-galactosidase 8 precursor, putative, expressed	LOC_Os05g46200.3 protein|beta-galactosidase 8 precursor, putative, expressed, LOC_Os05g46200.1 protein|beta-galactosidase 8 precursor, putative, expressed, LOC_Os05g46200.2 protein|beta-galactosidase 8 precursor, putative, expressed	LOC_Os05g46200.3 protein|beta-galactosidase 8 precursor, putative, expressed, LOC_Os05g46200.1 protein|beta-galactosidase 8 precursor, putative, expressed, LOC_Os05g46200.2 protein|beta-galactosidase 8 precursor, putative, expressed
Homoeologous triplet 122	TRIAE_CS42_1AL_TGACv1_000251_AA0007340	TRIAE_CS42_1BL_TGACv1_033082_AA0136850	TRIAE_CS42_1DL_TGACv1_062457_AA0214760	BD-A	2	7	7	0.919167	0.944841	0.952222	489	410	359	13	49	1	AT2G48120.1 | Symbols: PAC | pale cress protein (PAC) | chr2:19679870-19681351 FORWARD LENGTH=313, AT2G48120.2 | Symbols: PAC | pale cress protein (PAC) | chr2:19679870-19681351 FORWARD LENGTH=307	AT2G48120.1 | Symbols: PAC | pale cress protein (PAC) | chr2:19679870-19681351 FORWARD LENGTH=313, AT2G48120.2 | Symbols: PAC | pale cress protein (PAC) | chr2:19679870-19681351 FORWARD LENGTH=307	AT2G48120.1 | Symbols: PAC | pale cress protein (PAC) | chr2:19679870-19681351 FORWARD LENGTH=313, AT2G48120.2 | Symbols: PAC | pale cress protein (PAC) | chr2:19679870-19681351 FORWARD LENGTH=307	LOC_Os05g32680.1 protein|PAC, putative, expressed	LOC_Os05g32680.1 protein|PAC, putative, expressed	LOC_Os05g32680.1 protein|PAC, putative, expressed
Homoeologous triplet 123	TRIAE_CS42_1AL_TGACv1_000254_AA0007360	TRIAE_CS42_1BL_TGACv1_034678_AA0145290	TRIAE_CS42_1DL_TGACv1_063169_AA0224560	A-B-D	15	1	6	0.901852	0.932913	0.856847	623	612	591	4	19	18	AT5G54680.1 | Symbols: ILR3, bHLH105 | basic helix-loop-helix (bHLH) DNA-binding superfamily protein | chr5:22217270-22218993 FORWARD LENGTH=234	AT5G54680.1 | Symbols: ILR3, bHLH105 | basic helix-loop-helix (bHLH) DNA-binding superfamily protein | chr5:22217270-22218993 FORWARD LENGTH=234	AT5G54680.1 | Symbols: ILR3, bHLH105 | basic helix-loop-helix (bHLH) DNA-binding superfamily protein | chr5:22217270-22218993 FORWARD LENGTH=234	LOC_Os05g38140.1 protein|basic helix-loop-helix DND-binding domain containing protein, expressed	LOC_Os05g38140.1 protein|basic helix-loop-helix DND-binding domain containing protein, expressed	LOC_Os05g38140.1 protein|basic helix-loop-helix DND-binding domain containing protein, expressed
Homoeologous triplet 124	TRIAE_CS42_1AL_TGACv1_000255_AA0007400	TRIAE_CS42_1BL_TGACv1_033149_AA0137370	TRIAE_CS42_1DL_TGACv1_061739_AA0202750	Not clustered	0	0	0	0.851868	0.974857	0.909765	20	14	24	15	2	11	AT5G26594.1 | Symbols: ARR24, RR24 | response regulator 24 | chr5:9269282-9270254 FORWARD LENGTH=139	AT5G26594.1 | Symbols: ARR24, RR24 | response regulator 24 | chr5:9269282-9270254 FORWARD LENGTH=139	AT5G26594.1 | Symbols: ARR24, RR24 | response regulator 24 | chr5:9269282-9270254 FORWARD LENGTH=139	LOC_Os04g13480.1 protein|response regulator receiver domain containing protein, expressed	LOC_Os04g13480.1 protein|response regulator receiver domain containing protein, expressed	LOC_Os04g13480.1 protein|response regulator receiver domain containing protein, expressed
Homoeologous triplet 125	TRIAE_CS42_1AL_TGACv1_000257_AA0007440	TRIAE_CS42_1BL_TGACv1_033386_AA0139090	TRIAE_CS42_1DL_TGACv1_061404_AA0194320	ABD	1	1	1	0.942659	0.951946	0.956522	724	726	724	0	0	0	AT3G12010.1 | Symbols: | FUNCTIONS IN: molecular_function unknown; INVOLVED IN: biological_process unknown; EXPRESSED IN: sperm cell, cultured cell; CONTAINS InterPro DOMAIN/s: Colon cancer-associated Mic1-like (InterPro:IPR009755); Has 30201 Blast hits to 17322 proteins in 780 species: Archae - 12; Bacteria - 1396; Metazoa - 17338; Fungi - 3422; Plants - 5037; Viruses - 0; Other Eukaryotes - 299…	AT3G12010.1 | Symbols: | FUNCTIONS IN: molecular_function unknown; INVOLVED IN: biological_process unknown; EXPRESSED IN: sperm cell, cultured cell; CONTAINS InterPro DOMAIN/s: Colon cancer-associated Mic1-like (InterPro:IPR009755); Has 30201 Blast hits to 17322 proteins in 780 species: Archae - 12; Bacteria - 1396; Metazoa - 17338; Fungi - 3422; Plants - 5037; Viruses - 0; Other Eukaryotes - 299…	AT3G12010.1 | Symbols: | FUNCTIONS IN: molecular_function unknown; INVOLVED IN: biological_process unknown; EXPRESSED IN: sperm cell, cultured cell; CONTAINS InterPro DOMAIN/s: Colon cancer-associated Mic1-like (InterPro:IPR009755); Has 30201 Blast hits to 17322 proteins in 780 species: Archae - 12; Bacteria - 1396; Metazoa - 17338; Fungi - 3422; Plants - 5037; Viruses - 0; Other Eukaryotes - 299…	LOC_Os10g26140.3 protein|CPuORF15 - conserved peptide uORF-containing transcript, expressed, LOC_Os10g26140.1 protein|CPuORF15 - conserved peptide uORF-containing transcript, expressed, LOC_Os10g26140.2 protein|CPuORF15 - conserved peptide uORF-containing transcript, expressed	LOC_Os10g26140.3 protein|CPuORF15 - conserved peptide uORF-containing transcript, expressed, LOC_Os10g26140.1 protein|CPuORF15 - conserved peptide uORF-containing transcript, expressed, LOC_Os10g26140.2 protein|CPuORF15 - conserved peptide uORF-containing transcript, expressed	LOC_Os10g26140.3 protein|CPuORF15 - conserved peptide uORF-containing transcript, expressed, LOC_Os10g26140.1 protein|CPuORF15 - conserved peptide uORF-containing transcript, expressed, LOC_Os10g26140.2 protein|CPuORF15 - conserved peptide uORF-containing transcript, expressed
Homoeologous triplet 126	TRIAE_CS42_1AL_TGACv1_000257_AA0007450	TRIAE_CS42_1BL_TGACv1_033275_AA0138340	TRIAE_CS42_1DL_TGACv1_061404_AA0194330	ABD	1	1	1	0.957943	0.948303	0.947932	727	727	727	0	0	0	AT4G14350.1 | Symbols: | AGC (cAMP-dependent, cGMP-dependent and protein kinase C) kinase family protein | chr4:8256449-8259934 REVERSE LENGTH=551, AT4G14350.2 | Symbols: | AGC (cAMP-dependent, cGMP-dependent and protein kinase C) kinase family protein | chr4:8256449-8259934 REVERSE LENGTH=551, AT4G14350.3 | Symbols: | AGC (cAMP-dependent, cGMP-dependent and protein kinase C) kinase family protei…	AT4G14350.1 | Symbols: | AGC (cAMP-dependent, cGMP-dependent and protein kinase C) kinase family protein | chr4:8256449-8259934 REVERSE LENGTH=551, AT4G14350.2 | Symbols: | AGC (cAMP-dependent, cGMP-dependent and protein kinase C) kinase family protein | chr4:8256449-8259934 REVERSE LENGTH=551, AT4G14350.3 | Symbols: | AGC (cAMP-dependent, cGMP-dependent and protein kinase C) kinase family protei…	AT4G14350.1 | Symbols: | AGC (cAMP-dependent, cGMP-dependent and protein kinase C) kinase family protein | chr4:8256449-8259934 REVERSE LENGTH=551, AT4G14350.2 | Symbols: | AGC (cAMP-dependent, cGMP-dependent and protein kinase C) kinase family protein | chr4:8256449-8259934 REVERSE LENGTH=551, AT4G14350.3 | Symbols: | AGC (cAMP-dependent, cGMP-dependent and protein kinase C) kinase family protei…	LOC_Os05g43570.1 protein|AGC_AGC_other_NDRh_TRCd.2 - ACG kinases include homologs to PKA, PKG and PKC, expressed, LOC_Os05g43570.3 protein|AGC_AGC_other_NDRh_TRCd.2 - ACG kinases include homologs to PKA, PKG and PKC, expressed, LOC_Os05g43570.2 protein|AGC_AGC_other_NDRh_TRCd.2 - ACG kinases include homologs to PKA, PKG and PKC, expressed	LOC_Os05g43570.1 protein|AGC_AGC_other_NDRh_TRCd.2 - ACG kinases include homologs to PKA, PKG and PKC, expressed, LOC_Os05g43570.3 protein|AGC_AGC_other_NDRh_TRCd.2 - ACG kinases include homologs to PKA, PKG and PKC, expressed, LOC_Os05g43570.2 protein|AGC_AGC_other_NDRh_TRCd.2 - ACG kinases include homologs to PKA, PKG and PKC, expressed	LOC_Os05g43570.1 protein|AGC_AGC_other_NDRh_TRCd.2 - ACG kinases include homologs to PKA, PKG and PKC, expressed, LOC_Os05g43570.3 protein|AGC_AGC_other_NDRh_TRCd.2 - ACG kinases include homologs to PKA, PKG and PKC, expressed, LOC_Os05g43570.2 protein|AGC_AGC_other_NDRh_TRCd.2 - ACG kinases include homologs to PKA, PKG and PKC, expressed
Homoeologous triplet 127	TRIAE_CS42_1AL_TGACv1_000259_AA0007510	TRIAE_CS42_1BL_TGACv1_034431_AA0144500	TRIAE_CS42_1DL_TGACv1_061139_AA0186660	ABD	4	4	4	0.959226	0.970733	0.962186	124	92	146	6	0	6	AT5G46090.1 | Symbols: | Protein of unknown function (DUF679) | chr5:18693485-18694129 FORWARD LENGTH=214	AT4G18425.1 | Symbols: | Protein of unknown function (DUF679) | chr4:10181421-10182062 REVERSE LENGTH=213	AT5G46090.1 | Symbols: | Protein of unknown function (DUF679) | chr5:18693485-18694129 FORWARD LENGTH=214	LOC_Os05g48840.1 protein|expressed protein	LOC_Os05g48840.1 protein|expressed protein	LOC_Os05g48840.1 protein|expressed protein
Homoeologous triplet 128	TRIAE_CS42_1AL_TGACv1_000260_AA0007590	TRIAE_CS42_1BL_TGACv1_030244_AA0083620	TRIAE_CS42_1DL_TGACv1_061068_AA0184030	ABD	7	7	7	0.703359	0.678261	0.862815	392	34	151	358	180	79	AT1G77670.1 | Symbols: | Pyridoxal phosphate (PLP)-dependent transferases superfamily protein | chr1:29189043-29190901 REVERSE LENGTH=440	AT1G77670.1 | Symbols: | Pyridoxal phosphate (PLP)-dependent transferases superfamily protein | chr1:29189043-29190901 REVERSE LENGTH=440	AT1G77670.1 | Symbols: | Pyridoxal phosphate (PLP)-dependent transferases superfamily protein | chr1:29189043-29190901 REVERSE LENGTH=440	LOC_Os10g34350.1 protein|aminotransferase, classes I and II, domain containing protein, expressed	LOC_Os10g34350.1 protein|aminotransferase, classes I and II, domain containing protein, expressed	LOC_Os10g34350.1 protein|aminotransferase, classes I and II, domain containing protein, expressed
Homoeologous triplet 129	TRIAE_CS42_1AL_TGACv1_000260_AA0007580	TRIAE_CS42_1BL_TGACv1_033462_AA0139650	TRIAE_CS42_1DL_TGACv1_061068_AA0184060	ABD	14	14	14	0.980596	0.99531	0.976936	12	13	558	1	545	551	AT1G02050.1 | Symbols: LAP6 | Chalcone and stilbene synthase family protein | chr1:359164-360441 REVERSE LENGTH=395	AT1G02050.1 | Symbols: LAP6 | Chalcone and stilbene synthase family protein | chr1:359164-360441 REVERSE LENGTH=395	AT1G02050.1 | Symbols: LAP6 | Chalcone and stilbene synthase family protein | chr1:359164-360441 REVERSE LENGTH=395	LOC_Os10g34360.1 protein|stilbene synthase, putative, expressed	LOC_Os10g34360.1 protein|stilbene synthase, putative, expressed	LOC_Os10g34360.1 protein|stilbene synthase, putative, expressed
Homoeologous triplet 130	TRIAE_CS42_1AL_TGACv1_000262_AA0007610	TRIAE_CS42_1BL_TGACv1_032518_AA0130830	TRIAE_CS42_1DL_TGACv1_061130_AA0186340	ABD	1	1	1	0.822858	0.411736	0.401122	686	718	698	7	36	11	AT4G17615.1 | Symbols: CBL1, ATCBL1, SCABP5 | calcineurin B-like protein 1 | chr4:9817142-9818995 FORWARD LENGTH=213, AT4G17615.2 | Symbols: CBL1, ATCBL1, SCABP5 | calcineurin B-like protein 1 | chr4:9817981-9818995 FORWARD LENGTH=171	AT4G17615.1 | Symbols: CBL1, ATCBL1, SCABP5 | calcineurin B-like protein 1 | chr4:9817142-9818995 FORWARD LENGTH=213, AT4G17615.2 | Symbols: CBL1, ATCBL1, SCABP5 | calcineurin B-like protein 1 | chr4:9817981-9818995 FORWARD LENGTH=171	AT4G17615.1 | Symbols: CBL1, ATCBL1, SCABP5 | calcineurin B-like protein 1 | chr4:9817142-9818995 FORWARD LENGTH=213, AT4G17615.2 | Symbols: CBL1, ATCBL1, SCABP5 | calcineurin B-like protein 1 | chr4:9817981-9818995 FORWARD LENGTH=171	LOC_Os10g41510.1 protein|calcineurin B, putative, expressed	LOC_Os10g41510.1 protein|calcineurin B, putative, expressed	LOC_Os10g41510.1 protein|calcineurin B, putative, expressed
Homoeologous triplet 131	TRIAE_CS42_1AL_TGACv1_000262_AA0007660	TRIAE_CS42_1BL_TGACv1_031487_AA0114960	TRIAE_CS42_1DL_TGACv1_061735_AA0202690	ABD	3	3	3	0.955526	0.912778	0.939333	715	709	689	1	0	1	AT1G02170.1 | Symbols: LOL3, ATMCPB1, MCP1B, ATMC1, MC1 | metacaspase 1 | chr1:411883-413426 FORWARD LENGTH=367	AT1G02170.1 | Symbols: LOL3, ATMCPB1, MCP1B, ATMC1, MC1 | metacaspase 1 | chr1:411883-413426 FORWARD LENGTH=367	AT1G02170.1 | Symbols: LOL3, ATMCPB1, MCP1B, ATMC1, MC1 | metacaspase 1 | chr1:411883-413426 FORWARD LENGTH=367	LOC_Os03g27210.1 protein|LOL3, putative, expressed	LOC_Os03g27210.1 protein|LOL3, putative, expressed	LOC_Os03g27210.1 protein|LOL3, putative, expressed
Homoeologous triplet 132	TRIAE_CS42_1AL_TGACv1_000262_AA0007620	TRIAE_CS42_1BL_TGACv1_033624_AA0140740	TRIAE_CS42_1DL_TGACv1_061130_AA0186330	ABD	1	1	1	0.912597	0.733668	0.80047	720	717	724	0	0	0	AT5G47080.1 | Symbols: CKB1 | casein kinase II beta chain 1 | chr5:19124969-19126397 REVERSE LENGTH=287, AT5G47080.2 | Symbols: CKB1 | casein kinase II beta chain 1 | chr5:19125231-19126397 REVERSE LENGTH=256, AT5G47080.3 | Symbols: CKB1 | casein kinase II beta chain 1 | chr5:19125231-19126397 REVERSE LENGTH=253, AT5G47080.4 | Symbols: CKB1 | casein kinase II beta chain 1 | chr5:19124969-19126397…	AT5G47080.1 | Symbols: CKB1 | casein kinase II beta chain 1 | chr5:19124969-19126397 REVERSE LENGTH=287, AT5G47080.2 | Symbols: CKB1 | casein kinase II beta chain 1 | chr5:19125231-19126397 REVERSE LENGTH=256, AT5G47080.3 | Symbols: CKB1 | casein kinase II beta chain 1 | chr5:19125231-19126397 REVERSE LENGTH=253, AT5G47080.4 | Symbols: CKB1 | casein kinase II beta chain 1 | chr5:19124969-19126397…	AT5G47080.1 | Symbols: CKB1 | casein kinase II beta chain 1 | chr5:19124969-19126397 REVERSE LENGTH=287, AT5G47080.2 | Symbols: CKB1 | casein kinase II beta chain 1 | chr5:19125231-19126397 REVERSE LENGTH=256, AT5G47080.3 | Symbols: CKB1 | casein kinase II beta chain 1 | chr5:19125231-19126397 REVERSE LENGTH=253, AT5G47080.4 | Symbols: CKB1 | casein kinase II beta chain 1 | chr5:19124969-19126397…	LOC_Os10g41520.1 protein|casein kinase II subunit beta-4, putative, expressed, LOC_Os10g41520.2 protein|casein kinase II subunit beta-4, putative, expressed	LOC_Os10g41520.1 protein|casein kinase II subunit beta-4, putative, expressed, LOC_Os10g41520.2 protein|casein kinase II subunit beta-4, putative, expressed	LOC_Os10g41520.1 protein|casein kinase II subunit beta-4, putative, expressed, LOC_Os10g41520.2 protein|casein kinase II subunit beta-4, putative, expressed
Homoeologous triplet 133	TRIAE_CS42_1AL_TGACv1_000265_AA0007680	TRIAE_CS42_1BL_TGACv1_031510_AA0115290	TRIAE_CS42_1DL_TGACv1_061194_AA0188390	ABD	6	6	6	0.93829	0.96367	0.932219	543	518	498	8	8	15	AT1G54570.1 | Symbols: | Esterase/lipase/thioesterase family protein | chr1:20380649-20384953 REVERSE LENGTH=704	AT1G54570.1 | Symbols: | Esterase/lipase/thioesterase family protein | chr1:20380649-20384953 REVERSE LENGTH=704	AT1G54570.1 | Symbols: | Esterase/lipase/thioesterase family protein | chr1:20380649-20384953 REVERSE LENGTH=704	LOC_Os01g26039.1 protein|expressed protein	LOC_Os01g26039.1 protein|expressed protein	LOC_Os01g26039.1 protein|expressed protein
Homoeologous triplet 134	TRIAE_CS42_1AL_TGACv1_000266_AA0007730	TRIAE_CS42_1BS_TGACv1_051417_AA0179600	TRIAE_CS42_1DS_TGACv1_081307_AA0259640	ABD	1	1	1	0.584343	0.859068	0.535152	713	708	721	58	3	106	AT3G28480.1 | Symbols: | Oxoglutarate/iron-dependent oxygenase | chr3:10676266-10678262 REVERSE LENGTH=316, AT3G28480.2 | Symbols: | Oxoglutarate/iron-dependent oxygenase | chr3:10676266-10678262 REVERSE LENGTH=324	AT3G28480.1 | Symbols: | Oxoglutarate/iron-dependent oxygenase | chr3:10676266-10678262 REVERSE LENGTH=316, AT3G28480.2 | Symbols: | Oxoglutarate/iron-dependent oxygenase | chr3:10676266-10678262 REVERSE LENGTH=324	AT3G28480.1 | Symbols: | Oxoglutarate/iron-dependent oxygenase | chr3:10676266-10678262 REVERSE LENGTH=316, AT3G28480.2 | Symbols: | Oxoglutarate/iron-dependent oxygenase | chr3:10676266-10678262 REVERSE LENGTH=324	LOC_Os10g27340.2 protein|oxidoreductase, putative, expressed	LOC_Os10g27340.2 protein|oxidoreductase, putative, expressed	LOC_Os10g27340.2 protein|oxidoreductase, putative, expressed
Homoeologous triplet 135	TRIAE_CS42_1AL_TGACv1_000269_AA0007840	TRIAE_CS42_1BL_TGACv1_031371_AA0112750	TRIAE_CS42_1DL_TGACv1_061902_AA0205430	ABD	1	1	1	0.914654	0.878415	0.952456	727	727	726	0	1	1	AT2G44900.1 | Symbols: ARABIDILLO-1, ARABIDILLO1 | ARABIDILLO-1 | chr2:18511719-18515762 REVERSE LENGTH=930	AT2G44900.1 | Symbols: ARABIDILLO-1, ARABIDILLO1 | ARABIDILLO-1 | chr2:18511719-18515762 REVERSE LENGTH=930	AT2G44900.1 | Symbols: ARABIDILLO-1, ARABIDILLO1 | ARABIDILLO-1 | chr2:18511719-18515762 REVERSE LENGTH=930	LOC_Os10g41360.1 protein|ARABIDILLO-1, putative, expressed	LOC_Os10g41360.1 protein|ARABIDILLO-1, putative, expressed	LOC_Os10g41360.1 protein|ARABIDILLO-1, putative, expressed
Homoeologous triplet 136	TRIAE_CS42_1AL_TGACv1_000276_AA0007950	TRIAE_CS42_1BL_TGACv1_031632_AA0117480	TRIAE_CS42_1DL_TGACv1_063037_AA0223270	ABD	1	1	1	0.973773	0.981197	0.981435	727	726	727	1	0	1	AT3G12390.1 | Symbols: | Nascent polypeptide-associated complex (NAC), alpha subunit family protein | chr3:3942344-3943595 FORWARD LENGTH=203	AT3G12390.1 | Symbols: | Nascent polypeptide-associated complex (NAC), alpha subunit family protein | chr3:3942344-3943595 FORWARD LENGTH=203	AT3G12390.1 | Symbols: | Nascent polypeptide-associated complex (NAC), alpha subunit family protein | chr3:3942344-3943595 FORWARD LENGTH=203	LOC_Os05g31000.1 protein|nascent polypeptide-associated complex subunit alpha, putative, expressed	LOC_Os05g31000.1 protein|nascent polypeptide-associated complex subunit alpha, putative, expressed	LOC_Os05g31000.1 protein|nascent polypeptide-associated complex subunit alpha, putative, expressed
Homoeologous triplet 137	TRIAE_CS42_1AL_TGACv1_000276_AA0007940	TRIAE_CS42_1BL_TGACv1_031829_AA0121230	TRIAE_CS42_1DL_TGACv1_063134_AA0224270	ABD	1	1	1	0.820465	0.869386	0.791342	705	727	704	98	0	28	AT3G24740.1 | Symbols: | Protein of unknown function (DUF1644) | chr3:9032397-9033461 FORWARD LENGTH=354, AT3G24740.2 | Symbols: | Protein of unknown function (DUF1644) | chr3:9032397-9033461 FORWARD LENGTH=354	AT3G24740.1 | Symbols: | Protein of unknown function (DUF1644) | chr3:9032397-9033461 FORWARD LENGTH=354, AT3G24740.2 | Symbols: | Protein of unknown function (DUF1644) | chr3:9032397-9033461 FORWARD LENGTH=354	AT3G24740.1 | Symbols: | Protein of unknown function (DUF1644) | chr3:9032397-9033461 FORWARD LENGTH=354, AT3G24740.2 | Symbols: | Protein of unknown function (DUF1644) | chr3:9032397-9033461 FORWARD LENGTH=354	LOC_Os07g23790.2 protein|expressed protein, LOC_Os07g23790.4 protein|expressed protein, LOC_Os07g23790.1 protein|expressed protein, LOC_Os07g23790.6 protein|expressed protein, LOC_Os07g23790.3 protein|expressed protein, LOC_Os07g23790.8 protein|expressed protein, LOC_Os07g23790.7 protein|expressed protein, LOC_Os07g23790.5 protein|expressed protein	LOC_Os07g23790.2 protein|expressed protein, LOC_Os07g23790.4 protein|expressed protein, LOC_Os07g23790.1 protein|expressed protein, LOC_Os07g23790.6 protein|expressed protein, LOC_Os07g23790.3 protein|expressed protein, LOC_Os07g23790.8 protein|expressed protein, LOC_Os07g23790.7 protein|expressed protein, LOC_Os07g23790.5 protein|expressed protein	LOC_Os07g23790.2 protein|expressed protein, LOC_Os07g23790.4 protein|expressed protein, LOC_Os07g23790.1 protein|expressed protein, LOC_Os07g23790.6 protein|expressed protein, LOC_Os07g23790.3 protein|expressed protein, LOC_Os07g23790.8 protein|expressed protein, LOC_Os07g23790.7 protein|expressed protein, LOC_Os07g23790.5 protein|expressed protein
Homoeologous triplet 138	TRIAE_CS42_1AL_TGACv1_000284_AA0008040	TRIAE_CS42_3B_TGACv1_224633_AA0799040	TRIAE_CS42_3DL_TGACv1_249164_AA0840030	AB-D	3	3	1	0.918255	0.874529	0.811041	588	616	640	12	16	21	AT2G31390.1 | Symbols: | pfkB-like carbohydrate kinase family protein | chr2:13383635-13386116 REVERSE LENGTH=325	AT2G31390.1 | Symbols: | pfkB-like carbohydrate kinase family protein | chr2:13383635-13386116 REVERSE LENGTH=325	AT2G31390.1 | Symbols: | pfkB-like carbohydrate kinase family protein | chr2:13383635-13386116 REVERSE LENGTH=325	LOC_Os01g66940.1 protein|kinase, pfkB family, putative, expressed	LOC_Os01g66940.1 protein|kinase, pfkB family, putative, expressed	LOC_Os01g66940.1 protein|kinase, pfkB family, putative, expressed
Homoeologous triplet 139	TRIAE_CS42_1AL_TGACv1_000296_AA0008190	TRIAE_CS42_1BL_TGACv1_030991_AA0105190	TRIAE_CS42_1DL_TGACv1_062473_AA0214980	A-B-D	1	13	3	0.506292	0.811657	0.612588	406	134	532	112	12	319	AT1G17530.1 | Symbols: ATTIM23-1, TIM23-1 | translocase of inner mitochondrial membrane 23 | chr1:6027723-6028286 FORWARD LENGTH=187	AT1G17530.1 | Symbols: ATTIM23-1, TIM23-1 | translocase of inner mitochondrial membrane 23 | chr1:6027723-6028286 FORWARD LENGTH=187	AT1G17530.1 | Symbols: ATTIM23-1, TIM23-1 | translocase of inner mitochondrial membrane 23 | chr1:6027723-6028286 FORWARD LENGTH=187	LOC_Os10g37530.1 protein|mitochondrial import inner membrane translocase subunit Tim17, putative, expressed	LOC_Os03g02390.1 protein|mitochondrial import inner membrane translocase subunit Tim17, putative, expressed	LOC_Os10g37530.1 protein|mitochondrial import inner membrane translocase subunit Tim17, putative, expressed
Homoeologous triplet 140	TRIAE_CS42_1AL_TGACv1_000296_AA0008180	TRIAE_CS42_4BL_TGACv1_321810_AA1065710	TRIAE_CS42_1DL_TGACv1_062473_AA0215000	AD-B	1	7	1	0.826193	0.967574	0.779846	720	681	721	87	0	74	AT1G64650.1 | Symbols: | Major facilitator superfamily protein | chr1:24023805-24026336 REVERSE LENGTH=462, AT1G64650.2 | Symbols: | Major facilitator superfamily protein | chr1:24023805-24026048 REVERSE LENGTH=421	AT1G64650.1 | Symbols: | Major facilitator superfamily protein | chr1:24023805-24026336 REVERSE LENGTH=462, AT1G64650.2 | Symbols: | Major facilitator superfamily protein | chr1:24023805-24026048 REVERSE LENGTH=421	AT1G64650.1 | Symbols: | Major facilitator superfamily protein | chr1:24023805-24026336 REVERSE LENGTH=462, AT1G64650.2 | Symbols: | Major facilitator superfamily protein | chr1:24023805-24026048 REVERSE LENGTH=421	LOC_Os10g37520.1 protein|major facilitator superfamily domain-containing protein 5, putative, expressed, LOC_Os10g37520.2 protein|major facilitator superfamily domain-containing protein 5, putative, expressed	LOC_Os03g02380.1 protein|major facilitator superfamily domain-containing protein 5, putative, expressed, LOC_Os03g02380.2 protein|major facilitator superfamily domain-containing protein 5, putative, expressed	LOC_Os10g37520.1 protein|major facilitator superfamily domain-containing protein 5, putative, expressed, LOC_Os10g37520.2 protein|major facilitator superfamily domain-containing protein 5, putative, expressed
Homoeologous triplet 141	TRIAE_CS42_1AL_TGACv1_000300_AA0008320	TRIAE_CS42_1BL_TGACv1_031390_AA0112990	TRIAE_CS42_1DL_TGACv1_061215_AA0189110	ABD	7	7	7	0.785022	0.724913	0.87214	426	449	456	64	51	8	AT2G38090.1 | Symbols: | Duplicated homeodomain-like superfamily protein | chr2:15945278-15946775 FORWARD LENGTH=298	AT2G38090.1 | Symbols: | Duplicated homeodomain-like superfamily protein | chr2:15945278-15946775 FORWARD LENGTH=298	AT2G38090.1 | Symbols: | Duplicated homeodomain-like superfamily protein | chr2:15945278-15946775 FORWARD LENGTH=298	LOC_Os05g37730.1 protein|MYB family transcription factor, putative, expressed	LOC_Os05g37730.1 protein|MYB family transcription factor, putative, expressed	LOC_Os05g37730.1 protein|MYB family transcription factor, putative, expressed
Homoeologous triplet 142	TRIAE_CS42_1AL_TGACv1_000303_AA0008390	TRIAE_CS42_1BL_TGACv1_032045_AA0124670	TRIAE_CS42_1DL_TGACv1_062060_AA0208170	ABD	1	1	1	0.935728	0.973281	0.956106	617	626	619	0	0	0	AT5G58450.1 | Symbols: | Tetratricopeptide repeat (TPR)-like superfamily protein | chr5:23626826-23632071 FORWARD LENGTH=1065	AT5G58450.1 | Symbols: | Tetratricopeptide repeat (TPR)-like superfamily protein | chr5:23626826-23632071 FORWARD LENGTH=1065	AT5G58450.1 | Symbols: | Tetratricopeptide repeat (TPR)-like superfamily protein | chr5:23626826-23632071 FORWARD LENGTH=1065	LOC_Os05g27870.1 protein|expressed protein	LOC_Os05g27870.1 protein|expressed protein	LOC_Os05g27870.1 protein|expressed protein
Homoeologous triplet 143	TRIAE_CS42_1AL_TGACv1_000306_AA0008490	TRIAE_CS42_1BL_TGACv1_031388_AA0112960	TRIAE_CS42_1DL_TGACv1_061638_AA0200670	ABD	2	2	2	0.976816	0.97038	0.969412	547	557	534	1	2	9	AT3G56040.1 | Symbols: UGP3 | UDP-glucose pyrophosphorylase 3 | chr3:20792689-20797482 REVERSE LENGTH=883	AT3G56040.1 | Symbols: UGP3 | UDP-glucose pyrophosphorylase 3 | chr3:20792689-20797482 REVERSE LENGTH=883	AT3G56040.1 | Symbols: UGP3 | UDP-glucose pyrophosphorylase 3 | chr3:20792689-20797482 REVERSE LENGTH=883	LOC_Os05g39230.2 protein|low photochemical bleaching 1 protein, putative, expressed, LOC_Os05g39230.1 protein|low photochemical bleaching 1 protein, putative, expressed	LOC_Os05g39230.2 protein|low photochemical bleaching 1 protein, putative, expressed, LOC_Os05g39230.1 protein|low photochemical bleaching 1 protein, putative, expressed	LOC_Os05g39230.2 protein|low photochemical bleaching 1 protein, putative, expressed, LOC_Os05g39230.1 protein|low photochemical bleaching 1 protein, putative, expressed
Homoeologous triplet 144	TRIAE_CS42_1AL_TGACv1_000313_AA0008540	TRIAE_CS42_1BL_TGACv1_030722_AA0099160	TRIAE_CS42_1DL_TGACv1_063549_AA0228530	ABD	1	1	1	0.788867	0.897092	0.78961	8	19	9	3	0	5	AT5G42120.1 | Symbols: | Concanavalin A-like lectin protein kinase family protein | chr5:16833073-16835148 REVERSE LENGTH=691	AT5G42120.1 | Symbols: | Concanavalin A-like lectin protein kinase family protein | chr5:16833073-16835148 REVERSE LENGTH=691	AT5G42120.1 | Symbols: | Concanavalin A-like lectin protein kinase family protein | chr5:16833073-16835148 REVERSE LENGTH=691	LOC_Os02g26160.2 protein|receptor lectin kinase like protein, putative, expressed, LOC_Os02g26160.1 protein|receptor lectin kinase like protein, putative, expressed	LOC_Os02g26160.2 protein|receptor lectin kinase like protein, putative, expressed, LOC_Os02g26160.1 protein|receptor lectin kinase like protein, putative, expressed	LOC_Os02g26160.2 protein|receptor lectin kinase like protein, putative, expressed, LOC_Os02g26160.1 protein|receptor lectin kinase like protein, putative, expressed
Homoeologous triplet 145	TRIAE_CS42_1AL_TGACv1_000318_AA0008620	TRIAE_CS42_1BL_TGACv1_032203_AA0126690	TRIAE_CS42_1DL_TGACv1_062737_AA0219000	ABD	1	1	1	0.921191	0.910144	0.940477	727	727	727	0	0	0	AT5G64130.1 | Symbols: | cAMP-regulated phosphoprotein 19-related protein | chr5:25664547-25665339 REVERSE LENGTH=115, AT5G64130.2 | Symbols: | cAMP-regulated phosphoprotein 19-related protein | chr5:25664540-25665145 REVERSE LENGTH=83, AT5G64130.3 | Symbols: | cAMP-regulated phosphoprotein 19-related protein | chr5:25664547-25665339 REVERSE LENGTH=140	AT5G64130.1 | Symbols: | cAMP-regulated phosphoprotein 19-related protein | chr5:25664547-25665339 REVERSE LENGTH=115, AT5G64130.2 | Symbols: | cAMP-regulated phosphoprotein 19-related protein | chr5:25664540-25665145 REVERSE LENGTH=83, AT5G64130.3 | Symbols: | cAMP-regulated phosphoprotein 19-related protein | chr5:25664547-25665339 REVERSE LENGTH=140	AT5G64130.1 | Symbols: | cAMP-regulated phosphoprotein 19-related protein | chr5:25664547-25665339 REVERSE LENGTH=115, AT5G64130.2 | Symbols: | cAMP-regulated phosphoprotein 19-related protein | chr5:25664540-25665145 REVERSE LENGTH=83, AT5G64130.3 | Symbols: | cAMP-regulated phosphoprotein 19-related protein | chr5:25664547-25665339 REVERSE LENGTH=140	LOC_Os05g49160.1 protein|expressed protein, LOC_Os05g49160.2 protein|expressed protein, LOC_Os05g49160.3 protein|expressed protein	LOC_Os05g49160.1 protein|expressed protein, LOC_Os05g49160.2 protein|expressed protein, LOC_Os05g49160.3 protein|expressed protein	LOC_Os05g49160.1 protein|expressed protein, LOC_Os05g49160.2 protein|expressed protein, LOC_Os05g49160.3 protein|expressed protein
Homoeologous triplet 146	TRIAE_CS42_1AL_TGACv1_000318_AA0008570	TRIAE_CS42_1BL_TGACv1_032844_AA0134660	TRIAE_CS42_1DL_TGACv1_063566_AA0228640	ABD	1	1	1	0.894517	0.909114	0.860177	471	390	495	18	3	20	AT3G15095.1 | Symbols: | unknown protein; FUNCTIONS IN: molecular_function unknown; INVOLVED IN: biological_process unknown; LOCATED IN: chloroplast; EXPRESSED IN: 22 plant structures; EXPRESSED DURING: 13 growth stages; Has 9762 Blast hits to 6439 proteins in 764 species: Archae - 77; Bacteria - 1339; Metazoa - 3211; Fungi - 718; Plants - 437; Viruses - 131; Other Eukaryotes - 3849 (source: NCBI…	AT3G15095.1 | Symbols: | unknown protein; FUNCTIONS IN: molecular_function unknown; INVOLVED IN: biological_process unknown; LOCATED IN: chloroplast; EXPRESSED IN: 22 plant structures; EXPRESSED DURING: 13 growth stages; Has 9762 Blast hits to 6439 proteins in 764 species: Archae - 77; Bacteria - 1339; Metazoa - 3211; Fungi - 718; Plants - 437; Viruses - 131; Other Eukaryotes - 3849 (source: NCBI…	AT3G15095.1 | Symbols: | unknown protein; FUNCTIONS IN: molecular_function unknown; INVOLVED IN: biological_process unknown; LOCATED IN: chloroplast; EXPRESSED IN: 22 plant structures; EXPRESSED DURING: 13 growth stages; Has 9762 Blast hits to 6439 proteins in 764 species: Archae - 77; Bacteria - 1339; Metazoa - 3211; Fungi - 718; Plants - 437; Viruses - 131; Other Eukaryotes - 3849 (source: NCBI…	LOC_Os06g24540.1 protein|expressed protein	LOC_Os06g24540.1 protein|expressed protein	LOC_Os06g24540.1 protein|expressed protein
Homoeologous triplet 147	TRIAE_CS42_1AL_TGACv1_000322_AA0008740	TRIAE_CS42_1BL_TGACv1_031025_AA0106050	TRIAE_CS42_1DL_TGACv1_062556_AA0216360	ABD	9	9	9	0.873252	0.881679	0.923478	68	52	85	13	14	20	AT5G14700.1 | Symbols: | NAD(P)-binding Rossmann-fold superfamily protein | chr5:4740502-4743327 REVERSE LENGTH=368	AT5G14700.1 | Symbols: | NAD(P)-binding Rossmann-fold superfamily protein | chr5:4740502-4743327 REVERSE LENGTH=368	AT5G14700.1 | Symbols: | NAD(P)-binding Rossmann-fold superfamily protein | chr5:4740502-4743327 REVERSE LENGTH=368	LOC_Os05g50250.1 protein|cinnamoyl-CoA reductase-related, putative, expressed	LOC_Os05g50250.1 protein|cinnamoyl-CoA reductase-related, putative, expressed	LOC_Os05g50250.1 protein|cinnamoyl-CoA reductase-related, putative, expressed
Homoeologous triplet 148	TRIAE_CS42_1AL_TGACv1_000327_AA0008960	TRIAE_CS42_1BL_TGACv1_030243_AA0083440	TRIAE_CS42_1DL_TGACv1_063903_AA0231580	AD-B	1	8	1	0.774052	0.939636	0.806913	447	416	425	18	1	9	AT1G53000.1 | Symbols: KDSB | Nucleotide-diphospho-sugar transferases superfamily protein | chr1:19745330-19747133 REVERSE LENGTH=290	AT1G53000.1 | Symbols: KDSB | Nucleotide-diphospho-sugar transferases superfamily protein | chr1:19745330-19747133 REVERSE LENGTH=290	AT1G53000.1 | Symbols: KDSB | Nucleotide-diphospho-sugar transferases superfamily protein | chr1:19745330-19747133 REVERSE LENGTH=290	LOC_Os05g48750.1 protein|3-deoxy-manno-octulosonate cytidylyltransferase, putative, expressed	LOC_Os05g48750.1 protein|3-deoxy-manno-octulosonate cytidylyltransferase, putative, expressed	LOC_Os05g48750.1 protein|3-deoxy-manno-octulosonate cytidylyltransferase, putative, expressed
Homoeologous triplet 149	TRIAE_CS42_1AL_TGACv1_000328_AA0009060	TRIAE_CS42_1BL_TGACv1_030301_AA0086000	TRIAE_CS42_1DL_TGACv1_061527_AA0197750	AD-B	1	7	1	0.597159	0.931534	0.595928	658	154	626	582	9	538	AT3G20475.1 | Symbols: ATMSH5, MSH5 | MUTS-homologue 5 | chr3:7143546-7150811 FORWARD LENGTH=807	AT3G20475.1 | Symbols: ATMSH5, MSH5 | MUTS-homologue 5 | chr3:7143546-7150811 FORWARD LENGTH=807	AT3G20475.1 | Symbols: ATMSH5, MSH5 | MUTS-homologue 5 | chr3:7143546-7150811 FORWARD LENGTH=807	LOC_Os05g41880.1 protein|mutS domain V family protein, expressed	LOC_Os05g41880.1 protein|mutS domain V family protein, expressed	LOC_Os05g41880.1 protein|mutS domain V family protein, expressed
Homoeologous triplet 150	TRIAE_CS42_1AL_TGACv1_000329_AA0009090	TRIAE_CS42_1BL_TGACv1_032137_AA0125850	TRIAE_CS42_1DL_TGACv1_061153_AA0187190	ABD	1	1	1	0.638468	0.702714	0.685615	20	35	60	1	1	1	AT5G52545.1 | Symbols: | unknown protein; FUNCTIONS IN: molecular_function unknown; INVOLVED IN: biological_process unknown; LOCATED IN: cellular_component unknown; EXPRESSED IN: cultured cell; Has 16 Blast hits to 16 proteins in 8 species: Archae - 0; Bacteria - 0; Metazoa - 0; Fungi - 0; Plants - 16; Viruses - 0; Other Eukaryotes - 0 (source: NCBI BLink). | chr5:21323959-21324198 REVERSE LENGTH…	AT5G52545.1 | Symbols: | unknown protein; FUNCTIONS IN: molecular_function unknown; INVOLVED IN: biological_process unknown; LOCATED IN: cellular_component unknown; EXPRESSED IN: cultured cell; Has 16 Blast hits to 16 proteins in 8 species: Archae - 0; Bacteria - 0; Metazoa - 0; Fungi - 0; Plants - 16; Viruses - 0; Other Eukaryotes - 0 (source: NCBI BLink). | chr5:21323959-21324198 REVERSE LENGTH…	AT3G10400.1 | Symbols: | RNA recognition motif and CCHC-type zinc finger domains containing protein | chr3:3232636-3233421 FORWARD LENGTH=261	LOC_Os10g39010.1 protein|TKL_IRAK_CrRLK1L-1.16 - The CrRLK1L-1 subfamily has homology to the CrRLK1L homolog, expressed, LOC_Os10g39010.4 protein|TKL_IRAK_CrRLK1L-1.16 - The CrRLK1L-1 subfamily has homology to the CrRLK1L homolog, expressed, LOC_Os10g39010.3 protein|TKL_IRAK_CrRLK1L-1.16 - The CrRLK1L-1 subfamily has homology to the CrRLK1L homolog, expressed, LOC_Os10g39010.5 protein|TKL_IRAK_Cr…	LOC_Os10g39010.1 protein|TKL_IRAK_CrRLK1L-1.16 - The CrRLK1L-1 subfamily has homology to the CrRLK1L homolog, expressed, LOC_Os10g39010.4 protein|TKL_IRAK_CrRLK1L-1.16 - The CrRLK1L-1 subfamily has homology to the CrRLK1L homolog, expressed, LOC_Os10g39010.3 protein|TKL_IRAK_CrRLK1L-1.16 - The CrRLK1L-1 subfamily has homology to the CrRLK1L homolog, expressed, LOC_Os10g39010.5 protein|TKL_IRAK_Cr…	LOC_Os10g39010.1 protein|TKL_IRAK_CrRLK1L-1.16 - The CrRLK1L-1 subfamily has homology to the CrRLK1L homolog, expressed, LOC_Os10g39010.4 protein|TKL_IRAK_CrRLK1L-1.16 - The CrRLK1L-1 subfamily has homology to the CrRLK1L homolog, expressed, LOC_Os10g39010.3 protein|TKL_IRAK_CrRLK1L-1.16 - The CrRLK1L-1 subfamily has homology to the CrRLK1L homolog, expressed, LOC_Os10g39010.5 protein|TKL_IRAK_Cr…
Homoeologous triplet 151	TRIAE_CS42_1AL_TGACv1_000329_AA0009110	TRIAE_CS42_1BL_TGACv1_033478_AA0139730	TRIAE_CS42_1DL_TGACv1_061153_AA0187210	ABD	1	1	1	0.928707	0.916992	0.900609	654	705	718	0	4	0	AT2G30700.1 | Symbols: | unknown protein; BEST Arabidopsis thaliana protein match is: unknown protein (TAIR:AT1G61900.1); Has 68 Blast hits to 67 proteins in 13 species: Archae - 0; Bacteria - 2; Metazoa - 0; Fungi - 0; Plants - 66; Viruses - 0; Other Eukaryotes - 0 (source: NCBI BLink). | chr2:13082033-13084384 REVERSE LENGTH=480	AT2G30700.1 | Symbols: | unknown protein; BEST Arabidopsis thaliana protein match is: unknown protein (TAIR:AT1G61900.1); Has 68 Blast hits to 67 proteins in 13 species: Archae - 0; Bacteria - 2; Metazoa - 0; Fungi - 0; Plants - 66; Viruses - 0; Other Eukaryotes - 0 (source: NCBI BLink). | chr2:13082033-13084384 REVERSE LENGTH=480	AT2G30700.1 | Symbols: | unknown protein; BEST Arabidopsis thaliana protein match is: unknown protein (TAIR:AT1G61900.1); Has 68 Blast hits to 67 proteins in 13 species: Archae - 0; Bacteria - 2; Metazoa - 0; Fungi - 0; Plants - 66; Viruses - 0; Other Eukaryotes - 0 (source: NCBI BLink). | chr2:13082033-13084384 REVERSE LENGTH=480	LOC_Os10g38980.1 protein|expressed protein, LOC_Os10g38980.2 protein|expressed protein, LOC_Os10g38980.3 protein|expressed protein	LOC_Os10g38980.1 protein|expressed protein, LOC_Os10g38980.2 protein|expressed protein, LOC_Os10g38980.3 protein|expressed protein	LOC_Os10g38980.1 protein|expressed protein, LOC_Os10g38980.2 protein|expressed protein, LOC_Os10g38980.3 protein|expressed protein
Homoeologous triplet 152	TRIAE_CS42_1AL_TGACv1_000330_AA0009170	TRIAE_CS42_1BL_TGACv1_035098_AA0146170	TRIAE_CS42_1DL_TGACv1_061101_AA0185170	AB-D	1	1	4	0.878807	0.575745	0.773068	727	724	577	4	441	381	AT5G47570.1 | Symbols: | unknown protein; Has 30201 Blast hits to 17322 proteins in 780 species: Archae - 12; Bacteria - 1396; Metazoa - 17338; Fungi - 3422; Plants - 5037; Viruses - 0; Other Eukaryotes - 2996 (source: NCBI BLink). | chr5:19292869-19294666 REVERSE LENGTH=125	AT5G47570.1 | Symbols: | unknown protein; Has 30201 Blast hits to 17322 proteins in 780 species: Archae - 12; Bacteria - 1396; Metazoa - 17338; Fungi - 3422; Plants - 5037; Viruses - 0; Other Eukaryotes - 2996 (source: NCBI BLink). | chr5:19292869-19294666 REVERSE LENGTH=125	AT5G47570.1 | Symbols: | unknown protein; Has 30201 Blast hits to 17322 proteins in 780 species: Archae - 12; Bacteria - 1396; Metazoa - 17338; Fungi - 3422; Plants - 5037; Viruses - 0; Other Eukaryotes - 2996 (source: NCBI BLink). | chr5:19292869-19294666 REVERSE LENGTH=125	LOC_Os10g40410.1 protein|expressed protein, LOC_Os10g40410.2 protein|expressed protein	LOC_Os10g40410.1 protein|expressed protein, LOC_Os10g40410.2 protein|expressed protein	LOC_Os10g40410.1 protein|expressed protein, LOC_Os10g40410.2 protein|expressed protein
Homoeologous triplet 153	TRIAE_CS42_1AL_TGACv1_000333_AA0009290	TRIAE_CS42_1BL_TGACv1_032445_AA0129910	TRIAE_CS42_1DL_TGACv1_062226_AA0210880	ABD	3	3	3	0.928902	0.941143	0.877573	637	601	600	3	12	4	AT3G02600.1 | Symbols: LPP3, ATLPP3 | lipid phosphate phosphatase 3 | chr3:551534-554411 FORWARD LENGTH=364, AT3G02600.2 | Symbols: LPP3, ATLPP3 | lipid phosphate phosphatase 3 | chr3:551534-554411 FORWARD LENGTH=333, AT3G02600.3 | Symbols: LPP3, ATLPP3 | lipid phosphate phosphatase 3 | chr3:552937-554411 FORWARD LENGTH=314, AT3G02600.4 | Symbols: LPP3, ATLPP3 | lipid phosphate phosphatase 3 | ch…	AT3G02600.1 | Symbols: LPP3, ATLPP3 | lipid phosphate phosphatase 3 | chr3:551534-554411 FORWARD LENGTH=364, AT3G02600.2 | Symbols: LPP3, ATLPP3 | lipid phosphate phosphatase 3 | chr3:551534-554411 FORWARD LENGTH=333, AT3G02600.3 | Symbols: LPP3, ATLPP3 | lipid phosphate phosphatase 3 | chr3:552937-554411 FORWARD LENGTH=314, AT3G02600.4 | Symbols: LPP3, ATLPP3 | lipid phosphate phosphatase 3 | ch…	AT3G02600.1 | Symbols: LPP3, ATLPP3 | lipid phosphate phosphatase 3 | chr3:551534-554411 FORWARD LENGTH=364, AT3G02600.2 | Symbols: LPP3, ATLPP3 | lipid phosphate phosphatase 3 | chr3:551534-554411 FORWARD LENGTH=333, AT3G02600.3 | Symbols: LPP3, ATLPP3 | lipid phosphate phosphatase 3 | chr3:552937-554411 FORWARD LENGTH=314, AT3G02600.4 | Symbols: LPP3, ATLPP3 | lipid phosphate phosphatase 3 | ch…	LOC_Os05g47660.1 protein|lipid phosphatase protein, putative, expressed	LOC_Os05g47660.1 protein|lipid phosphatase protein, putative, expressed	LOC_Os05g47660.1 protein|lipid phosphatase protein, putative, expressed
Homoeologous triplet 154	TRIAE_CS42_1AL_TGACv1_000341_AA0009480	TRIAE_CS42_1BL_TGACv1_034320_AA0144200	TRIAE_CS42_1DL_TGACv1_061373_AA0193350	ABD	4	4	4	0.882473	0.881113	0.897077	321	429	340	1	1	2	AT1G20823.1 | Symbols: | RING/U-box superfamily protein | chr1:7238880-7239473 FORWARD LENGTH=197	AT1G20823.1 | Symbols: | RING/U-box superfamily protein | chr1:7238880-7239473 FORWARD LENGTH=197	AT1G20823.1 | Symbols: | RING/U-box superfamily protein | chr1:7238880-7239473 FORWARD LENGTH=197	LOC_Os10g39450.1 protein|RING-H2 finger protein, putative, expressed	LOC_Os10g39450.1 protein|RING-H2 finger protein, putative, expressed	LOC_Os10g39450.1 protein|RING-H2 finger protein, putative, expressed
Homoeologous triplet 155	TRIAE_CS42_1AL_TGACv1_000341_AA0009440	TRIAE_CS42_1BL_TGACv1_030856_AA0102420	TRIAE_CS42_1DL_TGACv1_063158_AA0224470	ABD	1	1	1	0.889276	0.915516	0.920011	239	286	276	84	47	28	AT2G17480.1 | Symbols: MLO8, ATMLO8 | Seven transmembrane MLO family protein | chr2:7590559-7593768 REVERSE LENGTH=593	AT2G33670.1 | Symbols: MLO5, ATMLO5 | Seven transmembrane MLO family protein | chr2:14245138-14247879 FORWARD LENGTH=501	AT2G33670.1 | Symbols: MLO5, ATMLO5 | Seven transmembrane MLO family protein | chr2:14245138-14247879 FORWARD LENGTH=501	LOC_Os10g39520.1 protein|MLO domain containing protein, putative, expressed	LOC_Os10g39520.1 protein|MLO domain containing protein, putative, expressed	LOC_Os10g39520.1 protein|MLO domain containing protein, putative, expressed
Homoeologous triplet 156	TRIAE_CS42_1AL_TGACv1_000351_AA0009690	TRIAE_CS42_1BL_TGACv1_033087_AA0136910	TRIAE_CS42_1DL_TGACv1_062768_AA0219590	AD-B	7	2	7	0.730368	0.772854	0.723096	548	405	178	34	264	119	AT3G59310.1 | Symbols: | Eukaryotic protein of unknown function (DUF914) | chr3:21922316-21924313 REVERSE LENGTH=332, AT3G59310.2 | Symbols: | Eukaryotic protein of unknown function (DUF914) | chr3:21922316-21924313 REVERSE LENGTH=363	AT3G59340.1 | Symbols: | Eukaryotic protein of unknown function (DUF914) | chr3:21928971-21931030 REVERSE LENGTH=333	AT3G59310.1 | Symbols: | Eukaryotic protein of unknown function (DUF914) | chr3:21922316-21924313 REVERSE LENGTH=332, AT3G59310.2 | Symbols: | Eukaryotic protein of unknown function (DUF914) | chr3:21922316-21924313 REVERSE LENGTH=363	LOC_Os05g37200.2 protein|solute carrier family 35 member F2, putative, expressed, LOC_Os05g37200.3 protein|solute carrier family 35 member F2, putative, expressed, LOC_Os05g37200.1 protein|solute carrier family 35 member F2, putative, expressed	LOC_Os05g37200.2 protein|solute carrier family 35 member F2, putative, expressed, LOC_Os05g37200.3 protein|solute carrier family 35 member F2, putative, expressed, LOC_Os05g37200.1 protein|solute carrier family 35 member F2, putative, expressed	LOC_Os05g37200.2 protein|solute carrier family 35 member F2, putative, expressed, LOC_Os05g37200.3 protein|solute carrier family 35 member F2, putative, expressed, LOC_Os05g37200.1 protein|solute carrier family 35 member F2, putative, expressed
Homoeologous triplet 157	TRIAE_CS42_1AL_TGACv1_000357_AA0009840	TRIAE_CS42_1BL_TGACv1_030267_AA0084630	TRIAE_CS42_1DL_TGACv1_061558_AA0198680	ABD	5	5	5	0.787145	0.887538	0.718758	56	43	58	9	15	19	AT4G02330.1 | Symbols: ATPMEPCRB | Plant invertase/pectin methylesterase inhibitor superfamily | chr4:1032479-1034928 FORWARD LENGTH=573	AT4G02330.1 | Symbols: ATPMEPCRB | Plant invertase/pectin methylesterase inhibitor superfamily | chr4:1032479-1034928 FORWARD LENGTH=573	AT4G02330.1 | Symbols: ATPMEPCRB | Plant invertase/pectin methylesterase inhibitor superfamily | chr4:1032479-1034928 FORWARD LENGTH=573	LOC_Os05g29790.1 protein|pectinesterase, putative, expressed	LOC_Os05g29790.1 protein|pectinesterase, putative, expressed	LOC_Os05g29790.1 protein|pectinesterase, putative, expressed
Homoeologous triplet 158	TRIAE_CS42_1AL_TGACv1_000360_AA0009890	TRIAE_CS42_1BL_TGACv1_031981_AA0123720	TRIAE_CS42_1DL_TGACv1_062733_AA0218920	ABD	7	7	7	0.935836	0.937302	0.914038	394	391	327	14	58	67	AT1G53300.1 | Symbols: TTL1 | tetratricopetide-repeat thioredoxin-like 1 | chr1:19879726-19882375 FORWARD LENGTH=699	AT1G53300.1 | Symbols: TTL1 | tetratricopetide-repeat thioredoxin-like 1 | chr1:19879726-19882375 FORWARD LENGTH=699	AT1G53300.1 | Symbols: TTL1 | tetratricopetide-repeat thioredoxin-like 1 | chr1:19879726-19882375 FORWARD LENGTH=699	LOC_Os01g42960.1 protein|TTL1, putative, expressed	LOC_Os01g42960.1 protein|TTL1, putative, expressed	LOC_Os01g42960.1 protein|TTL1, putative, expressed
Homoeologous triplet 159	TRIAE_CS42_1AL_TGACv1_000360_AA0009930	TRIAE_CS42_1BL_TGACv1_031127_AA0108270	TRIAE_CS42_1DL_TGACv1_062466_AA0214890	ABD	1	1	1	0.913035	0.808117	0.758296	487	405	491	8	16	35	AT4G27610.1 | Symbols: | unknown protein; BEST Arabidopsis thaliana protein match is: unknown protein (TAIR:AT4G27620.2); Has 1304 Blast hits to 1173 proteins in 200 species: Archae - 14; Bacteria - 115; Metazoa - 628; Fungi - 104; Plants - 95; Viruses - 8; Other Eukaryotes - 340 (source: NCBI BLink). | chr4:13785648-13787332 REVERSE LENGTH=334, AT4G27610.2 | Symbols: | unknown protein; BEST Arab…	AT4G27610.1 | Symbols: | unknown protein; BEST Arabidopsis thaliana protein match is: unknown protein (TAIR:AT4G27620.2); Has 1304 Blast hits to 1173 proteins in 200 species: Archae - 14; Bacteria - 115; Metazoa - 628; Fungi - 104; Plants - 95; Viruses - 8; Other Eukaryotes - 340 (source: NCBI BLink). | chr4:13785648-13787332 REVERSE LENGTH=334, AT4G27610.2 | Symbols: | unknown protein; BEST Arab…	AT4G27610.1 | Symbols: | unknown protein; BEST Arabidopsis thaliana protein match is: unknown protein (TAIR:AT4G27620.2); Has 1304 Blast hits to 1173 proteins in 200 species: Archae - 14; Bacteria - 115; Metazoa - 628; Fungi - 104; Plants - 95; Viruses - 8; Other Eukaryotes - 340 (source: NCBI BLink). | chr4:13785648-13787332 REVERSE LENGTH=334, AT4G27610.2 | Symbols: | unknown protein; BEST Arab…	LOC_Os05g51000.2 protein|expressed protein, LOC_Os05g51000.3 protein|expressed protein, LOC_Os05g51000.4 protein|expressed protein, LOC_Os05g51000.1 protein|expressed protein	LOC_Os05g51000.2 protein|expressed protein, LOC_Os05g51000.3 protein|expressed protein, LOC_Os05g51000.4 protein|expressed protein, LOC_Os05g51000.1 protein|expressed protein	LOC_Os05g51000.2 protein|expressed protein, LOC_Os05g51000.3 protein|expressed protein, LOC_Os05g51000.4 protein|expressed protein, LOC_Os05g51000.1 protein|expressed protein
Homoeologous triplet 160	TRIAE_CS42_1AL_TGACv1_000361_AA0010020	TRIAE_CS42_1BL_TGACv1_030397_AA0089470	TRIAE_CS42_1DL_TGACv1_061871_AA0205000	Not clustered	0	1	0	0.775819	0.928924	0.727931	694	723	683	173	13	78	AT3G60340.1 | Symbols: | alpha/beta-Hydrolases superfamily protein | chr3:22304395-22306389 FORWARD LENGTH=338, AT3G60340.2 | Symbols: | alpha/beta-Hydrolases superfamily protein | chr3:22304395-22306389 FORWARD LENGTH=338	AT3G60340.1 | Symbols: | alpha/beta-Hydrolases superfamily protein | chr3:22304395-22306389 FORWARD LENGTH=338, AT3G60340.2 | Symbols: | alpha/beta-Hydrolases superfamily protein | chr3:22304395-22306389 FORWARD LENGTH=338	AT3G60340.1 | Symbols: | alpha/beta-Hydrolases superfamily protein | chr3:22304395-22306389 FORWARD LENGTH=338, AT3G60340.2 | Symbols: | alpha/beta-Hydrolases superfamily protein | chr3:22304395-22306389 FORWARD LENGTH=338	LOC_Os10g41340.1 protein|palmitoyl-protein thioesterase 1 precursor, putative, expressed	LOC_Os10g41340.1 protein|palmitoyl-protein thioesterase 1 precursor, putative, expressed	LOC_Os10g41340.1 protein|palmitoyl-protein thioesterase 1 precursor, putative, expressed
Homoeologous triplet 161	TRIAE_CS42_1AL_TGACv1_000363_AA0010200	TRIAE_CS42_1BL_TGACv1_030423_AA0090300	TRIAE_CS42_1DL_TGACv1_061535_AA0198110	AB-D	2	2	6	0.899502	0.767657	0.77344	396	482	441	186	67	108	AT1G12110.1 | Symbols: NRT1.1, CHL1-1, NRT1, B-1, ATNRT1, CHL1 | nitrate transporter 1.1 | chr1:4105341-4109290 FORWARD LENGTH=590	AT1G12110.1 | Symbols: NRT1.1, CHL1-1, NRT1, B-1, ATNRT1, CHL1 | nitrate transporter 1.1 | chr1:4105341-4109290 FORWARD LENGTH=590	AT1G12110.1 | Symbols: NRT1.1, CHL1-1, NRT1, B-1, ATNRT1, CHL1 | nitrate transporter 1.1 | chr1:4105341-4109290 FORWARD LENGTH=590	LOC_Os10g40600.1 protein|peptide transporter PTR2, putative, expressed	LOC_Os10g40600.1 protein|peptide transporter PTR2, putative, expressed	LOC_Os10g40600.1 protein|peptide transporter PTR2, putative, expressed
Homoeologous triplet 162	TRIAE_CS42_1AL_TGACv1_000368_AA0010420	TRIAE_CS42_1BL_TGACv1_031955_AA0123410	TRIAE_CS42_4DL_TGACv1_342407_AA1112800	ABD	1	1	1	0.975311	0.992418	0.983942	99	74	76	18	14	0	AT3G04290.1 | Symbols: ATLTL1, LTL1 | Li-tolerant lipase 1 | chr3:1133620-1136223 REVERSE LENGTH=366	AT3G04290.1 | Symbols: ATLTL1, LTL1 | Li-tolerant lipase 1 | chr3:1133620-1136223 REVERSE LENGTH=366	AT3G04290.1 | Symbols: ATLTL1, LTL1 | Li-tolerant lipase 1 | chr3:1133620-1136223 REVERSE LENGTH=366	LOC_Os10g32580.1 protein|GDSL-like lipase/acylhydrolase, putative, expressed	LOC_Os10g32580.1 protein|GDSL-like lipase/acylhydrolase, putative, expressed	LOC_Os10g32580.1 protein|GDSL-like lipase/acylhydrolase, putative, expressed
Homoeologous triplet 163	TRIAE_CS42_1AL_TGACv1_000369_AA0010430	TRIAE_CS42_1BL_TGACv1_030411_AA0089860	TRIAE_CS42_1DL_TGACv1_062583_AA0216850	ABD	1	1	1	0.921032	0.951145	0.931253	709	709	714	2	0	9	AT4G00570.1 | Symbols: NAD-ME2 | NAD-dependent malic enzyme 2 | chr4:242817-246522 REVERSE LENGTH=607	AT4G00570.1 | Symbols: NAD-ME2 | NAD-dependent malic enzyme 2 | chr4:242817-246522 REVERSE LENGTH=607	AT4G00570.1 | Symbols: NAD-ME2 | NAD-dependent malic enzyme 2 | chr4:242817-246522 REVERSE LENGTH=607	LOC_Os10g35960.1 protein|NAD-dependent malic enzyme, mitochondrial precursor, putative, expressed, LOC_Os10g35960.2 protein|NAD-dependent malic enzyme, mitochondrial precursor, putative, expressed	LOC_Os10g35960.1 protein|NAD-dependent malic enzyme, mitochondrial precursor, putative, expressed, LOC_Os10g35960.2 protein|NAD-dependent malic enzyme, mitochondrial precursor, putative, expressed	LOC_Os10g35960.1 protein|NAD-dependent malic enzyme, mitochondrial precursor, putative, expressed, LOC_Os10g35960.2 protein|NAD-dependent malic enzyme, mitochondrial precursor, putative, expressed
Homoeologous triplet 164	TRIAE_CS42_1AL_TGACv1_000371_AA0010470	TRIAE_CS42_1BL_TGACv1_032587_AA0131700	TRIAE_CS42_1DL_TGACv1_061650_AA0201000	ABD	16	16	16	0.945744	0.956873	0.989617	467	485	519	1	2	0	AT3G21070.2 | Symbols: NADK1 | NAD kinase 1 | chr3:7380434-7383874 REVERSE LENGTH=524, AT3G21070.1 | Symbols: NADK1, ATNADK-1 | NAD kinase 1 | chr3:7380434-7383874 REVERSE LENGTH=530	AT3G21070.2 | Symbols: NADK1 | NAD kinase 1 | chr3:7380434-7383874 REVERSE LENGTH=524, AT3G21070.1 | Symbols: NADK1, ATNADK-1 | NAD kinase 1 | chr3:7380434-7383874 REVERSE LENGTH=530	AT3G21070.2 | Symbols: NADK1 | NAD kinase 1 | chr3:7380434-7383874 REVERSE LENGTH=524, AT3G21070.1 | Symbols: NADK1, ATNADK-1 | NAD kinase 1 | chr3:7380434-7383874 REVERSE LENGTH=530	LOC_Os05g32210.1 protein|NAD kinase, putative, expressed	LOC_Os05g32210.1 protein|NAD kinase, putative, expressed	LOC_Os05g32210.1 protein|NAD kinase, putative, expressed
Homoeologous triplet 165	TRIAE_CS42_1AL_TGACv1_000371_AA0010520	TRIAE_CS42_1BL_TGACv1_030996_AA0105370	TRIAE_CS42_1DL_TGACv1_062173_AA0209970	ABD	1	1	1	0.874818	0.940925	0.885152	568	593	526	3	0	5	AT5G48870.1 | Symbols: SAD1 | Small nuclear ribonucleoprotein family protein | chr5:19813407-19814362 FORWARD LENGTH=88	AT5G48870.1 | Symbols: SAD1 | Small nuclear ribonucleoprotein family protein | chr5:19813407-19814362 FORWARD LENGTH=88	AT5G48870.1 | Symbols: SAD1 | Small nuclear ribonucleoprotein family protein | chr5:19813407-19814362 FORWARD LENGTH=88	LOC_Os05g32310.1 protein|LSM domain containing protein, expressed	LOC_Os05g32310.1 protein|LSM domain containing protein, expressed	LOC_Os05g32310.1 protein|LSM domain containing protein, expressed
Homoeologous triplet 166	TRIAE_CS42_1AL_TGACv1_000371_AA0010490	TRIAE_CS42_1BL_TGACv1_033136_AA0137280	TRIAE_CS42_1DL_TGACv1_061650_AA0201040	ABD	2	2	2	0.961388	0.903924	0.88355	684	663	623	0	7	2	AT5G12470.1 | Symbols: | Protein of unknown function (DUF3411) | chr5:4044950-4047290 REVERSE LENGTH=386	AT5G12470.1 | Symbols: | Protein of unknown function (DUF3411) | chr5:4044950-4047290 REVERSE LENGTH=386	AT5G12470.1 | Symbols: | Protein of unknown function (DUF3411) | chr5:4044950-4047290 REVERSE LENGTH=386	LOC_Os05g32230.1 protein|expressed protein	LOC_Os05g32230.1 protein|expressed protein	LOC_Os05g32230.1 protein|expressed protein
Homoeologous triplet 167	TRIAE_CS42_1AL_TGACv1_000371_AA0010510	TRIAE_CS42_1BL_TGACv1_030996_AA0105380	TRIAE_CS42_1DL_TGACv1_062173_AA0209980	AB-D	1	1	7	0.933588	0.915928	0.926284	65	123	114	8	2	0	AT2G41710.1 | Symbols: | Integrase-type DNA-binding superfamily protein | chr2:17400274-17402903 REVERSE LENGTH=423, AT2G41710.2 | Symbols: | Integrase-type DNA-binding superfamily protein | chr2:17400274-17402903 REVERSE LENGTH=428, AT2G41710.3 | Symbols: | Integrase-type DNA-binding superfamily protein | chr2:17400274-17402903 REVERSE LENGTH=458	AT2G41710.1 | Symbols: | Integrase-type DNA-binding superfamily protein | chr2:17400274-17402903 REVERSE LENGTH=423, AT2G41710.2 | Symbols: | Integrase-type DNA-binding superfamily protein | chr2:17400274-17402903 REVERSE LENGTH=428, AT2G41710.3 | Symbols: | Integrase-type DNA-binding superfamily protein | chr2:17400274-17402903 REVERSE LENGTH=458	AT2G41710.1 | Symbols: | Integrase-type DNA-binding superfamily protein | chr2:17400274-17402903 REVERSE LENGTH=423, AT2G41710.2 | Symbols: | Integrase-type DNA-binding superfamily protein | chr2:17400274-17402903 REVERSE LENGTH=428, AT2G41710.3 | Symbols: | Integrase-type DNA-binding superfamily protein | chr2:17400274-17402903 REVERSE LENGTH=458	LOC_Os05g32270.1 protein|AP2 domain containing protein, expressed, LOC_Os05g32270.2 protein|AP2 domain containing protein, expressed	LOC_Os05g32270.1 protein|AP2 domain containing protein, expressed, LOC_Os05g32270.2 protein|AP2 domain containing protein, expressed	LOC_Os05g32270.1 protein|AP2 domain containing protein, expressed, LOC_Os05g32270.2 protein|AP2 domain containing protein, expressed
Homoeologous triplet 168	TRIAE_CS42_1AL_TGACv1_000371_AA0010480	TRIAE_CS42_1BL_TGACv1_032727_AA0133400	TRIAE_CS42_1DL_TGACv1_061650_AA0201010	ABD	2	2	2	0.962655	0.966414	0.990773	664	690	701	29	59	0	AT3G63490.1 | Symbols: | Ribosomal protein L1p/L10e family | chr3:23444269-23446020 FORWARD LENGTH=346, AT3G63490.2 | Symbols: | Ribosomal protein L1p/L10e family | chr3:23444269-23445777 FORWARD LENGTH=291	AT3G63490.1 | Symbols: | Ribosomal protein L1p/L10e family | chr3:23444269-23446020 FORWARD LENGTH=346, AT3G63490.2 | Symbols: | Ribosomal protein L1p/L10e family | chr3:23444269-23445777 FORWARD LENGTH=291	AT3G63490.1 | Symbols: | Ribosomal protein L1p/L10e family | chr3:23444269-23446020 FORWARD LENGTH=346, AT3G63490.2 | Symbols: | Ribosomal protein L1p/L10e family | chr3:23444269-23445777 FORWARD LENGTH=291	LOC_Os05g32220.1 protein|L1P family of ribosomal proteins domain containing protein, expressed	LOC_Os05g32220.1 protein|L1P family of ribosomal proteins domain containing protein, expressed	LOC_Os05g32220.1 protein|L1P family of ribosomal proteins domain containing protein, expressed
Homoeologous triplet 169	TRIAE_CS42_1AL_TGACv1_000375_AA0010560	TRIAE_CS42_1BL_TGACv1_030458_AA0091270	TRIAE_CS42_1DL_TGACv1_062535_AA0215980	BD-A	8	1	1	0.846978	0.788376	0.947076	228	639	691	528	647	0	AT2G35040.1 | Symbols: | AICARFT/IMPCHase bienzyme family protein | chr2:14765347-14768269 REVERSE LENGTH=596, AT2G35040.2 | Symbols: | AICARFT/IMPCHase bienzyme family protein | chr2:14765347-14768023 REVERSE LENGTH=545	AT2G35040.1 | Symbols: | AICARFT/IMPCHase bienzyme family protein | chr2:14765347-14768269 REVERSE LENGTH=596, AT2G35040.2 | Symbols: | AICARFT/IMPCHase bienzyme family protein | chr2:14765347-14768023 REVERSE LENGTH=545	AT2G35040.1 | Symbols: | AICARFT/IMPCHase bienzyme family protein | chr2:14765347-14768269 REVERSE LENGTH=596, AT2G35040.2 | Symbols: | AICARFT/IMPCHase bienzyme family protein | chr2:14765347-14768023 REVERSE LENGTH=545	LOC_Os08g10570.1 protein|bifunctional purine biosynthesis protein purH, putative, expressed, LOC_Os08g10570.2 protein|bifunctional purine biosynthesis protein purH, putative, expressed	LOC_Os08g10570.1 protein|bifunctional purine biosynthesis protein purH, putative, expressed, LOC_Os08g10570.2 protein|bifunctional purine biosynthesis protein purH, putative, expressed	LOC_Os08g10570.1 protein|bifunctional purine biosynthesis protein purH, putative, expressed, LOC_Os08g10570.2 protein|bifunctional purine biosynthesis protein purH, putative, expressed
Homoeologous triplet 170	TRIAE_CS42_1AL_TGACv1_000383_AA0010650	TRIAE_CS42_1BL_TGACv1_030603_AA0095450	TRIAE_CS42_1DL_TGACv1_061419_AA0194680	ABD	4	4	4	0.994235	0.989186	0.993988	79	87	69	5	6	8	No hits found	No hits found	No hits found	No hits found	No hits found	No hits found
Homoeologous triplet 171	TRIAE_CS42_1AL_TGACv1_000384_AA0010700	TRIAE_CS42_1BL_TGACv1_031136_AA0108400	TRIAE_CS42_1DL_TGACv1_062182_AA0210080	ABD	4	4	4	0.981465	0.970657	0.981573	53	71	109	4	39	10	AT5G58170.1 | Symbols: SVL5 | SHV3-like 5 | chr5:23540261-23543092 REVERSE LENGTH=750	AT5G58170.1 | Symbols: SVL5 | SHV3-like 5 | chr5:23540261-23543092 REVERSE LENGTH=750	AT5G58170.1 | Symbols: SVL5 | SHV3-like 5 | chr5:23540261-23543092 REVERSE LENGTH=750	LOC_Os02g09450.1 protein|glycerophosphoryl diester phosphodiesterase family protein, putative, expressed, LOC_Os02g09450.3 protein|glycerophosphoryl diester phosphodiesterase family protein, putative, expressed	LOC_Os02g09450.1 protein|glycerophosphoryl diester phosphodiesterase family protein, putative, expressed, LOC_Os02g09450.3 protein|glycerophosphoryl diester phosphodiesterase family protein, putative, expressed	LOC_Os02g09450.1 protein|glycerophosphoryl diester phosphodiesterase family protein, putative, expressed, LOC_Os02g09450.3 protein|glycerophosphoryl diester phosphodiesterase family protein, putative, expressed
Homoeologous triplet 172	TRIAE_CS42_1AL_TGACv1_000384_AA0010710	TRIAE_CS42_1BL_TGACv1_031136_AA0108420	TRIAE_CS42_1DL_TGACv1_062182_AA0210070	AD-B	6	2	6	0.661471	0.57358	0.734106	586	651	662	239	255	9	AT4G18240.1 | Symbols: ATSS4, SSIV, SS4 | starch synthase 4 | chr4:10082221-10087044 FORWARD LENGTH=1040	AT4G18240.1 | Symbols: ATSS4, SSIV, SS4 | starch synthase 4 | chr4:10082221-10087044 FORWARD LENGTH=1040	AT4G18240.1 | Symbols: ATSS4, SSIV, SS4 | starch synthase 4 | chr4:10082221-10087044 FORWARD LENGTH=1040	LOC_Os05g45720.1 protein|starch synthase, putative, expressed, LOC_Os05g45720.2 protein|starch synthase, putative, expressed, LOC_Os05g45720.3 protein|starch synthase, putative, expressed, LOC_Os05g45720.4 protein|starch synthase, putative, expressed	LOC_Os05g45720.1 protein|starch synthase, putative, expressed, LOC_Os05g45720.2 protein|starch synthase, putative, expressed, LOC_Os05g45720.3 protein|starch synthase, putative, expressed, LOC_Os05g45720.4 protein|starch synthase, putative, expressed	LOC_Os05g45720.1 protein|starch synthase, putative, expressed, LOC_Os05g45720.2 protein|starch synthase, putative, expressed, LOC_Os05g45720.3 protein|starch synthase, putative, expressed, LOC_Os05g45720.4 protein|starch synthase, putative, expressed
Homoeologous triplet 173	TRIAE_CS42_1AL_TGACv1_000388_AA0010880	TRIAE_CS42_1BL_TGACv1_032599_AA0131840	TRIAE_CS42_1DL_TGACv1_061701_AA0201930	ABD	1	1	1	0.916301	0.988468	0.872123	399	391	383	1	1	1	AT5G46280.1 | Symbols: MCM3 | Minichromosome maintenance (MCM2/3/5) family protein | chr5:18769902-18773606 REVERSE LENGTH=776	AT5G46280.1 | Symbols: MCM3 | Minichromosome maintenance (MCM2/3/5) family protein | chr5:18769902-18773606 REVERSE LENGTH=776	AT5G46280.1 | Symbols: MCM3 | Minichromosome maintenance (MCM2/3/5) family protein | chr5:18769902-18773606 REVERSE LENGTH=776	LOC_Os05g39850.1 protein|MCM3 - Putative minichromosome maintenance MCM complex subunit 3, expressed	LOC_Os05g39850.1 protein|MCM3 - Putative minichromosome maintenance MCM complex subunit 3, expressed	LOC_Os05g39850.1 protein|MCM3 - Putative minichromosome maintenance MCM complex subunit 3, expressed
Homoeologous triplet 174	TRIAE_CS42_1AL_TGACv1_000388_AA0010900	TRIAE_CS42_1BL_TGACv1_032599_AA0131830	TRIAE_CS42_1DL_TGACv1_061701_AA0201940	AD-B	4	2	4	0.494914	0.615676	0.81508	342	156	47	91	131	14	AT5G07070.1 | Symbols: CIPK2, SnRK3.2 | CBL-interacting protein kinase 2 | chr5:2196743-2198113 REVERSE LENGTH=456	AT5G58380.1 | Symbols: CIPK10, PKS2, SIP1, SNRK3.8 | SOS3-interacting protein 1 | chr5:23597092-23598531 REVERSE LENGTH=479	AT5G58380.1 | Symbols: CIPK10, PKS2, SIP1, SNRK3.8 | SOS3-interacting protein 1 | chr5:23597092-23598531 REVERSE LENGTH=479	LOC_Os05g39870.1 protein|CAMK_KIN1/SNF1/Nim1_like.24 - CAMK includes calcium/calmodulin depedent protein kinases, expressed	LOC_Os05g39870.1 protein|CAMK_KIN1/SNF1/Nim1_like.24 - CAMK includes calcium/calmodulin depedent protein kinases, expressed	LOC_Os05g39870.1 protein|CAMK_KIN1/SNF1/Nim1_like.24 - CAMK includes calcium/calmodulin depedent protein kinases, expressed
Homoeologous triplet 175	TRIAE_CS42_1AL_TGACv1_000388_AA0010860	TRIAE_CS42_1BL_TGACv1_032599_AA0131850	TRIAE_CS42_1DL_TGACv1_061701_AA0201920	ABD	1	1	1	0.93128	0.917329	0.873983	253	246	265	2	0	0	AT2G38370.1 | Symbols: | Plant protein of unknown function (DUF827) | chr2:16072184-16074168 REVERSE LENGTH=522	AT2G38370.1 | Symbols: | Plant protein of unknown function (DUF827) | chr2:16072184-16074168 REVERSE LENGTH=522	AT2G38370.1 | Symbols: | Plant protein of unknown function (DUF827) | chr2:16072184-16074168 REVERSE LENGTH=522	LOC_Os05g39840.1 protein|expressed protein	LOC_Os05g39840.1 protein|expressed protein	LOC_Os05g39840.1 protein|expressed protein
Homoeologous triplet 176	TRIAE_CS42_1AL_TGACv1_000398_AA0011150	TRIAE_CS42_1BL_TGACv1_033250_AA0138170	TRIAE_CS42_1DL_TGACv1_063964_AA0231980	AB-D	3	3	5	0.880479	0.858385	0.967938	622	603	619	4	9	2	AT3G18170.1 | Symbols: | Glycosyltransferase family 61 protein | chr3:6228393-6229547 FORWARD LENGTH=384	AT3G18170.1 | Symbols: | Glycosyltransferase family 61 protein | chr3:6228393-6229547 FORWARD LENGTH=384	AT3G18170.1 | Symbols: | Glycosyltransferase family 61 protein | chr3:6228393-6229547 FORWARD LENGTH=384	LOC_Os03g37010.1 protein|glycosyltransferase, putative, expressed, LOC_Os03g37010.3 protein|glycosyltransferase, putative, expressed, LOC_Os03g37010.2 protein|glycosyltransferase, putative, expressed	LOC_Os03g37010.1 protein|glycosyltransferase, putative, expressed, LOC_Os03g37010.3 protein|glycosyltransferase, putative, expressed, LOC_Os03g37010.2 protein|glycosyltransferase, putative, expressed	LOC_Os03g37010.1 protein|glycosyltransferase, putative, expressed, LOC_Os03g37010.3 protein|glycosyltransferase, putative, expressed, LOC_Os03g37010.2 protein|glycosyltransferase, putative, expressed
Homoeologous triplet 177	TRIAE_CS42_1AL_TGACv1_000399_AA0011160	TRIAE_CS42_1BL_TGACv1_030734_AA0099440	TRIAE_CS42_1DL_TGACv1_061085_AA0184600	ABD	1	1	1	0.803981	0.799581	0.898838	425	444	440	56	31	40	AT3G08860.1 | Symbols: PYD4 | PYRIMIDINE 4 | chr3:2696754-2699087 REVERSE LENGTH=481	AT3G08860.1 | Symbols: PYD4 | PYRIMIDINE 4 | chr3:2696754-2699087 REVERSE LENGTH=481	AT3G08860.1 | Symbols: PYD4 | PYRIMIDINE 4 | chr3:2696754-2699087 REVERSE LENGTH=481	LOC_Os05g39770.1 protein|aminotransferase, putative, expressed, LOC_Os05g39770.2 protein|aminotransferase, putative, expressed	LOC_Os05g39770.1 protein|aminotransferase, putative, expressed, LOC_Os05g39770.2 protein|aminotransferase, putative, expressed	LOC_Os05g39770.1 protein|aminotransferase, putative, expressed, LOC_Os05g39770.2 protein|aminotransferase, putative, expressed
Homoeologous triplet 178	TRIAE_CS42_1AL_TGACv1_000403_AA0011210	TRIAE_CS42_1BL_TGACv1_033382_AA0139040	TRIAE_CS42_1DL_TGACv1_061676_AA0201470	AD-B	8	1	8	0.902157	0.936758	0.956204	571	487	597	18	25	31	AT5G04560.1 | Symbols: DME | HhH-GPD base excision DNA repair family protein | chr5:1310671-1318091 FORWARD LENGTH=1729, AT5G04560.2 | Symbols: DME | HhH-GPD base excision DNA repair family protein | chr5:1309786-1318091 FORWARD LENGTH=1987	AT5G04560.1 | Symbols: DME | HhH-GPD base excision DNA repair family protein | chr5:1310671-1318091 FORWARD LENGTH=1729, AT5G04560.2 | Symbols: DME | HhH-GPD base excision DNA repair family protein | chr5:1309786-1318091 FORWARD LENGTH=1987	AT5G04560.1 | Symbols: DME | HhH-GPD base excision DNA repair family protein | chr5:1310671-1318091 FORWARD LENGTH=1729, AT5G04560.2 | Symbols: DME | HhH-GPD base excision DNA repair family protein | chr5:1309786-1318091 FORWARD LENGTH=1987	LOC_Os05g37410.1 protein|hhH-GPD superfamily base excision DNA repair protein, expressed	LOC_Os05g37350.1 protein|hhH-GPD superfamily base excision DNA repair protein, expressed	LOC_Os05g37350.1 protein|hhH-GPD superfamily base excision DNA repair protein, expressed
Homoeologous triplet 179	TRIAE_CS42_1AL_TGACv1_000405_AA0011270	TRIAE_CS42_1BL_TGACv1_031234_AA0110060	TRIAE_CS42_1DL_TGACv1_063447_AA0227370	ABD	1	1	1	0.774989	0.79484	0.679123	697	625	696	73	0	139	AT3G10980.1 | Symbols: | PLAC8 family protein | chr3:3438810-3440501 FORWARD LENGTH=563	AT3G10980.1 | Symbols: | PLAC8 family protein | chr3:3438810-3440501 FORWARD LENGTH=563	AT3G10980.1 | Symbols: | PLAC8 family protein | chr3:3438810-3440501 FORWARD LENGTH=563	LOC_Os05g39730.1 protein|SAG20, putative, expressed	LOC_Os05g39730.1 protein|SAG20, putative, expressed	LOC_Os05g39730.1 protein|SAG20, putative, expressed
Homoeologous triplet 180	TRIAE_CS42_1AL_TGACv1_000405_AA0011280	TRIAE_CS42_1BL_TGACv1_031863_AA0121910	TRIAE_CS42_1DL_TGACv1_061880_AA0205230	ABD	9	9	9	0.98506	0.993584	0.977407	117	113	137	0	4	3	AT2G38470.1 | Symbols: WRKY33, ATWRKY33 | WRKY DNA-binding protein 33 | chr2:16108476-16110539 FORWARD LENGTH=519	AT2G38470.1 | Symbols: WRKY33, ATWRKY33 | WRKY DNA-binding protein 33 | chr2:16108476-16110539 FORWARD LENGTH=519	AT2G38470.1 | Symbols: WRKY33, ATWRKY33 | WRKY DNA-binding protein 33 | chr2:16108476-16110539 FORWARD LENGTH=519	LOC_Os05g39720.1 protein|WRKY70, expressed	LOC_Os05g39720.1 protein|WRKY70, expressed	LOC_Os05g39720.1 protein|WRKY70, expressed
Homoeologous triplet 181	TRIAE_CS42_1AL_TGACv1_000410_AA0011450	TRIAE_CS42_1BL_TGACv1_030549_AA0093760	TRIAE_CS42_1DL_TGACv1_061108_AA0185600	ABD	1	1	1	0.97105	0.987932	0.969067	279	321	276	14	0	15	AT5G67270.1 | Symbols: ATEB1C, EB1C, ATEB1H1 | end binding protein 1C | chr5:26840248-26841984 REVERSE LENGTH=329	AT5G67270.1 | Symbols: ATEB1C, EB1C, ATEB1H1 | end binding protein 1C | chr5:26840248-26841984 REVERSE LENGTH=329	AT5G67270.1 | Symbols: ATEB1C, EB1C, ATEB1H1 | end binding protein 1C | chr5:26840248-26841984 REVERSE LENGTH=329	LOC_Os10g35580.1 protein|ATEB1A-like microtubule associated protein, putative, expressed	LOC_Os10g35580.1 protein|ATEB1A-like microtubule associated protein, putative, expressed	LOC_Os10g35580.1 protein|ATEB1A-like microtubule associated protein, putative, expressed
Homoeologous triplet 182	TRIAE_CS42_1AL_TGACv1_000412_AA0011510	TRIAE_CS42_1BL_TGACv1_031523_AA0115550	TRIAE_CS42_1DL_TGACv1_061746_AA0202810	AB-D	1	1	0	0.607181	0.894145	0.642279	631	559	589	62	21	20	AT5G22920.1 | Symbols: | CHY-type/CTCHY-type/RING-type Zinc finger protein | chr5:7665143-7667031 FORWARD LENGTH=291	AT5G22920.1 | Symbols: | CHY-type/CTCHY-type/RING-type Zinc finger protein | chr5:7665143-7667031 FORWARD LENGTH=291	AT5G22920.1 | Symbols: | CHY-type/CTCHY-type/RING-type Zinc finger protein | chr5:7665143-7667031 FORWARD LENGTH=291	LOC_Os10g31850.1 protein|RING finger and CHY zinc finger domain-containing protein 1, putative, expressed, LOC_Os10g31850.2 protein|RING finger and CHY zinc finger domain-containing protein 1, putative, expressed, LOC_Os10g31850.5 protein|RING finger and CHY zinc finger domain-containing protein 1, putative, expressed	LOC_Os10g31850.1 protein|RING finger and CHY zinc finger domain-containing protein 1, putative, expressed, LOC_Os10g31850.2 protein|RING finger and CHY zinc finger domain-containing protein 1, putative, expressed, LOC_Os10g31850.5 protein|RING finger and CHY zinc finger domain-containing protein 1, putative, expressed	LOC_Os10g31850.1 protein|RING finger and CHY zinc finger domain-containing protein 1, putative, expressed, LOC_Os10g31850.2 protein|RING finger and CHY zinc finger domain-containing protein 1, putative, expressed, LOC_Os10g31850.5 protein|RING finger and CHY zinc finger domain-containing protein 1, putative, expressed
Homoeologous triplet 183	TRIAE_CS42_1AL_TGACv1_000426_AA0011850	TRIAE_CS42_1BL_TGACv1_032171_AA0126270	TRIAE_CS42_1DL_TGACv1_063738_AA0230350	AD-B	1	0	1	0.492721	0.84064	0.551155	361	545	163	194	85	327	AT4G28706.1 | Symbols: | pfkB-like carbohydrate kinase family protein | chr4:14167805-14170619 FORWARD LENGTH=401, AT4G28706.3 | Symbols: | pfkB-like carbohydrate kinase family protein | chr4:14167805-14170619 FORWARD LENGTH=403, AT4G28706.2 | Symbols: | pfkB-like carbohydrate kinase family protein | chr4:14167805-14170619 FORWARD LENGTH=404, AT4G28706.4 | Symbols: | pfkB-like carbohydrate kinase…	AT4G28706.1 | Symbols: | pfkB-like carbohydrate kinase family protein | chr4:14167805-14170619 FORWARD LENGTH=401, AT4G28706.3 | Symbols: | pfkB-like carbohydrate kinase family protein | chr4:14167805-14170619 FORWARD LENGTH=403, AT4G28706.2 | Symbols: | pfkB-like carbohydrate kinase family protein | chr4:14167805-14170619 FORWARD LENGTH=404, AT4G28706.4 | Symbols: | pfkB-like carbohydrate kinase…	AT4G28706.1 | Symbols: | pfkB-like carbohydrate kinase family protein | chr4:14167805-14170619 FORWARD LENGTH=401, AT4G28706.3 | Symbols: | pfkB-like carbohydrate kinase family protein | chr4:14167805-14170619 FORWARD LENGTH=403, AT4G28706.2 | Symbols: | pfkB-like carbohydrate kinase family protein | chr4:14167805-14170619 FORWARD LENGTH=404, AT4G28706.4 | Symbols: | pfkB-like carbohydrate kinase…	LOC_Os10g32830.1 protein|kinase, pfkB family, putative, expressed	LOC_Os10g32830.1 protein|kinase, pfkB family, putative, expressed	LOC_Os10g32830.1 protein|kinase, pfkB family, putative, expressed
Homoeologous triplet 184	TRIAE_CS42_1AL_TGACv1_000433_AA0012040	TRIAE_CS42_1BL_TGACv1_030731_AA0099330	TRIAE_CS42_1DL_TGACv1_061831_AA0204060	ABD	6	6	6	0.773776	0.952225	0.82498	128	137	134	5	1	4	AT5G24930.1 | Symbols: ATCOL4, COL4 | CONSTANS-like 4 | chr5:8589325-8590949 FORWARD LENGTH=406	AT5G24930.1 | Symbols: ATCOL4, COL4 | CONSTANS-like 4 | chr5:8589325-8590949 FORWARD LENGTH=406	AT5G24930.1 | Symbols: ATCOL4, COL4 | CONSTANS-like 4 | chr5:8589325-8590949 FORWARD LENGTH=406	LOC_Os10g41100.1 protein|CCT motif family protein, expressed	LOC_Os10g41100.1 protein|CCT motif family protein, expressed	LOC_Os10g41100.1 protein|CCT motif family protein, expressed
Homoeologous triplet 185	TRIAE_CS42_1AL_TGACv1_000434_AA0012080	TRIAE_CS42_1BL_TGACv1_032654_AA0132390	TRIAE_CS42_1DL_TGACv1_064351_AA0234110	AB-D	8	8	11	0.64915	0.810271	0.817529	723	715	722	18	4	6	AT4G35140.1 | Symbols: | Transducin/WD40 repeat-like superfamily protein | chr4:16723873-16726477 REVERSE LENGTH=496	AT4G35140.1 | Symbols: | Transducin/WD40 repeat-like superfamily protein | chr4:16723873-16726477 REVERSE LENGTH=496	AT4G35140.1 | Symbols: | Transducin/WD40 repeat-like superfamily protein | chr4:16723873-16726477 REVERSE LENGTH=496	LOC_Os10g39760.1 protein|WD domain, G-beta repeat domain containing protein, expressed	LOC_Os10g39760.1 protein|WD domain, G-beta repeat domain containing protein, expressed	LOC_Os10g39760.1 protein|WD domain, G-beta repeat domain containing protein, expressed
Homoeologous triplet 186	TRIAE_CS42_1AL_TGACv1_000443_AA0012190	TRIAE_CS42_1BL_TGACv1_030480_AA0092070	TRIAE_CS42_1DL_TGACv1_062808_AA0220350	ABD	1	1	1	0.956699	0.968701	0.971682	705	723	719	7	1	0	AT4G39050.1 | Symbols: | Kinesin motor family protein | chr4:18193462-18200148 FORWARD LENGTH=1055	AT4G39050.1 | Symbols: | Kinesin motor family protein | chr4:18193462-18200148 FORWARD LENGTH=1055	AT4G39050.1 | Symbols: | Kinesin motor family protein | chr4:18193462-18200148 FORWARD LENGTH=1055	LOC_Os10g36880.1 protein|kinesin motor domain containing protein, putative, expressed	LOC_Os10g36880.1 protein|kinesin motor domain containing protein, putative, expressed	LOC_Os10g36880.1 protein|kinesin motor domain containing protein, putative, expressed
Homoeologous triplet 187	TRIAE_CS42_1AL_TGACv1_000446_AA0012260	TRIAE_CS42_1BL_TGACv1_030388_AA0089170	TRIAE_CS42_1DL_TGACv1_064713_AA0235470	ABD	1	1	1	0.953004	0.923695	0.926411	538	531	604	2	11	5	AT1G08130.1 | Symbols: ATLIG1, LIG1 | DNA ligase 1 | chr1:2542913-2547815 REVERSE LENGTH=790	AT1G08130.1 | Symbols: ATLIG1, LIG1 | DNA ligase 1 | chr1:2542913-2547815 REVERSE LENGTH=790	AT1G08130.1 | Symbols: ATLIG1, LIG1 | DNA ligase 1 | chr1:2542913-2547815 REVERSE LENGTH=790	LOC_Os10g34750.1 protein|LIG1 - Putative DNA ligase I, expressed, LOC_Os10g34750.2 protein|LIG1 - Putative DNA ligase I, expressed	LOC_Os10g34750.1 protein|LIG1 - Putative DNA ligase I, expressed, LOC_Os10g34750.2 protein|LIG1 - Putative DNA ligase I, expressed	LOC_Os10g34750.1 protein|LIG1 - Putative DNA ligase I, expressed, LOC_Os10g34750.2 protein|LIG1 - Putative DNA ligase I, expressed
Homoeologous triplet 188	TRIAE_CS42_1AL_TGACv1_000449_AA0012290	TRIAE_CS42_1BL_TGACv1_031146_AA0108660	TRIAE_CS42_1DL_TGACv1_061302_AA0191800	ABD	1	1	1	0.832226	0.823299	0.642955	627	580	49	1	589	339	AT1G65810.1 | Symbols: | P-loop containing nucleoside triphosphate hydrolases superfamily protein | chr1:24477043-24480728 REVERSE LENGTH=1050, AT1G65810.2 | Symbols: | P-loop containing nucleoside triphosphate hydrolases superfamily protein | chr1:24477043-24480728 REVERSE LENGTH=1016	AT5G52090.1 | Symbols: | P-loop containing nucleoside triphosphate hydrolases superfamily protein | chr5:21167432-21169462 REVERSE LENGTH=676	AT5G52090.1 | Symbols: | P-loop containing nucleoside triphosphate hydrolases superfamily protein | chr5:21167432-21169462 REVERSE LENGTH=676	LOC_Os10g39230.1 protein|tRNA-splicing endonuclease positive effector-related, putative, expressed	LOC_Os10g39230.1 protein|tRNA-splicing endonuclease positive effector-related, putative, expressed	LOC_Os10g39230.1 protein|tRNA-splicing endonuclease positive effector-related, putative, expressed
Homoeologous triplet 189	TRIAE_CS42_1AL_TGACv1_000450_AA0012320	TRIAE_CS42_1BL_TGACv1_032051_AA0124700	TRIAE_CS42_1DS_TGACv1_080149_AA0241490	ABD	1	1	1	0.81493	0.867383	0.743427	85	330	135	257	5	230	AT1G44110.1 | Symbols: CYCA1;1 | Cyclin A1;1 | chr1:16775035-16777182 REVERSE LENGTH=460	AT1G44110.1 | Symbols: CYCA1;1 | Cyclin A1;1 | chr1:16775035-16777182 REVERSE LENGTH=460	AT1G44110.1 | Symbols: CYCA1;1 | Cyclin A1;1 | chr1:16775035-16777182 REVERSE LENGTH=460	LOC_Os01g13260.1 protein|cyclin-A1, putative, expressed	LOC_Os05g14730.2 protein|cyclin-A1, putative, expressed, LOC_Os05g14730.1 protein|cyclin-A1, putative, expressed	LOC_Os01g13260.1 protein|cyclin-A1, putative, expressed
Homoeologous triplet 190	TRIAE_CS42_1AL_TGACv1_000453_AA0012390	TRIAE_CS42_1BL_TGACv1_034151_AA0143640	TRIAE_CS42_1DL_TGACv1_061101_AA0185260	AD-B	3	0	3	0.911523	0.966431	0.92069	360	335	467	7	16	38	AT4G22590.1 | Symbols: TPPG | Haloacid dehalogenase-like hydrolase (HAD) superfamily protein | chr4:11893707-11895371 REVERSE LENGTH=377	AT4G22590.1 | Symbols: TPPG | Haloacid dehalogenase-like hydrolase (HAD) superfamily protein | chr4:11893707-11895371 REVERSE LENGTH=377	AT4G22590.1 | Symbols: TPPG | Haloacid dehalogenase-like hydrolase (HAD) superfamily protein | chr4:11893707-11895371 REVERSE LENGTH=377	LOC_Os10g40550.1 protein|CPuORF23 - conserved peptide uORF-containing transcript, expressed, LOC_Os10g40550.2 protein|CPuORF23 - conserved peptide uORF-containing transcript, expressed	LOC_Os10g40550.1 protein|CPuORF23 - conserved peptide uORF-containing transcript, expressed, LOC_Os10g40550.2 protein|CPuORF23 - conserved peptide uORF-containing transcript, expressed	LOC_Os10g40550.1 protein|CPuORF23 - conserved peptide uORF-containing transcript, expressed, LOC_Os10g40550.2 protein|CPuORF23 - conserved peptide uORF-containing transcript, expressed
Homoeologous triplet 191	TRIAE_CS42_1AL_TGACv1_000453_AA0012350	TRIAE_CS42_1BL_TGACv1_033338_AA0138830	TRIAE_CS42_1DL_TGACv1_061101_AA0185240	AD-B	1	0	1	0.436403	0.857929	0.381456	727	684	727	169	0	194	AT4G26620.1 | Symbols: | Sucrase/ferredoxin-like family protein | chr4:13427599-13429877 REVERSE LENGTH=443	AT4G26620.1 | Symbols: | Sucrase/ferredoxin-like family protein | chr4:13427599-13429877 REVERSE LENGTH=443	AT4G26620.1 | Symbols: | Sucrase/ferredoxin-like family protein | chr4:13427599-13429877 REVERSE LENGTH=443	LOC_Os02g49320.1 protein|sucrase-related, putative, expressed	LOC_Os02g49320.1 protein|sucrase-related, putative, expressed	LOC_Os02g49320.1 protein|sucrase-related, putative, expressed
Homoeologous triplet 192	TRIAE_CS42_1AL_TGACv1_000453_AA0012380	TRIAE_CS42_1BL_TGACv1_034151_AA0143630	TRIAE_CS42_1DL_TGACv1_061101_AA0185250	ABD	1	1	1	0.804433	0.829901	0.933964	470	652	629	134	116	0	AT4G31810.1 | Symbols: | ATP-dependent caseinolytic (Clp) protease/crotonase family protein | chr4:15387365-15390290 REVERSE LENGTH=409	AT4G31810.1 | Symbols: | ATP-dependent caseinolytic (Clp) protease/crotonase family protein | chr4:15387365-15390290 REVERSE LENGTH=409	AT4G31810.1 | Symbols: | ATP-dependent caseinolytic (Clp) protease/crotonase family protein | chr4:15387365-15390290 REVERSE LENGTH=409	LOC_Os10g40540.1 protein|enoyl-CoA hydratase/isomerase family protein, putative, expressed	LOC_Os10g40540.1 protein|enoyl-CoA hydratase/isomerase family protein, putative, expressed	LOC_Os10g40540.1 protein|enoyl-CoA hydratase/isomerase family protein, putative, expressed
Homoeologous triplet 193	TRIAE_CS42_1AL_TGACv1_000454_AA0012430	TRIAE_CS42_1BL_TGACv1_032826_AA0134520	TRIAE_CS42_1DL_TGACv1_062221_AA0210720	BD-A	1	7	7	0.764612	0.75781	0.895414	271	165	146	52	42	2	AT3G60390.1 | Symbols: HAT3 | homeobox-leucine zipper protein 3 | chr3:22320788-22322370 REVERSE LENGTH=315	AT3G60390.1 | Symbols: HAT3 | homeobox-leucine zipper protein 3 | chr3:22320788-22322370 REVERSE LENGTH=315	AT3G60390.1 | Symbols: HAT3 | homeobox-leucine zipper protein 3 | chr3:22320788-22322370 REVERSE LENGTH=315	LOC_Os10g41230.1 protein|homeobox associated leucine zipper, putative, expressed	LOC_Os10g41230.1 protein|homeobox associated leucine zipper, putative, expressed	LOC_Os10g41230.1 protein|homeobox associated leucine zipper, putative, expressed
Homoeologous triplet 194	TRIAE_CS42_1AL_TGACv1_000454_AA0012410	TRIAE_CS42_1BL_TGACv1_032135_AA0125830	TRIAE_CS42_1DL_TGACv1_063684_AA0229850	AD-B	1	5	1	0.821591	0.880151	0.852261	96	128	142	2	3	1	AT3G60380.1 | Symbols: | FUNCTIONS IN: molecular_function unknown; INVOLVED IN: biological_process unknown; LOCATED IN: cellular_component unknown; EXPRESSED IN: 24 plant structures; EXPRESSED DURING: 13 growth stages; BEST Arabidopsis thaliana protein match is: hydroxyproline-rich glycoprotein family protein (TAIR:AT4G16790.1); Has 6102 Blast hits to 3981 proteins in 424 species: Archae - 6; Bac…	AT3G60380.1 | Symbols: | FUNCTIONS IN: molecular_function unknown; INVOLVED IN: biological_process unknown; LOCATED IN: cellular_component unknown; EXPRESSED IN: 24 plant structures; EXPRESSED DURING: 13 growth stages; BEST Arabidopsis thaliana protein match is: hydroxyproline-rich glycoprotein family protein (TAIR:AT4G16790.1); Has 6102 Blast hits to 3981 proteins in 424 species: Archae - 6; Bac…	AT3G60380.1 | Symbols: | FUNCTIONS IN: molecular_function unknown; INVOLVED IN: biological_process unknown; LOCATED IN: cellular_component unknown; EXPRESSED IN: 24 plant structures; EXPRESSED DURING: 13 growth stages; BEST Arabidopsis thaliana protein match is: hydroxyproline-rich glycoprotein family protein (TAIR:AT4G16790.1); Has 6102 Blast hits to 3981 proteins in 424 species: Archae - 6; Bac…	LOC_Os10g41250.1 protein|glycoprotein, putative, expressed	LOC_Os10g41250.1 protein|glycoprotein, putative, expressed	LOC_Os10g41250.1 protein|glycoprotein, putative, expressed
Homoeologous triplet 195	TRIAE_CS42_1AL_TGACv1_000454_AA0012420	TRIAE_CS42_1BL_TGACv1_034898_AA0145760	TRIAE_CS42_1DL_TGACv1_062221_AA0210730	AD-B	1	8	1	0.465813	0.828405	0.595853	118	47	162	102	23	103	No hits found	No hits found	No hits found	LOC_Os02g16220.1 protein|expressed protein	LOC_Os02g16220.1 protein|expressed protein	LOC_Os02g16220.1 protein|expressed protein
Homoeologous triplet 196	TRIAE_CS42_1AL_TGACv1_000456_AA0012510	TRIAE_CS42_1BL_TGACv1_031113_AA0108080	TRIAE_CS42_1DL_TGACv1_063167_AA0224540	ABD	2	2	2	0.947303	0.929726	0.931386	477	518	429	42	55	41	AT1G65680.1 | Symbols: ATEXPB2, EXPB2, ATHEXP BETA 1.4 | expansin B2 | chr1:24427266-24428399 FORWARD LENGTH=273	AT1G65680.1 | Symbols: ATEXPB2, EXPB2, ATHEXP BETA 1.4 | expansin B2 | chr1:24427266-24428399 FORWARD LENGTH=273	AT1G65680.1 | Symbols: ATEXPB2, EXPB2, ATHEXP BETA 1.4 | expansin B2 | chr1:24427266-24428399 FORWARD LENGTH=273	LOC_Os10g40700.1 protein|expansin precursor, putative, expressed	LOC_Os10g40700.1 protein|expansin precursor, putative, expressed	LOC_Os10g40700.1 protein|expansin precursor, putative, expressed
Homoeologous triplet 197	TRIAE_CS42_1AL_TGACv1_000457_AA0012560	TRIAE_CS42_1BL_TGACv1_032219_AA0126980	TRIAE_CS42_1DL_TGACv1_063317_AA0226240	ABD	6	6	6	0.849675	0.891004	0.913181	532	377	531	96	6	88	AT1G19715.1 | Symbols: | Mannose-binding lectin superfamily protein | chr1:6816934-6819432 REVERSE LENGTH=595, AT1G19715.2 | Symbols: | Mannose-binding lectin superfamily protein | chr1:6816934-6819244 REVERSE LENGTH=571, AT1G19715.3 | Symbols: | Mannose-binding lectin superfamily protein | chr1:6816934-6819432 REVERSE LENGTH=601	AT1G19715.1 | Symbols: | Mannose-binding lectin superfamily protein | chr1:6816934-6819432 REVERSE LENGTH=595, AT1G19715.2 | Symbols: | Mannose-binding lectin superfamily protein | chr1:6816934-6819244 REVERSE LENGTH=571, AT1G19715.3 | Symbols: | Mannose-binding lectin superfamily protein | chr1:6816934-6819432 REVERSE LENGTH=601	AT1G19715.1 | Symbols: | Mannose-binding lectin superfamily protein | chr1:6816934-6819432 REVERSE LENGTH=595, AT1G19715.2 | Symbols: | Mannose-binding lectin superfamily protein | chr1:6816934-6819244 REVERSE LENGTH=571, AT1G19715.3 | Symbols: | Mannose-binding lectin superfamily protein | chr1:6816934-6819432 REVERSE LENGTH=601	LOC_Os05g43240.2 protein|jacalin-like lectin domain containing protein, expressed, LOC_Os05g43240.1 protein|jacalin-like lectin domain containing protein, expressed, LOC_Os05g43240.3 protein|jacalin-like lectin domain containing protein, expressed	LOC_Os05g43240.2 protein|jacalin-like lectin domain containing protein, expressed, LOC_Os05g43240.1 protein|jacalin-like lectin domain containing protein, expressed, LOC_Os05g43240.3 protein|jacalin-like lectin domain containing protein, expressed	LOC_Os05g43240.2 protein|jacalin-like lectin domain containing protein, expressed, LOC_Os05g43240.1 protein|jacalin-like lectin domain containing protein, expressed, LOC_Os05g43240.3 protein|jacalin-like lectin domain containing protein, expressed
Homoeologous triplet 198	TRIAE_CS42_1AL_TGACv1_000457_AA0012550	TRIAE_CS42_1BL_TGACv1_032219_AA0126990	TRIAE_CS42_1DL_TGACv1_063317_AA0226230	ABD	1	1	1	0.702916	0.75006	0.784316	688	673	685	20	47	52	AT1G09850.1 | Symbols: XBCP3 | xylem bark cysteine peptidase 3 | chr1:3201848-3203875 FORWARD LENGTH=437	AT1G09850.1 | Symbols: XBCP3 | xylem bark cysteine peptidase 3 | chr1:3201848-3203875 FORWARD LENGTH=437	AT1G09850.1 | Symbols: XBCP3 | xylem bark cysteine peptidase 3 | chr1:3201848-3203875 FORWARD LENGTH=437	LOC_Os05g43230.1 protein|oryzain alpha chain precursor, putative, expressed	LOC_Os05g43230.1 protein|oryzain alpha chain precursor, putative, expressed	LOC_Os05g43230.1 protein|oryzain alpha chain precursor, putative, expressed
Homoeologous triplet 199	TRIAE_CS42_1AL_TGACv1_000458_AA0012590	TRIAE_CS42_1BL_TGACv1_030711_AA0098570	TRIAE_CS42_1DL_TGACv1_061719_AA0202300	ABD	3	3	3	0.901792	0.852094	0.798349	509	431	267	29	151	92	AT2G26570.1 | Symbols: WEB1 | Plant protein of unknown function (DUF827) | chr2:11299565-11302076 FORWARD LENGTH=807	AT2G26570.1 | Symbols: WEB1 | Plant protein of unknown function (DUF827) | chr2:11299565-11302076 FORWARD LENGTH=807	AT2G26570.1 | Symbols: WEB1 | Plant protein of unknown function (DUF827) | chr2:11299565-11302076 FORWARD LENGTH=807	LOC_Os03g27800.1 protein|paramyosin, putative, expressed	LOC_Os03g27800.1 protein|paramyosin, putative, expressed	LOC_Os03g27800.1 protein|paramyosin, putative, expressed
Homoeologous triplet 200	TRIAE_CS42_1AL_TGACv1_000462_AA0012630	TRIAE_CS42_1BL_TGACv1_032937_AA0135610	TRIAE_CS42_1DL_TGACv1_064006_AA0232090	AD-B	1	7	1	0.862917	0.947544	0.923576	458	518	483	2	0	1	AT4G17870.1 | Symbols: PYR1, RCAR11 | Polyketide cyclase/dehydrase and lipid transport superfamily protein | chr4:9928792-9929367 FORWARD LENGTH=191	AT4G17870.1 | Symbols: PYR1, RCAR11 | Polyketide cyclase/dehydrase and lipid transport superfamily protein | chr4:9928792-9929367 FORWARD LENGTH=191	AT4G17870.1 | Symbols: PYR1, RCAR11 | Polyketide cyclase/dehydrase and lipid transport superfamily protein | chr4:9928792-9929367 FORWARD LENGTH=191	LOC_Os10g42280.1 protein|cyclase/dehydrase family protein, putative, expressed	LOC_Os10g42280.1 protein|cyclase/dehydrase family protein, putative, expressed	LOC_Os10g42280.1 protein|cyclase/dehydrase family protein, putative, expressed
Homoeologous triplet 201	TRIAE_CS42_1AL_TGACv1_000465_AA0012660	TRIAE_CS42_1BL_TGACv1_030469_AA0091820	TRIAE_CS42_1DL_TGACv1_063314_AA0226200	ABD	9	9	9	0.934694	0.904572	0.923047	59	30	34	47	31	8	AT4G35160.1 | Symbols: | O-methyltransferase family protein | chr4:16730989-16732808 REVERSE LENGTH=382	AT4G35160.1 | Symbols: | O-methyltransferase family protein | chr4:16730989-16732808 REVERSE LENGTH=382	AT4G35160.1 | Symbols: | O-methyltransferase family protein | chr4:16730989-16732808 REVERSE LENGTH=382	LOC_Os05g43940.1 protein|O-methyltransferase, putative, expressed	LOC_Os05g43930.1 protein|O-methyltransferase, putative, expressed	LOC_Os05g43940.1 protein|O-methyltransferase, putative, expressed
Homoeologous triplet 202	TRIAE_CS42_1AL_TGACv1_000465_AA0012720	TRIAE_CS42_1BL_TGACv1_030469_AA0091810	TRIAE_CS42_1DL_TGACv1_062784_AA0219900	AD-B	2	5	2	0.228345	0.543914	0.149653	263	162	286	194	192	264	AT4G35160.1 | Symbols: | O-methyltransferase family protein | chr4:16730989-16732808 REVERSE LENGTH=382	AT4G35160.1 | Symbols: | O-methyltransferase family protein | chr4:16730989-16732808 REVERSE LENGTH=382	AT4G35160.1 | Symbols: | O-methyltransferase family protein | chr4:16730989-16732808 REVERSE LENGTH=382	LOC_Os05g43940.1 protein|O-methyltransferase, putative, expressed	LOC_Os05g43940.1 protein|O-methyltransferase, putative, expressed	LOC_Os05g43940.1 protein|O-methyltransferase, putative, expressed
Homoeologous triplet 203	TRIAE_CS42_1AL_TGACv1_000465_AA0012670	TRIAE_CS42_1BL_TGACv1_030469_AA0091830	TRIAE_CS42_1DL_TGACv1_063010_AA0222930	ABD	9	9	9	0.986772	0.949801	0.959025	36	35	33	0	1	0	AT4G35160.1 | Symbols: | O-methyltransferase family protein | chr4:16730989-16732808 REVERSE LENGTH=382	AT4G35160.1 | Symbols: | O-methyltransferase family protein | chr4:16730989-16732808 REVERSE LENGTH=382	AT4G35160.1 | Symbols: | O-methyltransferase family protein | chr4:16730989-16732808 REVERSE LENGTH=382	LOC_Os05g43930.1 protein|O-methyltransferase, putative, expressed	LOC_Os05g43940.1 protein|O-methyltransferase, putative, expressed	LOC_Os05g43930.1 protein|O-methyltransferase, putative, expressed
Homoeologous triplet 204	TRIAE_CS42_1AL_TGACv1_000466_AA0012780	TRIAE_CS42_1BL_TGACv1_031981_AA0123730	TRIAE_CS42_1DL_TGACv1_062733_AA0218910	ABD	7	7	7	0.971797	0.971757	0.963151	328	511	405	78	29	68	AT4G20130.1 | Symbols: PTAC14 | plastid transcriptionally active 14 | chr4:10878914-10881697 FORWARD LENGTH=483	AT4G20130.1 | Symbols: PTAC14 | plastid transcriptionally active 14 | chr4:10878914-10881697 FORWARD LENGTH=483	AT4G20130.1 | Symbols: PTAC14 | plastid transcriptionally active 14 | chr4:10878914-10881697 FORWARD LENGTH=483	LOC_Os05g50980.1 protein|SET domain containing protein, expressed	LOC_Os05g50980.1 protein|SET domain containing protein, expressed	LOC_Os05g50980.1 protein|SET domain containing protein, expressed
Homoeologous triplet 205	TRIAE_CS42_1AL_TGACv1_000466_AA0012770	TRIAE_CS42_1BL_TGACv1_033032_AA0136290	TRIAE_CS42_1DL_TGACv1_062733_AA0218900	ABD	1	1	1	0.90563	0.781669	0.631807	573	613	450	4	87	101	AT3G12670.1 | Symbols: emb2742 | CTP synthase family protein | chr3:4020351-4024086 REVERSE LENGTH=591	AT1G30820.1 | Symbols: | CTP synthase family protein | chr1:10945251-10948825 REVERSE LENGTH=600	AT3G12670.1 | Symbols: emb2742 | CTP synthase family protein | chr3:4020351-4024086 REVERSE LENGTH=591	LOC_Os01g43020.1 protein|CTP synthase, putative, expressed	LOC_Os01g43020.1 protein|CTP synthase, putative, expressed	LOC_Os01g43020.1 protein|CTP synthase, putative, expressed
Homoeologous triplet 206	TRIAE_CS42_1AL_TGACv1_000466_AA0012750	TRIAE_CS42_1BL_TGACv1_033032_AA0136330	TRIAE_CS42_1DL_TGACv1_061675_AA0201430	ABD	2	2	2	0.909428	0.911514	0.873947	469	250	362	132	33	8	AT4G01030.1 | Symbols: | pentatricopeptide (PPR) repeat-containing protein | chr4:448336-450642 REVERSE LENGTH=768	AT4G01030.1 | Symbols: | pentatricopeptide (PPR) repeat-containing protein | chr4:448336-450642 REVERSE LENGTH=768	AT4G01030.1 | Symbols: | pentatricopeptide (PPR) repeat-containing protein | chr4:448336-450642 REVERSE LENGTH=768	LOC_Os05g50950.1 protein|pentatricopeptide repeat protein PPR986-12, putative, expressed	LOC_Os05g50950.1 protein|pentatricopeptide repeat protein PPR986-12, putative, expressed	LOC_Os05g50950.1 protein|pentatricopeptide repeat protein PPR986-12, putative, expressed
Homoeologous triplet 207	TRIAE_CS42_1AL_TGACv1_000466_AA0012740	TRIAE_CS42_1BL_TGACv1_035047_AA0146070	TRIAE_CS42_1DL_TGACv1_061675_AA0201440	ABD	11	11	11	0.870481	0.940218	0.902078	109	66	104	55	18	43	AT5G24130.1 | Symbols: | unknown protein; FUNCTIONS IN: molecular_function unknown; INVOLVED IN: biological_process unknown; LOCATED IN: mitochondrion; EXPRESSED IN: petal, leaf whorl, flower; EXPRESSED DURING: 4 anthesis, petal differentiation and expansion stage; Has 1807 Blast hits to 1807 proteins in 277 species: Archae - 0; Bacteria - 0; Metazoa - 736; Fungi - 347; Plants - 385; Viruses - 0;…	AT5G24130.1 | Symbols: | unknown protein; FUNCTIONS IN: molecular_function unknown; INVOLVED IN: biological_process unknown; LOCATED IN: mitochondrion; EXPRESSED IN: petal, leaf whorl, flower; EXPRESSED DURING: 4 anthesis, petal differentiation and expansion stage; Has 1807 Blast hits to 1807 proteins in 277 species: Archae - 0; Bacteria - 0; Metazoa - 736; Fungi - 347; Plants - 385; Viruses - 0;…	AT5G24130.1 | Symbols: | unknown protein; FUNCTIONS IN: molecular_function unknown; INVOLVED IN: biological_process unknown; LOCATED IN: mitochondrion; EXPRESSED IN: petal, leaf whorl, flower; EXPRESSED DURING: 4 anthesis, petal differentiation and expansion stage; Has 1807 Blast hits to 1807 proteins in 277 species: Archae - 0; Bacteria - 0; Metazoa - 736; Fungi - 347; Plants - 385; Viruses - 0;…	LOC_Os05g50940.1 protein|expressed protein	LOC_Os05g50940.1 protein|expressed protein	LOC_Os05g50940.1 protein|expressed protein
Homoeologous triplet 208	TRIAE_CS42_1AL_TGACv1_000473_AA0012940	TRIAE_CS42_1BL_TGACv1_030377_AA0088510	TRIAE_CS42_1DL_TGACv1_061207_AA0188780	ABD	4	4	4	0.970785	0.975466	0.960258	82	78	67	9	29	4	AT5G26594.1 | Symbols: ARR24, RR24 | response regulator 24 | chr5:9269282-9270254 FORWARD LENGTH=139	AT5G26594.1 | Symbols: ARR24, RR24 | response regulator 24 | chr5:9269282-9270254 FORWARD LENGTH=139	AT5G26594.1 | Symbols: ARR24, RR24 | response regulator 24 | chr5:9269282-9270254 FORWARD LENGTH=139	LOC_Os04g13480.1 protein|response regulator receiver domain containing protein, expressed	LOC_Os04g13480.1 protein|response regulator receiver domain containing protein, expressed	LOC_Os04g13480.1 protein|response regulator receiver domain containing protein, expressed
Homoeologous triplet 209	TRIAE_CS42_1AL_TGACv1_000473_AA0012920	TRIAE_CS42_1BL_TGACv1_030377_AA0088490	TRIAE_CS42_1DL_TGACv1_061207_AA0188800	AB-D	6	6	3	0.810456	0.642571	0.794911	666	720	698	160	159	101	AT4G10960.1 | Symbols: UGE5 | UDP-D-glucose/UDP-D-galactose 4-epimerase 5 | chr4:6716083-6718472 REVERSE LENGTH=351	AT4G10960.1 | Symbols: UGE5 | UDP-D-glucose/UDP-D-galactose 4-epimerase 5 | chr4:6716083-6718472 REVERSE LENGTH=351	AT4G10960.1 | Symbols: UGE5 | UDP-D-glucose/UDP-D-galactose 4-epimerase 5 | chr4:6716083-6718472 REVERSE LENGTH=351	LOC_Os05g51670.2 protein|NAD dependent epimerase/dehydratase family protein, putative, expressed, LOC_Os05g51670.1 protein|NAD dependent epimerase/dehydratase family protein, putative, expressed, LOC_Os05g51670.3 protein|NAD dependent epimerase/dehydratase family protein, putative, expressed	LOC_Os05g51670.2 protein|NAD dependent epimerase/dehydratase family protein, putative, expressed, LOC_Os05g51670.1 protein|NAD dependent epimerase/dehydratase family protein, putative, expressed, LOC_Os05g51670.3 protein|NAD dependent epimerase/dehydratase family protein, putative, expressed	LOC_Os05g51670.2 protein|NAD dependent epimerase/dehydratase family protein, putative, expressed, LOC_Os05g51670.1 protein|NAD dependent epimerase/dehydratase family protein, putative, expressed, LOC_Os05g51670.3 protein|NAD dependent epimerase/dehydratase family protein, putative, expressed
Homoeologous triplet 210	TRIAE_CS42_1AL_TGACv1_000473_AA0012980	TRIAE_CS42_1BL_TGACv1_033193_AA0137730	TRIAE_CS42_1DL_TGACv1_061763_AA0203030	AB-D	6	6	1	0.88584	0.900374	0.848756	627	677	691	3	6	4	AT4G35020.1 | Symbols: ARAC3, ROP6, RHO1PS, ATROP6, RAC3 | RAC-like 3 | chr4:16673176-16674540 FORWARD LENGTH=198, AT4G35020.2 | Symbols: RAC3 | RAC-like 3 | chr4:16673176-16674540 FORWARD LENGTH=198, AT4G35020.3 | Symbols: RAC3 | RAC-like 3 | chr4:16673176-16674540 FORWARD LENGTH=198	AT4G35020.1 | Symbols: ARAC3, ROP6, RHO1PS, ATROP6, RAC3 | RAC-like 3 | chr4:16673176-16674540 FORWARD LENGTH=198, AT4G35020.2 | Symbols: RAC3 | RAC-like 3 | chr4:16673176-16674540 FORWARD LENGTH=198, AT4G35020.3 | Symbols: RAC3 | RAC-like 3 | chr4:16673176-16674540 FORWARD LENGTH=198	AT4G35020.1 | Symbols: ARAC3, ROP6, RHO1PS, ATROP6, RAC3 | RAC-like 3 | chr4:16673176-16674540 FORWARD LENGTH=198, AT4G35020.2 | Symbols: RAC3 | RAC-like 3 | chr4:16673176-16674540 FORWARD LENGTH=198, AT4G35020.3 | Symbols: RAC3 | RAC-like 3 | chr4:16673176-16674540 FORWARD LENGTH=198	LOC_Os02g58730.1 protein|ras-related protein, putative, expressed, LOC_Os02g58730.2 protein|ras-related protein, putative, expressed	LOC_Os02g58730.1 protein|ras-related protein, putative, expressed, LOC_Os02g58730.2 protein|ras-related protein, putative, expressed	LOC_Os02g58730.1 protein|ras-related protein, putative, expressed, LOC_Os02g58730.2 protein|ras-related protein, putative, expressed
Homoeologous triplet 211	TRIAE_CS42_1AL_TGACv1_000473_AA0012970	TRIAE_CS42_1BL_TGACv1_033193_AA0137720	TRIAE_CS42_1DL_TGACv1_061763_AA0203020	ABD	1	1	1	0.789784	0.735448	0.811488	15	13	14	0	6	4	AT1G02180.1 | Symbols: | ferredoxin-related | chr1:413619-414505 REVERSE LENGTH=226	AT1G02180.1 | Symbols: | ferredoxin-related | chr1:413619-414505 REVERSE LENGTH=226	AT1G02180.1 | Symbols: | ferredoxin-related | chr1:413619-414505 REVERSE LENGTH=226	LOC_Os02g58740.1 protein|expressed protein	LOC_Os02g58740.1 protein|expressed protein	LOC_Os02g58740.1 protein|expressed protein
Homoeologous triplet 212	TRIAE_CS42_1AL_TGACv1_000475_AA0013000	TRIAE_CS42_1BL_TGACv1_032087_AA0125230	TRIAE_CS42_1DL_TGACv1_061531_AA0197960	AB-D	17	17	1	0.762701	0.943514	0.888986	324	357	371	28	11	19	AT3G61750.1 | Symbols: | Cytochrome b561/ferric reductase transmembrane with DOMON related domain | chr3:22857897-22859254 REVERSE LENGTH=398	AT3G61750.1 | Symbols: | Cytochrome b561/ferric reductase transmembrane with DOMON related domain | chr3:22857897-22859254 REVERSE LENGTH=398	AT3G61750.1 | Symbols: | Cytochrome b561/ferric reductase transmembrane with DOMON related domain | chr3:22857897-22859254 REVERSE LENGTH=398	LOC_Os05g48270.1 protein|auxin-responsive protein, putative, expressed	LOC_Os05g48270.1 protein|auxin-responsive protein, putative, expressed	LOC_Os05g48270.1 protein|auxin-responsive protein, putative, expressed
Homoeologous triplet 213	TRIAE_CS42_1AL_TGACv1_000476_AA0013090	TRIAE_CS42_1BL_TGACv1_031227_AA0109950	TRIAE_CS42_1DL_TGACv1_063745_AA0230460	ABD	1	1	1	0.715913	0.820308	0.830872	11	39	17	14	2	1	AT3G04610.1 | Symbols: FLK | RNA-binding KH domain-containing protein | chr3:1250762-1254272 REVERSE LENGTH=577	AT3G04610.1 | Symbols: FLK | RNA-binding KH domain-containing protein | chr3:1250762-1254272 REVERSE LENGTH=577	AT3G04610.1 | Symbols: FLK | RNA-binding KH domain-containing protein | chr3:1250762-1254272 REVERSE LENGTH=577	LOC_Os10g27470.1 protein|KH domain containing protein, putative, expressed	LOC_Os10g27470.1 protein|KH domain containing protein, putative, expressed	LOC_Os10g27470.1 protein|KH domain containing protein, putative, expressed
Homoeologous triplet 214	TRIAE_CS42_1AL_TGACv1_000481_AA0013140	TRIAE_CS42_1BL_TGACv1_030697_AA0098150	TRIAE_CS42_1DL_TGACv1_061899_AA0205400	ABD	1	1	1	0.781718	0.850429	0.82161	671	724	717	7	4	0	No hits found	No hits found	No hits found	LOC_Os05g30860.1 protein|expressed protein	LOC_Os05g30860.1 protein|expressed protein	LOC_Os05g30860.1 protein|expressed protein
Homoeologous triplet 215	TRIAE_CS42_1AL_TGACv1_000482_AA0013200	TRIAE_CS42_1BL_TGACv1_031763_AA0120240	TRIAE_CS42_1DL_TGACv1_062249_AA0211290	A-B-D	2	5	1	0.810867	0.758879	0.903774	599	630	648	41	138	9	AT5G28840.1 | Symbols: GME | GDP-D-mannose 3',5'-epimerase | chr5:10862472-10864024 REVERSE LENGTH=377, AT5G28840.2 | Symbols: GME | GDP-D-mannose 3',5'-epimerase | chr5:10862472-10864024 REVERSE LENGTH=377	AT5G28840.1 | Symbols: GME | GDP-D-mannose 3',5'-epimerase | chr5:10862472-10864024 REVERSE LENGTH=377, AT5G28840.2 | Symbols: GME | GDP-D-mannose 3',5'-epimerase | chr5:10862472-10864024 REVERSE LENGTH=377	AT5G28840.1 | Symbols: GME | GDP-D-mannose 3',5'-epimerase | chr5:10862472-10864024 REVERSE LENGTH=377, AT5G28840.2 | Symbols: GME | GDP-D-mannose 3',5'-epimerase | chr5:10862472-10864024 REVERSE LENGTH=377	LOC_Os10g28200.2 protein|NAD dependent epimerase/dehydratase family protein, putative, expressed, LOC_Os10g28200.1 protein|NAD dependent epimerase/dehydratase family protein, putative, expressed	LOC_Os10g28200.2 protein|NAD dependent epimerase/dehydratase family protein, putative, expressed, LOC_Os10g28200.1 protein|NAD dependent epimerase/dehydratase family protein, putative, expressed	LOC_Os10g28200.2 protein|NAD dependent epimerase/dehydratase family protein, putative, expressed, LOC_Os10g28200.1 protein|NAD dependent epimerase/dehydratase family protein, putative, expressed
Homoeologous triplet 216	TRIAE_CS42_1AL_TGACv1_000489_AA0013310	TRIAE_CS42_1BL_TGACv1_030994_AA0105330	TRIAE_CS42_1DL_TGACv1_061970_AA0206640	ABD	1	1	1	0.859825	0.892265	0.828212	357	510	194	22	6	101	AT4G35490.1 | Symbols: MRPL11 | mitochondrial ribosomal protein L11 | chr4:16855918-16856385 FORWARD LENGTH=155	AT4G35490.1 | Symbols: MRPL11 | mitochondrial ribosomal protein L11 | chr4:16855918-16856385 FORWARD LENGTH=155	AT4G35490.1 | Symbols: MRPL11 | mitochondrial ribosomal protein L11 | chr4:16855918-16856385 FORWARD LENGTH=155	LOC_Os10g32870.1 protein|L11 domain containing ribosomal protein, putative, expressed	LOC_Os10g32870.1 protein|L11 domain containing ribosomal protein, putative, expressed	LOC_Os10g32870.1 protein|L11 domain containing ribosomal protein, putative, expressed
Homoeologous triplet 217	TRIAE_CS42_1AL_TGACv1_000490_AA0013360	TRIAE_CS42_1BL_TGACv1_031247_AA0110330	TRIAE_CS42_1DL_TGACv1_061550_AA0198540	BD-A	3	5	5	0.669919	0.710885	0.672545	419	226	446	357	237	370	No hits found	No hits found	No hits found	LOC_Os01g04040.1 protein|BBTI11 - Bowman-Birk type bran trypsin inhibitor precursor, putative, expressed	LOC_Os01g04040.1 protein|BBTI11 - Bowman-Birk type bran trypsin inhibitor precursor, putative, expressed	LOC_Os01g04040.1 protein|BBTI11 - Bowman-Birk type bran trypsin inhibitor precursor, putative, expressed
Homoeologous triplet 218	TRIAE_CS42_1AL_TGACv1_000492_AA0013410	TRIAE_CS42_1BL_TGACv1_030377_AA0088540	TRIAE_CS42_1DL_TGACv1_061176_AA0187850	AD-B	7	1	7	0.480244	0.755034	0.447196	587	726	656	370	283	283	AT4G23900.1 | Symbols: | Nucleoside diphosphate kinase family protein | chr4:12424505-12426318 FORWARD LENGTH=237	AT4G11010.1 | Symbols: NDPK3 | nucleoside diphosphate kinase 3 | chr4:6732780-6734298 REVERSE LENGTH=238	AT4G23900.1 | Symbols: | Nucleoside diphosphate kinase family protein | chr4:12424505-12426318 FORWARD LENGTH=237	LOC_Os05g51700.3 protein|nucleoside diphosphate kinase, putative, expressed, LOC_Os05g51700.1 protein|nucleoside diphosphate kinase, putative, expressed, LOC_Os05g51700.2 protein|nucleoside diphosphate kinase, putative, expressed	LOC_Os05g51700.3 protein|nucleoside diphosphate kinase, putative, expressed, LOC_Os05g51700.1 protein|nucleoside diphosphate kinase, putative, expressed, LOC_Os05g51700.2 protein|nucleoside diphosphate kinase, putative, expressed	LOC_Os05g51700.3 protein|nucleoside diphosphate kinase, putative, expressed, LOC_Os05g51700.1 protein|nucleoside diphosphate kinase, putative, expressed, LOC_Os05g51700.2 protein|nucleoside diphosphate kinase, putative, expressed
Homoeologous triplet 219	TRIAE_CS42_1AL_TGACv1_000496_AA0013490	TRIAE_CS42_1BL_TGACv1_032964_AA0135810	TRIAE_CS42_1DL_TGACv1_061605_AA0199820	ABD	1	1	1	0.906103	0.959555	0.878568	311	300	237	71	70	104	AT3G17380.1 | Symbols: | TRAF-like family protein | chr3:5950240-5952124 FORWARD LENGTH=309	AT3G17380.1 | Symbols: | TRAF-like family protein | chr3:5950240-5952124 FORWARD LENGTH=309	AT3G17380.1 | Symbols: | TRAF-like family protein | chr3:5950240-5952124 FORWARD LENGTH=309	LOC_Os10g33830.1 protein|MATH domain containing protein, expressed	LOC_Os10g33830.1 protein|MATH domain containing protein, expressed	LOC_Os10g33830.1 protein|MATH domain containing protein, expressed
Homoeologous triplet 220	TRIAE_CS42_1AL_TGACv1_000501_AA0013500	TRIAE_CS42_1BL_TGACv1_031553_AA0115960	TRIAE_CS42_1DL_TGACv1_064270_AA0233670	BD-A	1	13	13	0.327592	0.513456	0.91309	727	727	727	35	23	4	AT1G54290.1 | Symbols: | Translation initiation factor SUI1 family protein | chr1:20268710-20269390 REVERSE LENGTH=113	AT1G54290.1 | Symbols: | Translation initiation factor SUI1 family protein | chr1:20268710-20269390 REVERSE LENGTH=113	AT1G54290.1 | Symbols: | Translation initiation factor SUI1 family protein | chr1:20268710-20269390 REVERSE LENGTH=113	LOC_Os05g41900.3 protein|translation initiation factor SUI1, putative, expressed, LOC_Os05g41900.4 protein|translation initiation factor SUI1, putative, expressed, LOC_Os05g41900.1 protein|translation initiation factor SUI1, putative, expressed, LOC_Os05g41900.2 protein|translation initiation factor SUI1, putative, expressed	LOC_Os05g41900.3 protein|translation initiation factor SUI1, putative, expressed, LOC_Os05g41900.4 protein|translation initiation factor SUI1, putative, expressed, LOC_Os05g41900.1 protein|translation initiation factor SUI1, putative, expressed, LOC_Os05g41900.2 protein|translation initiation factor SUI1, putative, expressed	LOC_Os05g41900.3 protein|translation initiation factor SUI1, putative, expressed, LOC_Os05g41900.4 protein|translation initiation factor SUI1, putative, expressed, LOC_Os05g41900.1 protein|translation initiation factor SUI1, putative, expressed, LOC_Os05g41900.2 protein|translation initiation factor SUI1, putative, expressed
Homoeologous triplet 221	TRIAE_CS42_1AL_TGACv1_000503_AA0013530	TRIAE_CS42_1BL_TGACv1_033296_AA0138580	TRIAE_CS42_1DL_TGACv1_062206_AA0210470	A-B-D	1	21	4	0.880414	0.964353	0.916703	106	132	115	15	1	7	AT5G54510.1 | Symbols: GH3.6, DFL1 | Auxin-responsive GH3 family protein | chr5:22131321-22133564 REVERSE LENGTH=612	AT5G54510.1 | Symbols: GH3.6, DFL1 | Auxin-responsive GH3 family protein | chr5:22131321-22133564 REVERSE LENGTH=612	AT5G54510.1 | Symbols: GH3.6, DFL1 | Auxin-responsive GH3 family protein | chr5:22131321-22133564 REVERSE LENGTH=612	LOC_Os05g42150.1 protein|OsGH3.4 - Probable indole-3-acetic acid-amido synthetase, expressed	LOC_Os05g42150.1 protein|OsGH3.4 - Probable indole-3-acetic acid-amido synthetase, expressed	LOC_Os05g42150.1 protein|OsGH3.4 - Probable indole-3-acetic acid-amido synthetase, expressed
Homoeologous triplet 222	TRIAE_CS42_1AL_TGACv1_000504_AA0013540	TRIAE_CS42_1BL_TGACv1_031006_AA0105630	TRIAE_CS42_1DL_TGACv1_061281_AA0191170	AD-B	3	9	3	0.818646	0.894721	0.749333	95	66	74	8	10	13	AT2G17030.1 | Symbols: | F-box family protein with a domain of unknown function (DUF295) | chr2:7399108-7400650 FORWARD LENGTH=407	AT2G17030.1 | Symbols: | F-box family protein with a domain of unknown function (DUF295) | chr2:7399108-7400650 FORWARD LENGTH=407	No hits found	LOC_Os10g37570.1 protein|OsFBDUF49 - F-box and DUF domain containing protein, expressed	LOC_Os10g37570.1 protein|OsFBDUF49 - F-box and DUF domain containing protein, expressed	LOC_Os10g37570.1 protein|OsFBDUF49 - F-box and DUF domain containing protein, expressed
Homoeologous triplet 223	TRIAE_CS42_1AL_TGACv1_000505_AA0013560	TRIAE_CS42_1BL_TGACv1_031792_AA0120630	TRIAE_CS42_1DL_TGACv1_063702_AA0230060	ABD	3	3	3	0.917925	0.944333	0.961807	486	394	454	20	14	8	AT2G46620.1 | Symbols: | P-loop containing nucleoside triphosphate hydrolases superfamily protein | chr2:19139071-19140546 REVERSE LENGTH=491	AT2G46620.1 | Symbols: | P-loop containing nucleoside triphosphate hydrolases superfamily protein | chr2:19139071-19140546 REVERSE LENGTH=491	AT2G46620.1 | Symbols: | P-loop containing nucleoside triphosphate hydrolases superfamily protein | chr2:19139071-19140546 REVERSE LENGTH=491	LOC_Os10g37500.1 protein|AAA-type ATPase family protein, putative, expressed	LOC_Os10g37500.1 protein|AAA-type ATPase family protein, putative, expressed	LOC_Os10g37500.1 protein|AAA-type ATPase family protein, putative, expressed
Homoeologous triplet 224	TRIAE_CS42_1AL_TGACv1_000508_AA0013570	TRIAE_CS42_1BL_TGACv1_030622_AA0096070	TRIAE_CS42_1DL_TGACv1_061091_AA0184710	ABD	1	1	1	0.788528	0.885253	0.739079	711	712	708	1	3	25	AT2G28430.1 | Symbols: | unknown protein; Has 28 Blast hits to 28 proteins in 12 species: Archae - 0; Bacteria - 0; Metazoa - 0; Fungi - 0; Plants - 28; Viruses - 0; Other Eukaryotes - 0 (source: NCBI BLink). | chr2:12159736-12160387 REVERSE LENGTH=85	AT2G28430.1 | Symbols: | unknown protein; Has 28 Blast hits to 28 proteins in 12 species: Archae - 0; Bacteria - 0; Metazoa - 0; Fungi - 0; Plants - 28; Viruses - 0; Other Eukaryotes - 0 (source: NCBI BLink). | chr2:12159736-12160387 REVERSE LENGTH=85	AT2G28430.1 | Symbols: | unknown protein; Has 28 Blast hits to 28 proteins in 12 species: Archae - 0; Bacteria - 0; Metazoa - 0; Fungi - 0; Plants - 28; Viruses - 0; Other Eukaryotes - 0 (source: NCBI BLink). | chr2:12159736-12160387 REVERSE LENGTH=85	LOC_Os10g34030.1 protein|zinc finger, C3HC4 type domain containing protein, expressed	LOC_Os10g34030.1 protein|zinc finger, C3HC4 type domain containing protein, expressed	LOC_Os10g34030.1 protein|zinc finger, C3HC4 type domain containing protein, expressed
Homoeologous triplet 225	TRIAE_CS42_1AL_TGACv1_000509_AA0013590	TRIAE_CS42_1BL_TGACv1_031153_AA0108790	TRIAE_CS42_1DL_TGACv1_064248_AA0233500	ABD	9	9	9	0.455925	0.393583	0.552423	38	59	12	80	35	54	AT2G20340.1 | Symbols: | Pyridoxal phosphate (PLP)-dependent transferases superfamily protein | chr2:8779804-8782490 FORWARD LENGTH=490	AT2G20340.1 | Symbols: | Pyridoxal phosphate (PLP)-dependent transferases superfamily protein | chr2:8779804-8782490 FORWARD LENGTH=490	AT2G20340.1 | Symbols: | Pyridoxal phosphate (PLP)-dependent transferases superfamily protein | chr2:8779804-8782490 FORWARD LENGTH=490	LOC_Os05g43510.1 protein|decarboxylase, putative, expressed	LOC_Os05g43510.1 protein|decarboxylase, putative, expressed	LOC_Os05g43510.1 protein|decarboxylase, putative, expressed
Homoeologous triplet 226	TRIAE_CS42_1AL_TGACv1_000516_AA0013740	TRIAE_CS42_1BL_TGACv1_030870_AA0102720	TRIAE_CS42_1DL_TGACv1_062065_AA0208240	ABD	1	1	1	0.722185	0.752208	0.719375	301	259	88	63	187	61	AT5G05490.1 | Symbols: SYN1, ATREC8, REC8 | Rad21/Rec8-like family protein | chr5:1624325-1629144 FORWARD LENGTH=627, AT5G05490.2 | Symbols: SYN1, DIF1 | Rad21/Rec8-like family protein | chr5:1624712-1629144 FORWARD LENGTH=617	AT5G05490.1 | Symbols: SYN1, ATREC8, REC8 | Rad21/Rec8-like family protein | chr5:1624325-1629144 FORWARD LENGTH=627, AT5G05490.2 | Symbols: SYN1, DIF1 | Rad21/Rec8-like family protein | chr5:1624712-1629144 FORWARD LENGTH=617	AT5G05490.1 | Symbols: SYN1, ATREC8, REC8 | Rad21/Rec8-like family protein | chr5:1624325-1629144 FORWARD LENGTH=627, AT5G05490.2 | Symbols: SYN1, DIF1 | Rad21/Rec8-like family protein | chr5:1624712-1629144 FORWARD LENGTH=617	LOC_Os05g50410.1 protein|Rad21 / Rec8 like protein, putative, expressed, LOC_Os05g50410.2 protein|Rad21 / Rec8 like protein, putative, expressed	LOC_Os05g50410.1 protein|Rad21 / Rec8 like protein, putative, expressed, LOC_Os05g50410.2 protein|Rad21 / Rec8 like protein, putative, expressed	LOC_Os05g50410.1 protein|Rad21 / Rec8 like protein, putative, expressed, LOC_Os05g50410.2 protein|Rad21 / Rec8 like protein, putative, expressed
Homoeologous triplet 227	TRIAE_CS42_1AL_TGACv1_000524_AA0013890	TRIAE_CS42_1BL_TGACv1_033571_AA0140410	TRIAE_CS42_1DL_TGACv1_061574_AA0198890	ABD	1	1	1	0.562675	0.561114	0.788378	504	156	149	266	236	5	AT1G07210.1 | Symbols: | Ribosomal protein S18 | chr1:2215320-2216668 FORWARD LENGTH=261	AT1G07210.1 | Symbols: | Ribosomal protein S18 | chr1:2215320-2216668 FORWARD LENGTH=261	AT1G07210.1 | Symbols: | Ribosomal protein S18 | chr1:2215320-2216668 FORWARD LENGTH=261	LOC_Os10g35690.1 protein|ribosomal protein S18 containing protein, expressed	LOC_Os10g35690.1 protein|ribosomal protein S18 containing protein, expressed	LOC_Os10g35690.1 protein|ribosomal protein S18 containing protein, expressed
Homoeologous triplet 228	TRIAE_CS42_1AL_TGACv1_000533_AA0014130	TRIAE_CS42_1BL_TGACv1_031004_AA0105520	TRIAE_CS42_1DL_TGACv1_061770_AA0203160	ABD	1	1	1	0.930816	0.913566	0.957654	727	727	727	0	0	0	AT1G04300.1 | Symbols: | TRAF-like superfamily protein | chr1:1148818-1153895 REVERSE LENGTH=1074, AT1G04300.2 | Symbols: | TRAF-like superfamily protein | chr1:1148818-1153095 REVERSE LENGTH=997, AT1G04300.3 | Symbols: | TRAF-like superfamily protein | chr1:1148818-1153895 REVERSE LENGTH=1082, AT1G04300.4 | Symbols: | TRAF-like superfamily protein | chr1:1148818-1153895 REVERSE LENGTH=1055	AT1G04300.1 | Symbols: | TRAF-like superfamily protein | chr1:1148818-1153895 REVERSE LENGTH=1074, AT1G04300.2 | Symbols: | TRAF-like superfamily protein | chr1:1148818-1153095 REVERSE LENGTH=997, AT1G04300.3 | Symbols: | TRAF-like superfamily protein | chr1:1148818-1153895 REVERSE LENGTH=1082, AT1G04300.4 | Symbols: | TRAF-like superfamily protein | chr1:1148818-1153895 REVERSE LENGTH=1055	AT1G04300.1 | Symbols: | TRAF-like superfamily protein | chr1:1148818-1153895 REVERSE LENGTH=1074, AT1G04300.2 | Symbols: | TRAF-like superfamily protein | chr1:1148818-1153095 REVERSE LENGTH=997, AT1G04300.3 | Symbols: | TRAF-like superfamily protein | chr1:1148818-1153895 REVERSE LENGTH=1082, AT1G04300.4 | Symbols: | TRAF-like superfamily protein | chr1:1148818-1153895 REVERSE LENGTH=1055	LOC_Os05g43280.1 protein|MATH domain containing protein, expressed	LOC_Os05g43280.1 protein|MATH domain containing protein, expressed	LOC_Os05g43280.1 protein|MATH domain containing protein, expressed
Homoeologous triplet 229	TRIAE_CS42_1AL_TGACv1_000533_AA0014140	TRIAE_CS42_1BL_TGACv1_031004_AA0105530	TRIAE_CS42_1DL_TGACv1_061770_AA0203180	A-B-D	1	3	6	0.698969	0.711608	0.586567	133	318	258	157	82	69	AT1G06750.1 | Symbols: | P-loop containing nucleoside triphosphate hydrolases superfamily protein | chr1:2073882-2076350 FORWARD LENGTH=519, AT1G06750.2 | Symbols: | P-loop containing nucleoside triphosphate hydrolases superfamily protein | chr1:2073882-2076350 FORWARD LENGTH=526	AT1G06750.1 | Symbols: | P-loop containing nucleoside triphosphate hydrolases superfamily protein | chr1:2073882-2076350 FORWARD LENGTH=519, AT1G06750.2 | Symbols: | P-loop containing nucleoside triphosphate hydrolases superfamily protein | chr1:2073882-2076350 FORWARD LENGTH=526	AT1G06750.1 | Symbols: | P-loop containing nucleoside triphosphate hydrolases superfamily protein | chr1:2073882-2076350 FORWARD LENGTH=519, AT1G06750.2 | Symbols: | P-loop containing nucleoside triphosphate hydrolases superfamily protein | chr1:2073882-2076350 FORWARD LENGTH=526	LOC_Os05g43300.3 protein|expressed protein, LOC_Os05g43300.1 protein|expressed protein, LOC_Os05g43300.2 protein|expressed protein	LOC_Os05g43300.3 protein|expressed protein, LOC_Os05g43300.1 protein|expressed protein, LOC_Os05g43300.2 protein|expressed protein	LOC_Os05g43300.3 protein|expressed protein, LOC_Os05g43300.1 protein|expressed protein, LOC_Os05g43300.2 protein|expressed protein
Homoeologous triplet 230	TRIAE_CS42_1AL_TGACv1_000540_AA0014300	TRIAE_CS42_1BL_TGACv1_032502_AA0130600	TRIAE_CS42_1DL_TGACv1_061982_AA0206800	AD-B	7	2	7	0.787242	0.948793	0.660643	692	612	685	200	13	272	AT1G49970.1 | Symbols: CLPR1, NCLPP5, SVR2 | CLP protease proteolytic subunit 1 | chr1:18501936-18504462 REVERSE LENGTH=387	AT1G49970.1 | Symbols: CLPR1, NCLPP5, SVR2 | CLP protease proteolytic subunit 1 | chr1:18501936-18504462 REVERSE LENGTH=387	AT1G49970.1 | Symbols: CLPR1, NCLPP5, SVR2 | CLP protease proteolytic subunit 1 | chr1:18501936-18504462 REVERSE LENGTH=387	LOC_Os05g51450.1 protein|OsClp8 - Putative Clp protease homologue, expressed	LOC_Os05g51450.1 protein|OsClp8 - Putative Clp protease homologue, expressed	LOC_Os05g51450.1 protein|OsClp8 - Putative Clp protease homologue, expressed
Homoeologous triplet 231	TRIAE_CS42_1AL_TGACv1_000540_AA0014290	TRIAE_CS42_1BL_TGACv1_032502_AA0130590	TRIAE_CS42_1DL_TGACv1_061982_AA0206790	ABD	1	1	1	0.854362	0.769233	0.574891	641	686	656	17	10	86	AT1G21200.1 | Symbols: | sequence-specific DNA binding transcription factors | chr1:7421483-7422814 FORWARD LENGTH=443	AT1G21200.1 | Symbols: | sequence-specific DNA binding transcription factors | chr1:7421483-7422814 FORWARD LENGTH=443	AT1G21200.1 | Symbols: | sequence-specific DNA binding transcription factors | chr1:7421483-7422814 FORWARD LENGTH=443	LOC_Os11g06410.3 protein|homeodomain, putative, expressed, LOC_Os11g06410.1 protein|homeodomain, putative, expressed, LOC_Os11g06410.2 protein|homeodomain, putative, expressed	LOC_Os11g06410.3 protein|homeodomain, putative, expressed, LOC_Os11g06410.1 protein|homeodomain, putative, expressed, LOC_Os11g06410.2 protein|homeodomain, putative, expressed	LOC_Os11g06410.3 protein|homeodomain, putative, expressed, LOC_Os11g06410.1 protein|homeodomain, putative, expressed, LOC_Os11g06410.2 protein|homeodomain, putative, expressed
Homoeologous triplet 232	TRIAE_CS42_1AL_TGACv1_000546_AA0014380	TRIAE_CS42_1BL_TGACv1_031480_AA0114860	TRIAE_CS42_1DL_TGACv1_061094_AA0184820	ABD	1	1	1	0.872446	0.868255	0.841949	369	354	322	0	1	0	AT2G47480.1 | Symbols: | Protein of unknown function (DUF3511) | chr2:19484207-19484539 REVERSE LENGTH=110	AT2G47480.1 | Symbols: | Protein of unknown function (DUF3511) | chr2:19484207-19484539 REVERSE LENGTH=110	AT2G47480.1 | Symbols: | Protein of unknown function (DUF3511) | chr2:19484207-19484539 REVERSE LENGTH=110	LOC_Os05g28840.1 protein|expressed protein	LOC_Os05g28840.1 protein|expressed protein	LOC_Os05g28840.1 protein|expressed protein
Homoeologous triplet 233	TRIAE_CS42_1AL_TGACv1_000546_AA0014390	TRIAE_CS42_1BL_TGACv1_031480_AA0114870	TRIAE_CS42_1DL_TGACv1_061094_AA0184830	ABD	17	17	17	0.902707	0.920327	0.902646	75	56	106	9	1	14	AT2G40320.1 | Symbols: TBL33 | TRICHOME BIREFRINGENCE-LIKE 33 | chr2:16840330-16842139 FORWARD LENGTH=425	AT2G40320.1 | Symbols: TBL33 | TRICHOME BIREFRINGENCE-LIKE 33 | chr2:16840330-16842139 FORWARD LENGTH=425	AT2G40320.1 | Symbols: TBL33 | TRICHOME BIREFRINGENCE-LIKE 33 | chr2:16840330-16842139 FORWARD LENGTH=425	LOC_Os05g28830.1 protein|PMR5, putative, expressed	LOC_Os05g28830.1 protein|PMR5, putative, expressed	LOC_Os05g28830.1 protein|PMR5, putative, expressed
Homoeologous triplet 234	TRIAE_CS42_1AL_TGACv1_000548_AA0014450	TRIAE_CS42_1BL_TGACv1_031105_AA0107850	TRIAE_CS42_1DL_TGACv1_062977_AA0222480	ABD	1	1	1	0.767704	0.803251	0.795639	722	615	718	44	0	35	AT3G27700.1 | Symbols: | zinc finger (CCCH-type) family protein / RNA recognition motif (RRM)-containing protein | chr3:10257681-10261330 REVERSE LENGTH=908, AT3G27700.2 | Symbols: | zinc finger (CCCH-type) family protein / RNA recognition motif (RRM)-containing protein | chr3:10257681-10261330 REVERSE LENGTH=908	AT3G27700.1 | Symbols: | zinc finger (CCCH-type) family protein / RNA recognition motif (RRM)-containing protein | chr3:10257681-10261330 REVERSE LENGTH=908, AT3G27700.2 | Symbols: | zinc finger (CCCH-type) family protein / RNA recognition motif (RRM)-containing protein | chr3:10257681-10261330 REVERSE LENGTH=908	AT3G27700.1 | Symbols: | zinc finger (CCCH-type) family protein / RNA recognition motif (RRM)-containing protein | chr3:10257681-10261330 REVERSE LENGTH=908, AT3G27700.2 | Symbols: | zinc finger (CCCH-type) family protein / RNA recognition motif (RRM)-containing protein | chr3:10257681-10261330 REVERSE LENGTH=908	LOC_Os04g32340.1 protein|RNA-binding motif protein, putative, expressed	LOC_Os04g32340.1 protein|RNA-binding motif protein, putative, expressed	LOC_Os04g32340.1 protein|RNA-binding motif protein, putative, expressed
Homoeologous triplet 235	TRIAE_CS42_1AL_TGACv1_000549_AA0014490	TRIAE_CS42_1BL_TGACv1_032481_AA0130370	TRIAE_CS42_1DL_TGACv1_061133_AA0186390	AB-D	1	1	6	0.692996	0.540043	0.742461	93	140	262	20	120	44	AT3G14470.1 | Symbols: | NB-ARC domain-containing disease resistance protein | chr3:4857940-4861104 FORWARD LENGTH=1054	AT3G14470.1 | Symbols: | NB-ARC domain-containing disease resistance protein | chr3:4857940-4861104 FORWARD LENGTH=1054	AT3G14470.1 | Symbols: | NB-ARC domain-containing disease resistance protein | chr3:4857940-4861104 FORWARD LENGTH=1054	LOC_Os05g41290.1 protein|disease resistance RPP13-like protein 1, putative, expressed	LOC_Os05g41290.1 protein|disease resistance RPP13-like protein 1, putative, expressed	LOC_Os05g41290.1 protein|disease resistance RPP13-like protein 1, putative, expressed
Homoeologous triplet 236	TRIAE_CS42_1AL_TGACv1_000549_AA0014510	TRIAE_CS42_1BL_TGACv1_030909_AA0103560	TRIAE_CS42_1DL_TGACv1_062645_AA0217650	ABD	4	4	4	0.984434	0.96765	0.961114	47	53	46	0	0	0	AT5G12180.1 | Symbols: CPK17 | calcium-dependent protein kinase 17 | chr5:3937136-3939323 FORWARD LENGTH=528	AT5G12180.1 | Symbols: CPK17 | calcium-dependent protein kinase 17 | chr5:3937136-3939323 FORWARD LENGTH=528	AT5G12180.1 | Symbols: CPK17 | calcium-dependent protein kinase 17 | chr5:3937136-3939323 FORWARD LENGTH=528	LOC_Os01g59360.1 protein|CAMK_CAMK_like.10 - CAMK includes calcium/calmodulin depedent protein kinases, expressed	LOC_Os01g59360.1 protein|CAMK_CAMK_like.10 - CAMK includes calcium/calmodulin depedent protein kinases, expressed	LOC_Os01g59360.1 protein|CAMK_CAMK_like.10 - CAMK includes calcium/calmodulin depedent protein kinases, expressed
Homoeologous triplet 237	TRIAE_CS42_1AL_TGACv1_000553_AA0014580	TRIAE_CS42_1BL_TGACv1_030264_AA0084370	TRIAE_CS42_1DL_TGACv1_062818_AA0220400	ABD	1	1	1	0.885632	0.727886	0.804557	641	429	521	218	81	81	AT1G32090.1 | Symbols: | early-responsive to dehydration stress protein (ERD4) | chr1:11540244-11544041 REVERSE LENGTH=806	AT1G32090.1 | Symbols: | early-responsive to dehydration stress protein (ERD4) | chr1:11540244-11544041 REVERSE LENGTH=806	AT1G32090.1 | Symbols: | early-responsive to dehydration stress protein (ERD4) | chr1:11540244-11544041 REVERSE LENGTH=806	LOC_Os10g42820.1 protein|early-responsive to dehydration protein-related, putative, expressed, LOC_Os10g42820.2 protein|early-responsive to dehydration protein-related, putative, expressed	LOC_Os10g42820.1 protein|early-responsive to dehydration protein-related, putative, expressed, LOC_Os10g42820.2 protein|early-responsive to dehydration protein-related, putative, expressed	LOC_Os10g42820.1 protein|early-responsive to dehydration protein-related, putative, expressed, LOC_Os10g42820.2 protein|early-responsive to dehydration protein-related, putative, expressed
Homoeologous triplet 238	TRIAE_CS42_1AL_TGACv1_000553_AA0014560	TRIAE_CS42_1BL_TGACv1_031985_AA0123820	TRIAE_CS42_1DL_TGACv1_062818_AA0220430	ABD	1	1	1	0.810705	0.7173	0.708973	694	707	710	13	5	29	AT4G15130.1 | Symbols: ATCCT2, CCT2 | phosphorylcholine cytidylyltransferase2 | chr4:8637793-8639388 FORWARD LENGTH=304	AT4G15130.1 | Symbols: ATCCT2, CCT2 | phosphorylcholine cytidylyltransferase2 | chr4:8637793-8639388 FORWARD LENGTH=304	AT4G15130.1 | Symbols: ATCCT2, CCT2 | phosphorylcholine cytidylyltransferase2 | chr4:8637793-8639388 FORWARD LENGTH=304	LOC_Os10g42790.1 protein|cytidylyltransferase domain containing protein, expressed	LOC_Os10g42790.1 protein|cytidylyltransferase domain containing protein, expressed	LOC_Os10g42790.1 protein|cytidylyltransferase domain containing protein, expressed
Homoeologous triplet 239	TRIAE_CS42_1AL_TGACv1_000553_AA0014550	TRIAE_CS42_1BL_TGACv1_031985_AA0123830	TRIAE_CS42_1DL_TGACv1_062818_AA0220440	ABD	2	2	2	0.994042	0.948266	0.946318	531	526	516	0	49	49	AT1G32080.1 | Symbols: | membrane protein, putative | chr1:11537572-11539756 REVERSE LENGTH=512	AT1G32080.1 | Symbols: | membrane protein, putative | chr1:11537572-11539756 REVERSE LENGTH=512	AT1G32080.1 | Symbols: | membrane protein, putative | chr1:11537572-11539756 REVERSE LENGTH=512	LOC_Os10g42780.3 protein|lrgB-like family protein, expressed, LOC_Os10g42780.5 protein|lrgB-like family protein, expressed, LOC_Os10g42780.1 protein|lrgB-like family protein, expressed, LOC_Os10g42780.6 protein|lrgB-like family protein, expressed, LOC_Os10g42780.2 protein|lrgB-like family protein, expressed	LOC_Os10g42780.3 protein|lrgB-like family protein, expressed, LOC_Os10g42780.5 protein|lrgB-like family protein, expressed, LOC_Os10g42780.1 protein|lrgB-like family protein, expressed, LOC_Os10g42780.6 protein|lrgB-like family protein, expressed, LOC_Os10g42780.2 protein|lrgB-like family protein, expressed	LOC_Os10g42780.3 protein|lrgB-like family protein, expressed, LOC_Os10g42780.5 protein|lrgB-like family protein, expressed, LOC_Os10g42780.1 protein|lrgB-like family protein, expressed, LOC_Os10g42780.6 protein|lrgB-like family protein, expressed, LOC_Os10g42780.2 protein|lrgB-like family protein, expressed
Homoeologous triplet 240	TRIAE_CS42_1AL_TGACv1_000555_AA0014630	TRIAE_CS42_1BL_TGACv1_034154_AA0143650	TRIAE_CS42_1DL_TGACv1_061492_AA0196800	ABD	1	1	1	0.953656	0.966319	0.97274	263	288	291	3	3	0	AT5G46570.1 | Symbols: BSK2 | BR-signaling kinase 2 | chr5:18894687-18897198 FORWARD LENGTH=489	AT5G46570.1 | Symbols: BSK2 | BR-signaling kinase 2 | chr5:18894687-18897198 FORWARD LENGTH=489	AT5G46570.1 | Symbols: BSK2 | BR-signaling kinase 2 | chr5:18894687-18897198 FORWARD LENGTH=489	LOC_Os10g42110.1 protein|protein kinase family protein, putative, expressed	LOC_Os10g42110.1 protein|protein kinase family protein, putative, expressed	LOC_Os10g42110.1 protein|protein kinase family protein, putative, expressed
Homoeologous triplet 241	TRIAE_CS42_1AL_TGACv1_000555_AA0014640	TRIAE_CS42_1BL_TGACv1_033928_AA0142640	TRIAE_CS42_1DL_TGACv1_063379_AA0226840	ABD	9	9	9	0.754897	0.841121	0.746219	31	65	74	15	9	10	AT4G17980.1 | Symbols: anac071, NAC071 | NAC domain containing protein 71 | chr4:9978850-9980038 REVERSE LENGTH=262	AT4G17980.1 | Symbols: anac071, NAC071 | NAC domain containing protein 71 | chr4:9978850-9980038 REVERSE LENGTH=262	AT4G17980.1 | Symbols: anac071, NAC071 | NAC domain containing protein 71 | chr4:9978850-9980038 REVERSE LENGTH=262	LOC_Os10g42130.1 protein|no apical meristem protein, putative, expressed	LOC_Os10g42130.1 protein|no apical meristem protein, putative, expressed	LOC_Os10g42130.1 protein|no apical meristem protein, putative, expressed
Homoeologous triplet 242	TRIAE_CS42_1AL_TGACv1_000562_AA0014700	TRIAE_CS42_1BL_TGACv1_034560_AA0144870	TRIAE_CS42_1DL_TGACv1_064070_AA0232410	ABD	8	8	8	0.953208	0.958223	0.958758	712	712	727	0	0	5	AT3G15970.1 | Symbols: | NUP50 (Nucleoporin 50 kDa) protein | chr3:5408982-5410379 REVERSE LENGTH=465	AT3G15970.1 | Symbols: | NUP50 (Nucleoporin 50 kDa) protein | chr3:5408982-5410379 REVERSE LENGTH=465	AT3G15970.1 | Symbols: | NUP50 (Nucleoporin 50 kDa) protein | chr3:5408982-5410379 REVERSE LENGTH=465	LOC_Os05g28190.1 protein|ranBP1 domain containing protein, expressed	LOC_Os05g28190.1 protein|ranBP1 domain containing protein, expressed	LOC_Os05g28190.1 protein|ranBP1 domain containing protein, expressed
Homoeologous triplet 243	TRIAE_CS42_1AL_TGACv1_000567_AA0014810	TRIAE_CS42_1BL_TGACv1_032456_AA0130110	TRIAE_CS42_1DL_TGACv1_061726_AA0202480	ABD	1	1	1	0.856236	0.906899	0.742799	703	706	703	46	12	66	AT5G62530.1 | Symbols: ALDH12A1, ATP5CDH, P5CDH | aldehyde dehydrogenase 12A1 | chr5:25099768-25103159 REVERSE LENGTH=556	AT5G62530.1 | Symbols: ALDH12A1, ATP5CDH, P5CDH | aldehyde dehydrogenase 12A1 | chr5:25099768-25103159 REVERSE LENGTH=556	AT5G62530.1 | Symbols: ALDH12A1, ATP5CDH, P5CDH | aldehyde dehydrogenase 12A1 | chr5:25099768-25103159 REVERSE LENGTH=556	LOC_Os12g40440.1 protein|expressed protein	LOC_Os12g40440.1 protein|expressed protein	LOC_Os12g40440.1 protein|expressed protein
Homoeologous triplet 244	TRIAE_CS42_1AL_TGACv1_000567_AA0014820	TRIAE_CS42_1BL_TGACv1_032456_AA0130120	TRIAE_CS42_1DL_TGACv1_061726_AA0202490	A-B-D	6	1	5	0.81562	0.832867	0.858507	525	397	490	21	7	2	AT4G09720.1 | Symbols: ATRABG3A, RABG3A | RAB GTPase homolog G3A | chr4:6133101-6134959 FORWARD LENGTH=206, AT4G09720.2 | Symbols: ATRABG3A, RABG3A | RAB GTPase homolog G3A | chr4:6133405-6134959 FORWARD LENGTH=172, AT4G09720.3 | Symbols: ATRABG3A, RABG3A | RAB GTPase homolog G3A | chr4:6133101-6134959 FORWARD LENGTH=217, AT4G09720.4 | Symbols: RABG3A | RAB GTPase homolog G3A | chr4:6133101-61349…	AT4G09720.1 | Symbols: ATRABG3A, RABG3A | RAB GTPase homolog G3A | chr4:6133101-6134959 FORWARD LENGTH=206, AT4G09720.2 | Symbols: ATRABG3A, RABG3A | RAB GTPase homolog G3A | chr4:6133405-6134959 FORWARD LENGTH=172, AT4G09720.3 | Symbols: ATRABG3A, RABG3A | RAB GTPase homolog G3A | chr4:6133101-6134959 FORWARD LENGTH=217, AT4G09720.4 | Symbols: RABG3A | RAB GTPase homolog G3A | chr4:6133101-61349…	AT4G09720.1 | Symbols: ATRABG3A, RABG3A | RAB GTPase homolog G3A | chr4:6133101-6134959 FORWARD LENGTH=206, AT4G09720.2 | Symbols: ATRABG3A, RABG3A | RAB GTPase homolog G3A | chr4:6133405-6134959 FORWARD LENGTH=172, AT4G09720.3 | Symbols: ATRABG3A, RABG3A | RAB GTPase homolog G3A | chr4:6133101-6134959 FORWARD LENGTH=217, AT4G09720.4 | Symbols: RABG3A | RAB GTPase homolog G3A | chr4:6133101-61349…	LOC_Os05g46000.1 protein|ras-related protein, putative, expressed	LOC_Os05g46000.1 protein|ras-related protein, putative, expressed	LOC_Os05g46000.1 protein|ras-related protein, putative, expressed
Homoeologous triplet 245	TRIAE_CS42_1AL_TGACv1_000567_AA0014770	TRIAE_CS42_1BL_TGACv1_032362_AA0128930	TRIAE_CS42_1DL_TGACv1_061528_AA0197840	ABD	1	1	1	0.770287	0.852787	0.834659	722	672	726	51	0	51	AT5G15090.1 | Symbols: VDAC3, ATVDAC3 | voltage dependent anion channel 3 | chr5:4889641-4891389 REVERSE LENGTH=274, AT5G15090.2 | Symbols: VDAC3 | voltage dependent anion channel 3 | chr5:4889641-4891389 REVERSE LENGTH=274	AT5G15090.1 | Symbols: VDAC3, ATVDAC3 | voltage dependent anion channel 3 | chr5:4889641-4891389 REVERSE LENGTH=274, AT5G15090.2 | Symbols: VDAC3 | voltage dependent anion channel 3 | chr5:4889641-4891389 REVERSE LENGTH=274	AT5G15090.1 | Symbols: VDAC3, ATVDAC3 | voltage dependent anion channel 3 | chr5:4889641-4891389 REVERSE LENGTH=274, AT5G15090.2 | Symbols: VDAC3 | voltage dependent anion channel 3 | chr5:4889641-4891389 REVERSE LENGTH=274	LOC_Os05g45950.1 protein|outer mitochondrial membrane porin, putative, expressed	LOC_Os05g45950.1 protein|outer mitochondrial membrane porin, putative, expressed	LOC_Os05g45950.1 protein|outer mitochondrial membrane porin, putative, expressed
Homoeologous triplet 246	TRIAE_CS42_1AL_TGACv1_000567_AA0014760	TRIAE_CS42_1BL_TGACv1_032362_AA0128940	TRIAE_CS42_1DL_TGACv1_061528_AA0197830	ABD	1	1	1	0.936811	0.936908	0.953929	667	546	582	104	51	5	AT1G74690.1 | Symbols: IQD31 | IQ-domain 31 | chr1:28061498-28063924 REVERSE LENGTH=587	AT1G74690.1 | Symbols: IQD31 | IQ-domain 31 | chr1:28061498-28063924 REVERSE LENGTH=587	AT1G74690.1 | Symbols: IQD31 | IQ-domain 31 | chr1:28061498-28063924 REVERSE LENGTH=587	LOC_Os05g45930.2 protein|IQ calmodulin-binding motif family protein, putative, expressed, LOC_Os05g45930.1 protein|IQ calmodulin-binding motif family protein, putative, expressed	LOC_Os05g45930.2 protein|IQ calmodulin-binding motif family protein, putative, expressed, LOC_Os05g45930.1 protein|IQ calmodulin-binding motif family protein, putative, expressed	LOC_Os05g45930.2 protein|IQ calmodulin-binding motif family protein, putative, expressed, LOC_Os05g45930.1 protein|IQ calmodulin-binding motif family protein, putative, expressed
Homoeologous triplet 247	TRIAE_CS42_1AL_TGACv1_000569_AA0014860	TRIAE_CS42_1BL_TGACv1_032555_AA0131430	TRIAE_CS42_1DL_TGACv1_064367_AA0234130	AD-B	2	6	2	0.626067	0.693975	0.403113	126	176	137	97	71	113	AT4G35160.1 | Symbols: | O-methyltransferase family protein | chr4:16730989-16732808 REVERSE LENGTH=382	AT4G35160.1 | Symbols: | O-methyltransferase family protein | chr4:16730989-16732808 REVERSE LENGTH=382	AT4G35160.1 | Symbols: | O-methyltransferase family protein | chr4:16730989-16732808 REVERSE LENGTH=382	LOC_Os12g25450.1 protein|O-methyltransferase, putative, expressed	LOC_Os12g25450.1 protein|O-methyltransferase, putative, expressed	LOC_Os12g25450.1 protein|O-methyltransferase, putative, expressed
Homoeologous triplet 248	TRIAE_CS42_1AL_TGACv1_000576_AA0014940	TRIAE_CS42_1BL_TGACv1_030671_AA0097480	TRIAE_CS42_1DL_TGACv1_064773_AA0235680	ABD	1	1	1	0.70391	0.789566	0.896329	381	202	269	242	162	53	AT3G20370.1 | Symbols: | TRAF-like family protein | chr3:7105481-7107079 FORWARD LENGTH=379	AT3G20370.1 | Symbols: | TRAF-like family protein | chr3:7105481-7107079 FORWARD LENGTH=379	AT3G20370.1 | Symbols: | TRAF-like family protein | chr3:7105481-7107079 FORWARD LENGTH=379	LOC_Os10g33830.1 protein|MATH domain containing protein, expressed	LOC_Os10g33830.1 protein|MATH domain containing protein, expressed	LOC_Os10g33830.1 protein|MATH domain containing protein, expressed
Homoeologous triplet 249	TRIAE_CS42_1AL_TGACv1_000580_AA0014970	TRIAE_CS42_1BL_TGACv1_030440_AA0090770	TRIAE_CS42_1DL_TGACv1_063123_AA0224200	ABD	4	4	4	0.984961	0.977501	0.973978	100	78	62	15	45	7	AT1G02260.1 | Symbols: | Divalent ion symporter | chr1:440757-442459 REVERSE LENGTH=502	AT1G02260.1 | Symbols: | Divalent ion symporter | chr1:440757-442459 REVERSE LENGTH=502	AT1G02260.1 | Symbols: | Divalent ion symporter | chr1:440757-442459 REVERSE LENGTH=502	LOC_Os10g39980.1 protein|expressed protein	LOC_Os10g39980.1 protein|expressed protein	LOC_Os10g39980.1 protein|expressed protein
Homoeologous triplet 250	TRIAE_CS42_1AL_TGACv1_000581_AA0015070	TRIAE_CS42_1BL_TGACv1_031467_AA0114620	TRIAE_CS42_1DL_TGACv1_061575_AA0198950	ABD	1	1	1	0.596502	0.666108	0.544607	51	127	28	12	2	18	AT1G26470.1 | Symbols: | FUNCTIONS IN: molecular_function unknown; INVOLVED IN: regulation of transcription; LOCATED IN: nucleus, H4/H2A histone acetyltransferase complex; EXPRESSED IN: 23 plant structures; EXPRESSED DURING: 15 growth stages; CONTAINS InterPro DOMAIN/s: CT20 (InterPro:IPR012423); Has 60 Blast hits to 60 proteins in 27 species: Archae - 0; Bacteria - 0; Metazoa - 26; Fungi - 2; Pl…	AT1G26470.1 | Symbols: | FUNCTIONS IN: molecular_function unknown; INVOLVED IN: regulation of transcription; LOCATED IN: nucleus, H4/H2A histone acetyltransferase complex; EXPRESSED IN: 23 plant structures; EXPRESSED DURING: 15 growth stages; CONTAINS InterPro DOMAIN/s: CT20 (InterPro:IPR012423); Has 60 Blast hits to 60 proteins in 27 species: Archae - 0; Bacteria - 0; Metazoa - 26; Fungi - 2; Pl…	AT1G26470.1 | Symbols: | FUNCTIONS IN: molecular_function unknown; INVOLVED IN: regulation of transcription; LOCATED IN: nucleus, H4/H2A histone acetyltransferase complex; EXPRESSED IN: 23 plant structures; EXPRESSED DURING: 15 growth stages; CONTAINS InterPro DOMAIN/s: CT20 (InterPro:IPR012423); Has 60 Blast hits to 60 proteins in 27 species: Archae - 0; Bacteria - 0; Metazoa - 26; Fungi - 2; Pl…	LOC_Os05g43680.1 protein|expressed protein	LOC_Os05g43680.1 protein|expressed protein	LOC_Os05g43680.1 protein|expressed protein
Homoeologous triplet 251	TRIAE_CS42_1AL_TGACv1_000581_AA0014990	TRIAE_CS42_1BL_TGACv1_031398_AA0113170	TRIAE_CS42_1DL_TGACv1_062004_AA0207310	ABD	3	3	3	0.900018	0.897265	0.910741	20	40	32	9	2	3	No hits found	No hits found	No hits found	LOC_Os05g43640.1 protein|retrotransposon, putative, centromere-specific, expressed	LOC_Os05g43640.1 protein|retrotransposon, putative, centromere-specific, expressed	LOC_Os05g43640.1 protein|retrotransposon, putative, centromere-specific, expressed
Homoeologous triplet 252	TRIAE_CS42_1AL_TGACv1_000581_AA0015030	TRIAE_CS42_1BL_TGACv1_031467_AA0114660	TRIAE_CS42_1DL_TGACv1_064543_AA0234810	BD-A	2	6	6	0.949171	0.97531	0.961234	476	481	490	9	7	15	AT3G01060.2 | Symbols: | unknown protein; Has 637 Blast hits to 635 proteins in 201 species: Archae - 0; Bacteria - 291; Metazoa - 0; Fungi - 72; Plants - 72; Viruses - 0; Other Eukaryotes - 202 (source: NCBI BLink). | chr3:16831-18782 REVERSE LENGTH=447, AT3G01060.3 | Symbols: | unknown protein; Has 35333 Blast hits to 34131 proteins in 2444 species: Archae - 798; Bacteria - 22429; Metazoa - 974…	AT3G01060.2 | Symbols: | unknown protein; Has 637 Blast hits to 635 proteins in 201 species: Archae - 0; Bacteria - 291; Metazoa - 0; Fungi - 72; Plants - 72; Viruses - 0; Other Eukaryotes - 202 (source: NCBI BLink). | chr3:16831-18782 REVERSE LENGTH=447, AT3G01060.3 | Symbols: | unknown protein; Has 35333 Blast hits to 34131 proteins in 2444 species: Archae - 798; Bacteria - 22429; Metazoa - 974…	AT3G01060.2 | Symbols: | unknown protein; Has 637 Blast hits to 635 proteins in 201 species: Archae - 0; Bacteria - 291; Metazoa - 0; Fungi - 72; Plants - 72; Viruses - 0; Other Eukaryotes - 202 (source: NCBI BLink). | chr3:16831-18782 REVERSE LENGTH=447, AT3G01060.3 | Symbols: | unknown protein; Has 35333 Blast hits to 34131 proteins in 2444 species: Archae - 798; Bacteria - 22429; Metazoa - 974…	LOC_Os05g43650.1 protein|expressed protein	LOC_Os05g43650.1 protein|expressed protein	LOC_Os05g43650.1 protein|expressed protein
Homoeologous triplet 253	TRIAE_CS42_1AL_TGACv1_000582_AA0015150	TRIAE_CS42_1BL_TGACv1_030963_AA0104630	TRIAE_CS42_1DL_TGACv1_062276_AA0211780	BD-A	10	3	3	0.495109	0.768308	0.607244	35	15	64	16	31	49	AT4G27970.1 | Symbols: SLAH2 | SLAC1 homologue 2 | chr4:13918290-13920122 REVERSE LENGTH=519	AT4G27970.1 | Symbols: SLAH2 | SLAC1 homologue 2 | chr4:13918290-13920122 REVERSE LENGTH=519	AT4G27970.1 | Symbols: SLAH2 | SLAC1 homologue 2 | chr4:13918290-13920122 REVERSE LENGTH=519	LOC_Os01g43460.1 protein|C4-dicarboxylate transporter/malic acid transport protein, expressed, LOC_Os01g43460.2 protein|C4-dicarboxylate transporter/malic acid transport protein, expressed	LOC_Os01g43460.1 protein|C4-dicarboxylate transporter/malic acid transport protein, expressed, LOC_Os01g43460.2 protein|C4-dicarboxylate transporter/malic acid transport protein, expressed	LOC_Os01g43460.1 protein|C4-dicarboxylate transporter/malic acid transport protein, expressed, LOC_Os01g43460.2 protein|C4-dicarboxylate transporter/malic acid transport protein, expressed
Homoeologous triplet 254	TRIAE_CS42_1AL_TGACv1_000582_AA0015140	TRIAE_CS42_1BL_TGACv1_030963_AA0104620	TRIAE_CS42_1DL_TGACv1_061654_AA0201150	BD-A	3	10	10	0.813698	0.791291	0.852657	46	78	19	26	33	46	AT4G27970.1 | Symbols: SLAH2 | SLAC1 homologue 2 | chr4:13918290-13920122 REVERSE LENGTH=519	AT4G27970.1 | Symbols: SLAH2 | SLAC1 homologue 2 | chr4:13918290-13920122 REVERSE LENGTH=519	AT4G27970.1 | Symbols: SLAH2 | SLAC1 homologue 2 | chr4:13918290-13920122 REVERSE LENGTH=519	LOC_Os01g43460.1 protein|C4-dicarboxylate transporter/malic acid transport protein, expressed, LOC_Os01g43460.2 protein|C4-dicarboxylate transporter/malic acid transport protein, expressed	LOC_Os01g43460.1 protein|C4-dicarboxylate transporter/malic acid transport protein, expressed, LOC_Os01g43460.2 protein|C4-dicarboxylate transporter/malic acid transport protein, expressed	LOC_Os01g43460.1 protein|C4-dicarboxylate transporter/malic acid transport protein, expressed, LOC_Os01g43460.2 protein|C4-dicarboxylate transporter/malic acid transport protein, expressed
Homoeologous triplet 255	TRIAE_CS42_1AL_TGACv1_000583_AA0015240	TRIAE_CS42_1BL_TGACv1_032447_AA0129970	TRIAE_CS42_1DL_TGACv1_061147_AA0186960	ABD	15	15	15	0.867222	0.902632	0.911675	91	224	249	154	181	31	AT1G75250.1 | Symbols: ATRL6, RSM3, RL6 | RAD-like 6 | chr1:28245073-28245453 REVERSE LENGTH=126, AT1G75250.2 | Symbols: ATRL6, RSM3, RL6 | RAD-like 6 | chr1:28244463-28245453 REVERSE LENGTH=97	AT1G75250.1 | Symbols: ATRL6, RSM3, RL6 | RAD-like 6 | chr1:28245073-28245453 REVERSE LENGTH=126, AT1G75250.2 | Symbols: ATRL6, RSM3, RL6 | RAD-like 6 | chr1:28244463-28245453 REVERSE LENGTH=97	AT1G75250.1 | Symbols: ATRL6, RSM3, RL6 | RAD-like 6 | chr1:28245073-28245453 REVERSE LENGTH=126, AT1G75250.2 | Symbols: ATRL6, RSM3, RL6 | RAD-like 6 | chr1:28244463-28245453 REVERSE LENGTH=97	LOC_Os05g50340.1 protein|MYB family transcription factor, putative, expressed	LOC_Os05g50340.1 protein|MYB family transcription factor, putative, expressed	LOC_Os05g50340.1 protein|MYB family transcription factor, putative, expressed
Homoeologous triplet 256	TRIAE_CS42_1AL_TGACv1_000583_AA0015220	TRIAE_CS42_1BL_TGACv1_032447_AA0129980	TRIAE_CS42_1DL_TGACv1_061147_AA0186940	ABD	1	1	1	0.748509	0.771023	0.791943	319	278	85	9	26	10	AT2G18290.1 | Symbols: APC10 | anaphase promoting complex 10 | chr2:7948522-7950096 REVERSE LENGTH=192	AT2G18290.1 | Symbols: APC10 | anaphase promoting complex 10 | chr2:7948522-7950096 REVERSE LENGTH=192	AT2G18290.1 | Symbols: APC10 | anaphase promoting complex 10 | chr2:7948522-7950096 REVERSE LENGTH=192	LOC_Os05g50360.1 protein|anaphase-promoting complex subunit 10, putative, expressed	LOC_Os05g50360.1 protein|anaphase-promoting complex subunit 10, putative, expressed	LOC_Os05g50360.1 protein|anaphase-promoting complex subunit 10, putative, expressed
Homoeologous triplet 257	TRIAE_CS42_1AL_TGACv1_000591_AA0015400	TRIAE_CS42_1BL_TGACv1_031589_AA0116600	TRIAE_CS42_1DL_TGACv1_061096_AA0185030	ABD	13	13	13	0.996754	0.995497	0.996379	514	556	553	3	3	2	AT2G20560.1 | Symbols: | DNAJ heat shock family protein | chr2:8848353-8849815 REVERSE LENGTH=337	AT2G20560.1 | Symbols: | DNAJ heat shock family protein | chr2:8848353-8849815 REVERSE LENGTH=337	AT2G20560.1 | Symbols: | DNAJ heat shock family protein | chr2:8848353-8849815 REVERSE LENGTH=337	LOC_Os05g48810.1 protein|dnaJ domain containing protein, expressed	LOC_Os05g48810.1 protein|dnaJ domain containing protein, expressed	LOC_Os05g48810.1 protein|dnaJ domain containing protein, expressed
Homoeologous triplet 258	TRIAE_CS42_1AL_TGACv1_000591_AA0015390	TRIAE_CS42_1BL_TGACv1_031589_AA0116570	TRIAE_CS42_1DL_TGACv1_061096_AA0185050	ABD	1	1	1	0.975232	0.952697	0.96256	727	727	727	2	117	52	AT3G05700.1 | Symbols: | Drought-responsive family protein | chr3:1682432-1684323 REVERSE LENGTH=223	AT3G05700.1 | Symbols: | Drought-responsive family protein | chr3:1682432-1684323 REVERSE LENGTH=223	AT3G05700.1 | Symbols: | Drought-responsive family protein | chr3:1682432-1684323 REVERSE LENGTH=223	LOC_Os05g48800.3 protein|drought induced 19 protein, putative, expressed, LOC_Os05g48800.2 protein|drought induced 19 protein, putative, expressed, LOC_Os05g48800.1 protein|drought induced 19 protein, putative, expressed	LOC_Os05g48800.3 protein|drought induced 19 protein, putative, expressed, LOC_Os05g48800.2 protein|drought induced 19 protein, putative, expressed, LOC_Os05g48800.1 protein|drought induced 19 protein, putative, expressed	LOC_Os05g48800.3 protein|drought induced 19 protein, putative, expressed, LOC_Os05g48800.2 protein|drought induced 19 protein, putative, expressed, LOC_Os05g48800.1 protein|drought induced 19 protein, putative, expressed
Homoeologous triplet 259	TRIAE_CS42_1AL_TGACv1_000592_AA0015410	TRIAE_CS42_1BL_TGACv1_033186_AA0137610	TRIAE_CS42_1DL_TGACv1_061101_AA0185220	ABD	5	5	5	0.972582	0.962591	0.986697	37	85	40	58	6	41	AT4G22460.1 | Symbols: | Bifunctional inhibitor/lipid-transfer protein/seed storage 2S albumin superfamily protein | chr4:11839160-11839561 REVERSE LENGTH=133	AT2G45180.1 | Symbols: | Bifunctional inhibitor/lipid-transfer protein/seed storage 2S albumin superfamily protein | chr2:18626377-18626781 FORWARD LENGTH=134	AT4G22460.1 | Symbols: | Bifunctional inhibitor/lipid-transfer protein/seed storage 2S albumin superfamily protein | chr4:11839160-11839561 REVERSE LENGTH=133	LOC_Os10g40520.1 protein|LTPL145 - Protease inhibitor/seed storage/LTP family protein precursor, expressed	LOC_Os10g40520.1 protein|LTPL145 - Protease inhibitor/seed storage/LTP family protein precursor, expressed	LOC_Os10g40520.1 protein|LTPL145 - Protease inhibitor/seed storage/LTP family protein precursor, expressed
Homoeologous triplet 260	TRIAE_CS42_1AL_TGACv1_000597_AA0015460	TRIAE_CS42_1BL_TGACv1_031677_AA0118590	TRIAE_CS42_1DL_TGACv1_063203_AA0224910	ABD	1	1	1	0.857187	0.85708	0.848955	557	556	423	0	43	17	AT1G43130.1 | Symbols: LCV2 | like COV 2 | chr1:16228661-16231158 REVERSE LENGTH=261	AT1G43130.1 | Symbols: LCV2 | like COV 2 | chr1:16228661-16231158 REVERSE LENGTH=261	AT1G43130.1 | Symbols: LCV2 | like COV 2 | chr1:16228661-16231158 REVERSE LENGTH=261	LOC_Os05g36110.4 protein|protein of unknown function DUF502 domain containing protein, expressed, LOC_Os05g36110.2 protein|protein of unknown function DUF502 domain containing protein, expressed, LOC_Os05g36110.3 protein|protein of unknown function DUF502 domain containing protein, expressed, LOC_Os05g36110.1 protein|protein of unknown function DUF502 domain containing protein, expressed	LOC_Os05g36110.4 protein|protein of unknown function DUF502 domain containing protein, expressed, LOC_Os05g36110.2 protein|protein of unknown function DUF502 domain containing protein, expressed, LOC_Os05g36110.3 protein|protein of unknown function DUF502 domain containing protein, expressed, LOC_Os05g36110.1 protein|protein of unknown function DUF502 domain containing protein, expressed	LOC_Os05g36110.4 protein|protein of unknown function DUF502 domain containing protein, expressed, LOC_Os05g36110.2 protein|protein of unknown function DUF502 domain containing protein, expressed, LOC_Os05g36110.3 protein|protein of unknown function DUF502 domain containing protein, expressed, LOC_Os05g36110.1 protein|protein of unknown function DUF502 domain containing protein, expressed
Homoeologous triplet 261	TRIAE_CS42_1AL_TGACv1_000597_AA0015490	TRIAE_CS42_1BL_TGACv1_030779_AA0100640	TRIAE_CS42_1DL_TGACv1_061979_AA0206770	ABD	1	1	1	0.832556	0.919313	0.904835	286	295	273	58	13	5	AT1G01540.1 | Symbols: | Protein kinase superfamily protein | chr1:195980-197973 FORWARD LENGTH=386, AT1G01540.2 | Symbols: | Protein kinase superfamily protein | chr1:195980-198383 FORWARD LENGTH=472	AT1G01540.1 | Symbols: | Protein kinase superfamily protein | chr1:195980-197973 FORWARD LENGTH=386, AT1G01540.2 | Symbols: | Protein kinase superfamily protein | chr1:195980-198383 FORWARD LENGTH=472	AT1G01540.1 | Symbols: | Protein kinase superfamily protein | chr1:195980-197973 FORWARD LENGTH=386, AT1G01540.2 | Symbols: | Protein kinase superfamily protein | chr1:195980-198383 FORWARD LENGTH=472	LOC_Os05g36050.1 protein|serine/threonine-protein kinase, putative, expressed	LOC_Os05g36050.1 protein|serine/threonine-protein kinase, putative, expressed	LOC_Os05g36050.1 protein|serine/threonine-protein kinase, putative, expressed
Homoeologous triplet 262	TRIAE_CS42_1AL_TGACv1_000597_AA0015480	TRIAE_CS42_1BL_TGACv1_030779_AA0100650	TRIAE_CS42_1DL_TGACv1_061979_AA0206760	ABD	1	1	1	0.872571	0.784221	0.903218	681	666	665	0	2	2	AT4G24630.1 | Symbols: | DHHC-type zinc finger family protein | chr4:12714919-12717111 FORWARD LENGTH=407	AT4G24630.1 | Symbols: | DHHC-type zinc finger family protein | chr4:12714919-12717111 FORWARD LENGTH=407	AT4G24630.1 | Symbols: | DHHC-type zinc finger family protein | chr4:12714919-12717111 FORWARD LENGTH=407	LOC_Os05g36090.1 protein|zinc finger DHHC domain-containing protein, putative, expressed	LOC_Os05g36090.1 protein|zinc finger DHHC domain-containing protein, putative, expressed	LOC_Os05g36090.1 protein|zinc finger DHHC domain-containing protein, putative, expressed
Homoeologous triplet 263	TRIAE_CS42_1AL_TGACv1_000597_AA0015450	TRIAE_CS42_1BL_TGACv1_031677_AA0118580	TRIAE_CS42_1DL_TGACv1_063203_AA0224930	ABD	1	1	1	0.854274	0.890563	0.937702	45	284	241	114	59	1	AT1G43190.1 | Symbols: PTB3 | polypyrimidine tract-binding protein 3 | chr1:16275432-16278185 REVERSE LENGTH=432, AT1G43190.2 | Symbols: PTB3 | polypyrimidine tract-binding protein 3 | chr1:16275432-16278185 REVERSE LENGTH=432, AT1G43190.3 | Symbols: PTB3 | polypyrimidine tract-binding protein 3 | chr1:16275432-16278185 REVERSE LENGTH=430	AT1G43190.1 | Symbols: PTB3 | polypyrimidine tract-binding protein 3 | chr1:16275432-16278185 REVERSE LENGTH=432, AT1G43190.2 | Symbols: PTB3 | polypyrimidine tract-binding protein 3 | chr1:16275432-16278185 REVERSE LENGTH=432, AT1G43190.3 | Symbols: PTB3 | polypyrimidine tract-binding protein 3 | chr1:16275432-16278185 REVERSE LENGTH=430	AT1G43190.1 | Symbols: PTB3 | polypyrimidine tract-binding protein 3 | chr1:16275432-16278185 REVERSE LENGTH=432, AT1G43190.2 | Symbols: PTB3 | polypyrimidine tract-binding protein 3 | chr1:16275432-16278185 REVERSE LENGTH=432, AT1G43190.3 | Symbols: PTB3 | polypyrimidine tract-binding protein 3 | chr1:16275432-16278185 REVERSE LENGTH=430	LOC_Os05g36120.1 protein|polypyrimidine tract-binding protein, putative, expressed, LOC_Os05g36120.2 protein|polypyrimidine tract-binding protein, putative, expressed, LOC_Os05g36120.3 protein|polypyrimidine tract-binding protein, putative, expressed	LOC_Os05g36120.1 protein|polypyrimidine tract-binding protein, putative, expressed, LOC_Os05g36120.2 protein|polypyrimidine tract-binding protein, putative, expressed, LOC_Os05g36120.3 protein|polypyrimidine tract-binding protein, putative, expressed	LOC_Os05g36120.1 protein|polypyrimidine tract-binding protein, putative, expressed, LOC_Os05g36120.2 protein|polypyrimidine tract-binding protein, putative, expressed, LOC_Os05g36120.3 protein|polypyrimidine tract-binding protein, putative, expressed
Homoeologous triplet 264	TRIAE_CS42_1AL_TGACv1_000601_AA0015510	TRIAE_CS42_1BL_TGACv1_033957_AA0142830	TRIAE_CS42_1DL_TGACv1_061097_AA0185080	ABD	1	1	1	0.728767	0.715544	0.834697	617	693	711	6	342	38	AT3G62900.1 | Symbols: | CW-type Zinc Finger | chr3:23248868-23254810 REVERSE LENGTH=1465	AT3G62900.1 | Symbols: | CW-type Zinc Finger | chr3:23248868-23254810 REVERSE LENGTH=1465	AT1G02990.1 | Symbols: | BEST Arabidopsis thaliana protein match is: CW-type Zinc Finger (TAIR:AT3G62900.1); Has 5847 Blast hits to 4410 proteins in 438 species: Archae - 17; Bacteria - 452; Metazoa - 2463; Fungi - 354; Plants - 306; Viruses - 11; Other Eukaryotes - 2244 (source: NCBI BLink). | chr1:683065-686884 REVERSE LENGTH=1069, AT1G02990.2 | Symbols: | BEST Arabidopsis thaliana protein matc…	LOC_Os05g30790.1 protein|CW-type Zinc Finger, putative, expressed	LOC_Os05g30790.1 protein|CW-type Zinc Finger, putative, expressed	LOC_Os05g30790.1 protein|CW-type Zinc Finger, putative, expressed
Homoeologous triplet 265	TRIAE_CS42_1AL_TGACv1_000602_AA0015540	TRIAE_CS42_1BL_TGACv1_033128_AA0137230	TRIAE_CS42_1DL_TGACv1_061540_AA0198320	ABD	1	1	1	0.79643	0.965637	0.846463	387	305	376	55	7	27	AT5G25510.1 | Symbols: | Protein phosphatase 2A regulatory B subunit family protein | chr5:8882728-8884325 REVERSE LENGTH=500	AT5G25510.1 | Symbols: | Protein phosphatase 2A regulatory B subunit family protein | chr5:8882728-8884325 REVERSE LENGTH=500	AT5G25510.1 | Symbols: | Protein phosphatase 2A regulatory B subunit family protein | chr5:8882728-8884325 REVERSE LENGTH=500	LOC_Os05g48150.1 protein|transposon protein, putative, unclassified, expressed, LOC_Os05g48150.2 protein|transposon protein, putative, unclassified, expressed	LOC_Os05g48150.1 protein|transposon protein, putative, unclassified, expressed, LOC_Os05g48150.2 protein|transposon protein, putative, unclassified, expressed	LOC_Os05g48150.1 protein|transposon protein, putative, unclassified, expressed, LOC_Os05g48150.2 protein|transposon protein, putative, unclassified, expressed
Homoeologous triplet 266	TRIAE_CS42_1AL_TGACv1_000606_AA0015560	TRIAE_CS42_1BL_TGACv1_030244_AA0083590	TRIAE_CS42_1DL_TGACv1_061300_AA0191760	BD-A	15	1	1	0.247178	0.212949	0.908337	80	726	724	632	625	0	AT1G65720.1 | Symbols: | unknown protein; FUNCTIONS IN: molecular_function unknown; INVOLVED IN: biological_process unknown; LOCATED IN: endomembrane system; EXPRESSED IN: 24 plant structures; EXPRESSED DURING: 15 growth stages; Has 44 Blast hits to 44 proteins in 14 species: Archae - 0; Bacteria - 0; Metazoa - 0; Fungi - 0; Plants - 44; Viruses - 0; Other Eukaryotes - 0 (source: NCBI BLink). | c…	AT1G65720.1 | Symbols: | unknown protein; FUNCTIONS IN: molecular_function unknown; INVOLVED IN: biological_process unknown; LOCATED IN: endomembrane system; EXPRESSED IN: 24 plant structures; EXPRESSED DURING: 15 growth stages; Has 44 Blast hits to 44 proteins in 14 species: Archae - 0; Bacteria - 0; Metazoa - 0; Fungi - 0; Plants - 44; Viruses - 0; Other Eukaryotes - 0 (source: NCBI BLink). | c…	AT1G65720.1 | Symbols: | unknown protein; FUNCTIONS IN: molecular_function unknown; INVOLVED IN: biological_process unknown; LOCATED IN: endomembrane system; EXPRESSED IN: 24 plant structures; EXPRESSED DURING: 15 growth stages; Has 44 Blast hits to 44 proteins in 14 species: Archae - 0; Bacteria - 0; Metazoa - 0; Fungi - 0; Plants - 44; Viruses - 0; Other Eukaryotes - 0 (source: NCBI BLink). | c…	LOC_Os10g34270.1 protein|expressed protein	LOC_Os10g34270.1 protein|expressed protein	LOC_Os10g34270.1 protein|expressed protein
Homoeologous triplet 267	TRIAE_CS42_1AL_TGACv1_000609_AA0015650	TRIAE_CS42_1BL_TGACv1_031814_AA0121060	TRIAE_CS42_1DL_TGACv1_063925_AA0231790	ABD	1	1	1	0.762962	0.74859	0.78706	513	318	150	47	171	16	AT1G61320.1 | Symbols: | FBD / Leucine Rich Repeat domains containing protein | chr1:22617370-22619718 FORWARD LENGTH=459	AT1G61320.1 | Symbols: | FBD / Leucine Rich Repeat domains containing protein | chr1:22617370-22619718 FORWARD LENGTH=459	AT1G61320.1 | Symbols: | FBD / Leucine Rich Repeat domains containing protein | chr1:22617370-22619718 FORWARD LENGTH=459	LOC_Os09g32580.1 protein|expressed protein	LOC_Os09g32580.1 protein|expressed protein	LOC_Os09g32580.1 protein|expressed protein
Homoeologous triplet 268	TRIAE_CS42_1AL_TGACv1_000612_AA0015790	TRIAE_CS42_1BL_TGACv1_031732_AA0119840	TRIAE_CS42_1DL_TGACv1_064251_AA0233520	ABD	1	1	1	0.784777	0.680514	0.737647	718	724	707	14	11	6	AT3G18170.1 | Symbols: | Glycosyltransferase family 61 protein | chr3:6228393-6229547 FORWARD LENGTH=384	AT3G18170.1 | Symbols: | Glycosyltransferase family 61 protein | chr3:6228393-6229547 FORWARD LENGTH=384	AT3G18170.1 | Symbols: | Glycosyltransferase family 61 protein | chr3:6228393-6229547 FORWARD LENGTH=384	LOC_Os02g22480.1 protein|glycosyltransferase, putative, expressed, LOC_Os02g22480.2 protein|glycosyltransferase, putative, expressed	LOC_Os02g22480.1 protein|glycosyltransferase, putative, expressed, LOC_Os02g22480.2 protein|glycosyltransferase, putative, expressed	LOC_Os02g22480.1 protein|glycosyltransferase, putative, expressed, LOC_Os02g22480.2 protein|glycosyltransferase, putative, expressed
Homoeologous triplet 269	TRIAE_CS42_1AL_TGACv1_000612_AA0015780	TRIAE_CS42_1BL_TGACv1_031732_AA0119850	TRIAE_CS42_1DL_TGACv1_061453_AA0195700	ABD	1	1	1	0.814331	0.88104	0.840121	116	155	48	1	1	3	AT1G16480.1 | Symbols: | Tetratricopeptide repeat (TPR)-like superfamily protein | chr1:5625843-5628656 REVERSE LENGTH=937, AT1G16480.2 | Symbols: | Tetratricopeptide repeat (TPR)-like superfamily protein | chr1:5625742-5628605 REVERSE LENGTH=928	AT4G13650.1 | Symbols: | Pentatricopeptide repeat (PPR) superfamily protein | chr4:7939611-7942898 REVERSE LENGTH=1064	AT4G13650.1 | Symbols: | Pentatricopeptide repeat (PPR) superfamily protein | chr4:7939611-7942898 REVERSE LENGTH=1064	LOC_Os05g45850.1 protein|expressed protein	LOC_Os05g45850.1 protein|expressed protein	LOC_Os05g45850.1 protein|expressed protein
Homoeologous triplet 270	TRIAE_CS42_1AL_TGACv1_000617_AA0015960	TRIAE_CS42_1BL_TGACv1_030506_AA0092680	TRIAE_CS42_1DL_TGACv1_063047_AA0223340	ABD	7	7	7	0.954642	0.931548	0.956705	104	128	124	12	8	5	AT5G11950.1 | Symbols: | Putative lysine decarboxylase family protein | chr5:3855072-3856815 FORWARD LENGTH=216, AT5G11950.2 | Symbols: | Putative lysine decarboxylase family protein | chr5:3855072-3856815 FORWARD LENGTH=216	AT5G11950.1 | Symbols: | Putative lysine decarboxylase family protein | chr5:3855072-3856815 FORWARD LENGTH=216, AT5G11950.2 | Symbols: | Putative lysine decarboxylase family protein | chr5:3855072-3856815 FORWARD LENGTH=216	AT5G11950.1 | Symbols: | Putative lysine decarboxylase family protein | chr5:3855072-3856815 FORWARD LENGTH=216, AT5G11950.2 | Symbols: | Putative lysine decarboxylase family protein | chr5:3855072-3856815 FORWARD LENGTH=216	LOC_Os05g46360.1 protein|possible lysine decarboxylase domain containing protein, expressed, LOC_Os05g46360.3 protein|possible lysine decarboxylase domain containing protein, expressed, LOC_Os05g46360.2 protein|possible lysine decarboxylase domain containing protein, expressed	LOC_Os05g46360.1 protein|possible lysine decarboxylase domain containing protein, expressed, LOC_Os05g46360.3 protein|possible lysine decarboxylase domain containing protein, expressed, LOC_Os05g46360.2 protein|possible lysine decarboxylase domain containing protein, expressed	LOC_Os05g46360.1 protein|possible lysine decarboxylase domain containing protein, expressed, LOC_Os05g46360.3 protein|possible lysine decarboxylase domain containing protein, expressed, LOC_Os05g46360.2 protein|possible lysine decarboxylase domain containing protein, expressed
Homoeologous triplet 271	TRIAE_CS42_1AL_TGACv1_000619_AA0015980	TRIAE_CS42_1BL_TGACv1_030757_AA0100060	TRIAE_CS42_1DL_TGACv1_061182_AA0188070	AD-B	5	9	5	0.742062	0.79517	0.870673	38	27	26	8	3	0	AT2G45590.1 | Symbols: | Protein kinase superfamily protein | chr2:18786725-18788776 FORWARD LENGTH=683	AT2G45590.1 | Symbols: | Protein kinase superfamily protein | chr2:18786725-18788776 FORWARD LENGTH=683	AT2G45590.1 | Symbols: | Protein kinase superfamily protein | chr2:18786725-18788776 FORWARD LENGTH=683	LOC_Os08g17320.1 protein|protein kinase family protein, putative, expressed	LOC_Os08g17320.1 protein|protein kinase family protein, putative, expressed	LOC_Os08g17320.1 protein|protein kinase family protein, putative, expressed
Homoeologous triplet 272	TRIAE_CS42_1AL_TGACv1_000622_AA0016130	TRIAE_CS42_1BL_TGACv1_033545_AA0140280	TRIAE_CS42_1DL_TGACv1_062431_AA0214390	AB-D	5	5	3	0.923591	0.646974	0.700559	19	14	38	1	19	20	AT2G26560.1 | Symbols: PLP2, PLA IIA, PLA2A | phospholipase A 2A | chr2:11293912-11295708 REVERSE LENGTH=407	AT2G26560.1 | Symbols: PLP2, PLA IIA, PLA2A | phospholipase A 2A | chr2:11293912-11295708 REVERSE LENGTH=407	AT2G26560.1 | Symbols: PLP2, PLA IIA, PLA2A | phospholipase A 2A | chr2:11293912-11295708 REVERSE LENGTH=407	LOC_Os11g39990.1 protein|patatin, putative, expressed	LOC_Os11g39990.1 protein|patatin, putative, expressed	LOC_Os11g39990.1 protein|patatin, putative, expressed
Homoeologous triplet 273	TRIAE_CS42_1AL_TGACv1_000625_AA0016150	TRIAE_CS42_1BL_TGACv1_032431_AA0129810	TRIAE_CS42_1DL_TGACv1_061968_AA0206620	ABD	2	2	2	0.907752	0.905553	0.878895	706	710	640	21	10	13	AT3G05350.1 | Symbols: | Metallopeptidase M24 family protein | chr3:1527103-1533843 REVERSE LENGTH=710	AT3G05350.1 | Symbols: | Metallopeptidase M24 family protein | chr3:1527103-1533843 REVERSE LENGTH=710	AT3G05350.1 | Symbols: | Metallopeptidase M24 family protein | chr3:1527103-1533843 REVERSE LENGTH=710	LOC_Os07g10540.2 protein|peptidase, M24 family protein, putative, expressed, LOC_Os07g10540.1 protein|peptidase, M24 family protein, putative, expressed	LOC_Os07g10540.2 protein|peptidase, M24 family protein, putative, expressed, LOC_Os07g10540.1 protein|peptidase, M24 family protein, putative, expressed	LOC_Os07g10540.2 protein|peptidase, M24 family protein, putative, expressed, LOC_Os07g10540.1 protein|peptidase, M24 family protein, putative, expressed
Homoeologous triplet 274	TRIAE_CS42_1AL_TGACv1_000627_AA0016190	TRIAE_CS42_1BL_TGACv1_032156_AA0126110	TRIAE_CS42_1DL_TGACv1_061338_AA0192540	A-B-D	1	4	5	0.747259	0.79339	0.756858	469	364	423	87	76	18	AT2G38760.1 | Symbols: ANNAT3, ANN3 | annexin 3 | chr2:16201086-16202490 FORWARD LENGTH=321	AT2G38760.1 | Symbols: ANNAT3, ANN3 | annexin 3 | chr2:16201086-16202490 FORWARD LENGTH=321	AT2G38760.1 | Symbols: ANNAT3, ANN3 | annexin 3 | chr2:16201086-16202490 FORWARD LENGTH=321	LOC_Os05g31760.1 protein|annexin, putative, expressed	LOC_Os05g31760.1 protein|annexin, putative, expressed	LOC_Os05g31760.1 protein|annexin, putative, expressed
Homoeologous triplet 275	TRIAE_CS42_1AL_TGACv1_000627_AA0016180	TRIAE_CS42_1BL_TGACv1_032156_AA0126100	TRIAE_CS42_1DL_TGACv1_061338_AA0192530	BD-A	8	1	1	0.818953	0.919897	0.789596	727	713	727	33	0	27	AT3G57090.1 | Symbols: BIGYIN, FIS1A | Tetratricopeptide repeat (TPR)-like superfamily protein | chr3:21128627-21129981 FORWARD LENGTH=170	AT3G57090.1 | Symbols: BIGYIN, FIS1A | Tetratricopeptide repeat (TPR)-like superfamily protein | chr3:21128627-21129981 FORWARD LENGTH=170	AT3G57090.1 | Symbols: BIGYIN, FIS1A | Tetratricopeptide repeat (TPR)-like superfamily protein | chr3:21128627-21129981 FORWARD LENGTH=170	LOC_Os05g31770.1 protein|tetratricopeptide repeat containing protein, putative, expressed	LOC_Os05g31770.1 protein|tetratricopeptide repeat containing protein, putative, expressed	LOC_Os05g31770.1 protein|tetratricopeptide repeat containing protein, putative, expressed
Homoeologous triplet 276	TRIAE_CS42_1AL_TGACv1_000633_AA0016240	TRIAE_CS42_1BL_TGACv1_030968_AA0104740	TRIAE_CS42_1DL_TGACv1_063205_AA0224940	BD-A	7	1	1	0.784493	0.829731	0.936193	162	191	206	26	11	13	AT2G28660.1 | Symbols: | Chloroplast-targeted copper chaperone protein | chr2:12295419-12296944 FORWARD LENGTH=265	AT2G28660.1 | Symbols: | Chloroplast-targeted copper chaperone protein | chr2:12295419-12296944 FORWARD LENGTH=265	AT2G28660.1 | Symbols: | Chloroplast-targeted copper chaperone protein | chr2:12295419-12296944 FORWARD LENGTH=265	LOC_Os08g31340.1 protein|heavy metal-associated domain containing protein, expressed	LOC_Os08g31340.1 protein|heavy metal-associated domain containing protein, expressed	LOC_Os08g31340.1 protein|heavy metal-associated domain containing protein, expressed
Homoeologous triplet 277	TRIAE_CS42_1AL_TGACv1_000639_AA0016350	TRIAE_CS42_1BL_TGACv1_030373_AA0088440	TRIAE_CS42_1DL_TGACv1_061728_AA0202530	A-B-D	1	4	16	0.865948	0.870721	0.664309	37	123	10	41	27	115	AT1G30840.1 | Symbols: ATPUP4, PUP4 | purine permease 4 | chr1:10974581-10975729 FORWARD LENGTH=382, AT1G30840.2 | Symbols: PUP4 | purine permease 4 | chr1:10974581-10975729 FORWARD LENGTH=382	AT1G30840.1 | Symbols: ATPUP4, PUP4 | purine permease 4 | chr1:10974581-10975729 FORWARD LENGTH=382, AT1G30840.2 | Symbols: PUP4 | purine permease 4 | chr1:10974581-10975729 FORWARD LENGTH=382	AT1G30840.1 | Symbols: ATPUP4, PUP4 | purine permease 4 | chr1:10974581-10975729 FORWARD LENGTH=382, AT1G30840.2 | Symbols: PUP4 | purine permease 4 | chr1:10974581-10975729 FORWARD LENGTH=382	LOC_Os05g48300.1 protein|purine permease, putative, expressed	LOC_Os05g48300.1 protein|purine permease, putative, expressed	LOC_Os05g48300.1 protein|purine permease, putative, expressed
Homoeologous triplet 278	TRIAE_CS42_1AL_TGACv1_000639_AA0016320	TRIAE_CS42_1BL_TGACv1_030373_AA0088470	TRIAE_CS42_1DL_TGACv1_061728_AA0202580	A-B-D	4	1	12	0.857059	0.557704	0.712167	126	10	67	77	78	26	AT1G30840.1 | Symbols: ATPUP4, PUP4 | purine permease 4 | chr1:10974581-10975729 FORWARD LENGTH=382, AT1G30840.2 | Symbols: PUP4 | purine permease 4 | chr1:10974581-10975729 FORWARD LENGTH=382	AT1G30840.1 | Symbols: ATPUP4, PUP4 | purine permease 4 | chr1:10974581-10975729 FORWARD LENGTH=382, AT1G30840.2 | Symbols: PUP4 | purine permease 4 | chr1:10974581-10975729 FORWARD LENGTH=382	AT1G30840.1 | Symbols: ATPUP4, PUP4 | purine permease 4 | chr1:10974581-10975729 FORWARD LENGTH=382, AT1G30840.2 | Symbols: PUP4 | purine permease 4 | chr1:10974581-10975729 FORWARD LENGTH=382	LOC_Os05g48300.1 protein|purine permease, putative, expressed	LOC_Os05g48300.1 protein|purine permease, putative, expressed	LOC_Os05g48300.1 protein|purine permease, putative, expressed
Homoeologous triplet 279	TRIAE_CS42_1AL_TGACv1_000644_AA0016380	TRIAE_CS42_1BL_TGACv1_032241_AA0127300	TRIAE_CS42_1DL_TGACv1_063151_AA0224440	ABD	1	1	1	0.791568	0.835661	0.707624	16	18	12	5	2	10	AT4G38900.1 | Symbols: | Basic-leucine zipper (bZIP) transcription factor family protein | chr4:18139564-18141520 REVERSE LENGTH=553, AT4G38900.2 | Symbols: | Basic-leucine zipper (bZIP) transcription factor family protein | chr4:18139564-18141520 REVERSE LENGTH=547, AT4G38900.3 | Symbols: | Basic-leucine zipper (bZIP) transcription factor family protein | chr4:18139564-18141520 REVERSE LENGTH=547	AT4G38900.1 | Symbols: | Basic-leucine zipper (bZIP) transcription factor family protein | chr4:18139564-18141520 REVERSE LENGTH=553, AT4G38900.2 | Symbols: | Basic-leucine zipper (bZIP) transcription factor family protein | chr4:18139564-18141520 REVERSE LENGTH=547, AT4G38900.3 | Symbols: | Basic-leucine zipper (bZIP) transcription factor family protein | chr4:18139564-18141520 REVERSE LENGTH=547	AT4G38900.1 | Symbols: | Basic-leucine zipper (bZIP) transcription factor family protein | chr4:18139564-18141520 REVERSE LENGTH=553, AT4G38900.2 | Symbols: | Basic-leucine zipper (bZIP) transcription factor family protein | chr4:18139564-18141520 REVERSE LENGTH=547, AT4G38900.3 | Symbols: | Basic-leucine zipper (bZIP) transcription factor family protein | chr4:18139564-18141520 REVERSE LENGTH=547	LOC_Os10g38820.1 protein|bZIP family transcription factor, putative, expressed	LOC_Os10g38820.1 protein|bZIP family transcription factor, putative, expressed	LOC_Os10g38820.1 protein|bZIP family transcription factor, putative, expressed
Homoeologous triplet 280	TRIAE_CS42_1AL_TGACv1_000659_AA0016580	TRIAE_CS42_1BL_TGACv1_031708_AA0119360	TRIAE_CS42_1DL_TGACv1_061729_AA0202610	ABD	2	2	2	0.720418	0.773976	0.850023	177	79	140	64	58	53	AT5G07990.1 | Symbols: TT7, CYP75B1, D501 | Cytochrome P450 superfamily protein | chr5:2560437-2562859 FORWARD LENGTH=513	AT5G07990.1 | Symbols: TT7, CYP75B1, D501 | Cytochrome P450 superfamily protein | chr5:2560437-2562859 FORWARD LENGTH=513	AT5G07990.1 | Symbols: TT7, CYP75B1, D501 | Cytochrome P450 superfamily protein | chr5:2560437-2562859 FORWARD LENGTH=513	LOC_Os10g17260.1 protein|cytochrome P450, putative, expressed	LOC_Os10g17260.1 protein|cytochrome P450, putative, expressed	LOC_Os10g17260.1 protein|cytochrome P450, putative, expressed
Homoeologous triplet 281	TRIAE_CS42_1AL_TGACv1_000661_AA0016590	TRIAE_CS42_1BL_TGACv1_030589_AA0094880	TRIAE_CS42_1DL_TGACv1_064039_AA0232220	ABD	4	4	4	0.91721	0.935702	0.938797	438	425	426	9	3	4	AT3G10760.1 | Symbols: | Homeodomain-like superfamily protein | chr3:3369814-3370821 FORWARD LENGTH=335	AT3G10760.1 | Symbols: | Homeodomain-like superfamily protein | chr3:3369814-3370821 FORWARD LENGTH=335	AT3G10760.1 | Symbols: | Homeodomain-like superfamily protein | chr3:3369814-3370821 FORWARD LENGTH=335	LOC_Os05g34110.1 protein|homeodomain-related, putative, expressed	LOC_Os05g34110.1 protein|homeodomain-related, putative, expressed	LOC_Os05g34110.1 protein|homeodomain-related, putative, expressed
Homoeologous triplet 282	TRIAE_CS42_1AL_TGACv1_000667_AA0016650	TRIAE_CS42_1BL_TGACv1_032180_AA0126400	TRIAE_CS42_1DL_TGACv1_063601_AA0228970	ABD	6	6	6	0.769526	0.9043	0.78046	703	659	678	56	2	42	AT2G47490.1 | Symbols: ATNDT1, NDT1 | NAD+ transporter 1 | chr2:19487549-19489311 FORWARD LENGTH=312	AT2G47490.1 | Symbols: ATNDT1, NDT1 | NAD+ transporter 1 | chr2:19487549-19489311 FORWARD LENGTH=312	AT2G47490.1 | Symbols: ATNDT1, NDT1 | NAD+ transporter 1 | chr2:19487549-19489311 FORWARD LENGTH=312	LOC_Os05g28870.1 protein|mitochondrial carrier protein, putative, expressed	LOC_Os05g28870.1 protein|mitochondrial carrier protein, putative, expressed	LOC_Os05g28870.1 protein|mitochondrial carrier protein, putative, expressed
Homoeologous triplet 283	TRIAE_CS42_1AL_TGACv1_000667_AA0016620	TRIAE_CS42_1BL_TGACv1_033066_AA0136620	TRIAE_CS42_1DL_TGACv1_062442_AA0214550	ABD	1	1	1	0.837194	0.83102	0.852582	675	701	699	0	0	2	AT1G56310.1 | Symbols: | Polynucleotidyl transferase, ribonuclease H-like superfamily protein | chr1:21082863-21085564 FORWARD LENGTH=589	AT1G56310.1 | Symbols: | Polynucleotidyl transferase, ribonuclease H-like superfamily protein | chr1:21082863-21085564 FORWARD LENGTH=589	AT1G56310.1 | Symbols: | Polynucleotidyl transferase, ribonuclease H-like superfamily protein | chr1:21082863-21085564 FORWARD LENGTH=589	LOC_Os05g28860.2 protein|3'-5' exonuclease, putative, expressed, LOC_Os05g28860.1 protein|3'-5' exonuclease, putative, expressed	LOC_Os05g28860.2 protein|3'-5' exonuclease, putative, expressed, LOC_Os05g28860.1 protein|3'-5' exonuclease, putative, expressed	LOC_Os05g28860.2 protein|3'-5' exonuclease, putative, expressed, LOC_Os05g28860.1 protein|3'-5' exonuclease, putative, expressed
Homoeologous triplet 284	TRIAE_CS42_1AL_TGACv1_000669_AA0016760	TRIAE_CS42_1BL_TGACv1_031862_AA0121890	TRIAE_CS42_1DL_TGACv1_062654_AA0217860	BD-A	4	5	5	0.925697	0.942727	0.93196	416	454	470	0	0	0	AT4G00150.1 | Symbols: HAM3, ATHAM3, LOM3 | GRAS family transcription factor | chr4:57429-59105 REVERSE LENGTH=558	AT4G00150.1 | Symbols: HAM3, ATHAM3, LOM3 | GRAS family transcription factor | chr4:57429-59105 REVERSE LENGTH=558	AT4G00150.1 | Symbols: HAM3, ATHAM3, LOM3 | GRAS family transcription factor | chr4:57429-59105 REVERSE LENGTH=558	LOC_Os10g40390.1 protein|scarecrow, putative, expressed	LOC_Os10g40390.1 protein|scarecrow, putative, expressed	LOC_Os10g40390.1 protein|scarecrow, putative, expressed
Homoeologous triplet 285	TRIAE_CS42_1AL_TGACv1_000671_AA0016800	TRIAE_CS42_1BL_TGACv1_032323_AA0128380	TRIAE_CS42_1DL_TGACv1_062483_AA0215060	ABD	1	1	1	0.92899	0.890639	0.917408	665	616	553	2	23	4	AT3G26050.1 | Symbols: | TPX2 (targeting protein for Xklp2) protein family | chr3:9521907-9524241 FORWARD LENGTH=533	AT3G26050.1 | Symbols: | TPX2 (targeting protein for Xklp2) protein family | chr3:9521907-9524241 FORWARD LENGTH=533	AT3G26050.1 | Symbols: | TPX2 (targeting protein for Xklp2) protein family | chr3:9521907-9524241 FORWARD LENGTH=533	LOC_Os05g34760.2 protein|expressed protein, LOC_Os05g34760.1 protein|expressed protein	LOC_Os05g34760.2 protein|expressed protein, LOC_Os05g34760.1 protein|expressed protein	LOC_Os05g34760.2 protein|expressed protein, LOC_Os05g34760.1 protein|expressed protein
Homoeologous triplet 286	TRIAE_CS42_1AL_TGACv1_000671_AA0016780	TRIAE_CS42_1BL_TGACv1_032323_AA0128360	TRIAE_CS42_1DL_TGACv1_062483_AA0215080	AB-D	2	2	15	0.965158	0.96944	0.981016	655	611	627	7	1	3	AT1G33780.1 | Symbols: | Protein of unknown function (DUF179) | chr1:12244799-12246034 REVERSE LENGTH=325	AT1G33780.1 | Symbols: | Protein of unknown function (DUF179) | chr1:12244799-12246034 REVERSE LENGTH=325	AT1G33780.1 | Symbols: | Protein of unknown function (DUF179) | chr1:12244799-12246034 REVERSE LENGTH=325	LOC_Os05g34720.1 protein|transcriptional regulator, putative, expressed	LOC_Os05g34720.1 protein|transcriptional regulator, putative, expressed	LOC_Os05g34720.1 protein|transcriptional regulator, putative, expressed
Homoeologous triplet 287	TRIAE_CS42_1AL_TGACv1_000671_AA0016810	TRIAE_CS42_1BL_TGACv1_032323_AA0128400	TRIAE_CS42_1DL_TGACv1_062483_AA0215050	AB-D	3	3	1	0.964839	0.911414	0.894933	727	727	727	0	1	2	AT1G22840.1 | Symbols: CYTC-1, ATCYTC-A | CYTOCHROME C-1 | chr1:8079384-8080286 FORWARD LENGTH=114, AT1G22840.2 | Symbols: CYTC-1, ATCYTC-A | CYTOCHROME C-1 | chr1:8079384-8080246 FORWARD LENGTH=102	AT1G22840.1 | Symbols: CYTC-1, ATCYTC-A | CYTOCHROME C-1 | chr1:8079384-8080286 FORWARD LENGTH=114, AT1G22840.2 | Symbols: CYTC-1, ATCYTC-A | CYTOCHROME C-1 | chr1:8079384-8080246 FORWARD LENGTH=102	AT1G22840.1 | Symbols: CYTC-1, ATCYTC-A | CYTOCHROME C-1 | chr1:8079384-8080286 FORWARD LENGTH=114, AT1G22840.2 | Symbols: CYTC-1, ATCYTC-A | CYTOCHROME C-1 | chr1:8079384-8080246 FORWARD LENGTH=102	LOC_Os05g34770.1 protein|cytochrome c, putative, expressed	LOC_Os05g34770.1 protein|cytochrome c, putative, expressed	LOC_Os05g34770.1 protein|cytochrome c, putative, expressed
Homoeologous triplet 288	TRIAE_CS42_1AL_TGACv1_000676_AA0016850	TRIAE_CS42_1BL_TGACv1_032281_AA0127850	TRIAE_CS42_1DL_TGACv1_061780_AA0203350	ABD	2	2	2	0.894911	0.936931	0.915109	678	717	710	14	13	9	AT4G32770.1 | Symbols: VTE1, ATSDX1 | tocopherol cyclase, chloroplast / vitamin E deficient 1 (VTE1) / sucrose export defective 1 (SXD1) | chr4:15804981-15807790 FORWARD LENGTH=488	AT4G32770.1 | Symbols: VTE1, ATSDX1 | tocopherol cyclase, chloroplast / vitamin E deficient 1 (VTE1) / sucrose export defective 1 (SXD1) | chr4:15804981-15807790 FORWARD LENGTH=488	AT4G32770.1 | Symbols: VTE1, ATSDX1 | tocopherol cyclase, chloroplast / vitamin E deficient 1 (VTE1) / sucrose export defective 1 (SXD1) | chr4:15804981-15807790 FORWARD LENGTH=488	LOC_Os02g17650.2 protein|tocopherol cyclase, chloroplast precursor, putative, expressed, LOC_Os02g17650.1 protein|tocopherol cyclase, chloroplast precursor, putative, expressed	LOC_Os02g17650.2 protein|tocopherol cyclase, chloroplast precursor, putative, expressed, LOC_Os02g17650.1 protein|tocopherol cyclase, chloroplast precursor, putative, expressed	LOC_Os02g17650.2 protein|tocopherol cyclase, chloroplast precursor, putative, expressed, LOC_Os02g17650.1 protein|tocopherol cyclase, chloroplast precursor, putative, expressed
Homoeologous triplet 289	TRIAE_CS42_1AL_TGACv1_000676_AA0016870	TRIAE_CS42_1BL_TGACv1_032281_AA0127860	TRIAE_CS42_1DL_TGACv1_061780_AA0203360	ABD	1	1	1	0.801507	0.822651	0.780881	373	314	390	5	0	5	AT5G58575.1 | Symbols: | CONTAINS InterPro DOMAIN/s: Sgf11, transcriptional regulation (InterPro:IPR013246); Has 30201 Blast hits to 17322 proteins in 780 species: Archae - 12; Bacteria - 1396; Metazoa - 17338; Fungi - 3422; Plants - 5037; Viruses - 0; Other Eukaryotes - 2996 (source: NCBI BLink). | chr5:23674399-23675224 FORWARD LENGTH=181	AT5G58575.1 | Symbols: | CONTAINS InterPro DOMAIN/s: Sgf11, transcriptional regulation (InterPro:IPR013246); Has 30201 Blast hits to 17322 proteins in 780 species: Archae - 12; Bacteria - 1396; Metazoa - 17338; Fungi - 3422; Plants - 5037; Viruses - 0; Other Eukaryotes - 2996 (source: NCBI BLink). | chr5:23674399-23675224 FORWARD LENGTH=181	AT5G58575.1 | Symbols: | CONTAINS InterPro DOMAIN/s: Sgf11, transcriptional regulation (InterPro:IPR013246); Has 30201 Blast hits to 17322 proteins in 780 species: Archae - 12; Bacteria - 1396; Metazoa - 17338; Fungi - 3422; Plants - 5037; Viruses - 0; Other Eukaryotes - 2996 (source: NCBI BLink). | chr5:23674399-23675224 FORWARD LENGTH=181	LOC_Os05g28370.2 protein|expressed protein, LOC_Os05g28370.1 protein|expressed protein	LOC_Os05g28370.2 protein|expressed protein, LOC_Os05g28370.1 protein|expressed protein	LOC_Os05g28370.2 protein|expressed protein, LOC_Os05g28370.1 protein|expressed protein
Homoeologous triplet 290	TRIAE_CS42_1AL_TGACv1_000680_AA0016910	TRIAE_CS42_1BL_TGACv1_032060_AA0124890	TRIAE_CS42_1DL_TGACv1_061111_AA0185760	AD-B	1	8	1	0.924868	0.978076	0.94016	622	629	627	0	1	0	AT4G25730.1 | Symbols: | FtsJ-like methyltransferase family protein | chr4:13102906-13106718 REVERSE LENGTH=821	AT4G25730.1 | Symbols: | FtsJ-like methyltransferase family protein | chr4:13102906-13106718 REVERSE LENGTH=821	AT4G25730.1 | Symbols: | FtsJ-like methyltransferase family protein | chr4:13102906-13106718 REVERSE LENGTH=821	LOC_Os05g49230.1 protein|ribosomal RNA large subunit methyltransferase J, putative, expressed	LOC_Os05g49230.1 protein|ribosomal RNA large subunit methyltransferase J, putative, expressed	LOC_Os05g49230.1 protein|ribosomal RNA large subunit methyltransferase J, putative, expressed
Homoeologous triplet 291	TRIAE_CS42_1AL_TGACv1_000680_AA0016900	TRIAE_CS42_1BL_TGACv1_032060_AA0124900	TRIAE_CS42_1DL_TGACv1_061111_AA0185750	ABD	7	7	7	0.952613	0.941668	0.987143	338	507	425	25	1	13	AT5G66470.1 | Symbols: | RNA binding;GTP binding | chr5:26541986-26544302 REVERSE LENGTH=427	AT5G66470.1 | Symbols: | RNA binding;GTP binding | chr5:26541986-26544302 REVERSE LENGTH=427	AT5G66470.1 | Symbols: | RNA binding;GTP binding | chr5:26541986-26544302 REVERSE LENGTH=427	LOC_Os05g49220.2 protein|GTP-binding protein, putative, expressed, LOC_Os05g49220.1 protein|GTP-binding protein, putative, expressed	LOC_Os05g49220.2 protein|GTP-binding protein, putative, expressed, LOC_Os05g49220.1 protein|GTP-binding protein, putative, expressed	LOC_Os05g49220.2 protein|GTP-binding protein, putative, expressed, LOC_Os05g49220.1 protein|GTP-binding protein, putative, expressed
Homoeologous triplet 292	TRIAE_CS42_1AL_TGACv1_000684_AA0016970	TRIAE_CS42_1BL_TGACv1_033824_AA0142160	TRIAE_CS42_1DL_TGACv1_064488_AA0234640	BD-A	8	1	1	0.906733	0.942494	0.91271	727	727	727	4	0	35	AT4G12610.1 | Symbols: RAP74, ATRAP74 | transcription activators;DNA binding;RNA polymerase II transcription factors;catalytics;transcription initiation factors | chr4:7455565-7457465 FORWARD LENGTH=400, AT4G12610.2 | Symbols: RAP74, ATRAP74 | transcription activators;DNA binding;RNA polymerase II transcription factors;catalytics;transcription initiation factors | chr4:7455565-7458318 FORWARD LEN…	AT4G12610.1 | Symbols: RAP74, ATRAP74 | transcription activators;DNA binding;RNA polymerase II transcription factors;catalytics;transcription initiation factors | chr4:7455565-7457465 FORWARD LENGTH=400, AT4G12610.2 | Symbols: RAP74, ATRAP74 | transcription activators;DNA binding;RNA polymerase II transcription factors;catalytics;transcription initiation factors | chr4:7455565-7458318 FORWARD LEN…	AT4G12610.1 | Symbols: RAP74, ATRAP74 | transcription activators;DNA binding;RNA polymerase II transcription factors;catalytics;transcription initiation factors | chr4:7455565-7457465 FORWARD LENGTH=400, AT4G12610.2 | Symbols: RAP74, ATRAP74 | transcription activators;DNA binding;RNA polymerase II transcription factors;catalytics;transcription initiation factors | chr4:7455565-7458318 FORWARD LEN…	LOC_Os10g10990.2 protein|transcription initiation factor IIF, alpha subunit domain containing protein, expressed, LOC_Os10g10990.1 protein|transcription initiation factor IIF, alpha subunit domain containing protein, expressed, LOC_Os10g10990.3 protein|transcription initiation factor IIF, alpha subunit domain containing protein, expressed	LOC_Os10g10990.2 protein|transcription initiation factor IIF, alpha subunit domain containing protein, expressed, LOC_Os10g10990.1 protein|transcription initiation factor IIF, alpha subunit domain containing protein, expressed, LOC_Os10g10990.3 protein|transcription initiation factor IIF, alpha subunit domain containing protein, expressed	LOC_Os10g10990.2 protein|transcription initiation factor IIF, alpha subunit domain containing protein, expressed, LOC_Os10g10990.1 protein|transcription initiation factor IIF, alpha subunit domain containing protein, expressed, LOC_Os10g10990.3 protein|transcription initiation factor IIF, alpha subunit domain containing protein, expressed
Homoeologous triplet 293	TRIAE_CS42_1AL_TGACv1_000685_AA0017000	TRIAE_CS42_1BL_TGACv1_033890_AA0142590	TRIAE_CS42_1DL_TGACv1_063015_AA0223020	AB-D	12	12	11	0.946714	0.946857	0.961882	618	654	599	2	4	3	AT2G38610.1 | Symbols: | RNA-binding KH domain-containing protein | chr2:16147552-16149638 REVERSE LENGTH=286, AT2G38610.2 | Symbols: | RNA-binding KH domain-containing protein | chr2:16147552-16149638 REVERSE LENGTH=286	AT2G38610.1 | Symbols: | RNA-binding KH domain-containing protein | chr2:16147552-16149638 REVERSE LENGTH=286, AT2G38610.2 | Symbols: | RNA-binding KH domain-containing protein | chr2:16147552-16149638 REVERSE LENGTH=286	AT2G38610.1 | Symbols: | RNA-binding KH domain-containing protein | chr2:16147552-16149638 REVERSE LENGTH=286, AT2G38610.2 | Symbols: | RNA-binding KH domain-containing protein | chr2:16147552-16149638 REVERSE LENGTH=286	LOC_Os05g40290.1 protein|KH domain-containing protein, putative, expressed, LOC_Os05g40290.2 protein|KH domain-containing protein, putative, expressed, LOC_Os05g40290.3 protein|KH domain-containing protein, putative, expressed	LOC_Os05g40290.1 protein|KH domain-containing protein, putative, expressed, LOC_Os05g40290.2 protein|KH domain-containing protein, putative, expressed, LOC_Os05g40290.3 protein|KH domain-containing protein, putative, expressed	LOC_Os05g40290.1 protein|KH domain-containing protein, putative, expressed, LOC_Os05g40290.2 protein|KH domain-containing protein, putative, expressed, LOC_Os05g40290.3 protein|KH domain-containing protein, putative, expressed
Homoeologous triplet 294	TRIAE_CS42_1AL_TGACv1_000687_AA0017060	TRIAE_CS42_1BL_TGACv1_030267_AA0084620	TRIAE_CS42_1DL_TGACv1_061870_AA0204980	ABD	4	4	4	0.988915	0.982802	0.991096	68	68	60	0	0	0	AT5G64620.1 | Symbols: C/VIF2, ATC/VIF2 | cell wall / vacuolar inhibitor of fructosidase 2 | chr5:25831875-25832417 FORWARD LENGTH=180	AT1G47960.1 | Symbols: C/VIF1, ATC/VIF1 | cell wall / vacuolar inhibitor of fructosidase 1 | chr1:17681954-17683516 REVERSE LENGTH=205	AT5G64620.1 | Symbols: C/VIF2, ATC/VIF2 | cell wall / vacuolar inhibitor of fructosidase 2 | chr5:25831875-25832417 FORWARD LENGTH=180	LOC_Os01g20970.1 protein|invertase/pectin methylesterase inhibitor family protein, putative, expressed	LOC_Os01g20970.1 protein|invertase/pectin methylesterase inhibitor family protein, putative, expressed	LOC_Os01g20970.1 protein|invertase/pectin methylesterase inhibitor family protein, putative, expressed
Homoeologous triplet 295	TRIAE_CS42_1AL_TGACv1_000691_AA0017120	TRIAE_CS42_1BL_TGACv1_031205_AA0109600	TRIAE_CS42_1DL_TGACv1_061378_AA0193570	ABD	1	1	1	0.942697	0.952168	0.96344	726	723	727	0	0	0	AT5G12430.1 | Symbols: TPR16 | Heat shock protein DnaJ with tetratricopeptide repeat | chr5:4028475-4034086 REVERSE LENGTH=1165	AT2G41520.1 | Symbols: TPR15 | Heat shock protein DnaJ with tetratricopeptide repeat | chr2:17317662-17322705 FORWARD LENGTH=1108, AT2G41520.2 | Symbols: TPR15 | Heat shock protein DnaJ with tetratricopeptide repeat | chr2:17317662-17322705 FORWARD LENGTH=1077	AT2G41520.1 | Symbols: TPR15 | Heat shock protein DnaJ with tetratricopeptide repeat | chr2:17317662-17322705 FORWARD LENGTH=1108, AT2G41520.2 | Symbols: TPR15 | Heat shock protein DnaJ with tetratricopeptide repeat | chr2:17317662-17322705 FORWARD LENGTH=1077	LOC_Os05g31056.1 protein|tetratricopeptide repeat containing protein, putative, expressed	LOC_Os05g31056.1 protein|tetratricopeptide repeat containing protein, putative, expressed	LOC_Os05g31056.1 protein|tetratricopeptide repeat containing protein, putative, expressed
Homoeologous triplet 296	TRIAE_CS42_1AL_TGACv1_000695_AA0017180	TRIAE_CS42_1BL_TGACv1_033227_AA0137910	TRIAE_CS42_1DL_TGACv1_064250_AA0233510	BD-A	6	2	2	0.960404	0.949729	0.963058	625	589	577	4	19	8	AT1G04620.1 | Symbols: | coenzyme F420 hydrogenase family / dehydrogenase, beta subunit family | chr1:1282869-1286492 REVERSE LENGTH=462	AT1G04620.1 | Symbols: | coenzyme F420 hydrogenase family / dehydrogenase, beta subunit family | chr1:1282869-1286492 REVERSE LENGTH=462	AT1G04620.1 | Symbols: | coenzyme F420 hydrogenase family / dehydrogenase, beta subunit family | chr1:1282869-1286492 REVERSE LENGTH=462	LOC_Os04g25400.2 protein|uncharacterized protein all1601, putative, expressed	LOC_Os04g25400.2 protein|uncharacterized protein all1601, putative, expressed	LOC_Os04g25400.2 protein|uncharacterized protein all1601, putative, expressed
Homoeologous triplet 297	TRIAE_CS42_1AL_TGACv1_000696_AA0017240	TRIAE_CS42_1BL_TGACv1_031558_AA0116090	TRIAE_CS42_1DL_TGACv1_061688_AA0201710	A-B-D	2	0	1	0.738752	0.790492	0.819422	265	141	194	29	9	11	AT2G46150.1 | Symbols: | Late embryogenesis abundant (LEA) hydroxyproline-rich glycoprotein family | chr2:18961424-18962089 FORWARD LENGTH=221	AT2G46150.1 | Symbols: | Late embryogenesis abundant (LEA) hydroxyproline-rich glycoprotein family | chr2:18961424-18962089 FORWARD LENGTH=221	AT2G46150.1 | Symbols: | Late embryogenesis abundant (LEA) hydroxyproline-rich glycoprotein family | chr2:18961424-18962089 FORWARD LENGTH=221	LOC_Os05g50720.1 protein|harpin-induced protein 1 domain containing protein, expressed	LOC_Os05g50720.1 protein|harpin-induced protein 1 domain containing protein, expressed	LOC_Os05g50720.1 protein|harpin-induced protein 1 domain containing protein, expressed
Homoeologous triplet 298	TRIAE_CS42_1AL_TGACv1_000697_AA0017310	TRIAE_CS42_1BL_TGACv1_030314_AA0086380	TRIAE_CS42_1DL_TGACv1_063751_AA0230570	ABD	1	1	1	0.781625	0.782382	0.841599	200	426	207	48	4	27	AT4G27510.1 | Symbols: | unknown protein; Has 25 Blast hits to 23 proteins in 8 species: Archae - 0; Bacteria - 0; Metazoa - 0; Fungi - 0; Plants - 25; Viruses - 0; Other Eukaryotes - 0 (source: NCBI BLink). | chr4:13746284-13748996 REVERSE LENGTH=728, AT4G27510.2 | Symbols: | unknown protein; FUNCTIONS IN: molecular_function unknown; INVOLVED IN: biological_process unknown; EXPRESSED IN: 22 plan…	AT4G27510.1 | Symbols: | unknown protein; Has 25 Blast hits to 23 proteins in 8 species: Archae - 0; Bacteria - 0; Metazoa - 0; Fungi - 0; Plants - 25; Viruses - 0; Other Eukaryotes - 0 (source: NCBI BLink). | chr4:13746284-13748996 REVERSE LENGTH=728, AT4G27510.2 | Symbols: | unknown protein; FUNCTIONS IN: molecular_function unknown; INVOLVED IN: biological_process unknown; EXPRESSED IN: 22 plan…	AT4G27510.1 | Symbols: | unknown protein; Has 25 Blast hits to 23 proteins in 8 species: Archae - 0; Bacteria - 0; Metazoa - 0; Fungi - 0; Plants - 25; Viruses - 0; Other Eukaryotes - 0 (source: NCBI BLink). | chr4:13746284-13748996 REVERSE LENGTH=728, AT4G27510.2 | Symbols: | unknown protein; FUNCTIONS IN: molecular_function unknown; INVOLVED IN: biological_process unknown; EXPRESSED IN: 22 plan…	LOC_Os02g26300.1 protein|expressed protein	LOC_Os02g26300.1 protein|expressed protein	LOC_Os02g26300.1 protein|expressed protein
Homoeologous triplet 299	TRIAE_CS42_1AL_TGACv1_000702_AA0017330	TRIAE_CS42_1BL_TGACv1_030617_AA0095880	TRIAE_CS42_1DL_TGACv1_061607_AA0199860	ABD	1	1	1	0.495037	0.764832	0.60055	428	13	159	396	243	96	AT3G13690.1 | Symbols: | Protein kinase protein with adenine nucleotide alpha hydrolases-like domain | chr3:4486920-4490011 FORWARD LENGTH=753	AT3G13690.1 | Symbols: | Protein kinase protein with adenine nucleotide alpha hydrolases-like domain | chr3:4486920-4490011 FORWARD LENGTH=753	AT3G13690.1 | Symbols: | Protein kinase protein with adenine nucleotide alpha hydrolases-like domain | chr3:4486920-4490011 FORWARD LENGTH=753	LOC_Os01g41870.1 protein|protein kinase, putative, expressed, LOC_Os01g41870.2 protein|protein kinase, putative, expressed	LOC_Os01g41870.1 protein|protein kinase, putative, expressed, LOC_Os01g41870.2 protein|protein kinase, putative, expressed	LOC_Os01g41870.1 protein|protein kinase, putative, expressed, LOC_Os01g41870.2 protein|protein kinase, putative, expressed
Homoeologous triplet 300	TRIAE_CS42_1AL_TGACv1_000704_AA0017370	TRIAE_CS42_1BL_TGACv1_034803_AA0145610	TRIAE_CS42_1DL_TGACv1_062718_AA0218660	ABD	6	6	6	0.972298	0.955267	0.951429	586	600	589	1	3	4	AT2G30100.1 | Symbols: | pentatricopeptide (PPR) repeat-containing protein | chr2:12847828-12849520 FORWARD LENGTH=503	AT2G30100.1 | Symbols: | pentatricopeptide (PPR) repeat-containing protein | chr2:12847828-12849520 FORWARD LENGTH=503	AT2G30100.1 | Symbols: | pentatricopeptide (PPR) repeat-containing protein | chr2:12847828-12849520 FORWARD LENGTH=503	LOC_Os05g28500.1 protein|ubiquitin family protein, putative, expressed	LOC_Os05g28500.1 protein|ubiquitin family protein, putative, expressed	LOC_Os05g28500.1 protein|ubiquitin family protein, putative, expressed
Homoeologous triplet 301	TRIAE_CS42_1AL_TGACv1_000708_AA0017500	TRIAE_CS42_1BL_TGACv1_032701_AA0133060	TRIAE_CS42_1DL_TGACv1_063665_AA0229570	BD-A	8	1	1	0.693126	0.592799	0.854329	414	708	676	393	340	7	AT1G15780.1 | Symbols: | unknown protein; BEST Arabidopsis thaliana protein match is: unknown protein (TAIR:AT2G10440.1); Has 103701 Blast hits to 43153 proteins in 1828 species: Archae - 30; Bacteria - 7385; Metazoa - 38639; Fungi - 11531; Plants - 7727; Viruses - 307; Other Eukaryotes - 38082 (source: NCBI BLink). | chr1:5430446-5435921 REVERSE LENGTH=1335	AT1G15780.1 | Symbols: | unknown protein; BEST Arabidopsis thaliana protein match is: unknown protein (TAIR:AT2G10440.1); Has 103701 Blast hits to 43153 proteins in 1828 species: Archae - 30; Bacteria - 7385; Metazoa - 38639; Fungi - 11531; Plants - 7727; Viruses - 307; Other Eukaryotes - 38082 (source: NCBI BLink). | chr1:5430446-5435921 REVERSE LENGTH=1335	AT1G15780.1 | Symbols: | unknown protein; BEST Arabidopsis thaliana protein match is: unknown protein (TAIR:AT2G10440.1); Has 103701 Blast hits to 43153 proteins in 1828 species: Archae - 30; Bacteria - 7385; Metazoa - 38639; Fungi - 11531; Plants - 7727; Viruses - 307; Other Eukaryotes - 38082 (source: NCBI BLink). | chr1:5430446-5435921 REVERSE LENGTH=1335	LOC_Os08g45080.1 protein|expressed protein	LOC_Os08g45080.1 protein|expressed protein	LOC_Os11g35750.1 protein|expressed protein
Homoeologous triplet 302	TRIAE_CS42_1AL_TGACv1_000710_AA0017580	TRIAE_CS42_1BL_TGACv1_031433_AA0113960	TRIAE_CS42_1DL_TGACv1_061065_AA0183750	AD-B	6	2	6	0.82066	0.901338	0.744515	290	545	477	279	45	43	AT4G09670.1 | Symbols: | Oxidoreductase family protein | chr4:6107382-6109049 REVERSE LENGTH=362	AT4G09670.1 | Symbols: | Oxidoreductase family protein | chr4:6107382-6109049 REVERSE LENGTH=362	AT4G09670.1 | Symbols: | Oxidoreductase family protein | chr4:6107382-6109049 REVERSE LENGTH=362	LOC_Os10g26400.1 protein|uncharacterized oxidoreductase, putative, expressed, LOC_Os10g26400.2 protein|uncharacterized oxidoreductase, putative, expressed	LOC_Os10g26400.1 protein|uncharacterized oxidoreductase, putative, expressed, LOC_Os10g26400.2 protein|uncharacterized oxidoreductase, putative, expressed	LOC_Os10g26400.1 protein|uncharacterized oxidoreductase, putative, expressed, LOC_Os10g26400.2 protein|uncharacterized oxidoreductase, putative, expressed
Homoeologous triplet 303	TRIAE_CS42_1AL_TGACv1_000710_AA0017570	TRIAE_CS42_1BL_TGACv1_031433_AA0113950	TRIAE_CS42_1DL_TGACv1_061065_AA0183740	ABD	8	8	8	0.932388	0.941739	0.979588	87	57	43	37	34	2	AT2G44970.1 | Symbols: | alpha/beta-Hydrolases superfamily protein | chr2:18548999-18552019 REVERSE LENGTH=503, AT2G44970.2 | Symbols: | alpha/beta-Hydrolases superfamily protein | chr2:18548999-18552019 REVERSE LENGTH=502	AT2G44970.1 | Symbols: | alpha/beta-Hydrolases superfamily protein | chr2:18548999-18552019 REVERSE LENGTH=503, AT2G44970.2 | Symbols: | alpha/beta-Hydrolases superfamily protein | chr2:18548999-18552019 REVERSE LENGTH=502	AT2G44970.1 | Symbols: | alpha/beta-Hydrolases superfamily protein | chr2:18548999-18552019 REVERSE LENGTH=503, AT2G44970.2 | Symbols: | alpha/beta-Hydrolases superfamily protein | chr2:18548999-18552019 REVERSE LENGTH=502	LOC_Os05g48416.1 protein|lipase-related, putative, expressed, LOC_Os05g48416.2 protein|lipase-related, putative, expressed	LOC_Os05g48416.1 protein|lipase-related, putative, expressed, LOC_Os05g48416.2 protein|lipase-related, putative, expressed	LOC_Os05g48416.1 protein|lipase-related, putative, expressed, LOC_Os05g48416.2 protein|lipase-related, putative, expressed
Homoeologous triplet 304	TRIAE_CS42_1AL_TGACv1_000711_AA0017640	TRIAE_CS42_1BL_TGACv1_030462_AA0091490	TRIAE_CS42_1DL_TGACv1_062267_AA0211600	BD-A	5	17	17	0.931094	0.856327	0.977656	51	46	49	1	5	0	AT5G60020.1 | Symbols: LAC17, ATLAC17 | laccase 17 | chr5:24168072-24170223 FORWARD LENGTH=577	AT5G60020.1 | Symbols: LAC17, ATLAC17 | laccase 17 | chr5:24168072-24170223 FORWARD LENGTH=577	AT5G60020.1 | Symbols: LAC17, ATLAC17 | laccase 17 | chr5:24168072-24170223 FORWARD LENGTH=577	LOC_Os05g38390.1 protein|laccase precursor protein, putative, expressed	LOC_Os05g38390.1 protein|laccase precursor protein, putative, expressed	LOC_Os05g38390.1 protein|laccase precursor protein, putative, expressed
Homoeologous triplet 305	TRIAE_CS42_1AL_TGACv1_000713_AA0017660	TRIAE_CS42_1BL_TGACv1_030777_AA0100580	TRIAE_CS42_5DL_TGACv1_434271_AA1432920	ABD	1	1	1	0.848008	0.487702	0.413569	120	120	80	6	71	67	AT3G09070.1 | Symbols: | Protein of unknown function (DUF740) | chr3:2768880-2770937 REVERSE LENGTH=685	AT3G09070.1 | Symbols: | Protein of unknown function (DUF740) | chr3:2768880-2770937 REVERSE LENGTH=685	AT3G09070.1 | Symbols: | Protein of unknown function (DUF740) | chr3:2768880-2770937 REVERSE LENGTH=685	LOC_Os05g37800.1 protein|DUF740 domain containing protein, expressed	LOC_Os05g37800.1 protein|DUF740 domain containing protein, expressed	LOC_Os05g37800.1 protein|DUF740 domain containing protein, expressed
Homoeologous triplet 306	TRIAE_CS42_1AL_TGACv1_000714_AA0017670	TRIAE_CS42_1BL_TGACv1_031843_AA0121580	TRIAE_CS42_1DL_TGACv1_064533_AA0234800	ABD	12	12	12	0.873807	0.871898	0.868766	89	94	46	5	10	16	AT3G63030.1 | Symbols: MBD4 | methyl-CPG-binding domain 4 | chr3:23295394-23296425 FORWARD LENGTH=186	AT3G63030.1 | Symbols: MBD4 | methyl-CPG-binding domain 4 | chr3:23295394-23296425 FORWARD LENGTH=186	AT3G63030.1 | Symbols: MBD4 | methyl-CPG-binding domain 4 | chr3:23295394-23296425 FORWARD LENGTH=186	LOC_Os05g33550.1 protein|methyl-binding domain protein MBD, putative, expressed, LOC_Os05g33550.2 protein|methyl-binding domain protein MBD, putative, expressed	LOC_Os05g33550.1 protein|methyl-binding domain protein MBD, putative, expressed, LOC_Os05g33550.2 protein|methyl-binding domain protein MBD, putative, expressed	LOC_Os05g33550.1 protein|methyl-binding domain protein MBD, putative, expressed, LOC_Os05g33550.2 protein|methyl-binding domain protein MBD, putative, expressed
Homoeologous triplet 307	TRIAE_CS42_1AL_TGACv1_000718_AA0017750	TRIAE_CS42_1BL_TGACv1_032748_AA0133710	TRIAE_CS42_1DL_TGACv1_062690_AA0218190	ABD	1	1	1	0.911171	0.906086	0.88932	672	656	623	0	11	14	AT2G47210.1 | Symbols: | myb-like transcription factor family protein | chr2:19379039-19382204 FORWARD LENGTH=441	AT2G47210.1 | Symbols: | myb-like transcription factor family protein | chr2:19379039-19382204 FORWARD LENGTH=441	AT2G47210.1 | Symbols: | myb-like transcription factor family protein | chr2:19379039-19382204 FORWARD LENGTH=441	LOC_Os05g46330.1 protein|MYB family transcription factor, putative, expressed	LOC_Os05g46330.1 protein|MYB family transcription factor, putative, expressed	LOC_Os05g46330.1 protein|MYB family transcription factor, putative, expressed
Homoeologous triplet 308	TRIAE_CS42_1AL_TGACv1_000719_AA0017780	TRIAE_CS42_1BL_TGACv1_033350_AA0138900	TRIAE_CS42_1DL_TGACv1_061939_AA0205990	ABD	7	7	7	0.978865	0.978754	0.984653	299	275	389	1	10	10	AT4G03110.1 | Symbols: AtRBP-DR1, RBP-DR1 | RNA-binding protein-defense related 1 | chr4:1376612-1379275 REVERSE LENGTH=441, AT4G03110.2 | Symbols: AtRBP-DR1, RBP-DR1 | RNA-binding protein-defense related 1 | chr4:1376710-1379275 REVERSE LENGTH=439	AT4G03110.1 | Symbols: AtRBP-DR1, RBP-DR1 | RNA-binding protein-defense related 1 | chr4:1376612-1379275 REVERSE LENGTH=441, AT4G03110.2 | Symbols: AtRBP-DR1, RBP-DR1 | RNA-binding protein-defense related 1 | chr4:1376710-1379275 REVERSE LENGTH=439	AT4G03110.1 | Symbols: AtRBP-DR1, RBP-DR1 | RNA-binding protein-defense related 1 | chr4:1376612-1379275 REVERSE LENGTH=441, AT4G03110.2 | Symbols: AtRBP-DR1, RBP-DR1 | RNA-binding protein-defense related 1 | chr4:1376710-1379275 REVERSE LENGTH=439	LOC_Os05g30980.1 protein|RNA recognition motif containing protein, putative, expressed, LOC_Os05g30980.2 protein|RNA recognition motif containing protein, putative, expressed	LOC_Os05g30980.1 protein|RNA recognition motif containing protein, putative, expressed, LOC_Os05g30980.2 protein|RNA recognition motif containing protein, putative, expressed	LOC_Os05g30980.1 protein|RNA recognition motif containing protein, putative, expressed, LOC_Os05g30980.2 protein|RNA recognition motif containing protein, putative, expressed
Homoeologous triplet 309	TRIAE_CS42_1AL_TGACv1_000719_AA0017770	TRIAE_CS42_1BL_TGACv1_031297_AA0111050	TRIAE_CS42_1DL_TGACv1_061939_AA0205980	ABD	1	1	1	0.851884	0.900488	0.924675	498	520	539	130	83	33	AT1G08860.1 | Symbols: BON3 | Calcium-dependent phospholipid-binding Copine family protein | chr1:2842153-2846138 FORWARD LENGTH=584	AT1G08860.1 | Symbols: BON3 | Calcium-dependent phospholipid-binding Copine family protein | chr1:2842153-2846138 FORWARD LENGTH=584	AT1G08860.1 | Symbols: BON3 | Calcium-dependent phospholipid-binding Copine family protein | chr1:2842153-2846138 FORWARD LENGTH=584	LOC_Os05g30970.1 protein|copine, putative, expressed	LOC_Os05g30970.1 protein|copine, putative, expressed	LOC_Os05g30970.1 protein|copine, putative, expressed
Homoeologous triplet 310	TRIAE_CS42_1AL_TGACv1_000720_AA0017900	TRIAE_CS42_1BL_TGACv1_032679_AA0132800	TRIAE_CS42_1DL_TGACv1_061508_AA0197220	ABD	1	1	1	0.510022	0.569017	0.732168	19	108	9	86	1	39	No hits found	No hits found	No hits found	LOC_Os08g10340.1 protein|OsFBX278 - F-box domain containing protein, expressed	LOC_Os08g10340.1 protein|OsFBX278 - F-box domain containing protein, expressed	LOC_Os08g10340.1 protein|OsFBX278 - F-box domain containing protein, expressed
Homoeologous triplet 311	TRIAE_CS42_1AL_TGACv1_000720_AA0017860	TRIAE_CS42_1BL_TGACv1_030974_AA0104860	TRIAE_CS42_1DL_TGACv1_064567_AA0234930	AD-B	10	0	10	0.150003	0.888012	0.254553	191	455	294	319	92	281	AT1G29640.1 | Symbols: | Protein of unknown function, DUF584 | chr1:10355959-10356381 REVERSE LENGTH=140	AT4G18980.1 | Symbols: AtS40-3 | AtS40-3 | chr4:10398973-10399293 FORWARD LENGTH=106	AT4G18980.1 | Symbols: AtS40-3 | AtS40-3 | chr4:10398973-10399293 FORWARD LENGTH=106	LOC_Os05g45450.1 protein|DUF584 domain containing protein, putative, expressed	LOC_Os05g45450.1 protein|DUF584 domain containing protein, putative, expressed	LOC_Os05g45450.1 protein|DUF584 domain containing protein, putative, expressed
Homoeologous triplet 312	TRIAE_CS42_1AL_TGACv1_000720_AA0017840	TRIAE_CS42_1BL_TGACv1_030400_AA0089590	TRIAE_CS42_1DL_TGACv1_061202_AA0188570	ABD	1	1	1	0.965028	0.963504	0.960847	95	84	97	0	2	1	AT2G42800.1 | Symbols: AtRLP29, RLP29 | receptor like protein 29 | chr2:17808157-17809545 REVERSE LENGTH=462	AT2G42800.1 | Symbols: AtRLP29, RLP29 | receptor like protein 29 | chr2:17808157-17809545 REVERSE LENGTH=462	AT2G42800.1 | Symbols: AtRLP29, RLP29 | receptor like protein 29 | chr2:17808157-17809545 REVERSE LENGTH=462	LOC_Os05g45430.1 protein|TOO MANY MOUTHS precursor, putative, expressed	LOC_Os05g45430.1 protein|TOO MANY MOUTHS precursor, putative, expressed	LOC_Os05g45430.1 protein|TOO MANY MOUTHS precursor, putative, expressed
Homoeologous triplet 313	TRIAE_CS42_1AL_TGACv1_000725_AA0017980	TRIAE_CS42_1BL_TGACv1_031186_AA0109330	TRIAE_CS42_1DL_TGACv1_062300_AA0212070	ABD	3	3	3	0.956644	0.932929	0.898374	134	214	152	44	8	46	AT1G59700.1 | Symbols: ATGSTU16, GSTU16 | glutathione S-transferase TAU 16 | chr1:21936459-21937763 FORWARD LENGTH=234	AT1G59670.1 | Symbols: ATGSTU15, GSTU15 | glutathione S-transferase TAU 15 | chr1:21930035-21931228 FORWARD LENGTH=233	AT1G59700.1 | Symbols: ATGSTU16, GSTU16 | glutathione S-transferase TAU 16 | chr1:21936459-21937763 FORWARD LENGTH=234	LOC_Os10g38700.1 protein|glutathione S-transferase, putative, expressed	LOC_Os10g38710.1 protein|glutathione S-transferase, putative, expressed	LOC_Os10g38700.1 protein|glutathione S-transferase, putative, expressed
Homoeologous triplet 314	TRIAE_CS42_1AL_TGACv1_000728_AA0018030	TRIAE_CS42_1BL_TGACv1_033044_AA0136400	TRIAE_CS42_1DL_TGACv1_062001_AA0207180	A-B-D	1	5	4	0.83874	0.894621	0.903052	152	144	132	20	10	10	AT4G38620.1 | Symbols: ATMYB4, MYB4 | myb domain protein 4 | chr4:18053866-18054876 FORWARD LENGTH=282	AT4G38620.1 | Symbols: ATMYB4, MYB4 | myb domain protein 4 | chr4:18053866-18054876 FORWARD LENGTH=282	AT4G09460.1 | Symbols: AtMYB6, MYB6 | myb domain protein 6 | chr4:5993019-5994038 FORWARD LENGTH=236	LOC_Os05g35500.1 protein|MYB family transcription factor, putative, expressed	LOC_Os05g35500.1 protein|MYB family transcription factor, putative, expressed	LOC_Os05g35500.1 protein|MYB family transcription factor, putative, expressed
Homoeologous triplet 315	TRIAE_CS42_1AL_TGACv1_000734_AA0018090	TRIAE_CS42_1BL_TGACv1_032207_AA0126810	TRIAE_CS42_1DL_TGACv1_063094_AA0223830	ABD	6	6	6	0.952377	0.96857	0.970291	649	661	646	22	68	41	AT3G18000.1 | Symbols: NMT1, XPL1, PEAMT | S-adenosyl-L-methionine-dependent methyltransferases superfamily protein | chr3:6154578-6157331 FORWARD LENGTH=491	AT3G18000.1 | Symbols: NMT1, XPL1, PEAMT | S-adenosyl-L-methionine-dependent methyltransferases superfamily protein | chr3:6154578-6157331 FORWARD LENGTH=491	AT3G18000.1 | Symbols: NMT1, XPL1, PEAMT | S-adenosyl-L-methionine-dependent methyltransferases superfamily protein | chr3:6154578-6157331 FORWARD LENGTH=491	LOC_Os05g47540.4 protein|CPuORF26 - conserved peptide uORF-containing transcript, expressed, LOC_Os05g47540.1 protein|CPuORF26 - conserved peptide uORF-containing transcript, expressed, LOC_Os05g47540.5 protein|CPuORF26 - conserved peptide uORF-containing transcript, expressed, LOC_Os05g47540.2 protein|CPuORF26 - conserved peptide uORF-containing transcript, expressed, LOC_Os05g47540.3 protein|CP…	LOC_Os05g47540.4 protein|CPuORF26 - conserved peptide uORF-containing transcript, expressed, LOC_Os05g47540.1 protein|CPuORF26 - conserved peptide uORF-containing transcript, expressed, LOC_Os05g47540.5 protein|CPuORF26 - conserved peptide uORF-containing transcript, expressed, LOC_Os05g47540.2 protein|CPuORF26 - conserved peptide uORF-containing transcript, expressed, LOC_Os05g47540.3 protein|CP…	LOC_Os05g47540.4 protein|CPuORF26 - conserved peptide uORF-containing transcript, expressed, LOC_Os05g47540.1 protein|CPuORF26 - conserved peptide uORF-containing transcript, expressed, LOC_Os05g47540.5 protein|CPuORF26 - conserved peptide uORF-containing transcript, expressed, LOC_Os05g47540.2 protein|CPuORF26 - conserved peptide uORF-containing transcript, expressed, LOC_Os05g47540.3 protein|CP…
Homoeologous triplet 316	TRIAE_CS42_1AL_TGACv1_000734_AA0018070	TRIAE_CS42_1BL_TGACv1_031416_AA0113580	TRIAE_CS42_1DL_TGACv1_063094_AA0223800	ABD	6	6	6	0.967349	0.974056	0.967306	634	665	695	128	98	121	AT1G68830.1 | Symbols: STN7 | STT7 homolog STN7 | chr1:25872654-25875473 REVERSE LENGTH=562	AT1G68830.1 | Symbols: STN7 | STT7 homolog STN7 | chr1:25872654-25875473 REVERSE LENGTH=562	AT1G68830.1 | Symbols: STN7 | STT7 homolog STN7 | chr1:25872654-25875473 REVERSE LENGTH=562	LOC_Os05g47560.1 protein|serine/threonine-protein kinase SNT7, chloroplast precursor, putative, expressed	LOC_Os05g47560.1 protein|serine/threonine-protein kinase SNT7, chloroplast precursor, putative, expressed	LOC_Os05g47560.1 protein|serine/threonine-protein kinase SNT7, chloroplast precursor, putative, expressed
Homoeologous triplet 317	TRIAE_CS42_1AL_TGACv1_000735_AA0018120	TRIAE_CS42_1BL_TGACv1_032476_AA0130290	TRIAE_CS42_1DL_TGACv1_063462_AA0227540	Not clustered	0	0	0	0.96028	0.980529	0.965383	645	588	657	107	39	394	AT4G16260.1 | Symbols: | Glycosyl hydrolase superfamily protein | chr4:9200180-9201441 REVERSE LENGTH=344	AT4G16260.1 | Symbols: | Glycosyl hydrolase superfamily protein | chr4:9200180-9201441 REVERSE LENGTH=344	AT4G16260.1 | Symbols: | Glycosyl hydrolase superfamily protein | chr4:9200180-9201441 REVERSE LENGTH=344	LOC_Os05g31140.3 protein|glycosyl hydrolases family 17, putative, expressed, LOC_Os05g31140.1 protein|glycosyl hydrolases family 17, putative, expressed, LOC_Os05g31140.2 protein|glycosyl hydrolases family 17, putative, expressed	LOC_Os05g31140.3 protein|glycosyl hydrolases family 17, putative, expressed, LOC_Os05g31140.1 protein|glycosyl hydrolases family 17, putative, expressed, LOC_Os05g31140.2 protein|glycosyl hydrolases family 17, putative, expressed	LOC_Os05g31140.3 protein|glycosyl hydrolases family 17, putative, expressed, LOC_Os05g31140.1 protein|glycosyl hydrolases family 17, putative, expressed, LOC_Os05g31140.2 protein|glycosyl hydrolases family 17, putative, expressed
Homoeologous triplet 318	TRIAE_CS42_1AL_TGACv1_000746_AA0018250	TRIAE_CS42_1BL_TGACv1_033849_AA0142320	TRIAE_CS42_1DL_TGACv1_061737_AA0202700	BD-A	6	2	2	0.789957	0.831066	0.959339	627	568	598	46	13	5	AT2G38780.1 | Symbols: | unknown protein; FUNCTIONS IN: molecular_function unknown; INVOLVED IN: biological_process unknown; LOCATED IN: chloroplast; EXPRESSED IN: 21 plant structures; EXPRESSED DURING: 13 growth stages; Has 58 Blast hits to 58 proteins in 23 species: Archae - 0; Bacteria - 4; Metazoa - 1; Fungi - 0; Plants - 44; Viruses - 0; Other Eukaryotes - 9 (source: NCBI BLink). | chr2:1621…	AT2G38780.1 | Symbols: | unknown protein; FUNCTIONS IN: molecular_function unknown; INVOLVED IN: biological_process unknown; LOCATED IN: chloroplast; EXPRESSED IN: 21 plant structures; EXPRESSED DURING: 13 growth stages; Has 58 Blast hits to 58 proteins in 23 species: Archae - 0; Bacteria - 4; Metazoa - 1; Fungi - 0; Plants - 44; Viruses - 0; Other Eukaryotes - 9 (source: NCBI BLink). | chr2:1621…	AT2G38780.1 | Symbols: | unknown protein; FUNCTIONS IN: molecular_function unknown; INVOLVED IN: biological_process unknown; LOCATED IN: chloroplast; EXPRESSED IN: 21 plant structures; EXPRESSED DURING: 13 growth stages; Has 58 Blast hits to 58 proteins in 23 species: Archae - 0; Bacteria - 4; Metazoa - 1; Fungi - 0; Plants - 44; Viruses - 0; Other Eukaryotes - 9 (source: NCBI BLink). | chr2:1621…	LOC_Os05g31680.1 protein|expressed protein	LOC_Os05g31680.1 protein|expressed protein	LOC_Os05g31680.1 protein|expressed protein
Homoeologous triplet 319	TRIAE_CS42_1AL_TGACv1_000747_AA0018270	TRIAE_CS42_1BL_TGACv1_031758_AA0120200	TRIAE_CS42_1DL_TGACv1_061509_AA0197270	BD-A	0	1	1	0.340032	0.45647	0.82753	39	350	242	215	121	6	AT5G48820.1 | Symbols: KRP3, ICK6 | inhibitor/interactor with cyclin-dependent kinase | chr5:19792608-19794346 REVERSE LENGTH=222, AT5G48820.2 | Symbols: ICK6 | inhibitor/interactor with cyclin-dependent kinase | chr5:19792608-19794346 REVERSE LENGTH=240	AT5G48820.1 | Symbols: KRP3, ICK6 | inhibitor/interactor with cyclin-dependent kinase | chr5:19792608-19794346 REVERSE LENGTH=222, AT5G48820.2 | Symbols: ICK6 | inhibitor/interactor with cyclin-dependent kinase | chr5:19792608-19794346 REVERSE LENGTH=240	AT5G48820.1 | Symbols: KRP3, ICK6 | inhibitor/interactor with cyclin-dependent kinase | chr5:19792608-19794346 REVERSE LENGTH=222, AT5G48820.2 | Symbols: ICK6 | inhibitor/interactor with cyclin-dependent kinase | chr5:19792608-19794346 REVERSE LENGTH=240	LOC_Os03g04490.1 protein|cyclin-dependent kinase inhibitor, putative, expressed	LOC_Os10g33310.1 protein|cyclin-dependent kinase inhibitor, putative, expressed	LOC_Os10g33310.1 protein|cyclin-dependent kinase inhibitor, putative, expressed
Homoeologous triplet 320	TRIAE_CS42_1AL_TGACv1_000750_AA0018310	TRIAE_CS42_1BL_TGACv1_033482_AA0139790	TRIAE_CS42_1DL_TGACv1_061159_AA0187440	BD-A	1	3	3	0.656151	0.801174	0.808324	287	69	163	212	63	65	AT4G23180.1 | Symbols: CRK10, RLK4 | cysteine-rich RLK (RECEPTOR-like protein kinase) 10 | chr4:12138171-12140780 FORWARD LENGTH=669	AT4G23130.1 | Symbols: CRK5, RLK6 | cysteine-rich RLK (RECEPTOR-like protein kinase) 5 | chr4:12117688-12120134 REVERSE LENGTH=659, AT4G23130.2 | Symbols: CRK5, RLK6 | cysteine-rich RLK (RECEPTOR-like protein kinase) 5 | chr4:12117688-12120134 REVERSE LENGTH=663	AT4G23180.1 | Symbols: CRK10, RLK4 | cysteine-rich RLK (RECEPTOR-like protein kinase) 10 | chr4:12138171-12140780 FORWARD LENGTH=669	LOC_Os07g35410.1 protein|TKL_IRAK_DUF26-lc.18 - DUF26 kinases have homology to DUF26 containing loci, expressed	LOC_Os07g35410.1 protein|TKL_IRAK_DUF26-lc.18 - DUF26 kinases have homology to DUF26 containing loci, expressed	LOC_Os07g35410.1 protein|TKL_IRAK_DUF26-lc.18 - DUF26 kinases have homology to DUF26 containing loci, expressed
Homoeologous triplet 321	TRIAE_CS42_1AL_TGACv1_000751_AA0018370	TRIAE_CS42_1BL_TGACv1_031497_AA0115100	TRIAE_CS42_1DL_TGACv1_061738_AA0202720	ABD	1	1	1	0.764944	0.793081	0.76798	708	706	698	34	24	26	AT5G08370.1 | Symbols: AtAGAL2, AGAL2 | alpha-galactosidase 2 | chr5:2691116-2693441 REVERSE LENGTH=396, AT5G08370.2 | Symbols: AtAGAL2, AGAL2 | alpha-galactosidase 2 | chr5:2691116-2693441 REVERSE LENGTH=370	AT5G08370.1 | Symbols: AtAGAL2, AGAL2 | alpha-galactosidase 2 | chr5:2691116-2693441 REVERSE LENGTH=396, AT5G08370.2 | Symbols: AtAGAL2, AGAL2 | alpha-galactosidase 2 | chr5:2691116-2693441 REVERSE LENGTH=370	AT5G08370.1 | Symbols: AtAGAL2, AGAL2 | alpha-galactosidase 2 | chr5:2691116-2693441 REVERSE LENGTH=396, AT5G08370.2 | Symbols: AtAGAL2, AGAL2 | alpha-galactosidase 2 | chr5:2691116-2693441 REVERSE LENGTH=370	LOC_Os10g35110.1 protein|alpha-galactosidase precursor, putative, expressed, LOC_Os10g35110.2 protein|alpha-galactosidase precursor, putative, expressed, LOC_Os10g35110.3 protein|alpha-galactosidase precursor, putative, expressed	LOC_Os10g35110.1 protein|alpha-galactosidase precursor, putative, expressed, LOC_Os10g35110.2 protein|alpha-galactosidase precursor, putative, expressed, LOC_Os10g35110.3 protein|alpha-galactosidase precursor, putative, expressed	LOC_Os10g35110.1 protein|alpha-galactosidase precursor, putative, expressed, LOC_Os10g35110.2 protein|alpha-galactosidase precursor, putative, expressed, LOC_Os10g35110.3 protein|alpha-galactosidase precursor, putative, expressed
Homoeologous triplet 322	TRIAE_CS42_1AL_TGACv1_000753_AA0018400	TRIAE_CS42_1BL_TGACv1_031483_AA0114930	TRIAE_CS42_1DL_TGACv1_063855_AA0231260	ABD	7	7	7	0.783065	0.792849	0.92286	727	727	727	16	2	0	AT4G39150.1 | Symbols: | DNAJ heat shock N-terminal domain-containing protein | chr4:18233651-18235740 REVERSE LENGTH=345, AT4G39150.2 | Symbols: | DNAJ heat shock N-terminal domain-containing protein | chr4:18233651-18235740 REVERSE LENGTH=345	AT4G39150.1 | Symbols: | DNAJ heat shock N-terminal domain-containing protein | chr4:18233651-18235740 REVERSE LENGTH=345, AT4G39150.2 | Symbols: | DNAJ heat shock N-terminal domain-containing protein | chr4:18233651-18235740 REVERSE LENGTH=345	AT4G39150.1 | Symbols: | DNAJ heat shock N-terminal domain-containing protein | chr4:18233651-18235740 REVERSE LENGTH=345, AT4G39150.2 | Symbols: | DNAJ heat shock N-terminal domain-containing protein | chr4:18233651-18235740 REVERSE LENGTH=345	LOC_Os05g46620.1 protein|chaperone protein dnaJ 10, putative, expressed	LOC_Os05g46620.1 protein|chaperone protein dnaJ 10, putative, expressed	LOC_Os05g46620.1 protein|chaperone protein dnaJ 10, putative, expressed
Homoeologous triplet 323	TRIAE_CS42_1AL_TGACv1_000754_AA0018410	TRIAE_CS42_1BL_TGACv1_033310_AA0138650	TRIAE_CS42_1DL_TGACv1_063046_AA0223300	ABD	5	5	5	0.836847	0.754128	0.843127	51	62	94	9	30	17	AT2G38480.1 | Symbols: | Uncharacterised protein family (UPF0497) | chr2:16110960-16111694 REVERSE LENGTH=188	AT2G38480.1 | Symbols: | Uncharacterised protein family (UPF0497) | chr2:16110960-16111694 REVERSE LENGTH=188	AT2G38480.1 | Symbols: | Uncharacterised protein family (UPF0497) | chr2:16110960-16111694 REVERSE LENGTH=188	LOC_Os05g27790.1 protein|membrane associated DUF588 domain containing protein, putative, expressed	LOC_Os05g27790.1 protein|membrane associated DUF588 domain containing protein, putative, expressed	LOC_Os05g27790.1 protein|membrane associated DUF588 domain containing protein, putative, expressed
Homoeologous triplet 324	TRIAE_CS42_1AL_TGACv1_000755_AA0018450	TRIAE_CS42_1BL_TGACv1_032269_AA0127750	TRIAE_CS42_1DL_TGACv1_063603_AA0229020	AD-B	1	3	1	0.822463	0.889933	0.911264	717	711	727	3	10	15	AT4G26270.1 | Symbols: PFK3 | phosphofructokinase 3 | chr4:13301094-13304030 REVERSE LENGTH=489	AT4G26270.1 | Symbols: PFK3 | phosphofructokinase 3 | chr4:13301094-13304030 REVERSE LENGTH=489	AT4G26270.1 | Symbols: PFK3 | phosphofructokinase 3 | chr4:13301094-13304030 REVERSE LENGTH=489	LOC_Os05g44922.2 protein|6-phosphofructokinase, putative, expressed, LOC_Os05g44922.1 protein|6-phosphofructokinase, putative, expressed	LOC_Os05g44922.2 protein|6-phosphofructokinase, putative, expressed, LOC_Os05g44922.1 protein|6-phosphofructokinase, putative, expressed	LOC_Os05g44922.2 protein|6-phosphofructokinase, putative, expressed, LOC_Os05g44922.1 protein|6-phosphofructokinase, putative, expressed
Homoeologous triplet 325	TRIAE_CS42_1AL_TGACv1_000755_AA0018460	TRIAE_CS42_1BL_TGACv1_032269_AA0127740	TRIAE_CS42_1DL_TGACv1_063603_AA0229010	ABD	1	1	1	0.722657	0.900851	0.766544	725	683	727	66	0	67	AT1G51980.1 | Symbols: | Insulinase (Peptidase family M16) protein | chr1:19323692-19326771 REVERSE LENGTH=503, AT1G51980.2 | Symbols: | Insulinase (Peptidase family M16) protein | chr1:19323929-19326771 REVERSE LENGTH=451	AT1G51980.1 | Symbols: | Insulinase (Peptidase family M16) protein | chr1:19323692-19326771 REVERSE LENGTH=503, AT1G51980.2 | Symbols: | Insulinase (Peptidase family M16) protein | chr1:19323929-19326771 REVERSE LENGTH=451	AT1G51980.1 | Symbols: | Insulinase (Peptidase family M16) protein | chr1:19323692-19326771 REVERSE LENGTH=503, AT1G51980.2 | Symbols: | Insulinase (Peptidase family M16) protein | chr1:19323929-19326771 REVERSE LENGTH=451	LOC_Os01g53700.1 protein|mitochondrial-processing peptidase subunit, mitochondrial precursor, putative, expressed	LOC_Os01g53700.1 protein|mitochondrial-processing peptidase subunit, mitochondrial precursor, putative, expressed	LOC_Os01g53700.1 protein|mitochondrial-processing peptidase subunit, mitochondrial precursor, putative, expressed
Homoeologous triplet 326	TRIAE_CS42_1AL_TGACv1_000756_AA0018500	TRIAE_CS42_1BL_TGACv1_032768_AA0133960	TRIAE_CS42_1DL_TGACv1_061137_AA0186580	ABD	1	1	1	0.846056	0.813746	0.912788	727	727	727	2	6	4	AT1G11910.1 | Symbols: APA1, ATAPA1 | aspartic proteinase A1 | chr1:4017119-4019874 REVERSE LENGTH=506	AT1G11910.1 | Symbols: APA1, ATAPA1 | aspartic proteinase A1 | chr1:4017119-4019874 REVERSE LENGTH=506	AT1G11910.1 | Symbols: APA1, ATAPA1 | aspartic proteinase A1 | chr1:4017119-4019874 REVERSE LENGTH=506	LOC_Os05g49200.1 protein|aspartic proteinase oryzasin-1 precursor, putative, expressed, LOC_Os05g49200.2 protein|aspartic proteinase oryzasin-1 precursor, putative, expressed	LOC_Os05g49200.1 protein|aspartic proteinase oryzasin-1 precursor, putative, expressed, LOC_Os05g49200.2 protein|aspartic proteinase oryzasin-1 precursor, putative, expressed	LOC_Os05g49200.1 protein|aspartic proteinase oryzasin-1 precursor, putative, expressed, LOC_Os05g49200.2 protein|aspartic proteinase oryzasin-1 precursor, putative, expressed
Homoeologous triplet 327	TRIAE_CS42_1AL_TGACv1_000758_AA0018550	TRIAE_CS42_1BL_TGACv1_033448_AA0139520	TRIAE_CS42_1DL_TGACv1_063374_AA0226760	ABD	13	13	13	0.838279	0.902699	0.922383	555	629	598	16	14	8	AT4G35470.1 | Symbols: PIRL4 | plant intracellular ras group-related LRR 4 | chr4:16846531-16848448 FORWARD LENGTH=549	AT4G35470.1 | Symbols: PIRL4 | plant intracellular ras group-related LRR 4 | chr4:16846531-16848448 FORWARD LENGTH=549	AT4G35470.1 | Symbols: PIRL4 | plant intracellular ras group-related LRR 4 | chr4:16846531-16848448 FORWARD LENGTH=549	LOC_Os10g42190.1 protein|leucine rich repeat containing protein, expressed, LOC_Os10g42190.2 protein|leucine rich repeat containing protein, expressed	LOC_Os10g42190.1 protein|leucine rich repeat containing protein, expressed, LOC_Os10g42190.2 protein|leucine rich repeat containing protein, expressed	LOC_Os10g42190.1 protein|leucine rich repeat containing protein, expressed, LOC_Os10g42190.2 protein|leucine rich repeat containing protein, expressed
Homoeologous triplet 328	TRIAE_CS42_1AL_TGACv1_000759_AA0018570	TRIAE_CS42_1BL_TGACv1_031255_AA0110430	TRIAE_CS42_1DL_TGACv1_062489_AA0215210	ABD	1	1	1	0.920783	0.949632	0.930169	727	727	727	0	0	1	AT5G23630.1 | Symbols: PDR2, MIA | phosphate deficiency response 2 | chr5:7960756-7967644 REVERSE LENGTH=1179	AT5G23630.1 | Symbols: PDR2, MIA | phosphate deficiency response 2 | chr5:7960756-7967644 REVERSE LENGTH=1179	AT5G23630.1 | Symbols: PDR2, MIA | phosphate deficiency response 2 | chr5:7960756-7967644 REVERSE LENGTH=1179	LOC_Os05g33390.1 protein|cation-transporting ATPase, putative, expressed	LOC_Os05g33390.1 protein|cation-transporting ATPase, putative, expressed	LOC_Os05g33390.1 protein|cation-transporting ATPase, putative, expressed
Homoeologous triplet 329	TRIAE_CS42_1AL_TGACv1_000759_AA0018560	TRIAE_CS42_1BL_TGACv1_030614_AA0095800	TRIAE_CS42_1DL_TGACv1_062016_AA0207440	ABD	1	1	1	0.606532	0.921043	0.590893	727	727	727	20	0	28	AT4G15470.1 | Symbols: | Bax inhibitor-1 family protein | chr4:8843661-8845505 FORWARD LENGTH=256	AT4G15470.1 | Symbols: | Bax inhibitor-1 family protein | chr4:8843661-8845505 FORWARD LENGTH=256	AT4G15470.1 | Symbols: | Bax inhibitor-1 family protein | chr4:8843661-8845505 FORWARD LENGTH=256	LOC_Os05g33360.1 protein|transmembrane BAX inhibitor motif-containing protein, putative, expressed	LOC_Os05g33360.1 protein|transmembrane BAX inhibitor motif-containing protein, putative, expressed	LOC_Os05g33360.1 protein|transmembrane BAX inhibitor motif-containing protein, putative, expressed
Homoeologous triplet 330	TRIAE_CS42_1AL_TGACv1_000762_AA0018600	TRIAE_CS42_1BL_TGACv1_030456_AA0091210	TRIAE_CS42_1DL_TGACv1_061867_AA0204820	ABD	1	1	1	0.608461	0.790213	0.689684	727	722	727	8	2	7	AT5G46030.1 | Symbols: | unknown protein; CONTAINS InterPro DOMAIN/s: Protein of unknown function DUF701, zinc-binding putative (InterPro:IPR007808); Has 30201 Blast hits to 17322 proteins in 780 species: Archae - 12; Bacteria - 1396; Metazoa - 17338; Fungi - 3422; Plants - 5037; Viruses - 0; Other Eukaryotes - 2996 (source: NCBI BLink). | chr5:18670531-18671138 FORWARD LENGTH=120	AT5G46030.1 | Symbols: | unknown protein; CONTAINS InterPro DOMAIN/s: Protein of unknown function DUF701, zinc-binding putative (InterPro:IPR007808); Has 30201 Blast hits to 17322 proteins in 780 species: Archae - 12; Bacteria - 1396; Metazoa - 17338; Fungi - 3422; Plants - 5037; Viruses - 0; Other Eukaryotes - 2996 (source: NCBI BLink). | chr5:18670531-18671138 FORWARD LENGTH=120	AT5G46030.1 | Symbols: | unknown protein; CONTAINS InterPro DOMAIN/s: Protein of unknown function DUF701, zinc-binding putative (InterPro:IPR007808); Has 30201 Blast hits to 17322 proteins in 780 species: Archae - 12; Bacteria - 1396; Metazoa - 17338; Fungi - 3422; Plants - 5037; Viruses - 0; Other Eukaryotes - 2996 (source: NCBI BLink). | chr5:18670531-18671138 FORWARD LENGTH=120	LOC_Os02g04160.1 protein|transcription elongation factor 1, putative, expressed, LOC_Os02g04160.2 protein|transcription elongation factor 1, putative, expressed	LOC_Os02g04160.1 protein|transcription elongation factor 1, putative, expressed, LOC_Os02g04160.2 protein|transcription elongation factor 1, putative, expressed	LOC_Os02g04160.1 protein|transcription elongation factor 1, putative, expressed, LOC_Os02g04160.2 protein|transcription elongation factor 1, putative, expressed
Homoeologous triplet 331	TRIAE_CS42_1AL_TGACv1_000767_AA0018710	TRIAE_CS42_1BL_TGACv1_031653_AA0117940	TRIAE_CS42_3DS_TGACv1_271578_AA0902860	AD-B	3	0	3	0.543841	0.667437	0.333768	627	410	650	169	37	250	AT1G74320.1 | Symbols: | Protein kinase superfamily protein | chr1:27941192-27942903 FORWARD LENGTH=350	AT1G74320.1 | Symbols: | Protein kinase superfamily protein | chr1:27941192-27942903 FORWARD LENGTH=350	AT1G74320.1 | Symbols: | Protein kinase superfamily protein | chr1:27941192-27942903 FORWARD LENGTH=350	LOC_Os05g45880.1 protein|phosphotransferase, putative, expressed	LOC_Os05g45880.1 protein|phosphotransferase, putative, expressed	LOC_Os05g45880.1 protein|phosphotransferase, putative, expressed
Homoeologous triplet 332	TRIAE_CS42_1AL_TGACv1_000770_AA0018780	TRIAE_CS42_1BL_TGACv1_030327_AA0086810	TRIAE_CS42_1DL_TGACv1_061343_AA0192700	ABD	1	1	1	0.963659	0.953551	0.967934	254	253	203	1	2	3	AT5G66230.1 | Symbols: | Chalcone-flavanone isomerase family protein | chr5:26462704-26463873 FORWARD LENGTH=329, AT5G66230.2 | Symbols: | Chalcone-flavanone isomerase family protein | chr5:26461177-26463873 FORWARD LENGTH=545	AT5G66230.1 | Symbols: | Chalcone-flavanone isomerase family protein | chr5:26462704-26463873 FORWARD LENGTH=329, AT5G66230.2 | Symbols: | Chalcone-flavanone isomerase family protein | chr5:26461177-26463873 FORWARD LENGTH=545	AT5G66230.1 | Symbols: | Chalcone-flavanone isomerase family protein | chr5:26462704-26463873 FORWARD LENGTH=329, AT5G66230.2 | Symbols: | Chalcone-flavanone isomerase family protein | chr5:26461177-26463873 FORWARD LENGTH=545	LOC_Os10g42660.1 protein|expressed protein	LOC_Os10g42660.1 protein|expressed protein	LOC_Os10g42660.1 protein|expressed protein
Homoeologous triplet 333	TRIAE_CS42_1AL_TGACv1_000771_AA0018790	TRIAE_CS42_1BL_TGACv1_033860_AA0142380	TRIAE_CS42_1DL_TGACv1_062512_AA0215710	AB-D	13	13	10	0.930341	0.471925	0.330939	526	249	582	76	14	211	AT3G17611.2 | Symbols: ATRBL14, RBL14 | RHOMBOID-like protein 14 | chr3:6025454-6026173 FORWARD LENGTH=239, AT3G17611.1 | Symbols: ATRBL14, RBL14 | RHOMBOID-like protein 14 | chr3:6024946-6026173 FORWARD LENGTH=334, AT3G17611.3 | Symbols: ATRBL14, RBL14 | RHOMBOID-like protein 14 | chr3:6025652-6026173 FORWARD LENGTH=173	AT3G17611.2 | Symbols: ATRBL14, RBL14 | RHOMBOID-like protein 14 | chr3:6025454-6026173 FORWARD LENGTH=239, AT3G17611.1 | Symbols: ATRBL14, RBL14 | RHOMBOID-like protein 14 | chr3:6024946-6026173 FORWARD LENGTH=334, AT3G17611.3 | Symbols: ATRBL14, RBL14 | RHOMBOID-like protein 14 | chr3:6025652-6026173 FORWARD LENGTH=173	AT3G17611.2 | Symbols: ATRBL14, RBL14 | RHOMBOID-like protein 14 | chr3:6025454-6026173 FORWARD LENGTH=239, AT3G17611.1 | Symbols: ATRBL14, RBL14 | RHOMBOID-like protein 14 | chr3:6024946-6026173 FORWARD LENGTH=334, AT3G17611.3 | Symbols: ATRBL14, RBL14 | RHOMBOID-like protein 14 | chr3:6025652-6026173 FORWARD LENGTH=173	LOC_Os01g18100.1 protein|OsRhmbd3 - Putative Rhomboid homologue, expressed	LOC_Os01g18100.1 protein|OsRhmbd3 - Putative Rhomboid homologue, expressed	LOC_Os01g18100.1 protein|OsRhmbd3 - Putative Rhomboid homologue, expressed
Homoeologous triplet 334	TRIAE_CS42_1AL_TGACv1_000772_AA0018860	TRIAE_CS42_1BL_TGACv1_031952_AA0123290	TRIAE_CS42_1DL_TGACv1_061594_AA0199490	ABD	1	1	1	0.848937	0.944099	0.774871	727	712	727	59	0	72	AT3G09740.1 | Symbols: SYP71, ATSYP71 | syntaxin of plants 71 | chr3:2989615-2991354 FORWARD LENGTH=266	AT3G09740.1 | Symbols: SYP71, ATSYP71 | syntaxin of plants 71 | chr3:2989615-2991354 FORWARD LENGTH=266	AT3G09740.1 | Symbols: SYP71, ATSYP71 | syntaxin of plants 71 | chr3:2989615-2991354 FORWARD LENGTH=266	LOC_Os05g48020.1 protein|SNARE domain containing protein, putative, expressed	LOC_Os05g48020.1 protein|SNARE domain containing protein, putative, expressed	LOC_Os05g48020.1 protein|SNARE domain containing protein, putative, expressed
Homoeologous triplet 335	TRIAE_CS42_1AL_TGACv1_000783_AA0019040	TRIAE_CS42_1BL_TGACv1_030699_AA0098220	TRIAE_CS42_1DL_TGACv1_063874_AA0231410	ABD	7	7	7	0.865944	0.892747	0.882117	402	420	543	100	301	241	AT4G18550.1 | Symbols: | alpha/beta-Hydrolases superfamily protein | chr4:10225006-10226862 REVERSE LENGTH=419	AT4G18550.1 | Symbols: | alpha/beta-Hydrolases superfamily protein | chr4:10225006-10226862 REVERSE LENGTH=419	AT4G18550.1 | Symbols: | alpha/beta-Hydrolases superfamily protein | chr4:10225006-10226862 REVERSE LENGTH=419	LOC_Os05g49840.1 protein|phospholipase, putative, expressed	LOC_Os05g49840.1 protein|phospholipase, putative, expressed	LOC_Os05g49840.1 protein|phospholipase, putative, expressed
Homoeologous triplet 336	TRIAE_CS42_1AL_TGACv1_000787_AA0019070	TRIAE_CS42_1BL_TGACv1_030309_AA0086310	TRIAE_CS42_1DL_TGACv1_061173_AA0187780	ABD	1	1	1	0.928003	0.955392	0.933997	483	449	488	0	1	1	AT2G28380.1 | Symbols: DRB2 | dsRNA-binding protein 2 | chr2:12134098-12135915 REVERSE LENGTH=434	AT2G28380.1 | Symbols: DRB2 | dsRNA-binding protein 2 | chr2:12134098-12135915 REVERSE LENGTH=434	AT2G28380.1 | Symbols: DRB2 | dsRNA-binding protein 2 | chr2:12134098-12135915 REVERSE LENGTH=434	LOC_Os10g33970.2 protein|double-stranded RNA binding motif containing protein, expressed, LOC_Os10g33970.1 protein|double-stranded RNA binding motif containing protein, expressed	LOC_Os10g33970.2 protein|double-stranded RNA binding motif containing protein, expressed, LOC_Os10g33970.1 protein|double-stranded RNA binding motif containing protein, expressed	LOC_Os10g33970.2 protein|double-stranded RNA binding motif containing protein, expressed, LOC_Os10g33970.1 protein|double-stranded RNA binding motif containing protein, expressed
Homoeologous triplet 337	TRIAE_CS42_1AL_TGACv1_000790_AA0019110	TRIAE_CS42_2BL_TGACv1_130304_AA0408490	TRIAE_CS42_2DL_TGACv1_162471_AA0562860	BD-A	1	7	7	0.891711	0.913268	0.927388	706	697	707	4	0	4	AT1G34020.1 | Symbols: | Nucleotide-sugar transporter family protein | chr1:12367359-12368965 FORWARD LENGTH=335	AT1G34020.1 | Symbols: | Nucleotide-sugar transporter family protein | chr1:12367359-12368965 FORWARD LENGTH=335	AT4G09810.1 | Symbols: | Nucleotide-sugar transporter family protein | chr4:6175415-6176892 REVERSE LENGTH=335	LOC_Os02g40090.1 protein|transporter-related, putative, expressed, LOC_Os02g40090.5 protein|transporter-related, putative, expressed, LOC_Os02g40090.4 protein|transporter-related, putative, expressed, LOC_Os02g40090.3 protein|transporter-related, putative, expressed	LOC_Os02g40090.1 protein|transporter-related, putative, expressed, LOC_Os02g40090.5 protein|transporter-related, putative, expressed, LOC_Os02g40090.4 protein|transporter-related, putative, expressed, LOC_Os02g40090.3 protein|transporter-related, putative, expressed	LOC_Os05g12490.1 protein|transporter-related, putative, expressed
Homoeologous triplet 338	TRIAE_CS42_1AL_TGACv1_000794_AA0019260	TRIAE_CS42_1BL_TGACv1_031308_AA0111300	TRIAE_CS42_1DL_TGACv1_062749_AA0219280	ABD	1	1	1	0.750253	0.752509	0.858313	606	635	619	7	12	0	AT2G34900.2 | Symbols: IMB1 | Transcription factor GTE6 | chr2:14723333-14724800 REVERSE LENGTH=276, AT2G34900.1 | Symbols: GTE01, IMB1, GTE1 | Transcription factor GTE6 | chr2:14723333-14725562 REVERSE LENGTH=386	AT2G34900.2 | Symbols: IMB1 | Transcription factor GTE6 | chr2:14723333-14724800 REVERSE LENGTH=276, AT2G34900.1 | Symbols: GTE01, IMB1, GTE1 | Transcription factor GTE6 | chr2:14723333-14725562 REVERSE LENGTH=386	AT2G34900.2 | Symbols: IMB1 | Transcription factor GTE6 | chr2:14723333-14724800 REVERSE LENGTH=276, AT2G34900.1 | Symbols: GTE01, IMB1, GTE1 | Transcription factor GTE6 | chr2:14723333-14725562 REVERSE LENGTH=386	LOC_Os06g04640.1 protein|bromodomain domain containing protein, expressed, LOC_Os06g04640.2 protein|bromodomain domain containing protein, expressed, LOC_Os06g04640.3 protein|bromodomain domain containing protein, expressed	LOC_Os06g04640.1 protein|bromodomain domain containing protein, expressed, LOC_Os06g04640.2 protein|bromodomain domain containing protein, expressed, LOC_Os06g04640.3 protein|bromodomain domain containing protein, expressed	LOC_Os06g04640.1 protein|bromodomain domain containing protein, expressed, LOC_Os06g04640.2 protein|bromodomain domain containing protein, expressed, LOC_Os06g04640.3 protein|bromodomain domain containing protein, expressed
Homoeologous triplet 339	TRIAE_CS42_1AL_TGACv1_000796_AA0019330	TRIAE_CS42_1BL_TGACv1_030456_AA0091200	TRIAE_CS42_1DL_TGACv1_061867_AA0204810	AD-B	1	8	1	0.377827	0.819246	0.737492	124	263	348	149	90	20	AT3G27930.1 | Symbols: | unknown protein; FUNCTIONS IN: molecular_function unknown; INVOLVED IN: N-terminal protein myristoylation; LOCATED IN: cellular_component unknown; EXPRESSED IN: 23 plant structures; EXPRESSED DURING: 14 growth stages; Has 35 Blast hits to 35 proteins in 12 species: Archae - 0; Bacteria - 0; Metazoa - 0; Fungi - 0; Plants - 35; Viruses - 0; Other Eukaryotes - 0 (source: NC…	AT3G27930.1 | Symbols: | unknown protein; FUNCTIONS IN: molecular_function unknown; INVOLVED IN: N-terminal protein myristoylation; LOCATED IN: cellular_component unknown; EXPRESSED IN: 23 plant structures; EXPRESSED DURING: 14 growth stages; Has 35 Blast hits to 35 proteins in 12 species: Archae - 0; Bacteria - 0; Metazoa - 0; Fungi - 0; Plants - 35; Viruses - 0; Other Eukaryotes - 0 (source: NC…	AT3G27930.1 | Symbols: | unknown protein; FUNCTIONS IN: molecular_function unknown; INVOLVED IN: N-terminal protein myristoylation; LOCATED IN: cellular_component unknown; EXPRESSED IN: 23 plant structures; EXPRESSED DURING: 14 growth stages; Has 35 Blast hits to 35 proteins in 12 species: Archae - 0; Bacteria - 0; Metazoa - 0; Fungi - 0; Plants - 35; Viruses - 0; Other Eukaryotes - 0 (source: NC…	LOC_Os05g50200.1 protein|expressed protein, LOC_Os05g50200.2 protein|expressed protein	LOC_Os05g50200.1 protein|expressed protein, LOC_Os05g50200.2 protein|expressed protein	LOC_Os05g50200.1 protein|expressed protein, LOC_Os05g50200.2 protein|expressed protein
Homoeologous triplet 340	TRIAE_CS42_1AL_TGACv1_000803_AA0019420	TRIAE_CS42_1BL_TGACv1_030542_AA0093540	TRIAE_CS42_1DL_TGACv1_061138_AA0186620	ABD	1	1	1	0.864869	0.855803	0.910579	526	354	444	30	12	1	AT1G64600.1 | Symbols: | methyltransferases;copper ion binding | chr1:23995996-23998625 FORWARD LENGTH=537	AT1G64600.1 | Symbols: | methyltransferases;copper ion binding | chr1:23995996-23998625 FORWARD LENGTH=537	AT1G64600.1 | Symbols: | methyltransferases;copper ion binding | chr1:23995996-23998625 FORWARD LENGTH=537	LOC_Os07g20150.1 protein|expressed protein	LOC_Os07g20150.1 protein|expressed protein	LOC_Os07g20150.1 protein|expressed protein
Homoeologous triplet 341	TRIAE_CS42_1AL_TGACv1_000803_AA0019410	TRIAE_CS42_1BL_TGACv1_034454_AA0144570	TRIAE_CS42_1DL_TGACv1_061138_AA0186630	ABD	1	1	1	0.83389	0.778834	0.698655	258	128	516	5	25	107	AT5G63830.1 | Symbols: | HIT-type Zinc finger family protein | chr5:25543585-25544802 REVERSE LENGTH=405	AT5G63830.1 | Symbols: | HIT-type Zinc finger family protein | chr5:25543585-25544802 REVERSE LENGTH=405	AT5G63830.1 | Symbols: | HIT-type Zinc finger family protein | chr5:25543585-25544802 REVERSE LENGTH=405	LOC_Os10g37640.1 protein|HIT zinc finger domain containing protein, expressed, LOC_Os10g37640.2 protein|HIT zinc finger domain containing protein, expressed	LOC_Os10g37640.1 protein|HIT zinc finger domain containing protein, expressed, LOC_Os10g37640.2 protein|HIT zinc finger domain containing protein, expressed	LOC_Os10g37640.1 protein|HIT zinc finger domain containing protein, expressed, LOC_Os10g37640.2 protein|HIT zinc finger domain containing protein, expressed
Homoeologous triplet 342	TRIAE_CS42_1AL_TGACv1_000810_AA0019480	TRIAE_CS42_1BL_TGACv1_033403_AA0139210	TRIAE_CS42_1DL_TGACv1_062511_AA0215660	ABD	1	1	1	0.928159	0.909174	0.918988	686	658	656	0	0	0	AT5G17060.1 | Symbols: ATARFB1B, ARFB1B | ADP-ribosylation factor B1B | chr5:5611056-5612639 FORWARD LENGTH=192	AT5G17060.1 | Symbols: ATARFB1B, ARFB1B | ADP-ribosylation factor B1B | chr5:5611056-5612639 FORWARD LENGTH=192	AT5G17060.1 | Symbols: ATARFB1B, ARFB1B | ADP-ribosylation factor B1B | chr5:5611056-5612639 FORWARD LENGTH=192	LOC_Os10g42940.3 protein|miro, putative, expressed, LOC_Os10g42940.1 protein|miro, putative, expressed, LOC_Os10g42940.4 protein|miro, putative, expressed	LOC_Os10g42940.3 protein|miro, putative, expressed, LOC_Os10g42940.1 protein|miro, putative, expressed, LOC_Os10g42940.4 protein|miro, putative, expressed	LOC_Os10g42940.3 protein|miro, putative, expressed, LOC_Os10g42940.1 protein|miro, putative, expressed, LOC_Os10g42940.4 protein|miro, putative, expressed
Homoeologous triplet 343	TRIAE_CS42_1AL_TGACv1_000810_AA0019510	TRIAE_CS42_1BL_TGACv1_031310_AA0111360	TRIAE_CS42_1DL_TGACv1_062587_AA0216880	ABD	1	1	1	0.905256	0.926169	0.926862	725	724	727	0	0	0	AT5G63610.1 | Symbols: HEN3, CDKE;1, ATCDK8 | cyclin-dependent kinase E;1 | chr5:25463645-25465057 REVERSE LENGTH=470	AT5G63610.1 | Symbols: HEN3, CDKE;1, ATCDK8 | cyclin-dependent kinase E;1 | chr5:25463645-25465057 REVERSE LENGTH=470	AT5G63610.1 | Symbols: HEN3, CDKE;1, ATCDK8 | cyclin-dependent kinase E;1 | chr5:25463645-25465057 REVERSE LENGTH=470	LOC_Os10g42950.4 protein|cyclin-dependent kinase E-1, putative, expressed, LOC_Os10g42950.1 protein|cyclin-dependent kinase E-1, putative, expressed, LOC_Os10g42950.5 protein|cyclin-dependent kinase E-1, putative, expressed, LOC_Os10g42950.3 protein|cyclin-dependent kinase E-1, putative, expressed, LOC_Os10g42950.2 protein|cyclin-dependent kinase E-1, putative, expressed	LOC_Os10g42950.4 protein|cyclin-dependent kinase E-1, putative, expressed, LOC_Os10g42950.1 protein|cyclin-dependent kinase E-1, putative, expressed, LOC_Os10g42950.5 protein|cyclin-dependent kinase E-1, putative, expressed, LOC_Os10g42950.3 protein|cyclin-dependent kinase E-1, putative, expressed, LOC_Os10g42950.2 protein|cyclin-dependent kinase E-1, putative, expressed	LOC_Os10g42950.4 protein|cyclin-dependent kinase E-1, putative, expressed, LOC_Os10g42950.1 protein|cyclin-dependent kinase E-1, putative, expressed, LOC_Os10g42950.5 protein|cyclin-dependent kinase E-1, putative, expressed, LOC_Os10g42950.3 protein|cyclin-dependent kinase E-1, putative, expressed, LOC_Os10g42950.2 protein|cyclin-dependent kinase E-1, putative, expressed
Homoeologous triplet 344	TRIAE_CS42_1AL_TGACv1_000810_AA0019490	TRIAE_CS42_1BL_TGACv1_033403_AA0139200	TRIAE_CS42_1DL_TGACv1_062511_AA0215670	BD-A	2	7	7	0.849005	0.9193	0.888679	505	250	373	271	108	69	AT2G32180.1 | Symbols: PTAC18 | plastid transcriptionally active 18 | chr2:13672362-13672781 REVERSE LENGTH=139	AT2G32650.1 | Symbols: | RmlC-like cupins superfamily protein | chr2:13851547-13851966 FORWARD LENGTH=139, AT2G32650.2 | Symbols: | RmlC-like cupins superfamily protein | chr2:13851547-13851966 FORWARD LENGTH=139	AT2G32650.1 | Symbols: | RmlC-like cupins superfamily protein | chr2:13851547-13851966 FORWARD LENGTH=139, AT2G32650.2 | Symbols: | RmlC-like cupins superfamily protein | chr2:13851547-13851966 FORWARD LENGTH=139	LOC_Os02g54360.1 protein|enzyme of the cupin superfamily protein, putative, expressed	LOC_Os02g54360.1 protein|enzyme of the cupin superfamily protein, putative, expressed	LOC_Os02g54360.1 protein|enzyme of the cupin superfamily protein, putative, expressed
Homoeologous triplet 345	TRIAE_CS42_1AL_TGACv1_000812_AA0019570	TRIAE_CS42_1BL_TGACv1_030726_AA0099270	TRIAE_CS42_1DL_TGACv1_061988_AA0206960	ABD	1	1	1	0.864142	0.837354	0.916954	706	709	698	1	2	1	AT1G25280.1 | Symbols: AtTLP10, TLP10 | tubby like protein 10 | chr1:8864961-8866608 FORWARD LENGTH=445, AT1G25280.2 | Symbols: AtTLP10, TLP10 | tubby like protein 10 | chr1:8865676-8866608 FORWARD LENGTH=267, AT1G25280.3 | Symbols: AtTLP10, TLP10 | tubby like protein 10 | chr1:8865676-8866608 FORWARD LENGTH=267	AT1G25280.1 | Symbols: AtTLP10, TLP10 | tubby like protein 10 | chr1:8864961-8866608 FORWARD LENGTH=445, AT1G25280.2 | Symbols: AtTLP10, TLP10 | tubby like protein 10 | chr1:8865676-8866608 FORWARD LENGTH=267, AT1G25280.3 | Symbols: AtTLP10, TLP10 | tubby like protein 10 | chr1:8865676-8866608 FORWARD LENGTH=267	AT1G25280.1 | Symbols: AtTLP10, TLP10 | tubby like protein 10 | chr1:8864961-8866608 FORWARD LENGTH=445, AT1G25280.2 | Symbols: AtTLP10, TLP10 | tubby like protein 10 | chr1:8865676-8866608 FORWARD LENGTH=267, AT1G25280.3 | Symbols: AtTLP10, TLP10 | tubby like protein 10 | chr1:8865676-8866608 FORWARD LENGTH=267	LOC_Os05g36190.1 protein|OsFBT7 - F-box and tubby domain containing protein, expressed	LOC_Os05g36190.1 protein|OsFBT7 - F-box and tubby domain containing protein, expressed	LOC_Os05g36190.1 protein|OsFBT7 - F-box and tubby domain containing protein, expressed
Homoeologous triplet 346	TRIAE_CS42_1AL_TGACv1_000812_AA0019550	TRIAE_CS42_1BL_TGACv1_031237_AA0110100	TRIAE_CS42_1DL_TGACv1_061988_AA0206970	ABD	1	1	1	0.892052	0.859831	0.872768	679	718	715	0	0	2	AT5G44080.1 | Symbols: | Basic-leucine zipper (bZIP) transcription factor family protein | chr5:17738787-17739734 REVERSE LENGTH=315	AT5G44080.1 | Symbols: | Basic-leucine zipper (bZIP) transcription factor family protein | chr5:17738787-17739734 REVERSE LENGTH=315	AT5G44080.1 | Symbols: | Basic-leucine zipper (bZIP) transcription factor family protein | chr5:17738787-17739734 REVERSE LENGTH=315	LOC_Os05g36160.2 protein|G-box-binding factor 4, putative, expressed, LOC_Os05g36160.1 protein|G-box-binding factor 4, putative, expressed	LOC_Os05g36160.2 protein|G-box-binding factor 4, putative, expressed, LOC_Os05g36160.1 protein|G-box-binding factor 4, putative, expressed	LOC_Os05g36160.2 protein|G-box-binding factor 4, putative, expressed, LOC_Os05g36160.1 protein|G-box-binding factor 4, putative, expressed
Homoeologous triplet 347	TRIAE_CS42_1AL_TGACv1_000815_AA0019700	TRIAE_CS42_1BL_TGACv1_033714_AA0141590	TRIAE_CS42_1DL_TGACv1_063278_AA0225820	AB-D	1	1	9	0.75838	0.645807	0.78289	586	542	550	2	1	1	AT1G27700.1 | Symbols: | Syntaxin/t-SNARE family protein | chr1:9640394-9641752 REVERSE LENGTH=297	AT1G27700.1 | Symbols: | Syntaxin/t-SNARE family protein | chr1:9640394-9641752 REVERSE LENGTH=297	AT1G27700.1 | Symbols: | Syntaxin/t-SNARE family protein | chr1:9640394-9641752 REVERSE LENGTH=297	LOC_Os05g37150.2 protein|syntaxin 6, N-terminal domain containing protein, expressed	LOC_Os05g37150.2 protein|syntaxin 6, N-terminal domain containing protein, expressed	LOC_Os05g37150.2 protein|syntaxin 6, N-terminal domain containing protein, expressed
Homoeologous triplet 348	TRIAE_CS42_1AL_TGACv1_000815_AA0019690	TRIAE_CS42_1BL_TGACv1_033714_AA0141600	TRIAE_CS42_1DL_TGACv1_063278_AA0225810	ABD	5	5	5	0.828689	0.85889	0.926214	588	565	672	7	18	30	AT2G27510.1 | Symbols: ATFD3, FD3 | ferredoxin 3 | chr2:11758281-11758748 REVERSE LENGTH=155	AT2G27510.1 | Symbols: ATFD3, FD3 | ferredoxin 3 | chr2:11758281-11758748 REVERSE LENGTH=155	AT2G27510.1 | Symbols: ATFD3, FD3 | ferredoxin 3 | chr2:11758281-11758748 REVERSE LENGTH=155	LOC_Os05g37140.1 protein|2Fe-2S iron-sulfur cluster binding domain containing protein, expressed, LOC_Os05g37140.2 protein|2Fe-2S iron-sulfur cluster binding domain containing protein, expressed	LOC_Os05g37140.1 protein|2Fe-2S iron-sulfur cluster binding domain containing protein, expressed, LOC_Os05g37140.2 protein|2Fe-2S iron-sulfur cluster binding domain containing protein, expressed	LOC_Os05g37140.1 protein|2Fe-2S iron-sulfur cluster binding domain containing protein, expressed, LOC_Os05g37140.2 protein|2Fe-2S iron-sulfur cluster binding domain containing protein, expressed
Homoeologous triplet 349	TRIAE_CS42_1AL_TGACv1_000825_AA0019830	TRIAE_CS42_1BL_TGACv1_034783_AA0145580	TRIAE_CS42_1DL_TGACv1_062373_AA0213460	A-B-D	2	6	5	0.801027	0.738641	0.751201	423	382	378	20	51	55	AT3G24420.1 | Symbols: | alpha/beta-Hydrolases superfamily protein | chr3:8863111-8864883 REVERSE LENGTH=273	AT3G24420.1 | Symbols: | alpha/beta-Hydrolases superfamily protein | chr3:8863111-8864883 REVERSE LENGTH=273	AT3G24420.1 | Symbols: | alpha/beta-Hydrolases superfamily protein | chr3:8863111-8864883 REVERSE LENGTH=273	LOC_Os05g51240.1 protein|hydrolase, alpha/beta fold family domain containing protein, expressed	LOC_Os05g51240.1 protein|hydrolase, alpha/beta fold family domain containing protein, expressed	LOC_Os05g51240.1 protein|hydrolase, alpha/beta fold family domain containing protein, expressed
Homoeologous triplet 350	TRIAE_CS42_1AL_TGACv1_000841_AA0020150	TRIAE_CS42_1BL_TGACv1_030884_AA0102990	TRIAE_CS42_1DL_TGACv1_061906_AA0205480	AB-D	1	1	8	0.846639	0.882704	0.930434	375	555	385	43	1	19	AT1G22970.1 | Symbols: | unknown protein; BEST Arabidopsis thaliana protein match is: unknown protein (TAIR:AT1G71150.1); Has 134 Blast hits to 132 proteins in 48 species: Archae - 0; Bacteria - 0; Metazoa - 66; Fungi - 10; Plants - 48; Viruses - 0; Other Eukaryotes - 10 (source: NCBI BLink). | chr1:8130840-8132199 REVERSE LENGTH=357	AT1G22970.1 | Symbols: | unknown protein; BEST Arabidopsis thaliana protein match is: unknown protein (TAIR:AT1G71150.1); Has 134 Blast hits to 132 proteins in 48 species: Archae - 0; Bacteria - 0; Metazoa - 66; Fungi - 10; Plants - 48; Viruses - 0; Other Eukaryotes - 10 (source: NCBI BLink). | chr1:8130840-8132199 REVERSE LENGTH=357	AT1G22970.1 | Symbols: | unknown protein; BEST Arabidopsis thaliana protein match is: unknown protein (TAIR:AT1G71150.1); Has 134 Blast hits to 132 proteins in 48 species: Archae - 0; Bacteria - 0; Metazoa - 66; Fungi - 10; Plants - 48; Viruses - 0; Other Eukaryotes - 10 (source: NCBI BLink). | chr1:8130840-8132199 REVERSE LENGTH=357	LOC_Os05g48070.1 protein|expressed protein	LOC_Os05g48070.1 protein|expressed protein	LOC_Os05g48070.1 protein|expressed protein
Homoeologous triplet 351	TRIAE_CS42_1AL_TGACv1_000844_AA0020240	TRIAE_CS42_1BL_TGACv1_031377_AA0112840	TRIAE_CS42_1DL_TGACv1_062518_AA0215770	ABD	1	1	1	0.903163	0.93642	0.907804	727	727	727	0	0	0	AT3G57870.1 | Symbols: AHUS5, EMB1637, SCE1, SCE1A, ATSCE1 | sumo conjugation enzyme 1 | chr3:21428831-21430110 REVERSE LENGTH=160	AT3G57870.1 | Symbols: AHUS5, EMB1637, SCE1, SCE1A, ATSCE1 | sumo conjugation enzyme 1 | chr3:21428831-21430110 REVERSE LENGTH=160	AT3G57870.1 | Symbols: AHUS5, EMB1637, SCE1, SCE1A, ATSCE1 | sumo conjugation enzyme 1 | chr3:21428831-21430110 REVERSE LENGTH=160	LOC_Os03g03130.2 protein|ubiquitin-conjugating enzyme, putative, expressed, LOC_Os03g03130.1 protein|ubiquitin-conjugating enzyme, putative, expressed	LOC_Os03g03130.2 protein|ubiquitin-conjugating enzyme, putative, expressed, LOC_Os03g03130.1 protein|ubiquitin-conjugating enzyme, putative, expressed	LOC_Os03g03130.2 protein|ubiquitin-conjugating enzyme, putative, expressed, LOC_Os03g03130.1 protein|ubiquitin-conjugating enzyme, putative, expressed
Homoeologous triplet 352	TRIAE_CS42_1AL_TGACv1_000846_AA0020300	TRIAE_CS42_1BL_TGACv1_030614_AA0095810	TRIAE_CS42_1DL_TGACv1_062016_AA0207420	AD-B	1	4	1	0.816732	0.826205	0.722788	630	452	492	8	2	8	AT2G42080.1 | Symbols: | Chaperone DnaJ-domain superfamily protein | chr2:17553409-17555475 REVERSE LENGTH=263	AT2G42080.1 | Symbols: | Chaperone DnaJ-domain superfamily protein | chr2:17553409-17555475 REVERSE LENGTH=263	AT2G42080.1 | Symbols: | Chaperone DnaJ-domain superfamily protein | chr2:17553409-17555475 REVERSE LENGTH=263	LOC_Os07g28800.1 protein|heat shock protein DnaJ, putative, expressed	LOC_Os07g28800.1 protein|heat shock protein DnaJ, putative, expressed	LOC_Os07g28800.1 protein|heat shock protein DnaJ, putative, expressed
Homoeologous triplet 353	TRIAE_CS42_1AL_TGACv1_000848_AA0020320	TRIAE_CS42_1BL_TGACv1_032402_AA0129480	TRIAE_CS42_1DL_TGACv1_061890_AA0205300	ABD	8	8	8	0.752881	0.422722	0.805523	27	79	73	64	61	25	AT2G40170.1 | Symbols: ATEM6, GEA6, EM6 | Stress induced protein | chr2:16779792-16780167 REVERSE LENGTH=92	AT2G40170.1 | Symbols: ATEM6, GEA6, EM6 | Stress induced protein | chr2:16779792-16780167 REVERSE LENGTH=92	AT2G40170.1 | Symbols: ATEM6, GEA6, EM6 | Stress induced protein | chr2:16779792-16780167 REVERSE LENGTH=92	LOC_Os05g28210.1 protein|small hydrophilic plant seed protein, putative, expressed	LOC_Os05g28210.1 protein|small hydrophilic plant seed protein, putative, expressed	LOC_Os05g28210.1 protein|small hydrophilic plant seed protein, putative, expressed
Homoeologous triplet 354	TRIAE_CS42_1AL_TGACv1_000853_AA0020390	TRIAE_CS42_1BL_TGACv1_031299_AA0111060	TRIAE_CS42_1DL_TGACv1_061521_AA0197680	ABD	7	7	7	0.878012	0.881833	0.879745	333	480	470	330	288	63	AT1G14220.1 | Symbols: | Ribonuclease T2 family protein | chr1:4858642-4859601 REVERSE LENGTH=228	AT1G14220.1 | Symbols: | Ribonuclease T2 family protein | chr1:4858642-4859601 REVERSE LENGTH=228	AT1G14220.1 | Symbols: | Ribonuclease T2 family protein | chr1:4858642-4859601 REVERSE LENGTH=228	LOC_Os09g36700.1 protein|ribonuclease T2 family domain containing protein, expressed	LOC_Os09g36700.1 protein|ribonuclease T2 family domain containing protein, expressed	LOC_Os09g36700.1 protein|ribonuclease T2 family domain containing protein, expressed
Homoeologous triplet 355	TRIAE_CS42_1AL_TGACv1_000858_AA0020510	TRIAE_CS42_1BL_TGACv1_033596_AA0140540	TRIAE_CS42_1DL_TGACv1_062131_AA0209180	AB-D	6	6	2	0.818477	0.767152	0.686205	553	616	620	0	1	3	AT3G59280.1 | Symbols: TXR1 | Protein Transporter, Pam16 | chr3:21909266-21910519 REVERSE LENGTH=116	AT3G59280.1 | Symbols: TXR1 | Protein Transporter, Pam16 | chr3:21909266-21910519 REVERSE LENGTH=116	AT3G59280.1 | Symbols: TXR1 | Protein Transporter, Pam16 | chr3:21909266-21910519 REVERSE LENGTH=116	LOC_Os10g33910.1 protein|mitochondrial import inner membrane translocase subunit Tim16, putative, expressed	LOC_Os10g33910.1 protein|mitochondrial import inner membrane translocase subunit Tim16, putative, expressed	LOC_Os10g33910.1 protein|mitochondrial import inner membrane translocase subunit Tim16, putative, expressed
Homoeologous triplet 356	TRIAE_CS42_1AL_TGACv1_000860_AA0020560	TRIAE_CS42_1BL_TGACv1_031639_AA0117690	TRIAE_CS42_1DL_TGACv1_061596_AA0199520	ABD	1	1	1	0.822966	0.90284	0.670837	412	423	269	252	199	204	AT1G02205.1 | Symbols: CER1 | Fatty acid hydroxylase superfamily | chr1:419650-422154 FORWARD LENGTH=461, AT1G02205.2 | Symbols: CER1 | Fatty acid hydroxylase superfamily | chr1:418818-422154 FORWARD LENGTH=625, AT1G02205.3 | Symbols: CER1 | Fatty acid hydroxylase superfamily | chr1:418818-422154 FORWARD LENGTH=630	AT1G02205.1 | Symbols: CER1 | Fatty acid hydroxylase superfamily | chr1:419650-422154 FORWARD LENGTH=461, AT1G02205.2 | Symbols: CER1 | Fatty acid hydroxylase superfamily | chr1:418818-422154 FORWARD LENGTH=625, AT1G02205.3 | Symbols: CER1 | Fatty acid hydroxylase superfamily | chr1:418818-422154 FORWARD LENGTH=630	AT1G02205.1 | Symbols: CER1 | Fatty acid hydroxylase superfamily | chr1:419650-422154 FORWARD LENGTH=461, AT1G02205.2 | Symbols: CER1 | Fatty acid hydroxylase superfamily | chr1:418818-422154 FORWARD LENGTH=625, AT1G02205.3 | Symbols: CER1 | Fatty acid hydroxylase superfamily | chr1:418818-422154 FORWARD LENGTH=630	LOC_Os10g33250.1 protein|WAX2, putative, expressed, LOC_Os10g33250.2 protein|WAX2, putative, expressed, LOC_Os10g33250.3 protein|WAX2, putative, expressed	LOC_Os10g33250.1 protein|WAX2, putative, expressed, LOC_Os10g33250.2 protein|WAX2, putative, expressed, LOC_Os10g33250.3 protein|WAX2, putative, expressed	LOC_Os10g33250.1 protein|WAX2, putative, expressed, LOC_Os10g33250.2 protein|WAX2, putative, expressed, LOC_Os10g33250.3 protein|WAX2, putative, expressed
Homoeologous triplet 357	TRIAE_CS42_1AL_TGACv1_000861_AA0020630	TRIAE_CS42_1BL_TGACv1_033602_AA0140600	TRIAE_CS42_1DL_TGACv1_061059_AA0183420	ABD	7	7	7	0.904414	0.92508	0.905806	508	666	585	22	5	17	AT3G12780.1 | Symbols: PGK1 | phosphoglycerate kinase 1 | chr3:4061127-4063140 REVERSE LENGTH=481	AT1G56190.1 | Symbols: | Phosphoglycerate kinase family protein | chr1:21028403-21030454 FORWARD LENGTH=478, AT1G56190.2 | Symbols: | Phosphoglycerate kinase family protein | chr1:21028622-21030454 FORWARD LENGTH=405	AT3G12780.1 | Symbols: PGK1 | phosphoglycerate kinase 1 | chr3:4061127-4063140 REVERSE LENGTH=481	LOC_Os10g30550.1 protein|tRNA methyltransferase, putative, expressed	LOC_Os10g30550.1 protein|tRNA methyltransferase, putative, expressed	LOC_Os10g30550.1 protein|tRNA methyltransferase, putative, expressed
Homoeologous triplet 358	TRIAE_CS42_1AL_TGACv1_000868_AA0020680	TRIAE_CS42_1BL_TGACv1_033617_AA0140650	TRIAE_CS42_1DL_TGACv1_062027_AA0207710	AB-D	1	1	6	0.938693	0.923741	0.889971	714	710	698	0	2	4	AT5G47390.1 | Symbols: | myb-like transcription factor family protein | chr5:19227001-19228546 FORWARD LENGTH=365	AT5G47390.1 | Symbols: | myb-like transcription factor family protein | chr5:19227001-19228546 FORWARD LENGTH=365	AT5G47390.1 | Symbols: | myb-like transcription factor family protein | chr5:19227001-19228546 FORWARD LENGTH=365	LOC_Os10g41200.3 protein|MYB family transcription factor, putative, expressed, LOC_Os10g41200.1 protein|MYB family transcription factor, putative, expressed, LOC_Os10g41200.2 protein|MYB family transcription factor, putative, expressed	LOC_Os10g41200.3 protein|MYB family transcription factor, putative, expressed, LOC_Os10g41200.1 protein|MYB family transcription factor, putative, expressed, LOC_Os10g41200.2 protein|MYB family transcription factor, putative, expressed	LOC_Os10g41200.3 protein|MYB family transcription factor, putative, expressed, LOC_Os10g41200.1 protein|MYB family transcription factor, putative, expressed, LOC_Os10g41200.2 protein|MYB family transcription factor, putative, expressed
Homoeologous triplet 359	TRIAE_CS42_1AL_TGACv1_000871_AA0020720	TRIAE_CS42_1BL_TGACv1_030345_AA0087540	TRIAE_CS42_1DL_TGACv1_061238_AA0189620	ABD	2	2	2	0.964009	0.959863	0.984121	450	627	499	194	3	129	AT2G21385.1 | Symbols: | unknown protein; FUNCTIONS IN: molecular_function unknown; INVOLVED IN: biological_process unknown; LOCATED IN: chloroplast, chloroplast envelope; EXPRESSED IN: 22 plant structures; EXPRESSED DURING: 13 growth stages; Has 49 Blast hits to 49 proteins in 20 species: Archae - 0; Bacteria - 0; Metazoa - 0; Fungi - 0; Plants - 44; Viruses - 0; Other Eukaryotes - 5 (source: NC…	AT2G21385.1 | Symbols: | unknown protein; FUNCTIONS IN: molecular_function unknown; INVOLVED IN: biological_process unknown; LOCATED IN: chloroplast, chloroplast envelope; EXPRESSED IN: 22 plant structures; EXPRESSED DURING: 13 growth stages; Has 49 Blast hits to 49 proteins in 20 species: Archae - 0; Bacteria - 0; Metazoa - 0; Fungi - 0; Plants - 44; Viruses - 0; Other Eukaryotes - 5 (source: NC…	AT2G21385.1 | Symbols: | unknown protein; FUNCTIONS IN: molecular_function unknown; INVOLVED IN: biological_process unknown; LOCATED IN: chloroplast, chloroplast envelope; EXPRESSED IN: 22 plant structures; EXPRESSED DURING: 13 growth stages; Has 49 Blast hits to 49 proteins in 20 species: Archae - 0; Bacteria - 0; Metazoa - 0; Fungi - 0; Plants - 44; Viruses - 0; Other Eukaryotes - 5 (source: NC…	LOC_Os09g36130.1 protein|expressed protein	LOC_Os09g36130.1 protein|expressed protein	LOC_Os09g36130.1 protein|expressed protein
Homoeologous triplet 360	TRIAE_CS42_1AL_TGACv1_000872_AA0020740	TRIAE_CS42_1BL_TGACv1_032305_AA0128230	TRIAE_CS42_1DL_TGACv1_062056_AA0208130	AD-B	5	0	5	0.789991	0.804731	0.89722	76	91	81	22	17	1	AT5G62740.1 | Symbols: HIR1, ATHIR1 | SPFH/Band 7/PHB domain-containing membrane-associated protein family | chr5:25201320-25202535 FORWARD LENGTH=286	AT5G62740.1 | Symbols: HIR1, ATHIR1 | SPFH/Band 7/PHB domain-containing membrane-associated protein family | chr5:25201320-25202535 FORWARD LENGTH=286	AT5G62740.1 | Symbols: HIR1, ATHIR1 | SPFH/Band 7/PHB domain-containing membrane-associated protein family | chr5:25201320-25202535 FORWARD LENGTH=286	LOC_Os10g32700.1 protein|hypersensitive-induced response protein, putative, expressed	LOC_Os10g32700.1 protein|hypersensitive-induced response protein, putative, expressed	LOC_Os10g32700.1 protein|hypersensitive-induced response protein, putative, expressed
Homoeologous triplet 361	TRIAE_CS42_1AL_TGACv1_000874_AA0020800	TRIAE_CS42_1BL_TGACv1_031703_AA0119250	TRIAE_CS42_1DL_TGACv1_061525_AA0197740	ABD	4	4	4	0.955307	0.965811	0.978316	373	385	375	53	13	19	AT2G02040.1 | Symbols: ATPTR2-B, NTR1, PTR2-B, PTR2, ATPTR2 | peptide transporter 2 | chr2:487542-489707 FORWARD LENGTH=585	AT3G54140.1 | Symbols: ATPTR1, PTR1 | peptide transporter 1 | chr3:20045885-20048154 REVERSE LENGTH=570	AT3G54140.1 | Symbols: ATPTR1, PTR1 | peptide transporter 1 | chr3:20045885-20048154 REVERSE LENGTH=570	LOC_Os10g42900.1 protein|peptide transporter PTR2, putative, expressed	LOC_Os10g42900.1 protein|peptide transporter PTR2, putative, expressed	LOC_Os10g42900.1 protein|peptide transporter PTR2, putative, expressed
Homoeologous triplet 362	TRIAE_CS42_1AL_TGACv1_000878_AA0020870	TRIAE_CS42_1BL_TGACv1_031149_AA0108710	TRIAE_CS42_1DL_TGACv1_062777_AA0219680	ABD	7	7	7	0.972835	0.970376	0.952627	460	568	453	37	2	109	AT4G32700.2 | Symbols: | helicases;ATP-dependent helicases;nucleic acid binding;ATP binding;DNA-directed DNA polymerases;DNA binding | chr4:15767440-15779185 FORWARD LENGTH=2154	AT4G32700.2 | Symbols: | helicases;ATP-dependent helicases;nucleic acid binding;ATP binding;DNA-directed DNA polymerases;DNA binding | chr4:15767440-15779185 FORWARD LENGTH=2154	AT4G32700.2 | Symbols: | helicases;ATP-dependent helicases;nucleic acid binding;ATP binding;DNA-directed DNA polymerases;DNA binding | chr4:15767440-15779185 FORWARD LENGTH=2154	LOC_Os12g19370.1 protein|DNA polymerase I family protein, expressed	LOC_Os12g19370.1 protein|DNA polymerase I family protein, expressed	LOC_Os12g19370.1 protein|DNA polymerase I family protein, expressed
Homoeologous triplet 363	TRIAE_CS42_1AL_TGACv1_000879_AA0020900	TRIAE_CS42_1BL_TGACv1_031537_AA0115800	TRIAE_CS42_1DL_TGACv1_061422_AA0194810	ABD	1	1	1	0.808746	0.644924	0.515444	518	666	614	65	87	102	AT3G59110.1 | Symbols: | Protein kinase superfamily protein | chr3:21855673-21857847 FORWARD LENGTH=512	AT3G59110.1 | Symbols: | Protein kinase superfamily protein | chr3:21855673-21857847 FORWARD LENGTH=512	AT3G59110.1 | Symbols: | Protein kinase superfamily protein | chr3:21855673-21857847 FORWARD LENGTH=512	LOC_Os10g35450.1 protein|serine/threonine-protein kinase, putative, expressed	LOC_Os10g35450.1 protein|serine/threonine-protein kinase, putative, expressed	LOC_Os10g35450.1 protein|serine/threonine-protein kinase, putative, expressed
Homoeologous triplet 364	TRIAE_CS42_1AL_TGACv1_000879_AA0020920	TRIAE_CS42_1BL_TGACv1_031537_AA0115770	TRIAE_CS42_1DL_TGACv1_061422_AA0194780	AD-B	6	15	6	0.787695	0.804068	0.619842	586	668	555	17	52	101	AT1G33490.1 | Symbols: | unknown protein; CONTAINS InterPro DOMAIN/s: Protein of unknown function DUF2062 (InterPro:IPR018639); BEST Arabidopsis thaliana protein match is: unknown protein (TAIR:AT4G10140.1); Has 88 Blast hits to 88 proteins in 29 species: Archae - 0; Bacteria - 28; Metazoa - 0; Fungi - 0; Plants - 54; Viruses - 0; Other Eukaryotes - 6 (source: NCBI BLink). | chr1:12150941-1215227…	AT1G33490.1 | Symbols: | unknown protein; CONTAINS InterPro DOMAIN/s: Protein of unknown function DUF2062 (InterPro:IPR018639); BEST Arabidopsis thaliana protein match is: unknown protein (TAIR:AT4G10140.1); Has 88 Blast hits to 88 proteins in 29 species: Archae - 0; Bacteria - 28; Metazoa - 0; Fungi - 0; Plants - 54; Viruses - 0; Other Eukaryotes - 6 (source: NCBI BLink). | chr1:12150941-1215227…	AT1G33490.1 | Symbols: | unknown protein; CONTAINS InterPro DOMAIN/s: Protein of unknown function DUF2062 (InterPro:IPR018639); BEST Arabidopsis thaliana protein match is: unknown protein (TAIR:AT4G10140.1); Has 88 Blast hits to 88 proteins in 29 species: Archae - 0; Bacteria - 28; Metazoa - 0; Fungi - 0; Plants - 54; Viruses - 0; Other Eukaryotes - 6 (source: NCBI BLink). | chr1:12150941-1215227…	LOC_Os05g01510.1 protein|cytoplasmic membrane protein, putative, expressed, LOC_Os05g01510.2 protein|cytoplasmic membrane protein, putative, expressed	LOC_Os05g01510.1 protein|cytoplasmic membrane protein, putative, expressed, LOC_Os05g01510.2 protein|cytoplasmic membrane protein, putative, expressed	LOC_Os05g01510.1 protein|cytoplasmic membrane protein, putative, expressed, LOC_Os05g01510.2 protein|cytoplasmic membrane protein, putative, expressed
Homoeologous triplet 365	TRIAE_CS42_1AL_TGACv1_000880_AA0020950	TRIAE_CS42_1BL_TGACv1_032860_AA0134860	TRIAE_CS42_1DL_TGACv1_063075_AA0223630	BD-A	10	3	3	0.966807	0.937901	0.938379	723	717	708	1	19	1	AT5G04500.1 | Symbols: | glycosyltransferase family protein 47 | chr5:1283604-1286155 FORWARD LENGTH=765	AT5G04500.1 | Symbols: | glycosyltransferase family protein 47 | chr5:1283604-1286155 FORWARD LENGTH=765	AT5G04500.1 | Symbols: | glycosyltransferase family protein 47 | chr5:1283604-1286155 FORWARD LENGTH=765	LOC_Os05g46260.1 protein|exostosin, putative, expressed	LOC_Os05g46260.1 protein|exostosin, putative, expressed	LOC_Os05g46260.1 protein|exostosin, putative, expressed
Homoeologous triplet 366	TRIAE_CS42_1AL_TGACv1_000880_AA0020980	TRIAE_CS42_1BL_TGACv1_032860_AA0134890	TRIAE_CS42_1DL_TGACv1_063075_AA0223600	ABD	1	1	1	0.929315	0.93003	0.895577	407	501	421	60	3	36	AT3G13860.1 | Symbols: HSP60-3A | heat shock protein 60-3A | chr3:4561704-4565133 REVERSE LENGTH=572	AT3G13860.1 | Symbols: HSP60-3A | heat shock protein 60-3A | chr3:4561704-4565133 REVERSE LENGTH=572	AT3G13860.1 | Symbols: HSP60-3A | heat shock protein 60-3A | chr3:4561704-4565133 REVERSE LENGTH=572	LOC_Os05g46290.1 protein|T-complex protein, putative, expressed	LOC_Os05g46290.1 protein|T-complex protein, putative, expressed	LOC_Os05g46290.1 protein|T-complex protein, putative, expressed
Homoeologous triplet 367	TRIAE_CS42_1AL_TGACv1_000880_AA0020960	TRIAE_CS42_1BL_TGACv1_032860_AA0134870	TRIAE_CS42_1DL_TGACv1_063075_AA0223620	ABD	1	1	1	0.929897	0.921095	0.945648	415	484	477	4	10	0	AT5G26680.1 | Symbols: | 5'-3' exonuclease family protein | chr5:9311882-9315458 REVERSE LENGTH=453, AT5G26680.2 | Symbols: | 5'-3' exonuclease family protein | chr5:9311882-9315458 REVERSE LENGTH=383	AT5G26680.1 | Symbols: | 5'-3' exonuclease family protein | chr5:9311882-9315458 REVERSE LENGTH=453, AT5G26680.2 | Symbols: | 5'-3' exonuclease family protein | chr5:9311882-9315458 REVERSE LENGTH=383	AT5G26680.1 | Symbols: | 5'-3' exonuclease family protein | chr5:9311882-9315458 REVERSE LENGTH=453, AT5G26680.2 | Symbols: | 5'-3' exonuclease family protein | chr5:9311882-9315458 REVERSE LENGTH=383	LOC_Os05g46270.1 protein|FEN1A - Putative flap endonuclease protein, expressed	LOC_Os05g46270.1 protein|FEN1A - Putative flap endonuclease protein, expressed	LOC_Os05g46270.1 protein|FEN1A - Putative flap endonuclease protein, expressed
Homoeologous triplet 368	TRIAE_CS42_1AL_TGACv1_000880_AA0020970	TRIAE_CS42_1BL_TGACv1_032860_AA0134880	TRIAE_CS42_1DL_TGACv1_063075_AA0223610	ABD	1	1	1	0.876467	0.799114	0.791746	402	441	160	6	53	64	AT4G29660.1 | Symbols: EMB2752 | embryo defective 2752 | chr4:14534495-14535171 REVERSE LENGTH=103	AT4G29660.1 | Symbols: EMB2752 | embryo defective 2752 | chr4:14534495-14535171 REVERSE LENGTH=103	AT4G29660.1 | Symbols: EMB2752 | embryo defective 2752 | chr4:14534495-14535171 REVERSE LENGTH=103	LOC_Os05g46280.1 protein|expressed protein	LOC_Os05g46280.1 protein|expressed protein	LOC_Os05g46280.1 protein|expressed protein
Homoeologous triplet 369	TRIAE_CS42_1AL_TGACv1_000883_AA0021000	TRIAE_CS42_1BL_TGACv1_030337_AA0087310	TRIAE_CS42_1DL_TGACv1_061100_AA0185100	BD-A	1	8	8	0.729235	0.74103	0.934218	608	727	727	310	369	0	AT5G19330.1 | Symbols: ARIA | ARM repeat protein interacting with ABF2 | chr5:6508095-6512701 REVERSE LENGTH=710, AT5G19330.2 | Symbols: ARIA | ARM repeat protein interacting with ABF2 | chr5:6508300-6512701 REVERSE LENGTH=636	AT5G19330.1 | Symbols: ARIA | ARM repeat protein interacting with ABF2 | chr5:6508095-6512701 REVERSE LENGTH=710, AT5G19330.2 | Symbols: ARIA | ARM repeat protein interacting with ABF2 | chr5:6508300-6512701 REVERSE LENGTH=636	AT5G19330.1 | Symbols: ARIA | ARM repeat protein interacting with ABF2 | chr5:6508095-6512701 REVERSE LENGTH=710, AT5G19330.2 | Symbols: ARIA | ARM repeat protein interacting with ABF2 | chr5:6508300-6512701 REVERSE LENGTH=636	LOC_Os05g33050.1 protein|ABTB1 - Armadillo repeats with a Bric-a-Brac, Tramtrack, Broad Complex BTB domain, expressed	LOC_Os05g33050.1 protein|ABTB1 - Armadillo repeats with a Bric-a-Brac, Tramtrack, Broad Complex BTB domain, expressed	LOC_Os05g33050.1 protein|ABTB1 - Armadillo repeats with a Bric-a-Brac, Tramtrack, Broad Complex BTB domain, expressed
Homoeologous triplet 370	TRIAE_CS42_1AL_TGACv1_000885_AA0021070	TRIAE_CS42_1BL_TGACv1_030385_AA0088950	TRIAE_CS42_1DL_TGACv1_062903_AA0221570	ABD	3	3	3	0.922508	0.966607	0.921467	456	514	419	18	8	20	AT1G79620.1 | Symbols: | Leucine-rich repeat protein kinase family protein | chr1:29957633-29962174 REVERSE LENGTH=971	AT1G79620.1 | Symbols: | Leucine-rich repeat protein kinase family protein | chr1:29957633-29962174 REVERSE LENGTH=971	AT1G79620.1 | Symbols: | Leucine-rich repeat protein kinase family protein | chr1:29957633-29962174 REVERSE LENGTH=971	LOC_Os05g40770.2 protein|leucine-rich repeat family protein, putative, expressed, LOC_Os05g40770.1 protein|leucine-rich repeat family protein, putative, expressed	LOC_Os05g40770.2 protein|leucine-rich repeat family protein, putative, expressed, LOC_Os05g40770.1 protein|leucine-rich repeat family protein, putative, expressed	LOC_Os05g40770.2 protein|leucine-rich repeat family protein, putative, expressed, LOC_Os05g40770.1 protein|leucine-rich repeat family protein, putative, expressed
Homoeologous triplet 371	TRIAE_CS42_1AL_TGACv1_000885_AA0021080	TRIAE_CS42_1BL_TGACv1_032360_AA0128900	TRIAE_CS42_1DL_TGACv1_061622_AA0200210	ABD	4	4	4	0.996964	0.99725	0.997343	85	83	83	2	0	0	AT3G13400.1 | Symbols: sks13 | SKU5 similar 13 | chr3:4355257-4357305 FORWARD LENGTH=551	AT3G13400.1 | Symbols: sks13 | SKU5 similar 13 | chr3:4355257-4357305 FORWARD LENGTH=551	AT3G13400.1 | Symbols: sks13 | SKU5 similar 13 | chr3:4355257-4357305 FORWARD LENGTH=551	LOC_Os05g40740.1 protein|monocopper oxidase, putative, expressed, LOC_Os05g40740.2 protein|monocopper oxidase, putative, expressed, LOC_Os05g40740.4 protein|monocopper oxidase, putative, expressed, LOC_Os05g40740.3 protein|monocopper oxidase, putative, expressed	LOC_Os05g40740.1 protein|monocopper oxidase, putative, expressed, LOC_Os05g40740.2 protein|monocopper oxidase, putative, expressed, LOC_Os05g40740.4 protein|monocopper oxidase, putative, expressed, LOC_Os05g40740.3 protein|monocopper oxidase, putative, expressed	LOC_Os05g40740.1 protein|monocopper oxidase, putative, expressed, LOC_Os05g40740.2 protein|monocopper oxidase, putative, expressed, LOC_Os05g40740.4 protein|monocopper oxidase, putative, expressed, LOC_Os05g40740.3 protein|monocopper oxidase, putative, expressed
Homoeologous triplet 372	TRIAE_CS42_1AL_TGACv1_000885_AA0021060	TRIAE_CS42_1BL_TGACv1_030385_AA0088940	TRIAE_CS42_1DL_TGACv1_062903_AA0221560	ABD	1	1	1	0.893795	0.873864	0.923238	532	558	529	2	3	0	AT1G77350.1 | Symbols: | unknown protein; FUNCTIONS IN: molecular_function unknown; INVOLVED IN: biological_process unknown; LOCATED IN: endomembrane system; EXPRESSED IN: 23 plant structures; EXPRESSED DURING: 13 growth stages; CONTAINS InterPro DOMAIN/s: Protein of unknown function KRTCAP2 (InterPro:IPR018614); Has 141 Blast hits to 141 proteins in 57 species: Archae - 0; Bacteria - 0; Metazoa …	AT1G77350.1 | Symbols: | unknown protein; FUNCTIONS IN: molecular_function unknown; INVOLVED IN: biological_process unknown; LOCATED IN: endomembrane system; EXPRESSED IN: 23 plant structures; EXPRESSED DURING: 13 growth stages; CONTAINS InterPro DOMAIN/s: Protein of unknown function KRTCAP2 (InterPro:IPR018614); Has 141 Blast hits to 141 proteins in 57 species: Archae - 0; Bacteria - 0; Metazoa …	AT1G77350.1 | Symbols: | unknown protein; FUNCTIONS IN: molecular_function unknown; INVOLVED IN: biological_process unknown; LOCATED IN: endomembrane system; EXPRESSED IN: 23 plant structures; EXPRESSED DURING: 13 growth stages; CONTAINS InterPro DOMAIN/s: Protein of unknown function KRTCAP2 (InterPro:IPR018614); Has 141 Blast hits to 141 proteins in 57 species: Archae - 0; Bacteria - 0; Metazoa …	LOC_Os05g40780.1 protein|keratinocytes-associated protein 2, putative, expressed	LOC_Os05g40780.1 protein|keratinocytes-associated protein 2, putative, expressed	LOC_Os05g40780.1 protein|keratinocytes-associated protein 2, putative, expressed
Homoeologous triplet 373	TRIAE_CS42_1AL_TGACv1_000886_AA0021120	TRIAE_CS42_1BL_TGACv1_030333_AA0087170	TRIAE_CS42_1DL_TGACv1_064943_AA0236300	ABD	7	7	7	0.902993	0.918337	0.860248	151	211	198	21	5	18	AT1G54820.1 | Symbols: | Protein kinase superfamily protein | chr1:20447370-20450761 FORWARD LENGTH=458	AT1G54820.1 | Symbols: | Protein kinase superfamily protein | chr1:20447370-20450761 FORWARD LENGTH=458	AT1G54820.1 | Symbols: | Protein kinase superfamily protein | chr1:20447370-20450761 FORWARD LENGTH=458	LOC_Os05g33080.1 protein|serine/threonine-protein kinase, putative, expressed	LOC_Os05g33080.1 protein|serine/threonine-protein kinase, putative, expressed	LOC_Os05g33080.1 protein|serine/threonine-protein kinase, putative, expressed
Homoeologous triplet 374	TRIAE_CS42_1AL_TGACv1_000886_AA0021110	TRIAE_CS42_1BL_TGACv1_030333_AA0087160	TRIAE_CS42_1DL_TGACv1_061296_AA0191610	AB-D	7	7	2	0.792954	0.861584	0.901257	711	706	676	15	74	79	AT3G23600.1 | Symbols: | alpha/beta-Hydrolases superfamily protein | chr3:8473833-8475655 FORWARD LENGTH=239, AT3G23600.2 | Symbols: | alpha/beta-Hydrolases superfamily protein | chr3:8473833-8475655 FORWARD LENGTH=236	AT3G23600.1 | Symbols: | alpha/beta-Hydrolases superfamily protein | chr3:8473833-8475655 FORWARD LENGTH=239, AT3G23600.2 | Symbols: | alpha/beta-Hydrolases superfamily protein | chr3:8473833-8475655 FORWARD LENGTH=236	AT3G23600.1 | Symbols: | alpha/beta-Hydrolases superfamily protein | chr3:8473833-8475655 FORWARD LENGTH=239, AT3G23600.2 | Symbols: | alpha/beta-Hydrolases superfamily protein | chr3:8473833-8475655 FORWARD LENGTH=236	LOC_Os05g33100.1 protein|endo-1,3;1,4-beta-D-glucanase precursor, putative, expressed	LOC_Os05g33100.1 protein|endo-1,3;1,4-beta-D-glucanase precursor, putative, expressed	LOC_Os05g33100.1 protein|endo-1,3;1,4-beta-D-glucanase precursor, putative, expressed
Homoeologous triplet 375	TRIAE_CS42_1AL_TGACv1_000888_AA0021140	TRIAE_CS42_1BL_TGACv1_034673_AA0145270	TRIAE_CS42_1DL_TGACv1_061200_AA0188550	AD-B	2	7	2	0.494899	0.619508	0.666812	432	357	527	309	412	408	AT2G02990.1 | Symbols: RNS1, ATRNS1 | ribonuclease 1 | chr2:873714-874667 FORWARD LENGTH=230	AT2G02990.1 | Symbols: RNS1, ATRNS1 | ribonuclease 1 | chr2:873714-874667 FORWARD LENGTH=230	AT1G26820.1 | Symbols: RNS3 | ribonuclease 3 | chr1:9292760-9293722 REVERSE LENGTH=222	LOC_Os09g36680.1 protein|ribonuclease T2 family domain containing protein, expressed	LOC_Os09g36680.1 protein|ribonuclease T2 family domain containing protein, expressed	LOC_Os09g36680.1 protein|ribonuclease T2 family domain containing protein, expressed
Homoeologous triplet 376	TRIAE_CS42_1AL_TGACv1_000890_AA0021220	TRIAE_CS42_1BL_TGACv1_031230_AA0109990	TRIAE_CS42_1DL_TGACv1_061236_AA0189510	AB-D	5	5	3	0.877046	0.916626	0.884325	57	122	80	46	22	39	AT1G18530.1 | Symbols: | EF hand calcium-binding protein family | chr1:6376783-6377256 FORWARD LENGTH=157	AT1G18530.1 | Symbols: | EF hand calcium-binding protein family | chr1:6376783-6377256 FORWARD LENGTH=157	AT1G18530.1 | Symbols: | EF hand calcium-binding protein family | chr1:6376783-6377256 FORWARD LENGTH=157	LOC_Os05g50180.1 protein|OsCML14 - Calmodulin-related calcium sensor protein, expressed	LOC_Os05g50180.1 protein|OsCML14 - Calmodulin-related calcium sensor protein, expressed	LOC_Os05g50180.1 protein|OsCML14 - Calmodulin-related calcium sensor protein, expressed
Homoeologous triplet 377	TRIAE_CS42_1AL_TGACv1_000892_AA0021280	TRIAE_CS42_1BL_TGACv1_033126_AA0137200	TRIAE_CS42_1DL_TGACv1_062044_AA0208010	A-B-D	5	1	7	0.860705	0.715589	0.721521	714	692	629	158	161	65	AT5G54500.1 | Symbols: FQR1 | flavodoxin-like quinone reductase 1 | chr5:22124674-22126256 FORWARD LENGTH=204, AT5G54500.2 | Symbols: FQR1 | flavodoxin-like quinone reductase 1 | chr5:22124674-22126435 FORWARD LENGTH=244	AT5G54500.1 | Symbols: FQR1 | flavodoxin-like quinone reductase 1 | chr5:22124674-22126256 FORWARD LENGTH=204, AT5G54500.2 | Symbols: FQR1 | flavodoxin-like quinone reductase 1 | chr5:22124674-22126435 FORWARD LENGTH=244	AT5G54500.1 | Symbols: FQR1 | flavodoxin-like quinone reductase 1 | chr5:22124674-22126256 FORWARD LENGTH=204, AT5G54500.2 | Symbols: FQR1 | flavodoxin-like quinone reductase 1 | chr5:22124674-22126435 FORWARD LENGTH=244	LOC_Os05g42190.1 protein|NADPH-dependent FMN reductase domain containing protein, expressed	LOC_Os05g42190.1 protein|NADPH-dependent FMN reductase domain containing protein, expressed	LOC_Os05g42190.1 protein|NADPH-dependent FMN reductase domain containing protein, expressed
Homoeologous triplet 378	TRIAE_CS42_1AL_TGACv1_000893_AA0021310	TRIAE_CS42_1BL_TGACv1_030252_AA0083910	TRIAE_CS42_1DL_TGACv1_063052_AA0223370	ABD	2	2	2	0.947116	0.962452	0.940411	651	596	693	4	0	42	AT2G44870.1 | Symbols: | unknown protein; FUNCTIONS IN: molecular_function unknown; INVOLVED IN: biological_process unknown; LOCATED IN: chloroplast; EXPRESSED IN: 22 plant structures; EXPRESSED DURING: 15 growth stages; Has 39 Blast hits to 39 proteins in 18 species: Archae - 0; Bacteria - 2; Metazoa - 0; Fungi - 0; Plants - 37; Viruses - 0; Other Eukaryotes - 0 (source: NCBI BLink). | chr2:1850…	AT2G44870.1 | Symbols: | unknown protein; FUNCTIONS IN: molecular_function unknown; INVOLVED IN: biological_process unknown; LOCATED IN: chloroplast; EXPRESSED IN: 22 plant structures; EXPRESSED DURING: 15 growth stages; Has 39 Blast hits to 39 proteins in 18 species: Archae - 0; Bacteria - 2; Metazoa - 0; Fungi - 0; Plants - 37; Viruses - 0; Other Eukaryotes - 0 (source: NCBI BLink). | chr2:1850…	AT2G44870.1 | Symbols: | unknown protein; FUNCTIONS IN: molecular_function unknown; INVOLVED IN: biological_process unknown; LOCATED IN: chloroplast; EXPRESSED IN: 22 plant structures; EXPRESSED DURING: 15 growth stages; Has 39 Blast hits to 39 proteins in 18 species: Archae - 0; Bacteria - 2; Metazoa - 0; Fungi - 0; Plants - 37; Viruses - 0; Other Eukaryotes - 0 (source: NCBI BLink). | chr2:1850…	LOC_Os10g41940.1 protein|expressed protein	LOC_Os10g41940.1 protein|expressed protein	LOC_Os10g41940.1 protein|expressed protein
Homoeologous triplet 379	TRIAE_CS42_1AL_TGACv1_000893_AA0021300	TRIAE_CS42_1BL_TGACv1_030252_AA0083920	TRIAE_CS42_1DL_TGACv1_063052_AA0223380	ABD	2	2	2	0.772605	0.806778	0.865647	577	570	562	38	9	17	AT2G38740.1 | Symbols: | Haloacid dehalogenase-like hydrolase (HAD) superfamily protein | chr2:16194639-16195995 REVERSE LENGTH=244	AT2G38740.1 | Symbols: | Haloacid dehalogenase-like hydrolase (HAD) superfamily protein | chr2:16194639-16195995 REVERSE LENGTH=244	AT2G38740.1 | Symbols: | Haloacid dehalogenase-like hydrolase (HAD) superfamily protein | chr2:16194639-16195995 REVERSE LENGTH=244	LOC_Os10g41930.2 protein|haloacid dehalogenase-like hydrolase family protein, putative, expressed, LOC_Os10g41930.1 protein|haloacid dehalogenase-like hydrolase family protein, putative, expressed, LOC_Os10g41930.6 protein|haloacid dehalogenase-like hydrolase family protein, putative, expressed, LOC_Os10g41930.7 protein|haloacid dehalogenase-like hydrolase family protein, putative, expressed, LOC…	LOC_Os10g41930.2 protein|haloacid dehalogenase-like hydrolase family protein, putative, expressed, LOC_Os10g41930.1 protein|haloacid dehalogenase-like hydrolase family protein, putative, expressed, LOC_Os10g41930.6 protein|haloacid dehalogenase-like hydrolase family protein, putative, expressed, LOC_Os10g41930.7 protein|haloacid dehalogenase-like hydrolase family protein, putative, expressed, LOC…	LOC_Os10g41930.2 protein|haloacid dehalogenase-like hydrolase family protein, putative, expressed, LOC_Os10g41930.1 protein|haloacid dehalogenase-like hydrolase family protein, putative, expressed, LOC_Os10g41930.6 protein|haloacid dehalogenase-like hydrolase family protein, putative, expressed, LOC_Os10g41930.7 protein|haloacid dehalogenase-like hydrolase family protein, putative, expressed, LOC…
Homoeologous triplet 380	TRIAE_CS42_1AL_TGACv1_000905_AA0021520	TRIAE_CS42_1BL_TGACv1_032766_AA0133950	TRIAE_CS42_1DL_TGACv1_061441_AA0195350	AD-B	1	3	1	0.968526	0.962549	0.970677	326	323	320	2	0	6	AT5G44210.1 | Symbols: ERF9, ATERF9, ATERF-9 | erf domain protein 9 | chr5:17806742-17807344 FORWARD LENGTH=200	AT5G44210.1 | Symbols: ERF9, ATERF9, ATERF-9 | erf domain protein 9 | chr5:17806742-17807344 FORWARD LENGTH=200	AT5G44210.1 | Symbols: ERF9, ATERF9, ATERF-9 | erf domain protein 9 | chr5:17806742-17807344 FORWARD LENGTH=200	LOC_Os05g41780.1 protein|AP2 domain containing protein, expressed	LOC_Os05g41780.1 protein|AP2 domain containing protein, expressed	LOC_Os05g41780.1 protein|AP2 domain containing protein, expressed
Homoeologous triplet 381	TRIAE_CS42_1AL_TGACv1_000906_AA0021560	TRIAE_CS42_1BL_TGACv1_032375_AA0129090	TRIAE_CS42_1DL_TGACv1_062500_AA0215460	ABD	1	1	1	0.881159	0.890217	0.857333	616	645	573	1	1	3	AT1G29330.1 | Symbols: ATERD2, AERD2, ERD2 | ER lumen protein retaining receptor family protein | chr1:10258580-10260906 REVERSE LENGTH=215	AT1G29330.1 | Symbols: ATERD2, AERD2, ERD2 | ER lumen protein retaining receptor family protein | chr1:10258580-10260906 REVERSE LENGTH=215	AT1G29330.1 | Symbols: ATERD2, AERD2, ERD2 | ER lumen protein retaining receptor family protein | chr1:10258580-10260906 REVERSE LENGTH=215	LOC_Os05g45310.1 protein|ER lumen protein retaining receptor, putative, expressed	LOC_Os05g45310.1 protein|ER lumen protein retaining receptor, putative, expressed	LOC_Os05g45310.1 protein|ER lumen protein retaining receptor, putative, expressed
Homoeologous triplet 382	TRIAE_CS42_1AL_TGACv1_000906_AA0021570	TRIAE_CS42_1BL_TGACv1_032375_AA0129100	TRIAE_CS42_1DL_TGACv1_062500_AA0215470	AB-D	9	9	11	0.867103	0.688372	0.686266	41	77	191	19	137	97	AT1G53400.1 | Symbols: | Ubiquitin domain-containing protein | chr1:19925009-19926400 FORWARD LENGTH=114	AT1G53400.1 | Symbols: | Ubiquitin domain-containing protein | chr1:19925009-19926400 FORWARD LENGTH=114	AT1G53400.1 | Symbols: | Ubiquitin domain-containing protein | chr1:19925009-19926400 FORWARD LENGTH=114	LOC_Os09g17620.1 protein|ubiquitin domain-containing protein 2, putative, expressed	LOC_Os09g17620.1 protein|ubiquitin domain-containing protein 2, putative, expressed	LOC_Os09g17620.1 protein|ubiquitin domain-containing protein 2, putative, expressed
Homoeologous triplet 383	TRIAE_CS42_1AL_TGACv1_000906_AA0021580	TRIAE_CS42_1BL_TGACv1_032401_AA0129470	TRIAE_CS42_1DL_TGACv1_062500_AA0215480	ABD	1	1	1	0.884741	0.94472	0.858084	315	292	297	10	18	15	AT5G45720.1 | Symbols: | AAA-type ATPase family protein | chr5:18543338-18546629 REVERSE LENGTH=966, AT5G45720.2 | Symbols: | AAA-type ATPase family protein | chr5:18543338-18546629 REVERSE LENGTH=956	AT4G18820.1 | Symbols: | AAA-type ATPase family protein | chr4:10330371-10334090 FORWARD LENGTH=1097	AT4G18820.1 | Symbols: | AAA-type ATPase family protein | chr4:10330371-10334090 FORWARD LENGTH=1097	LOC_Os05g45340.1 protein|ATP binding protein, putative, expressed	LOC_Os05g45340.1 protein|ATP binding protein, putative, expressed	LOC_Os05g45340.1 protein|ATP binding protein, putative, expressed
Homoeologous triplet 384	TRIAE_CS42_1AL_TGACv1_000906_AA0021550	TRIAE_CS42_1BL_TGACv1_032375_AA0129080	TRIAE_CS42_1DL_TGACv1_062187_AA0210180	A-B-D	5	1	3	0.757996	0.59876	0.748219	587	584	544	13	53	38	AT4G14440.1 | Symbols: ATECI3, ECI3, HCD1 | 3-hydroxyacyl-CoA dehydratase 1 | chr4:8306946-8307662 REVERSE LENGTH=238	AT4G14440.1 | Symbols: ATECI3, ECI3, HCD1 | 3-hydroxyacyl-CoA dehydratase 1 | chr4:8306946-8307662 REVERSE LENGTH=238	AT4G14440.1 | Symbols: ATECI3, ECI3, HCD1 | 3-hydroxyacyl-CoA dehydratase 1 | chr4:8306946-8307662 REVERSE LENGTH=238	LOC_Os05g45300.1 protein|enoyl-CoA hydratase/isomerase family protein, putative, expressed	LOC_Os05g45300.1 protein|enoyl-CoA hydratase/isomerase family protein, putative, expressed	LOC_Os05g45300.1 protein|enoyl-CoA hydratase/isomerase family protein, putative, expressed
Homoeologous triplet 385	TRIAE_CS42_1AL_TGACv1_000908_AA0021600	TRIAE_CS42_1BL_TGACv1_032672_AA0132670	TRIAE_CS42_1DL_TGACv1_063111_AA0224010	ABD	1	1	1	0.89115	0.926629	0.923835	722	709	725	3	0	0	AT3G08890.1 | Symbols: | Protein of unknown function, DUF538 | chr3:2706701-2707775 FORWARD LENGTH=170, AT3G08890.2 | Symbols: | Protein of unknown function, DUF538 | chr3:2706701-2707775 FORWARD LENGTH=170	AT3G08890.1 | Symbols: | Protein of unknown function, DUF538 | chr3:2706701-2707775 FORWARD LENGTH=170, AT3G08890.2 | Symbols: | Protein of unknown function, DUF538 | chr3:2706701-2707775 FORWARD LENGTH=170	AT3G08890.1 | Symbols: | Protein of unknown function, DUF538 | chr3:2706701-2707775 FORWARD LENGTH=170, AT3G08890.2 | Symbols: | Protein of unknown function, DUF538 | chr3:2706701-2707775 FORWARD LENGTH=170	LOC_Os05g27950.1 protein|DUF538 domain containing protein, putative, expressed	LOC_Os05g27950.1 protein|DUF538 domain containing protein, putative, expressed	LOC_Os05g27950.1 protein|DUF538 domain containing protein, putative, expressed
Homoeologous triplet 386	TRIAE_CS42_1AL_TGACv1_000910_AA0021670	TRIAE_CS42_1BL_TGACv1_030365_AA0088130	TRIAE_CS42_1DL_TGACv1_061515_AA0197460	BD-A	2	1	1	0.208789	-0.0283084	0.376027	296	470	341	258	256	146	AT3G18150.1 | Symbols: | RNI-like superfamily protein | chr3:6217929-6219500 FORWARD LENGTH=456	AT3G18150.1 | Symbols: | RNI-like superfamily protein | chr3:6217929-6219500 FORWARD LENGTH=456	AT3G58940.1 | Symbols: | F-box/RNI-like superfamily protein | chr3:21781002-21783213 REVERSE LENGTH=618	LOC_Os06g49930.3 protein|OsFBX207 - F-box domain containing protein, expressed, LOC_Os06g49930.2 protein|OsFBX207 - F-box domain containing protein, expressed, LOC_Os06g49930.1 protein|OsFBX207 - F-box domain containing protein, expressed	LOC_Os06g49930.3 protein|OsFBX207 - F-box domain containing protein, expressed, LOC_Os06g49930.2 protein|OsFBX207 - F-box domain containing protein, expressed, LOC_Os06g49930.1 protein|OsFBX207 - F-box domain containing protein, expressed	LOC_Os06g49930.3 protein|OsFBX207 - F-box domain containing protein, expressed, LOC_Os06g49930.2 protein|OsFBX207 - F-box domain containing protein, expressed, LOC_Os06g49930.1 protein|OsFBX207 - F-box domain containing protein, expressed
Homoeologous triplet 387	TRIAE_CS42_1AL_TGACv1_000915_AA0021770	TRIAE_CS42_1BL_TGACv1_030324_AA0086730	TRIAE_CS42_1DL_TGACv1_061188_AA0188240	Not clustered	0	0	0	0.779012	0.706597	0.904563	170	192	124	18	11	14	AT1G05300.1 | Symbols: ZIP5 | zinc transporter 5 precursor | chr1:1545258-1547709 REVERSE LENGTH=360, AT1G05300.2 | Symbols: ZIP5 | zinc transporter 5 precursor | chr1:1546161-1547709 REVERSE LENGTH=267	AT1G05300.1 | Symbols: ZIP5 | zinc transporter 5 precursor | chr1:1545258-1547709 REVERSE LENGTH=360, AT1G05300.2 | Symbols: ZIP5 | zinc transporter 5 precursor | chr1:1546161-1547709 REVERSE LENGTH=267	AT1G05300.1 | Symbols: ZIP5 | zinc transporter 5 precursor | chr1:1545258-1547709 REVERSE LENGTH=360, AT1G05300.2 | Symbols: ZIP5 | zinc transporter 5 precursor | chr1:1546161-1547709 REVERSE LENGTH=267	LOC_Os05g39560.1 protein|metal cation transporter, putative, expressed	LOC_Os05g39560.1 protein|metal cation transporter, putative, expressed	LOC_Os05g39560.1 protein|metal cation transporter, putative, expressed
Homoeologous triplet 388	TRIAE_CS42_1AL_TGACv1_000915_AA0021780	TRIAE_CS42_1BL_TGACv1_030324_AA0086740	TRIAE_CS42_1DL_TGACv1_061188_AA0188250	Not clustered	0	0	0	0.9088	0.866419	0.953492	24	24	29	2	3	2	AT3G12750.1 | Symbols: ZIP1 | zinc transporter 1 precursor | chr3:4051950-4053156 REVERSE LENGTH=355	AT1G05300.1 | Symbols: ZIP5 | zinc transporter 5 precursor | chr1:1545258-1547709 REVERSE LENGTH=360, AT1G05300.2 | Symbols: ZIP5 | zinc transporter 5 precursor | chr1:1546161-1547709 REVERSE LENGTH=267	AT1G05300.1 | Symbols: ZIP5 | zinc transporter 5 precursor | chr1:1545258-1547709 REVERSE LENGTH=360, AT1G05300.2 | Symbols: ZIP5 | zinc transporter 5 precursor | chr1:1546161-1547709 REVERSE LENGTH=267	LOC_Os05g39560.1 protein|metal cation transporter, putative, expressed	LOC_Os05g39560.1 protein|metal cation transporter, putative, expressed	LOC_Os05g39560.1 protein|metal cation transporter, putative, expressed
[truncated: 10,029 more rows]
